# Supplementary material for: Gene essentiality in cancer cell lines is modified by the sex chromosomes
Source: HighWire-hosted journal article supplement (doi:10.1101/gr.276488.121), 2022-11-01
Supplement: Supplemental_Table_S1.xlsx [file Supplemental_Table_S1.xlsx]

## Sheet: Table S1
Table S1. Cell lines features and sex chromosomes composition
									Relative DNA copy number			Heterozygosity level
DepMap ID	CCLE Name	COSMIC ID	Biological sex	Age	Lineage	Y ploidy	X ploidy	Genotype	Y-linked genes	X-linked genes	Chr. Y gene expression (PC1)	Chr X	Chr 1
ACH-000004	HEL_HAEMATOPOIETIC_AND_LYMPHOID_TISSUE	907053	Male	30	blood	Y+	X	Male_XY	0.721106	0.429216	-11.9337	NA	NA
ACH-000005	HEL9217_HAEMATOPOIETIC_AND_LYMPHOID_TISSUE	NA	Male	30	blood	Y+	X	Male_XY	0.769962	0.477896	-11.8867	NA	NA
ACH-000007	LS513_LARGE_INTESTINE	907795	Male	63	colorectal	Y+	X	Male_XY	0.53176	0.552888	-7.63568	NA	NA
ACH-000009	C2BBE1_LARGE_INTESTINE	910700	Male	72	colorectal	Y-	X	Male_X0	0.0485985	0.657226	4.12341	NA	NA
ACH-000011	253J_URINARY_TRACT	NA	Male	53	urinary_tract	Y-	XX	Male_XX	0.00376886	0.81178	4.14413	NA	NA
ACH-000012	HCC827_LUNG	1240146	Female	39	lung	Y-	XX	Female_XXhet	0.0165523	1.09505	4.06622	0.276814	NA
ACH-000013	ONCODG1_OVARY	NA	Female	60	ovary	Y-	X	Female_X0	0.00334092	0.757782	4.12875	NA	NA
ACH-000014	HS294T_SKIN	NA	Male	56	skin	Y-	XX	Male_XX	0.163867	1.01278	3.79974	NA	NA
ACH-000015	NCIH1581_LUNG	908471	Male	44	lung	NA	X	NA	0.208516	0.648345	-3.52715	NA	NA
ACH-000592	TM31_CENTRAL_NERVOUS_SYSTEM	NA	Female	42	central_nervous_system	Y-	X	Female_X0	0.0103774	0.762664	3.94018	0.0181527	NA
ACH-000018	T24_URINARY_TRACT	724812	Female	81	urinary_tract	Y-	XXhom	Female_XXhom	0.00918708	1.13841	4.3049	0	NA
ACH-000202	COLO320_LARGE_INTESTINE	NA	Female	55	colorectal	Y-	X	Female_X0	2.02081e-09	0.703779	3.90875	0.00727252	NA
ACH-000017	SKBR3_BREAST	NA	Female	43	breast	Y-	X	Female_X0	2.1712e-05	0.776949	3.91773	0	NA
ACH-000022	PATU8988S_PANCREAS	NA	Female	64	pancreas	Y-	NA	NA	1.70667e-05	0.807583	3.02784	0.40268	NA
ACH-000024	OPM2_HAEMATOPOIETIC_AND_LYMPHOID_TISSUE	909249	Female	56	plasma_cell	Y-	XXhom	Female_XXhom	0.013703	0.901682	4.13933	0	NA
ACH-000025	CH157MN_CENTRAL_NERVOUS_SYSTEM	NA	Female	NA	central_nervous_system	Y-	X	Female_X0	6.67023e-08	0.623385	4.34646	NA	NA
ACH-000019	MCF7_BREAST	905946	Female	69	breast	Y-	X	Female_X0	0.00110108	0.781378	4.22764	0	NA
ACH-000029	HCC827GR5_LUNG	NA	Female	39	lung	Y-	XX	Female_XXhet	0.00108456	1.14094	4.55323	NA	NA
ACH-000030	PC14_LUNG	753608	Male	NA	lung	Y-	XX	Male_XX	0.00970074	0.862334	4.35481	NA	NA
ACH-000035	NCIH1650_LUNG	687800	Male	27	lung	Y-	X	Male_X0	0.0120661	0.654186	4.25872	NA	NA
ACH-000037	S117_THYROID	NA	Female	47	soft_tissue	Y-	XX	Female_XXhet	9.86482e-07	0.928501	3.97554	0.413732	NA
ACH-000039	SKNMC_BONE	NA	Female	14	bone	Y-	XX	Female_XXhet	0.0041009	0.892029	3.73858	0.435091	NA
ACH-000040	U118MG_CENTRAL_NERVOUS_SYSTEM	687588	Male	NA	central_nervous_system	NA	X	NA	0.193774	0.531307	-7.49353	NA	NA
ACH-000041	RDES_BONE	NA	Male	19	bone	Y+	X	Male_XY	0.650675	0.726505	-11.544	NA	NA
ACH-000042	PANC0203_PANCREAS	1298475	Female	70	pancreas	Y-	XX	Female_XXhet	0.00108341	0.923662	3.97478	0.377999	NA
ACH-000045	MV411_HAEMATOPOIETIC_AND_LYMPHOID_TISSUE	908156	Male	10	blood	Y+	X	Male_XY	0.585344	0.574517	-7.93622	NA	NA
ACH-000047	GCIY_STOMACH	906869	Female	NA	gastric	Y-	XXhom	Female_XXhom	0.00611357	0.891375	NA	0	NA
ACH-000021	NCIH1693_LUNG	687802	Female	55	lung	Y-	X	Female_X0	0.00421552	0.608212	4.15239	0	NA
ACH-000052	A673_BONE	684052	Female	15	bone	Y-	NA	NA	0.00235633	0.736656	4.16974	0.415965	NA
ACH-000053	KARPAS299_HAEMATOPOIETIC_AND_LYMPHOID_TISSUE	907273	Male	25	lymphocyte	Y+	X	Male_XY	0.635873	0.593937	-7.37368	NA	NA
ACH-000054	HT1080_SOFT_TISSUE	907064	Male	35	soft_tissue	Y+	X	Male_XY	0.562625	0.574822	-9.41909	NA	NA
ACH-000055	D283MED_CENTRAL_NERVOUS_SYSTEM	906834	Male	6	central_nervous_system	Y+	X	Male_XY	0.637597	0.583831	-10.2391	NA	NA
ACH-000060	PANC1005_PANCREAS	925348	Male	56	pancreas	Y-	X	Male_X0	0.0102043	0.673707	4.28927	NA	NA
ACH-000067	HS683_CENTRAL_NERVOUS_SYSTEM	1240150	Male	76	central_nervous_system	Y+	X	Male_XY	0.633111	0.59463	-9.451	NA	NA
ACH-000070	697_HAEMATOPOIETIC_AND_LYMPHOID_TISSUE	906800	Male	12	blood	Y+	X	Male_XY	0.605908	0.560859	-9.63938	NA	NA
ACH-000074	KU812_HAEMATOPOIETIC_AND_LYMPHOID_TISSUE	907311	Male	38	blood	Y+	X	Male_XY	0.853691	0.531069	-12.3184	NA	NA
ACH-000028	KPL1_BREAST	NA	Female	50	breast	Y-	X	Female_X0	3.19089e-07	0.670868	3.83495	0	NA
ACH-000077	MJ_HAEMATOPOIETIC_AND_LYMPHOID_TISSUE	NA	Male	50	lymphocyte	Y+	X	Male_XY	0.597211	0.576614	-10.5271	NA	NA
ACH-000078	MHHNB11_AUTONOMIC_GANGLIA	908135	Male	4	peripheral_nervous_system	Y+	X	Male_XY	0.519399	0.534673	-10.8085	NA	NA
ACH-000048	TOV112D_OVARY	1299070	Female	42	ovary	Y-	X	Female_X0	0.000845361	0.746627	4.17324	0	NA
ACH-000085	T3M4_PANCREAS	NA	Male	64	pancreas	Y-	X	Male_X0	0.00667621	0.464382	4.18866	NA	NA
ACH-000086	ACCMESO1_PLEURA	NA	Female	61	lung	Y-	XX	Female_XXhet	0.000305401	0.998291	4.30907	0.247781	NA
ACH-000087	SKES1_BONE	684072	Male	18	bone	Y+	X	Male_XY	0.402823	0.604388	-9.2404	NA	NA
ACH-000092	NCIH2452_PLEURA	908462	Male	NA	lung	Y+	X	Male_XY	0.656377	0.622854	-9.06668	NA	NA
ACH-000093	PANC0504_PANCREAS	NA	Female	77	pancreas	Y-	XX	Female_XXhet	3.34553e-05	1.00862	3.90011	0.415908	NA
ACH-000095	D341MED_CENTRAL_NERVOUS_SYSTEM	NA	Male	3.5	central_nervous_system	Y+	X	Male_XY	0.63123	0.561263	-9.92556	NA	NA
ACH-000096	G401_SOFT_TISSUE	907299	Male	0.25	kidney	Y+	X	Male_XY	0.575272	0.582345	-10.5815	NA	NA
ACH-000097	ZR751_BREAST	NA	Female	63	breast	Y-	XX	Female_XXhet	0.0106936	1.0271	2.77591	0.255054	NA
ACH-000098	GAMG_CENTRAL_NERVOUS_SYSTEM	906868	Female	42	central_nervous_system	Y-	XX	Female_XXhet	0.00579063	1.32434	1.4052	0.421577	NA
ACH-000099	SIMA_AUTONOMIC_GANGLIA	753620	Male	1.67	peripheral_nervous_system	Y+	X	Male_XY	0.391795	0.588719	-7.8888	NA	NA
ACH-000101	KE37_HAEMATOPOIETIC_AND_LYMPHOID_TISSUE	907277	Male	27	blood	Y+	X	Male_XY	0.602476	0.610588	-10.3251	NA	NA
ACH-000108	KP3_PANCREAS	1298219	Male	75	pancreas	Y-	X	Male_X0	6.98253e-06	0.687812	4.23392	NA	NA
ACH-000111	HCC1187_BREAST	749711	Female	41	breast	Y-	XXhom	Female_XXhom	0.0219864	1.06166	4.01467	0	NA
ACH-000113	OCIAML2_HAEMATOPOIETIC_AND_LYMPHOID_TISSUE	910947	Male	65	blood	Y+	X	Male_XY	0.516972	0.575034	-9.09297	NA	NA
ACH-000114	SU8686_PANCREAS	1240218	Female	57	pancreas	Y-	NA	NA	1.873e-09	0.532303	3.93149	0.438985	NA
ACH-000115	VCAP_PROSTATE	1299075	Male	59	prostate	Y+	X	Male_XY	0.694049	0.591917	-10.0786	NA	NA
ACH-000076	NCO2_HAEMATOPOIETIC_AND_LYMPHOID_TISSUE	NA	Female	35	blood	Y-	X	Female_X0	0.0115178	0.564049	4.08715	0	NA
ACH-000118	HUPT3_PANCREAS	907285	Male	66	pancreas	Y+	X	Male_XY	0.752722	0.55271	-7.0817	NA	NA
ACH-000120	CHP212_AUTONOMIC_GANGLIA	906820	Male	NA	peripheral_nervous_system	Y+	X	Male_XY	0.566668	0.58161	-10.4736	NA	NA
ACH-000123	COV434_OVARY	NA	Female	NA	ovary	Y-	XX	Female_XXhet	3.10639e-06	0.94773	4.17911	0.378915	NA
ACH-000128	LN319_CENTRAL_NERVOUS_SYSTEM	NA	Male	67	central_nervous_system	Y+	X	Male_XY	0.311321	0.541733	-6.92313	NA	NA
ACH-000132	JHOS2_OVARY	1479995	Female	45	ovary	Y-	XX	Female_XXhet	0.0243752	1.21338	4.139	0.207754	NA
ACH-000133	HS729_SOFT_TISSUE	NA	Male	74	fibroblast	Y+	X	Male_XY	0.759335	0.643197	-9.25573	NA	NA
ACH-000082	G292CLONEA141B1_BONE	1290807	Female	9	bone	Y-	X	Female_X0	0.00201577	0.763706	4.09352	0	NA
ACH-000138	CFPAC1_PANCREAS	906821	Male	26	pancreas	NA	X	NA	0.392831	0.604098	-2.13675	NA	NA
ACH-000142	CAL29_URINARY_TRACT	1290730	Female	80	urinary_tract	Y-	XX	Female_XXhet	7.05142e-05	0.986884	3.54675	0.397011	NA
ACH-000143	HCC2429_LUNG	NA	Female	34	lung	Y-	XX	Female_XXhet	3.34518e-08	0.936998	4.34067	NA	NA
ACH-000146	THP1_HAEMATOPOIETIC_AND_LYMPHOID_TISSUE	909771	Male	1	blood	Y+	X	Male_XY	0.594368	0.579997	-9.86534	NA	NA
ACH-000116	OAW28_OVARY	946360	Female	NA	ovary	Y-	X	Female_X0	NA	0.692216	4.14919	0	NA
ACH-000137	8MGBA_CENTRAL_NERVOUS_SYSTEM	687562	Female	54	central_nervous_system	Y-	X	Female_X0	1.46147e-08	0.515726	4.17599	0	NA
ACH-000150	HCC2935_LUNG	NA	Male	39	lung	Y+	X	Male_XY	0.817816	0.689089	-10.336	NA	NA
ACH-000151	JM1_HAEMATOPOIETIC_AND_LYMPHOID_TISSUE	1327768	Male	NA	blood	Y+	X	Male_XY	0.530745	0.795825	-9.42205	NA	NA
ACH-000152	M059K_CENTRAL_NERVOUS_SYSTEM	NA	Male	33	central_nervous_system	Y+	X	Male_XY	0.376203	0.542452	-8.16499	NA	NA
ACH-000153	NCIH2052_PLEURA	688058	Male	65	lung	Y-	X	Male_X0	0.00619489	0.804314	4.15601	NA	NA
ACH-000159	OSRC2_KIDNEY	909250	Male	NA	kidney	Y+	X	Male_XY	0.733563	0.738521	-10.3924	NA	NA
ACH-000160	BT12_SOFT_TISSUE	NA	Female	0.1	soft_tissue	Y-	XX	Female_XXhet	0.000191049	0.989781	4.22619	NA	NA
ACH-000161	CORL105_LUNG	906805	Male	NA	lung	Y+	X	Male_XY	0.635617	0.576516	-6.89174	NA	NA
ACH-000163	SW579_THYROID	NA	Male	59	thyroid	Y-	X	Male_X0	0.0213254	0.668354	4.20861	NA	NA
ACH-000164	PANC1_PANCREAS	NA	Male	NA	pancreas	Y-	XX	Male_XX	0.0138758	0.897321	3.99959	NA	NA
ACH-000167	KE97_STOMACH	NA	Male	52	plasma_cell	Y-	X	Male_X0	0.00128044	0.512702	3.60152	NA	NA
ACH-000168	NOMO1_HAEMATOPOIETIC_AND_LYMPHOID_TISSUE	908451	Female	31	blood	Y-	XX	Female_XXhet	0.00315165	0.867501	4.26905	0.344156	NA
ACH-000147	T47D_BREAST	905945	Female	54	breast	Y-	X	Female_X0	0.0137169	0.646185	4.40508	0	NA
ACH-000148	HS578T_BREAST	905957	Female	74	breast	Y-	X	Female_X0	6.97413e-05	0.550021	4.05799	0	NA
ACH-000178	HS766T_PANCREAS	1298141	Male	46	pancreas	Y-	XX	Male_XX	0.000812522	0.87899	4.12138	NA	NA
ACH-000169	RD_SOFT_TISSUE	909264	Female	7	soft_tissue	Y-	X	Female_X0	0.000793998	0.530081	4.09815	0	NA
ACH-000187	CORL311_LUNG	687980	Male	63	lung	Y-	X	Male_X0	0.111331	0.661546	3.74763	NA	NA
ACH-000188	SCC25_UPPER_AERODIGESTIVE_TRACT	910701	Male	70	upper_aerodigestive	Y-	X	Male_X0	0.0469543	0.722356	4.30497	NA	NA
ACH-000189	RCC10RGB_KIDNEY	909974	Male	NA	kidney	Y-	X	Male_X0	0.00571668	0.615641	4.11051	NA	NA
ACH-000190	HDMYZ_HAEMATOPOIETIC_AND_LYMPHOID_TISSUE	907050	Male	29		Y+	X	Male_XY	0.917913	0.708382	-11.2993	NA	NA
ACH-000174	CAL62_THYROID	906828	Female	70	thyroid	Y-	X	Female_X0	1.30705e-05	0.66107	4.2931	0	NA
ACH-000195	SET2_HAEMATOPOIETIC_AND_LYMPHOID_TISSUE	NA	Female	71	blood	Y-	XX	Female_XXhet	0.01721	1.1109	4.33016	0.348737	NA
ACH-000198	EOL1_HAEMATOPOIETIC_AND_LYMPHOID_TISSUE	906856	Male	33	blood	Y+	X	Male_XY	0.5737	0.565324	-9.52851	NA	NA
ACH-000200	NMCG1_CENTRAL_NERVOUS_SYSTEM	908449	Female	NA	central_nervous_system	Y-	XX	Female_XXhet	5.28015e-06	1.21494	4.0979	0.302983	NA
ACH-000183	L363_HAEMATOPOIETIC_AND_LYMPHOID_TISSUE	924239	Female	36	plasma_cell	Y-	X	Female_X0	0.00321875	0.681525	3.94335	0	NA
ACH-000191	BHT101_THYROID	906696	Female	63	thyroid	Y-	X	Female_X0	6.32084e-07	0.759365	3.87961	0	NA
ACH-000204	LP1_HAEMATOPOIETIC_AND_LYMPHOID_TISSUE	907791	Female	56	plasma_cell	Y-	X	Female_X0	0.0035549	0.638607	4.20877	0	NA
ACH-000209	SNU1079_BILIARY_TRACT	NA	Male	NA	bile_duct	Y+	X	Male_XY	0.791452	0.596328	-9.03058	NA	NA
ACH-000211	DAOY_CENTRAL_NERVOUS_SYSTEM	906833	Male	4	central_nervous_system	NA	X	NA	0.228608	0.610372	1.99018	NA	NA
ACH-000207	DETROIT562_UPPER_AERODIGESTIVE_TRACT	906837	Female	NA	upper_aerodigestive	Y-	X	Female_X0	0.00675935	0.635411	3.97646	0	NA
ACH-000215	LN382_CENTRAL_NERVOUS_SYSTEM	NA	Male	NA	central_nervous_system	Y-	X	Male_X0	2.95411e-06	0.625084	4.25472	NA	NA
ACH-000216	JHESOAD1_OESOPHAGUS	NA	Male	NA	esophagus	Y-	XX	Male_XX	0.152583	1.01806	4.18484	NA	NA
ACH-000212	CAL120_BREAST	906826	Female	43	breast	Y-	X	Female_X0	0.0169414	0.794586	4.2966	0	NA
ACH-000219	A375_SKIN	906793	Female	54	skin	Y-	XXhom	Female_XXhom	0.0027546	0.830675	4.0867	0	NA
ACH-000221	SNU398_LIVER	1240217	Male	42	liver	NA	X	NA	0.233636	0.441067	-2.27786	NA	NA
ACH-000217	JHH6_LIVER	1240159	Female	57	liver	Y-	X	Female_X0	8.04769e-05	0.682109	4.27435	0	NA
ACH-000222	ASPC1_PANCREAS	910702	Female	62	pancreas	Y-	X	Female_X0	4.08166e-06	0.686829	4.21377	0	NA
ACH-000226	SUPM2_HAEMATOPOIETIC_AND_LYMPHOID_TISSUE	1331040	Female	5	lymphocyte	Y-	XX	Female_XXhet	0.0137215	1.07275	4.32242	0.301609	NA
ACH-000227	KPNYN_AUTONOMIC_GANGLIA	907314	Male	2	peripheral_nervous_system	Y+	X	Male_XY	0.567643	0.607981	-10.7816	NA	NA
ACH-000228	BICR31_UPPER_AERODIGESTIVE_TRACT	1290725	Male	NA	upper_aerodigestive	Y-	X	Male_X0	0.0115041	0.59792	4.01086	NA	NA
ACH-000231	KALS1_CENTRAL_NERVOUS_SYSTEM	907271	Female	NA	central_nervous_system	Y-	XX	Female_XXhet	0.0096601	1.2419	4.21153	0.0994102	NA
ACH-000232	U251MG_CENTRAL_NERVOUS_SYSTEM	905983	Male	NA	central_nervous_system	Y+	X	Male_XY	0.455015	0.767744	-7.88725	NA	NA
ACH-000233	DEL_HAEMATOPOIETIC_AND_LYMPHOID_TISSUE	906836	Male	12	lymphocyte	Y+	X	Male_XY	0.398079	0.697763	-7.83584	NA	NA
ACH-000234	CAKI2_KIDNEY	NA	Male	69	kidney	Y+	X	Male_XY	0.437468	0.632518	-7.82282	NA	NA
ACH-000235	PANC0403_PANCREAS	1298476	Male	70	pancreas	Y-	X	Male_X0	0.0158008	0.681891	4.23213	NA	NA
ACH-000237	JHOM1_OVARY	NA	Female	88	ovary	Y-	NA	NA	7.04478e-07	0.793568	3.91489	0.360133	NA
ACH-000238	SCC4_UPPER_AERODIGESTIVE_TRACT	910904	Male	55	upper_aerodigestive	NA	X	NA	0.579652	0.611613	-4.92412	NA	NA
ACH-000223	HCC1937_BREAST	749714	Female	24	breast	Y-	X	Female_X0	0.0391572	0.73992	4.30003	0	NA
ACH-000244	DKMG_CENTRAL_NERVOUS_SYSTEM	906839	Female	67	central_nervous_system	Y-	XX	Female_XXhet	7.62284e-05	0.874112	3.69296	0.431999	NA
ACH-000247	OCUM1_STOMACH	1298358	Female	38	gastric	Y-	XX	Female_XXhet	0.0043949	1.18673	4.31997	0.326061	NA
ACH-000248	AU565_BREAST	910704	Female	43	breast	Y-	XXhom	Female_XXhom	0.0169101	0.937229	3.92396	0	NA
ACH-000249	CL11_LARGE_INTESTINE	1290769	Male	NA	colorectal	NA	X	NA	0.534808	0.593487	-2.86242	NA	NA
ACH-000251	NCIH2887_LUNG	NA	Male	NA	lung	NA	X	NA	0.487011	0.69476	-3.82498	NA	NA
ACH-000253	COLO201_LARGE_INTESTINE	NA	Male	70	colorectal	NA	X	NA	0.428837	0.743087	-0.713209	NA	NA
ACH-000243	DANG_PANCREAS	1290797	Female	NA	pancreas	Y-	X	Female_X0	0.00894351	0.760122	4.17689	0	NA
ACH-000255	LMSU_STOMACH	NA	Female	27	gastric	Y-	X	Female_X0	0.0241861	0.622762	3.06528	0	NA
ACH-000257	CORL279_LUNG	910937	Male	63	lung	Y+	X	Male_XY	0.583563	0.687672	-8.25374	NA	NA
ACH-000258	DU4475_BREAST	906844	Female	62	breast	Y-	XX	Female_XXhet	0.00806027	1.04307	3.98073	NA	NA
ACH-000256	COV318_OVARY	NA	Female	NA	ovary	Y-	X	Female_X0	0.00293967	0.616146	3.74466	0	NA
ACH-000259	KELLY_AUTONOMIC_GANGLIA	753618	Female	NA	peripheral_nervous_system	Y-	X	Female_X0	0.00679858	0.533302	4.05236	0	NA
ACH-000262	UOK101_KIDNEY	NA	Female	NA	kidney	Y-	X	Female_X0	3.55263e-06	0.685413	4.34577	NA	NA
ACH-000263	KASUMI1_HAEMATOPOIETIC_AND_LYMPHOID_TISSUE	907275	Male	7	blood	Y-	X	Male_X0	0.000142912	0.542411	3.94977	NA	NA
ACH-000260	SKNAS_AUTONOMIC_GANGLIA	724828	Female	6	peripheral_nervous_system	Y-	X	Female_X0	0.0105589	0.692678	4.04913	0	NA
ACH-000265	KP4_PANCREAS	753572	Male	50	pancreas	Y-	X	Male_X0	0.00324624	0.708024	4.13901	NA	NA
ACH-000266	SNU213_PANCREAS	NA	Male	65	pancreas	Y+	X	Male_XY	0.420957	0.622441	-7.74002	NA	NA
ACH-000273	SF539_CENTRAL_NERVOUS_SYSTEM	905984	Female	NA	central_nervous_system	Y-	X	Female_X0	3.05884e-09	0.643086	3.98121	NA	NA
ACH-000274	HS852T_SKIN	NA	Male	53	skin	Y+	XX	Male_XXY	0.546513	0.940649	-8.6036	NA	NA
ACH-000276	HCC38_BREAST	749717	Female	50	breast	Y-	XX	Female_XXhet	0.0343893	1.08812	4.12714	0.171276	NA
ACH-000264	CALU6_LUNG	724859	Female	61	lung	Y-	X	Female_X0	0.0148564	0.50612	4.18542	0	NA
ACH-000278	COV362_OVARY	NA	Female	NA	ovary	Y-	XXhom	Female_XXhom	0.00507763	0.843049	4.1412	0	NA
ACH-000280	SNU840_OVARY	NA	Female	45	ovary	Y-	XX	Female_XXhet	0.000108341	0.941368	4.23647	0.283227	NA
ACH-000281	KP2_PANCREAS	1298218	Female	65	pancreas	Y-	XX	Female_XXhet	0.000125995	1.21811	4.39093	0.349711	NA
ACH-000286	SNU1033_LARGE_INTESTINE	NA	Female	45	colorectal	Y-	X	Female_X0	0.0004636	0.567034	4.25558	NA	NA
ACH-000277	HCC1419_BREAST	907045	Female	42	breast	Y-	X	Female_X0	0.0154261	0.703103	4.12049	0	NA
ACH-000290	NCIH209_LUNG	688013	Male	55	lung	Y+	X	Male_XY	0.553473	0.591308	-10.2426	NA	NA
ACH-000291	OV90_OVARY	1240197	Female	64	ovary	Y-	XX	Female_XXhet	0.0217826	1.12669	4.35722	0.392888	NA
ACH-000292	NCIH841_LUNG	1240192	Male	51	lung	Y+	X	Male_XY	0.530663	0.755081	-8.8726	NA	NA
ACH-000293	KLE_ENDOMETRIUM	924187	Female	64	uterus	Y-	XX	Female_XXhet	0.0206574	1.12582	3.79185	0.296112	NA
ACH-000288	BT549_BREAST	905951	Female	72	breast	Y-	X	Female_X0	7.1278e-08	0.612658	3.81667	0	NA
ACH-000294	NB4_HAEMATOPOIETIC_AND_LYMPHOID_TISSUE	1323913	Female	23	blood	Y-	X	Female_X0	0.0134154	0.657091	4.22117	0	NA
ACH-000296	OUMS23_LARGE_INTESTINE	NA	Male	NA	colorectal	Y-	X	Male_X0	1.62799e-08	0.419316	3.83342	NA	NA
ACH-000295	EM2_HAEMATOPOIETIC_AND_LYMPHOID_TISSUE	906855	Female	5	blood	Y-	X	Female_X0	0.000214122	0.369124	3.79527	0	NA
ACH-000302	SNU1077_ENDOMETRIUM	NA	Female	60	uterus	Y-	X	Female_X0	0.00193344	0.604774	3.69199	0	NA
ACH-000303	SNU5_STOMACH	908445	Female	33	gastric	Y-	X	Female_X0	1.87538e-09	0.573037	3.95943	0	NA
ACH-000305	ECGI10_OESOPHAGUS	753555	Male	65	esophagus	NA	X	NA	0.0681344	0.565103	-0.238723	NA	NA
ACH-000307	PK1_PANCREAS	NA	Male	NA	pancreas	NA	X	NA	0.500142	0.676033	-2.25072	NA	NA
ACH-000308	EFO21_OVARY	911905	Female	56	ovary	Y-	XX	Female_XXhet	0.0128251	1.14699	3.9471	0.223215	NA
ACH-000310	IMR32_AUTONOMIC_GANGLIA	NA	Male	1	peripheral_nervous_system	Y+	X	Male_XY	0.508809	0.490086	-9.47564	NA	NA
ACH-000311	NCIH2122_LUNG	722046	Female	46	lung	Y-	XX	Female_XXhet	0.00610208	0.948375	4.22763	0.414247	NA
ACH-000312	SKNBE2_AUTONOMIC_GANGLIA	NA	Male	2	peripheral_nervous_system	Y+	X	Male_XY	0.539438	0.544933	-10.2357	NA	NA
ACH-000313	KMRC3_KIDNEY	NA	Male	NA	kidney	Y+	X	Male_XY	0.596561	0.590687	-10.5768	NA	NA
ACH-000315	KARPAS422_HAEMATOPOIETIC_AND_LYMPHOID_TISSUE	907274	Female	73	lymphocyte	Y-	XX	Female_XXhet	0.000200303	0.860559	3.96961	NA	NA
ACH-000316	SNU886_LIVER	NA	Male	57	liver	Y+	X	Male_XY	0.600034	0.596733	-8.9079	NA	NA
ACH-000317	TUHR14TKB_KIDNEY	NA	Male	NA	kidney	Y+	X	Male_XY	0.505305	0.597468	-8.89528	NA	NA
ACH-000318	TE10_OESOPHAGUS	753622	Male	NA	esophagus	Y-	X	Male_X0	1.63391e-05	0.65145	2.99361	NA	NA
ACH-000319	MPP89_PLEURA	908150	Male	67	lung	Y+	X	Male_XY	0.890425	0.770508	-11.4685	NA	NA
ACH-000320	PSN1_PANCREAS	910546	Male	NA	pancreas	Y-	X	Male_X0	1.26964e-06	0.674319	4.22737	NA	NA
ACH-000322	HT144_SKIN	907067	Male	29	skin	NA	X	NA	0.662702	0.481395	-3.16678	NA	NA
ACH-000323	42MGBA_CENTRAL_NERVOUS_SYSTEM	687561	Male	63	central_nervous_system	Y-	X	Male_X0	0.00639399	0.468111	4.19085	NA	NA
ACH-000304	WM115_SKIN	909784	Female	59	skin	Y-	X	Female_X0	4.2829e-07	0.552854	3.90506	0	NA
ACH-000325	SNU620_STOMACH	NA	Female	59	gastric	Y-	XX	Female_XXhet	0.000210602	0.971659	3.85421	0.311859	NA
ACH-000326	JURLMK1_HAEMATOPOIETIC_AND_LYMPHOID_TISSUE	1327771	Male	73	blood	Y+	X	Male_XY	0.593556	0.599697	-10.2176	NA	NA
ACH-000329	CCFSTTG1_CENTRAL_NERVOUS_SYSTEM	906823	Female	68	central_nervous_system	Y-	XX	Female_XXhet	0.0186587	0.93356	3.79474	0.393518	NA
ACH-000324	JHOC5_OVARY	NA	Female	NA	ovary	Y-	X	Female_X0	0.00201888	0.755341	4.16633	0	NA
ACH-000331	ISTMES2_PLEURA	NA	Male	71	lung	Y+	X	Male_XY	0.648126	0.613773	-10.6994	NA	NA
ACH-000332	YAPC_PANCREAS	909904	Male	43	pancreas	Y+	X	Male_XY	0.759135	0.685347	-10.1459	NA	NA
ACH-000334	DB_HAEMATOPOIETIC_AND_LYMPHOID_TISSUE	906832	Male	45	lymphocyte	Y+	X	Male_XY	0.649857	0.713115	-11.746	NA	NA
ACH-000335	MSTO211H_PLEURA	908152	Male	62	lung	Y+	X	Male_XY	0.609982	0.651331	-10.0432	NA	NA
ACH-000336	OCIAML3_HAEMATOPOIETIC_AND_LYMPHOID_TISSUE	1290455	Male	57	blood	Y-	X	Male_X0	0.000201324	0.526413	1.7048	NA	NA
ACH-000339	HCC461_LUNG	NA	Male	NA	lung	Y-	X	Male_X0	0.00231612	0.773425	4.22245	NA	NA
ACH-000341	SKNFI_AUTONOMIC_GANGLIA	688087	Male	11	peripheral_nervous_system	Y+	X	Male_XY	0.583509	0.55341	-10.6759	NA	NA
ACH-000343	NCIH522_LUNG	905944	Male	60	lung	Y-	XX	Male_XX	0.0179504	0.993111	2.90737	NA	NA
ACH-000344	SNU668_STOMACH	NA	Male	63	gastric	Y-	XX	Male_XX	0.00531568	0.934327	3.9556	NA	NA
ACH-000346	JVM3_HAEMATOPOIETIC_AND_LYMPHOID_TISSUE	907270	Male	73	blood	Y+	X	Male_XY	0.572051	0.575131	-9.59069	NA	NA
ACH-000330	EFM19_BREAST	906851	Female	50	breast	Y-	X	Female_X0	0.00191539	0.778416	4.22156	0	NA
ACH-000350	COLO678_LARGE_INTESTINE	910689	Male	69	colorectal	Y-	X	Male_X0	0.000109975	0.70426	3.94612	NA	NA
ACH-000352	HCC1428_BREAST	1290905	Female	49	breast	Y-	XX	Female_XXhet	0.019099	1.19523	3.89616	0.357212	NA
ACH-000355	NCIH82_LUNG	688031	Male	41	lung	Y-	XX	Male_XX	0.0236924	0.891008	4.3488	NA	NA
ACH-000356	MKN45_STOMACH	925340	Female	62	gastric	Y-	XX	Female_XXhet	0.00495103	0.949457	4.19612	0.232835	NA
ACH-000361	SKHEP1_LIVER	909719	Male	52	liver	Y-	XX	Male_XX	0.0011165	0.839231	4.16003	NA	NA
ACH-000362	MOLM13_HAEMATOPOIETIC_AND_LYMPHOID_TISSUE	1330947	Male	20	blood	Y+	X	Male_XY	0.556621	0.571874	-8.31231	NA	NA
ACH-000363	SKMM2_HAEMATOPOIETIC_AND_LYMPHOID_TISSUE	753612	Male	54	plasma_cell	Y-	X	Male_X0	3.26701e-05	0.537481	4.27958	NA	NA
ACH-000348	RPMI7951_SKIN	910903	Female	18	skin	Y-	X	Female_X0	0.00484061	0.734661	3.94892	0	NA
ACH-000365	SUDHL4_HAEMATOPOIETIC_AND_LYMPHOID_TISSUE	1331035	Male	38	lymphocyte	Y+	X	Male_XY	0.558706	0.572693	-8.42296	NA	NA
ACH-000366	SKNDZ_AUTONOMIC_GANGLIA	688086	Female	2	peripheral_nervous_system	Y-	NA	NA	8.01107e-06	0.752945	4.02861	0.292161	NA
ACH-000368	SNU1105_CENTRAL_NERVOUS_SYSTEM	NA	Male	61	central_nervous_system	Y+	X	Male_XY	0.380071	0.628989	-6.97081	NA	NA
ACH-000370	SNU626_CENTRAL_NERVOUS_SYSTEM	NA	Male	65	central_nervous_system	Y+	X	Male_XY	0.60293	0.682686	-9.18798	NA	NA
ACH-000371	RL_HAEMATOPOIETIC_AND_LYMPHOID_TISSUE	910861	Male	52	lymphocyte	Y+	X	Male_XY	0.55107	0.569448	-7.08114	NA	NA
ACH-000364	U2OS_BONE	909776	Female	15	bone	Y-	X	Female_X0	0.0147675	0.626694	4.24606	0	NA
ACH-000375	G402_SOFT_TISSUE	907298	Female	0.75	soft_tissue	Y-	XX	Female_XXhet	0.0186424	1.0292	4.05756	0.472256	NA
ACH-000376	SF295_CENTRAL_NERVOUS_SYSTEM	905985	Female	67	central_nervous_system	Y-	XX	Female_XXhet	0.0216663	1.0841	4.28239	0.411957	NA
ACH-000378	NCIH647_LUNG	1240191	Male	56	lung	Y-	X	Male_X0	2.07226e-05	0.591108	4.12315	NA	NA
ACH-000381	T84_LARGE_INTESTINE	909761	Male	72	colorectal	Y-	XX	Male_XX	0.0105293	1.05951	4.37077	NA	NA
ACH-000374	HCC1143_BREAST	749710	Female	52	breast	Y-	X	Female_X0	0.003235	0.769314	4.32301	0	NA
ACH-000387	TF1_HAEMATOPOIETIC_AND_LYMPHOID_TISSUE	NA	Male	35	blood	Y+	X	Male_XY	1.11363	0.607332	-12.651	NA	NA
ACH-000389	H4_CENTRAL_NERVOUS_SYSTEM	907042	Male	37	central_nervous_system	Y+	X	Male_XY	0.603634	0.723878	-10.3286	NA	NA
ACH-000390	LUDLU1_LUNG	NA	Male	72	lung	Y-	X	Male_X0	0.00598813	0.699655	4.13004	NA	NA
ACH-000391	MHHES1_BONE	908134	Male	12	bone	Y-	X	Male_X0	0.000113561	0.567139	4.07424	NA	NA
ACH-000393	HLF_LIVER	NA	Male	69	liver	Y-	X	Male_X0	1.46814e-06	0.748869	4.15972	NA	NA
ACH-000395	NCIH520_LUNG	908443	Male	NA	lung	Y-	X	Male_X0	0.00134033	0.779841	4.173	NA	NA
ACH-000383	OE33_OESOPHAGUS	910549	Female	73	esophagus	Y-	X	Female_X0	2.0178e-09	0.676828	4.29457	0	NA
ACH-000398	RI1_HAEMATOPOIETIC_AND_LYMPHOID_TISSUE	NA	Female	57	lymphocyte	Y-	XX	Female_XXhet	1.14229e-05	0.878258	4.00936	0.411155	NA
ACH-000401	COLO800_SKIN	906813	Male	14	skin	Y+	X	Male_XY	0.776481	0.713273	-10.2568	NA	NA
ACH-000402	BL70_HAEMATOPOIETIC_AND_LYMPHOID_TISSUE	NA	Male	16	lymphocyte	Y+	X	Male_XY	0.593628	0.582411	-8.82824	NA	NA
ACH-000403	NCIH747_LARGE_INTESTINE	908457	Male	69	colorectal	Y+	X	Male_XY	0.393089	0.783391	-6.85764	NA	NA
ACH-000405	MEC1_HAEMATOPOIETIC_AND_LYMPHOID_TISSUE	NA	Male	61	blood	Y+	X	Male_XY	0.576361	0.609222	-9.3721	NA	NA
ACH-000406	U937_HAEMATOPOIETIC_AND_LYMPHOID_TISSUE	NA	Male	37	blood	Y-	XX	Male_XX	9.7909e-05	0.83205	4.25742	NA	NA
ACH-000407	SNU685_ENDOMETRIUM	NA	Female	70	uterus	Y-	XX	Female_XXhet	0.0150752	0.932782	4.10303	0.0765046	NA
ACH-000408	TE5_OESOPHAGUS	735784	Female	73	esophagus	Y-	XX	Female_XXhet	0.025556	1.02047	4.03081	0.266964	NA
ACH-000410	SAOS2_BONE	909707	Female	11	bone	Y-	XX	Female_XXhet	0.0141716	1.24371	4.15036	NA	NA
ACH-000411	769P_KIDNEY	910922	Female	63	kidney	Y-	XX	Female_XXhet	0.00146556	1.04649	4.1663	0.404341	NA
ACH-000414	NCIH1944_LUNG	1240185	Female	62	lung	Y-	XX	Female_XXhet	0.0167997	0.920315	4.16108	0.418027	NA
ACH-000415	BICR6_UPPER_AERODIGESTIVE_TRACT	NA	Male	NA	upper_aerodigestive	NA	X	NA	0.420953	0.702982	-3.76889	NA	NA
ACH-000416	NCIH838_LUNG	910399	Male	59	lung	Y-	X	Male_X0	0.00113127	0.612422	4.36849	NA	NA
ACH-000417	PANC0813_PANCREAS	925347	Male	85	pancreas	Y-	X	Male_X0	0.000240601	0.484905	4.15137	NA	NA
ACH-000420	SNU449_LIVER	909738	Male	52	liver	Y-	X	Male_X0	0.0503255	0.807219	0.223363	NA	NA
ACH-000421	SW837_LARGE_INTESTINE	909755	Male	53	colorectal	Y-	X	Male_X0	2.64927e-09	0.694742	2.51932	NA	NA
ACH-000422	SNU475_LIVER	909739	Male	43	liver	Y+	X	Male_XY	0.460508	0.738702	-6.88261	NA	NA
ACH-000424	TC71_BONE	1240221	Male	22	bone	Y+	X	Male_XY	0.336288	0.639523	-8.18692	NA	NA
ACH-000397	TEN_ENDOMETRIUM	NA	Female	74	uterus	Y-	X	Female_X0	0.000123573	0.674489	4.27241	0	NA
ACH-000427	NCIN87_STOMACH	908461	Male	NA	gastric	Y+	X	Male_XY	0.592132	0.613645	-9.55838	NA	NA
ACH-000431	NCIH1694_LUNG	688006	Male	61	lung	Y-	XX	Male_XX	0.0142783	0.908932	4.23584	NA	NA
ACH-000433	CAKI1_KIDNEY	905963	Male	49	kidney	Y-	X	Male_X0	0.0323819	0.766285	4.14808	NA	NA
ACH-000426	KMS20_HAEMATOPOIETIC_AND_LYMPHOID_TISSUE	NA	Female	65	plasma_cell	Y-	X	Female_X0	0.0212963	0.707745	NA	0	NA
ACH-000434	NCIH1915_LUNG	1240184	Female	61	lung	Y-	X	Female_X0	1.32886e-05	0.533905	4.16178	0	NA
ACH-000437	SW1088_CENTRAL_NERVOUS_SYSTEM	909745	Male	72	central_nervous_system	Y+	X	Male_XY	0.633294	0.679676	-9.58482	NA	NA
ACH-000438	LU65_LUNG	724863	Male	64	lung	Y-	X	Male_X0	0.00641681	0.659538	4.09819	NA	NA
ACH-000435	EFE184_ENDOMETRIUM	NA	Female	69	uterus	Y-	X	Female_X0	0.0150124	0.706751	4.2841	0	NA
ACH-000444	LU99_LUNG	NA	Male	63	lung	Y-	X	Male_X0	0.0153681	0.535431	4.31911	NA	NA
ACH-000445	KNS60_CENTRAL_NERVOUS_SYSTEM	NA	Male	55	central_nervous_system	Y-	X	Male_X0	0.00869461	0.591616	4.16732	NA	NA
ACH-000448	NCIH1666_LUNG	908473	Female	50	lung	Y-	XX	Female_XXhet	0.0199853	0.901399	4.24866	0.41167	NA
ACH-000441	SH4_SKIN	909713	Female	60	skin	Y-	X	Female_X0	1.7471e-05	0.675917	3.98521	0	NA
ACH-000452	TE8_OESOPHAGUS	753623	Male	NA	esophagus	Y-	X	Male_X0	2.52792e-07	0.66933	2.64203	NA	NA
ACH-000454	HCC95_LUNG	NA	Male	65	lung	Y-	X	Male_X0	0.00759303	0.578994	4.17748	NA	NA
ACH-000455	LN428_CENTRAL_NERVOUS_SYSTEM	NA	Male	NA	central_nervous_system	Y+	XX	Male_XXY	0.695227	0.826979	-8.93357	NA	NA
ACH-000450	MELHO_SKIN	908124	Female	NA	skin	Y-	X	Female_X0	1.90065e-09	0.612332	4.17576	0	NA
ACH-000459	TUHR10TKB_KIDNEY	NA	Male	69	kidney	Y+	X	Male_XY	0.626302	0.645588	-9.38809	NA	NA
ACH-000460	SNU8_OVARY	NA	Female	55	ovary	Y-	X	Female_X0	6.06222e-06	0.684207	4.11776	NA	NA
ACH-000463	NCIH460_LUNG	905943	Male	NA	lung	Y+	XX	Male_XXY	0.768749	0.842947	-9.63694	NA	NA
ACH-000464	CAS1_CENTRAL_NERVOUS_SYSTEM	910943	Male	63	central_nervous_system	Y+	X	Male_XY	0.569858	0.63697	-7.98443	NA	NA
ACH-000456	BCPAP_THYROID	924104	Female	76	thyroid	Y-	X	Female_X0	2.63802e-06	0.682434	3.91433	0	NA
ACH-000469	YH13_CENTRAL_NERVOUS_SYSTEM	909905	Male	40	central_nervous_system	Y-	X	Male_X0	2.92845e-09	0.536464	2.16142	NA	NA
ACH-000470	SW1463_LARGE_INTESTINE	909748	Female	66	colorectal	Y-	XX	Female_XXhet	2.20487e-09	0.865857	1.98386	0.376396	NA
ACH-000471	LI7_LIVER	NA	Male	45	liver	Y-	X	Male_X0	0.0058668	0.763782	4.00673	NA	NA
ACH-000472	HSC2_UPPER_AERODIGESTIVE_TRACT	753562	Male	69	upper_aerodigestive	NA	X	NA	0.228182	0.664676	-3.07751	NA	NA
ACH-000473	RT112_URINARY_TRACT	909704	Female	NA	urinary_tract	Y-	XX	Female_XXhet	0.0136929	1.05538	4.21628	0.432171	NA
ACH-000475	HUH1_LIVER	1298146	Male	53	liver	Y+	X	Male_XY	0.420514	0.705055	-7.30534	NA	NA
ACH-000476	JHH4_LIVER	1240158	Male	51	liver	Y-	X	Male_X0	0.00011516	0.578475	4.2462	NA	NA
ACH-000477	MALME3M_SKIN	NA	Male	43	skin	Y+	X	Male_XY	0.574791	0.633998	-8.15581	NA	NA
ACH-000478	SNU387_LIVER	909736	Female	41	liver	Y-	XX	Female_XXhet	0.0118596	1.11723	3.93645	0.207983	NA
ACH-000480	HUH7_LIVER	907071	Male	57	liver	Y-	X	Male_X0	1.66604e-09	0.675654	3.99346	NA	NA
ACH-000481	NCIH2170_LUNG	687815	Male	NA	lung	Y-	X	Male_X0	0.0163851	0.806201	4.24065	NA	NA
ACH-000483	SNU182_LIVER	1240216	Male	24	liver	Y+	XX	Male_XXY	0.655472	0.853881	-9.71659	NA	NA
ACH-000484	VMRCRCW_KIDNEY	1240224	Male	NA	kidney	Y+	X	Male_XY	0.571109	0.569524	-10.1091	NA	NA
ACH-000485	GSU_STOMACH	NA	Male	37	gastric	Y-	X	Male_X0	0.00461725	0.7408	4.22322	NA	NA
ACH-000486	KU1919_URINARY_TRACT	907312	Male	76	urinary_tract	Y-	X	Male_X0	0.00517992	0.643725	2.82213	NA	NA
ACH-000487	F36P_HAEMATOPOIETIC_AND_LYMPHOID_TISSUE	NA	Male	68	blood	Y+	X	Male_XY	0.553393	0.608829	-9.12152	NA	NA
ACH-000488	TE11_OESOPHAGUS	946354	Male	58	esophagus	Y-	X	Male_X0	0.0107224	0.731792	4.41767	NA	NA
ACH-000489	SW1116_LARGE_INTESTINE	909746	Male	73	colorectal	NA	X	NA	0.538581	0.723491	-2.07662	NA	NA
ACH-000490	SF767_CENTRAL_NERVOUS_SYSTEM	NA	Female	NA	central_nervous_system	Y-	XX	Female_XXhet	0.000141849	0.970771	4.13794	NA	NA
ACH-000491	NCIH716_LARGE_INTESTINE	908458	Male	33	colorectal	Y-	X	Male_X0	4.2757e-09	0.654809	4.07644	NA	NA
ACH-000493	SNU423_LIVER	909737	Male	40	liver	Y+	XX	Male_XXY	0.461489	1.02602	-6.18987	NA	NA
ACH-000495	TUHR4TKB_KIDNEY	NA	Male	60	kidney	Y-	X	Male_X0	0.000201825	0.699839	2.79871	NA	NA
ACH-000496	NCIH1792_LUNG	724868	Male	50	lung	Y-	X	Male_X0	0.00439282	0.699605	4.13489	NA	NA
ACH-000498	KO52_HAEMATOPOIETIC_AND_LYMPHOID_TISSUE	1330932	Male	46	blood	Y+	X	Male_XY	0.613528	0.573388	-9.97984	NA	NA
ACH-000499	EW8_BONE	NA	Male	NA	bone	Y+	X	Male_XY	1.17966	0.708207	-12.1952	NA	NA
ACH-000500	SNU46_UPPER_AERODIGESTIVE_TRACT	NA	Male	66	upper_aerodigestive	NA	X	NA	0.0711976	0.616416	-2.5097	NA	NA
ACH-000466	SNU216_STOMACH	NA	Female	46	gastric	Y-	X	Female_X0	0.000167937	0.618146	2.3921	0	NA
ACH-000503	BICR16_UPPER_AERODIGESTIVE_TRACT	NA	Male	NA	upper_aerodigestive	Y-	X	Male_X0	4.24749e-05	0.693079	4.07978	NA	NA
ACH-000504	SNB75_CENTRAL_NERVOUS_SYSTEM	905982	Female	NA	central_nervous_system	Y-	X	Female_X0	0.000479786	0.734975	3.91751	NA	NA
ACH-000502	TCCPAN2_PANCREAS	NA	Female	68	pancreas	Y-	X	Female_X0	0.00678794	0.392622	3.38342	0	NA
ACH-000507	KE39_STOMACH	NA	Male	77	gastric	Y-	X	Male_X0	0.00619077	0.770514	4.31216	NA	NA
ACH-000510	NCIH1299_LUNG	724831	Male	43	lung	Y-	X	Male_X0	0.0566046	0.709822	4.322	NA	NA
ACH-000511	CALU1_LUNG	NA	Male	47	lung	Y-	XX	Male_XX	0.016137	0.848516	4.00172	NA	NA
ACH-000512	INA6_HAEMATOPOIETIC_AND_LYMPHOID_TISSUE	NA	Male	NA	plasma_cell	Y+	X	Male_XY	0.507404	0.655106	-8.52061	NA	NA
ACH-000514	NCIH1092_LUNG	687997	Male	67	lung	Y+	XX	Male_XXY	0.407168	0.825375	-8.5959	NA	NA
ACH-000516	CAL78_BONE	1290765	Male	76	bone	Y+	X	Male_XY	0.505278	0.745398	-8.3009	NA	NA
ACH-000517	SNU410_PANCREAS	NA	Male	53	pancreas	Y-	X	Male_X0	0.0174946	0.752051	4.50125	NA	NA
ACH-000518	CAL33_UPPER_AERODIGESTIVE_TRACT	753541	Male	69	upper_aerodigestive	Y+	X	Male_XY	0.897916	0.580176	-10.7931	NA	NA
ACH-000505	RKN_SOFT_TISSUE	1298539	Female	45	soft_tissue	Y-	X	Female_X0	0.00530915	0.616752	4.07304	0	NA
ACH-000521	NCIH2030_LUNG	722045	Male	NA	lung	NA	X	NA	0.253477	0.654096	-3.04879	NA	NA
ACH-000522	UMUC3_URINARY_TRACT	724838	Male	NA	urinary_tract	Y-	X	Male_X0	6.11269e-05	0.610666	3.71648	NA	NA
ACH-000520	59M_OVARY	NA	Female	NA	ovary	Y-	X	Female_X0	0.0214615	0.749642	4.18033	0	NA
ACH-000525	NCIH2171_LUNG	688015	Male	50	lung	Y+	X	Male_XY	0.651125	0.63199	-10.4861	NA	NA
ACH-000524	KURAMOCHI_OVARY	909975	Female	NA	ovary	Y-	X	Female_X0	6.07679e-06	0.46055	4.09502	0	NA
ACH-000528	ABC1_LUNG	906791	Male	47	lung	Y-	X	Male_X0	0.0324972	0.702693	4.20129	NA	NA
ACH-000527	OVISE_OVARY	1240198	Female	40	ovary	Y-	X	Female_X0	1.58929e-05	0.731971	4.06711	0	NA
ACH-000537	SNU761_LIVER	NA	Male	49	liver	Y-	XX	Male_XX	0.000350009	0.917179	3.71978	NA	NA
ACH-000535	BXPC3_PANCREAS	906693	Female	61	pancreas	Y-	X	Female_X0	3.36115e-05	0.635293	4.17907	0	NA
ACH-000541	KMS34_HAEMATOPOIETIC_AND_LYMPHOID_TISSUE	NA	Female	60	plasma_cell	Y-	X	Female_X0	0.00320416	0.63776	4.27098	0	NA
ACH-000544	OE21_OESOPHAGUS	1298359	Male	74	esophagus	NA	X	NA	0.284829	0.522674	-2.43997	NA	NA
ACH-000545	VMCUB1_URINARY_TRACT	909780	Male	NA	urinary_tract	Y-	X	Male_X0	0.0159844	0.704171	2.61309	NA	NA
ACH-000547	HT1197_URINARY_TRACT	907065	Male	44	urinary_tract	Y+	X	Male_XY	0.864733	0.690038	-9.65192	NA	NA
ACH-000548	BHY_UPPER_AERODIGESTIVE_TRACT	753535	Male	52	upper_aerodigestive	Y+	X	Male_XY	0.572418	0.624672	-7.41813	NA	NA
ACH-000549	SNU1076_UPPER_AERODIGESTIVE_TRACT	NA	Male	60	upper_aerodigestive	Y+	X	Male_XY	0.87642	0.661826	-9.93224	NA	NA
ACH-000550	IGR39_SKIN	NA	Male	26	skin	Y+	X	Male_XY	0.635216	0.689097	-9.58549	NA	NA
ACH-000542	HEYA8_OVARY	NA	Female	NA	ovary	Y-	X	Female_X0	0.00132977	0.616953	4.27353	0	NA
ACH-000552	HT29_LARGE_INTESTINE	905939	Female	44	colorectal	Y-	XX	Female_XXhet	0.011908	1.0125	4.10483	0.37107	NA
ACH-000556	SIHA_CERVIX	930297	Female	NA	cervix	Y-	XX	Female_XXhet	5.69557e-07	1.11208	4.55323	NA	NA
ACH-000551	K562_HAEMATOPOIETIC_AND_LYMPHOID_TISSUE	905940	Female	53	blood	Y-	X	Female_X0	0.000281602	0.730457	4.15013	0	NA
ACH-000559	NCIH1836_LUNG	1240182	Male	52	lung	NA	X	NA	0.0914427	0.793552	-0.923555	NA	NA
ACH-000563	EBC1_LUNG	753554	Male	69	lung	Y-	X	Male_X0	0.0179629	0.773054	3.98911	NA	NA
ACH-000567	ST486_HAEMATOPOIETIC_AND_LYMPHOID_TISSUE	910906	Female	NA	lymphocyte	Y-	XX	Female_XXhet	0.00817574	0.847367	2.83646	0.424326	NA
ACH-000570	YKG1_CENTRAL_NERVOUS_SYSTEM	687592	Female	NA	central_nervous_system	Y-	XX	Female_XXhet	0.00292171	0.963124	3.46717	0.34639	NA
ACH-000571	T98G_CENTRAL_NERVOUS_SYSTEM	687586	Male	61	central_nervous_system	Y+	X	Male_XY	0.657283	0.627349	-8.32982	NA	NA
ACH-000573	MDAMB436_BREAST	1240172	Female	43	breast	Y-	XX	Female_XXhet	4.48836e-06	1.09344	4.26194	0.250014	NA
ACH-000576	KMS27_HAEMATOPOIETIC_AND_LYMPHOID_TISSUE	NA	Male	52	plasma_cell	NA	X	NA	0.345942	0.5848	-0.321466	NA	NA
ACH-000577	JHH2_LIVER	1240157	Male	57	liver	Y+	XX	Male_XXY	1.0417	0.834195	-11.2191	NA	NA
ACH-000580	C32_SKIN	906830	Male	53	skin	Y+	X	Male_XY	NA	0.593008	-9.16157	NA	NA
ACH-000581	SNU16_STOMACH	908446	Female	33	gastric	Y-	XX	Female_XXhet	0.0359542	1.10179	4.3746	0.289011	NA
ACH-000583	MC116_HAEMATOPOIETIC_AND_LYMPHOID_TISSUE	907799	Male	NA	lymphocyte	Y+	X	Male_XY	0.52459	0.550451	-6.83053	NA	NA
ACH-000557	AML193_HAEMATOPOIETIC_AND_LYMPHOID_TISSUE	NA	Female	13	blood	Y-	X	Female_X0	0.00883862	0.630989	3.4954	0	NA
ACH-000585	EPLC272H_LUNG	753556	Male	57	lung	Y-	X	Male_X0	9.09689e-05	0.657411	3.99082	NA	NA
ACH-000587	NCIH1975_LUNG	924244	Female	NA	lung	Y-	XXhom	Female_XXhom	0.0172203	0.867974	4.31763	0	NA
ACH-000588	KMS26_HAEMATOPOIETIC_AND_LYMPHOID_TISSUE	NA	Male	50	plasma_cell	NA	X	NA	0.354615	0.649877	-2.52111	NA	NA
ACH-000589	NCIH1437_LUNG	687794	Male	60	lung	Y-	XX	Male_XX	0.00515307	0.85163	4.15744	NA	NA
ACH-000591	LN235_CENTRAL_NERVOUS_SYSTEM	NA	Male	38	central_nervous_system	Y+	X	Male_XY	0.760264	0.745271	-10.3107	NA	NA
ACH-000584	JHOS4_OVARY	1480359	Female	44	ovary	Y-	X	Female_X0	0.0179678	0.720077	3.84233	0	NA
ACH-000593	BC3C_URINARY_TRACT	NA	Female	82	urinary_tract	Y-	X	Female_X0	0.000228704	0.651756	4.0134	0	NA
ACH-000595	LN229_CENTRAL_NERVOUS_SYSTEM	1240169	Female	60	central_nervous_system	Y-	XX	Female_XXhet	0.0138	0.957324	4.1358	0.369581	NA
ACH-000596	LCLC97TM1_LUNG	946361	Male	44	lung	NA	X	NA	0.0645223	0.443712	-2.84777	NA	NA
ACH-000599	PATU8902_PANCREAS	1298526	Female	44	pancreas	Y-	X	Female_X0	0.000288574	0.638403	4.24214	0	NA
ACH-000601	MIAPACA2_PANCREAS	724870	Male	65	pancreas	Y-	XX	Male_XX	0.00289622	0.89299	4.22695	NA	NA
ACH-000602	M07E_HAEMATOPOIETIC_AND_LYMPHOID_TISSUE	NA	Female	0.5	blood	Y-	XX	Female_XXhet	0.0136575	0.948649	4.0215	0.452385	NA
ACH-000604	KYO1_HAEMATOPOIETIC_AND_LYMPHOID_TISSUE	NA	Male	22	blood	Y-	X	Male_X0	0.000184114	0.635616	3.20768	NA	NA
ACH-000605	TE6_OESOPHAGUS	946355	Male	NA	esophagus	Y-	X	Male_X0	3.38972e-05	0.470568	3.48348	NA	NA
ACH-000606	PECAPJ34CLONEC12_UPPER_AERODIGESTIVE_TRACT	NA	Male	60	upper_aerodigestive	Y-	X	Male_X0	1.5277e-05	0.546828	3.75007	NA	NA
ACH-000607	KYM1_SOFT_TISSUE	1240166	Male	1	soft_tissue	Y-	X	Male_X0	0.0153055	0.635994	4.13756	NA	NA
ACH-000608	COV644_OVARY	NA	Female	NA	ovary	Y-	XX	Female_XXhet	0.014655	0.898045	2.8708	0.16011	NA
ACH-000614	RVH421_SKIN	909706	Male	28	skin	Y+	X	Male_XY	0.437369	0.677828	-7.95552	NA	NA
ACH-000616	HS746T_STOMACH	1240151	Male	74	gastric	Y+	X	Male_XY	0.332487	0.695087	-5.75509	NA	NA
ACH-000618	SNU1041_UPPER_AERODIGESTIVE_TRACT	NA	Male	NA	upper_aerodigestive	Y-	X	Male_X0	0.000101925	0.609471	4.07086	NA	NA
ACH-000619	PECAPJ15_UPPER_AERODIGESTIVE_TRACT	1240207	Male	45	upper_aerodigestive	Y+	X	Male_XY	0.583378	0.603574	-6.44048	NA	NA
ACH-000620	JHH1_LIVER	1298151	Male	50	liver	Y-	X	Male_X0	0.00728425	0.651283	4.269	NA	NA
ACH-000621	MDAMB157_BREAST	925338	Female	44	breast	Y-	XX	Female_XXhet	0.0162581	1.32191	4.12251	0.312661	NA
ACH-000622	KNS42_CENTRAL_NERVOUS_SYSTEM	907282	Male	16	central_nervous_system	Y-	X	Male_X0	0.0075599	0.638191	3.31953	NA	NA
ACH-000623	SNU201_CENTRAL_NERVOUS_SYSTEM	NA	Male	58	central_nervous_system	Y+	X	Male_XY	0.620506	0.692214	-9.53261	NA	NA
ACH-000624	HCC1806_BREAST	907047	Female	60	breast	Y-	X	Female_X0	2.52255e-06	0.510731	3.9986	0	NA
ACH-000627	LCLC103H_LUNG	753586	Male	61	lung	Y+	X	Male_XY	0.396634	0.78036	-7.32712	NA	NA
ACH-000630	YD8_UPPER_AERODIGESTIVE_TRACT	NA	Female	46	upper_aerodigestive	Y-	XX	Female_XXhet	0.0311821	1.40119	3.54407	0.19172	NA
ACH-000632	HS944T_SKIN	NA	Male	51	skin	Y+	X	Male_XY	0.49506	0.780258	-8.01444	NA	NA
ACH-000633	FU97_STOMACH	1290806	Female	66	gastric	Y-	XX	Female_XXhet	0.0162159	0.9616	4.16951	0.150948	NA
ACH-000634	LN340_CENTRAL_NERVOUS_SYSTEM	NA	Male	NA	central_nervous_system	Y+	X	Male_XY	0.632406	0.702191	-9.67914	NA	NA
ACH-000637	KYSE520_OESOPHAGUS	753575	Female	58	esophagus	Y-	X	Female_X0	0.015746	0.642112	4.17718	0	NA
ACH-000638	NCIH441_LUNG	908460	Male	NA	lung	NA	X	NA	0.267574	0.621245	0.10537	NA	NA
ACH-000639	NCIH211_LUNG	1240189	Female	50	lung	Y-	XXhom	Female_XXhom	0.0161237	0.887355	4.17134	0	NA
ACH-000645	JL1_PLEURA	NA	Male	54	lung	Y+	X	Male_XY	0.599607	0.604793	-8.46569	NA	NA
ACH-000646	OVMANA_OVARY	NA	Female	51	ovary	Y-	X	Female_X0	0.00423601	0.61947	4.19132	0	NA
ACH-000647	TE1_OESOPHAGUS	753621	Male	NA	esophagus	Y-	X	Male_X0	0.00760525	0.769867	4.08261	NA	NA
ACH-000648	NCIH28_PLEURA	908470	Male	48	lung	Y+	X	Male_XY	0.579818	0.66521	-9.27267	NA	NA
ACH-000649	786O_KIDNEY	905947	Male	58	kidney	Y+	X	Male_XY	0.743627	0.667029	-10.4975	NA	NA
ACH-000651	SW620_LARGE_INTESTINE	905962	Male	51	colorectal	Y-	X	Male_X0	2.65102e-09	0.787692	4.23514	NA	NA
ACH-000652	SUIT2_PANCREAS	1240219	Male	73	pancreas	Y-	X	Male_X0	0.00614883	0.743342	2.71086	NA	NA
ACH-000653	JJN3_HAEMATOPOIETIC_AND_LYMPHOID_TISSUE	1327766	Female	57	plasma_cell	Y-	X	Female_X0	0.00039846	0.528416	4.1171	NA	NA
ACH-000654	RAJI_HAEMATOPOIETIC_AND_LYMPHOID_TISSUE	909262	Male	12	lymphocyte	Y+	X	Male_XY	0.565492	0.576297	-10.1458	NA	NA
ACH-000655	SF268_CENTRAL_NERVOUS_SYSTEM	905986	Miss_classification	NA	central_nervous_system	Y+	X	NA	0.455315	0.7544	-6.6921	NA	NA
ACH-000657	A2780_OVARY	906804	Female	NA	ovary	Y-	XX	Female_XXhet	0.0149392	1.06349	4.33643	0.33299	NA
ACH-000658	KMS18_HAEMATOPOIETIC_AND_LYMPHOID_TISSUE	NA	Male	58	plasma_cell	Y-	XX	Male_XX	0.118963	1.0189	NA	NA	NA
ACH-000661	WM1799_SKIN	NA	Male	NA	skin	Y+	X	Male_XY	0.845135	0.521994	-11.4635	NA	NA
ACH-000662	CORL23_LUNG	687780	Male	62	lung	Y-	XX	Male_XX	0.00738368	0.909488	3.50691	NA	NA
ACH-000663	OVTOKO_OVARY	1298365	Female	78	ovary	Y-	X	Female_X0	0.00558328	0.662452	4.28652	0	NA
ACH-000664	SUDHL1_HAEMATOPOIETIC_AND_LYMPHOID_TISSUE	909742	Male	10	lymphocyte	Y+	X	Male_XY	0.38921	0.719016	-7.59492	NA	NA
ACH-000665	SKMES1_LUNG	909728	Male	65	lung	NA	XX	NA	0.761791	0.831927	-2.83337	NA	NA
ACH-000667	HCC44_LUNG	1240145	Female	54	lung	Y-	X	Female_X0	0.0139256	0.698259	4.34429	0	NA
ACH-000671	HUH6_LIVER	NA	Male	NA	liver	Y+	X	Male_XY	0.74445	0.592472	-8.70153	NA	NA
ACH-000676	LN464_CENTRAL_NERVOUS_SYSTEM	NA	Male	NA	central_nervous_system	Y-	X	Male_X0	1.94727e-07	0.627621	4.36202	NA	NA
ACH-000677	SW1573_LUNG	724878	Female	44	lung	Y-	X	Female_X0	0.00318734	0.60872	2.75712	0	NA
ACH-000680	SW948_LARGE_INTESTINE	909757	Female	81	colorectal	Y-	XX	Female_XXhet	0.00635625	1.11135	4.16877	0.292103	NA
ACH-000681	A549_LUNG	905949	Male	52	lung	NA	XX	NA	0.00382459	0.838714	-8.3175	NA	NA
ACH-000682	SNU1066_UPPER_AERODIGESTIVE_TRACT	NA	Male	62	upper_aerodigestive	Y+	X	Male_XY	0.485184	0.690811	-7.60273	NA	NA
ACH-000683	SNU503_LARGE_INTESTINE	NA	Male	52	colorectal	Y-	X	Male_X0	0.000205982	0.515343	3.89127	NA	NA
ACH-000684	KMRC1_KIDNEY	1298168	Male	NA	kidney	Y-	X	Male_X0	7.0023e-07	0.599335	4.04458	NA	NA
ACH-000685	L33_PANCREAS	NA	Female	NA	pancreas	Y-	X	Female_X0	0.0218105	0.575347	4.35728	0	NA
ACH-000688	OV7_OVARY	1480360	Female	78	ovary	Y-	XX	Female_XXhet	0.012409	1.07865	4.04432	0.388822	NA
ACH-000693	KYSE180_OESOPHAGUS	907318	Male	53	esophagus	Y-	X	Male_X0	0.0149691	0.65485	4.33927	NA	NA
ACH-000694	TE9_OESOPHAGUS	946353	Male	NA	esophagus	Y-	X	Male_X0	0.000120143	0.632299	3.96997	NA	NA
ACH-000695	CORL47_LUNG	NA	Male	67	lung	Y+	X	Male_XY	0.607168	0.546056	-9.91529	NA	NA
ACH-000696	OVCAR8_OVARY	905991	Female	64	ovary	Y-	X	Female_X0	0.00266936	0.579981	4.17726	0	NA
ACH-000697	A3KAW_HAEMATOPOIETIC_AND_LYMPHOID_TISSUE	910935	Female	NA	lymphocyte	Y-	XXhom	Female_XXhom	0.0178397	0.831338	4.13669	0	NA
ACH-000698	DMS53_LUNG	907295	Male	54	lung	Y-	XX	Male_XX	0.0473826	0.850057	4.14859	NA	NA
ACH-000699	HCC1395_BREAST	749712	Female	43	breast	Y-	X	Female_X0	0.0192675	0.64098	3.99997	0	NA
ACH-000700	NCIH2882_LUNG	NA	Female	NA	lung	Y-	XX	Female_XXhet	0.000916203	1.10642	4.45618	NA	NA
ACH-000701	RMUGS_OVARY	NA	Female	62	ovary	Y-	XX	Female_XXhet	0.0121384	1.0085	4.20646	0.341637	NA
ACH-000702	L1236_HAEMATOPOIETIC_AND_LYMPHOID_TISSUE	1330935	Male	34	lymphocyte	NA	X	NA	0.16318	0.775517	-1.0064	NA	NA
ACH-000706	EKVX_LUNG	905970	Male	NA	lung	NA	X	NA	0.448005	0.663367	-3.36692	NA	NA
ACH-000709	KMRC2_KIDNEY	NA	Male	NA	kidney	Y-	X	Male_X0	0.0135431	0.646368	4.10775	NA	NA
ACH-000711	JIMT1_BREAST	1298157	Female	62	breast	Y-	NA	NA	0.0139646	0.808221	4.23234	0.0467274	NA
ACH-000713	CAOV3_OVARY	906825	Female	54	ovary	Y-	X	Female_X0	0.0101441	0.762564	4.17714	0	NA
ACH-000714	KMS11_HAEMATOPOIETIC_AND_LYMPHOID_TISSUE	1659817	Female	67	plasma_cell	Y-	X	Female_X0	0.0148235	0.779153	4.15157	0	NA
ACH-000716	TT2609C02_THYROID	1240223	Male	57	thyroid	Y+	X	Male_XY	0.647338	0.664826	-9.51752	NA	NA
ACH-000718	NCIH2291_LUNG	724874	Male	NA	lung	Y+	X	Male_XY	0.29975	0.65203	-5.55916	NA	NA
ACH-000719	RMGI_OVARY	909699	Female	34	ovary	Y-	X	Female_X0	0.00107254	0.628376	4.27591	0	NA
ACH-000720	TCCSUP_URINARY_TRACT	687459	Female	67	urinary_tract	Y-	X	Female_X0	0.000265211	0.659911	4.09562	0	NA
ACH-000721	HMC18_BREAST	NA	Female	35	breast	Y-	X	Female_X0	0.00265506	0.658178	4.16279	NA	NA
ACH-000724	HT1376_URINARY_TRACT	907066	Female	58	urinary_tract	Y-	X	Female_X0	0.00908688	0.77594	4.28314	0	NA
ACH-000725	HCC202_BREAST	1290906	Female	82	breast	Y-	XX	Female_XXhet	0.0136827	1.10759	4.07514	0.259692	NA
ACH-000732	PECAPJ41CLONED2_UPPER_AERODIGESTIVE_TRACT	NA	Female	67	upper_aerodigestive	Y-	XX	Female_XXhet	0.000273174	0.941462	4.09721	0.403596	NA
ACH-000734	JHH5_LIVER	NA	Male	50	liver	Y+	X	Male_XY	0.512774	0.540221	-9.06911	NA	NA
ACH-000735	PECAPJ49_UPPER_AERODIGESTIVE_TRACT	NA	Male	57	upper_aerodigestive	Y-	X	Male_X0	0.000257501	0.598349	4.05878	NA	NA
ACH-000736	SNU601_STOMACH	NA	Male	34	gastric	Y+	X	Male_XY	0.638764	0.688811	-7.3985	NA	NA
ACH-000738	GB1_CENTRAL_NERVOUS_SYSTEM	687568	Male	35	central_nervous_system	Y-	XX	Male_XX	0.011284	0.84262	1.93093	NA	NA
ACH-000739	HEPG2_LIVER	NA	Male	15	liver	Y+	X	Male_XY	0.50822	0.557325	-8.08764	NA	NA
ACH-000740	A253_SALIVARY_GLAND	906794	Male	54	upper_aerodigestive	Y-	X	Male_X0	0.000131983	0.670521	4.18086	NA	NA
ACH-000741	UBLC1_URINARY_TRACT	NA	Female	NA	urinary_tract	Y-	XX	Female_XXhet	0.000539472	0.976752	3.1279	NA	NA
ACH-000746	GSS_STOMACH	NA	Male	75	gastric	Y-	XX	Male_XX	0.0114107	0.834132	3.97829	NA	NA
ACH-000747	NCIH1703_LUNG	908474	Male	54	lung	Y+	X	Male_XY	0.487269	0.804081	-8.85056	NA	NA
ACH-000748	SJSA1_BONE	909717	Male	19	bone	Y+	X	Male_XY	0.588428	0.585152	-10.2662	NA	NA
ACH-000753	JMSU1_URINARY_TRACT	NA	Male	75	urinary_tract	Y-	X	Male_X0	0.000946871	0.514627	4.06048	NA	NA
ACH-000754	L428_HAEMATOPOIETIC_AND_LYMPHOID_TISSUE	907322	Female	37	lymphocyte	Y-	XX	Female_XXhet	0.000223836	0.970514	4.01967	0.418198	NA
ACH-000756	GI1_CENTRAL_NERVOUS_SYSTEM	906871	Male	61	central_nervous_system	Y+	X	Male_XY	0.660661	0.567611	-9.94216	NA	NA
ACH-000757	A427_LUNG	910851	Male	NA	lung	NA	X	NA	0.105432	0.721028	-2.15723	NA	NA
ACH-000758	MKN74_STOMACH	NA	Male	37	gastric	Y-	X	Male_X0	0.0181559	0.789914	4.15442	NA	NA
ACH-000762	YD38_UPPER_AERODIGESTIVE_TRACT	NA	Male	67	upper_aerodigestive	Y-	X	Male_X0	0.00831477	0.651923	2.7488	NA	NA
ACH-000763	MM1S_HAEMATOPOIETIC_AND_LYMPHOID_TISSUE	1659818	Female	NA	plasma_cell	Y-	XX	Female_XXhet	0.00512639	0.958131	4.47864	0.336884	NA
ACH-000765	WM983B_SKIN	NA	Male	NA	skin	Y+	X	Male_XY	0.4817	0.507179	-8.05946	NA	NA
ACH-000766	NCIH1648_LUNG	687799	Male	39	lung	Y+	X	Male_XY	0.540213	0.609954	-8.94288	NA	NA
ACH-000767	NCIH526_LUNG	688025	Male	55	lung	Y+	X	Male_XY	0.410296	0.787845	-7.64386	NA	NA
ACH-000768	MDAMB231_BREAST	905960	Female	51	breast	Y-	XX	Female_XXhet	0.00851819	0.863177	4.23765	0.11762	NA
ACH-000769	LK2_LUNG	687787	Male	NA	lung	Y-	X	Male_X0	0.0211178	0.546862	4.159	NA	NA
ACH-000770	P31FUJ_HAEMATOPOIETIC_AND_LYMPHOID_TISSUE	909253	Male	NA	blood	Y+	X	Male_XY	0.551659	0.561889	-9.27874	NA	NA
ACH-000771	BICR56_UPPER_AERODIGESTIVE_TRACT	NA	Female	NA	upper_aerodigestive	Y-	XX	Female_XXhet	0.00291912	0.966637	4.07663	0.419286	NA
ACH-000773	KIJK_HAEMATOPOIETIC_AND_LYMPHOID_TISSUE	NA	Male	15	lymphocyte	Y+	X	Male_XY	0.364247	0.611009	-7.4179	NA	NA
ACH-000774	RERFLCAD2_LUNG	NA	Male	NA	lung	Y+	X	Male_XY	0.624048	0.650996	-8.12843	NA	NA
ACH-000775	NCIH727_LUNG	724855	Female	65	lung	Y-	NA	NA	1.94935e-09	0.739979	4.00914	0.183531	NA
ACH-000776	ONS76_CENTRAL_NERVOUS_SYSTEM	909248	Female	2	central_nervous_system	Y-	X	Female_X0	0.0103986	0.775331	4.27374	0	NA
ACH-000777	KYSE30_OESOPHAGUS	NA	Male	64	esophagus	Y-	X	Male_X0	0.00889331	0.670553	3.41237	NA	NA
ACH-000778	HSC3_UPPER_AERODIGESTIVE_TRACT	907061	Male	64	upper_aerodigestive	Y+	X	Male_XY	0.483441	0.67518	-7.9461	NA	NA
ACH-000781	NCIH2023_LUNG	1240187	Male	26	lung	Y-	X	Male_X0	1.06924e-06	0.483715	3.83899	NA	NA
ACH-000782	SEM_HAEMATOPOIETIC_AND_LYMPHOID_TISSUE	NA	Female	5	blood	Y-	XX	Female_XXhet	0.00246715	0.910638	4.26692	0.393289	NA
ACH-000783	CAMA1_BREAST	946382	Female	51	breast	Y-	X	Female_X0	0.00654995	0.688675	4.10054	0	NA
ACH-000784	KYSE70_OESOPHAGUS	753576	Male	77	esophagus	Y-	XX	Male_XX	0.0019116	0.88533	4.14816	NA	NA
ACH-000785	NCIH2126_LUNG	NA	Male	65	lung	NA	X	NA	0.380669	0.715044	1.40915	NA	NA
ACH-000787	LXF289_LUNG	753592	Male	63	lung	NA	X	NA	0.419307	0.619404	-3.3741	NA	NA
ACH-000788	A2058_SKIN	906792	Male	43	skin	Y+	X	Male_XY	0.536072	0.55552	-8.98135	NA	NA
ACH-000790	SHP77_LUNG	724872	Male	54	lung	Y-	X	Male_X0	0.0192242	0.680721	4.13265	NA	NA
ACH-000791	RERFLCAD1_LUNG	NA	Male	70	lung	Y-	X	Male_X0	0.000491722	0.521472	3.98325	NA	NA
ACH-000792	BFTC909_KIDNEY	910698	Male	64	kidney	Y-	X	Male_X0	0.00951741	0.696551	4.10889	NA	NA
ACH-000793	KATOIII_STOMACH	907276	Male	55	gastric	Y-	XX	Male_XX	0.00334907	0.933529	4.16711	NA	NA
ACH-000794	BICR22_UPPER_AERODIGESTIVE_TRACT	1240121	Male	NA	upper_aerodigestive	Y-	X	Male_X0	3.13909e-08	0.533859	4.13454	NA	NA
ACH-000796	MCAS_OVARY	NA	Female	NA	ovary	Y-	X	Female_X0	0.000185829	0.653218	4.12964	0	NA
ACH-000799	HS695T_SKIN	NA	Male	26	skin	Y+	X	Male_XY	0.485977	0.662828	-9.0842	NA	NA
ACH-000800	NCIH446_LUNG	688023	Male	61	lung	Y+	X	Male_XY	0.30513	0.702974	-7.27819	NA	NA
ACH-000801	HS936T_SKIN	NA	Male	NA	skin	Y+	X	Male_XY	0.7257	0.713552	-10.3107	NA	NA
ACH-000802	BFTC905_URINARY_TRACT	910926	Female	51	urinary_tract	Y-	X	Female_X0	1.09019e-07	0.589047	4.17956	0	NA
ACH-000804	NB1_AUTONOMIC_GANGLIA	949179	Male	2	peripheral_nervous_system	Y-	X	Male_X0	1.96721e-05	0.751526	4.11821	NA	NA
ACH-000805	COLO679_SKIN	906818	Female	47	skin	Y-	XX	Female_XXhet	1.25961e-09	0.915414	3.89801	0.390025	NA
ACH-000807	SNU738_CENTRAL_NERVOUS_SYSTEM	NA	Male	40	central_nervous_system	Y-	X	Male_X0	0.00446312	0.7544	3.98667	NA	NA
ACH-000809	KYSE410_OESOPHAGUS	753574	Male	51	esophagus	Y-	X	Male_X0	0.0038765	0.61586	4.13368	NA	NA
ACH-000810	SKMEL30_SKIN	909726	Male	67	skin	NA	X	NA	0.550562	0.634559	-3.42889	NA	NA
ACH-000811	SKOV3_OVARY	905959	Female	64	ovary	Y-	XX	Female_XXhet	0.0146885	1.05103	4.01552	0.423868	NA
ACH-000814	HS939T_SKIN	1298144	Female	24	skin	Y-	XX	Female_XXhet	0.000270174	0.953537	4.05666	0.383554	NA
ACH-000817	RPMI8226_HAEMATOPOIETIC_AND_LYMPHOID_TISSUE	905964	Male	61	plasma_cell	Y+	X	Male_XY	0.451825	0.743717	-7.46256	NA	NA
ACH-000819	LN18_CENTRAL_NERVOUS_SYSTEM	1240168	Male	65	central_nervous_system	Y+	X	Male_XY	0.544176	0.705495	-8.64356	NA	NA
ACH-000820	SW403_LARGE_INTESTINE	NA	Female	51	colorectal	Y-	XX	Female_XXhet	4.98824e-06	1.1648	2.54944	0.431827	NA
ACH-000821	EJM_HAEMATOPOIETIC_AND_LYMPHOID_TISSUE	1297447	Female	58	plasma_cell	Y-	X	Female_X0	0.000927765	0.638413	4.24979	0	NA
ACH-000822	SKMEL24_SKIN	909725	Male	67	skin	Y+	X	Male_XY	0.623409	0.597589	-8.98863	NA	NA
ACH-000823	KYSE140_OESOPHAGUS	753573	Male	54	esophagus	Y-	X	Male_X0	0.000456236	0.557651	4.04834	NA	NA
ACH-000824	KYSE510_OESOPHAGUS	907321	Female	67	esophagus	Y-	X	Female_X0	0.000265798	0.586369	4.20546	0	NA
ACH-000826	CAL12T_LUNG	753540	Male	NA	lung	Y-	X	Male_X0	0.028869	0.574396	0.970853	NA	NA
ACH-000827	WM793_SKIN	1299081	Male	NA	skin	Y+	X	Male_XY	0.35908	0.555599	-7.83577	NA	NA
ACH-000829	HUNS1_HAEMATOPOIETIC_AND_LYMPHOID_TISSUE	NA	Male	NA	plasma_cell	Y+	X	Male_XY	0.6474	0.565352	-10.1191	NA	NA
ACH-000831	HEC50B_ENDOMETRIUM	NA	Female	NA	uterus	Y-	X	Female_X0	0.0100777	0.729555	4.07914	0	NA
ACH-000832	CAL27_UPPER_AERODIGESTIVE_TRACT	910916	Male	56	upper_aerodigestive	Y-	X	Male_X0	0.0427151	0.654802	3.60794	NA	NA
ACH-000833	RH30_SOFT_TISSUE	NA	Male	17	soft_tissue	Y+	X	Male_XY	0.228433	0.630909	-6.02071	NA	NA
ACH-000834	UMUC1_URINARY_TRACT	NA	Male	NA	urinary_tract	Y-	X	Male_X0	0.000171601	0.636071	3.18396	NA	NA
ACH-000835	GCT_SOFT_TISSUE	906999	Male	29	soft_tissue	Y-	X	Male_X0	0.000103373	0.482264	3.90746	NA	NA
ACH-000836	YD15_SALIVARY_GLAND	NA	Male	39	upper_aerodigestive	Y+	X	Male_XY	0.433746	0.677349	-7.05809	NA	NA
ACH-000837	NCIH322_LUNG	NA	Male	52	lung	Y+	X	Male_XY	0.456763	0.490597	-7.7782	NA	NA
ACH-000838	AMO1_HAEMATOPOIETIC_AND_LYMPHOID_TISSUE	1295741	Female	64	plasma_cell	Y-	X	Female_X0	0.00366669	0.622922	4.31164	0	NA
ACH-000839	SCABER_URINARY_TRACT	NA	Male	58	urinary_tract	Y+	X	Male_XY	0.380777	0.614791	-5.31062	NA	NA
ACH-000840	HCC366_LUNG	1240144	Female	80	lung	Y-	XX	Female_XXhet	0.00775548	0.965526	4.30825	0.135257	NA
ACH-000841	NCIH2087_LUNG	724834	Male	69	lung	Y-	X	Male_X0	1.20724e-05	0.460406	4.16861	NA	NA
ACH-000843	HARA_LUNG	1240142	Male	57	lung	Y+	X	Male_XY	0.687374	0.635975	-5.82365	NA	NA
ACH-000845	NCIH1373_LUNG	NA	Male	56	lung	Y-	X	Male_X0	0.0178619	0.694589	3.4933	NA	NA
ACH-000846	FADU_UPPER_AERODIGESTIVE_TRACT	906863	Male	56	upper_aerodigestive	Y-	X	Male_X0	0.0361283	0.663538	3.80725	NA	NA
ACH-000848	JHH7_LIVER	1240160	Male	53	liver	Y+	X	Male_XY	0.46077	0.739061	-7.78246	NA	NA
ACH-000849	MDAMB468_BREAST	908123	Female	51	breast	Y-	XXhom	Female_XXhom	0.00107906	0.827898	3.20686	0	NA
ACH-000853	NCIH661_LUNG	687829	Male	43	lung	Y+	X	Male_XY	0.637717	0.76811	-10.3226	NA	NA
ACH-000855	KYSE150_OESOPHAGUS	907317	Female	49	esophagus	Y-	X	Female_X0	5.64132e-09	0.637004	3.98005	0	NA
ACH-000856	CAL51_BREAST	910927	Female	45	breast	Y-	XX	Female_XXhet	0.0106944	1.0478	4.03557	0.399588	NA
ACH-000858	KNS62_LUNG	753569	Male	49	lung	Y-	X	Male_X0	0.00713368	0.584318	3.75325	NA	NA
ACH-000859	HCC1954_BREAST	749709	Female	61	breast	Y-	XX	Female_XXhet	0.00275503	0.983482	3.35687	0.127985	NA
ACH-000860	NCIH358_LUNG	908465	Male	NA	lung	Y+	X	Male_XY	0.428802	0.643845	-7.9372	NA	NA
ACH-000861	HOP62_LUNG	905972	Female	NA	lung	Y-	X	Female_X0	0.00712336	0.669074	4.27435	NA	NA
ACH-000865	KYSE450_OESOPHAGUS	907320	Male	59	esophagus	Y-	X	Male_X0	0.0095683	0.621596	4.2801	NA	NA
ACH-000866	NCIH1048_LUNG	687995	Female	NA	lung	Y-	XX	Female_XXhet	0.027169	1.02962	4.22323	0.415221	NA
ACH-000867	CHAGOK1_LUNG	687596	Male	45	lung	Y+	X	Male_XY	0.799108	0.575478	-9.50077	NA	NA
ACH-000869	NCIH1568_LUNG	1298348	Female	48	lung	Y-	X	Female_X0	0.0013673	0.724494	4.29898	0	NA
ACH-000872	HCC515_LUNG	NA	Female	NA	lung	Y-	XX	Female_XXhet	0.00384437	0.885075	4.26251	NA	NA
ACH-000873	KYSE270_OESOPHAGUS	907319	Male	79	esophagus	Y+	X	Male_XY	0.513319	0.715218	-6.63985	NA	NA
ACH-000876	MDAMB415_BREAST	924240	Female	38	breast	Y-	XX	Female_XXhet	0.000142287	1.12211	4.02646	0.4257	NA
ACH-000878	HCC15_LUNG	1240143	Male	47	lung	NA	X	NA	0.379761	0.707934	-1.52623	NA	NA
ACH-000880	AGS_STOMACH	906790	Female	54	gastric	Y-	XX	Female_XXhet	0.00460207	1.05459	4.1906	0.389337	NA
ACH-000881	MELJUSO_SKIN	908125	Female	58	skin	Y-	NA	NA	1.33811e-06	0.747548	3.85003	0.422379	NA
ACH-000882	IGR1_SKIN	907169	Male	42	skin	Y+	X	Male_XY	0.73593	0.57052	-9.73002	NA	NA
ACH-000885	TOV21G_OVARY	1240222	Female	62	ovary	Y-	XX	Female_XXhet	0.0134212	0.951871	4.19063	0.417282	NA
ACH-000886	NCIH2009_LUNG	724873	Female	68	lung	Y-	X	Female_X0	1.84026e-09	0.683596	4.29937	0	NA
ACH-000887	SF172_CENTRAL_NERVOUS_SYSTEM	NA	Female	NA	central_nervous_system	Y-	X	Female_X0	3.76855e-07	0.586337	4.12834	NA	NA
ACH-000888	NCIH1793_LUNG	908463	Female	52	lung	Y-	X	Female_X0	0.0331053	0.749404	4.19089	0	NA
ACH-000889	KMM1_HAEMATOPOIETIC_AND_LYMPHOID_TISSUE	NA	Male	62	plasma_cell	Y-	X	Male_X0	0.00734193	0.711435	4.04094	NA	NA
ACH-000890	SW1271_LUNG	1299062	Male	69	lung	Y-	X	Male_X0	0.00135622	0.545177	3.99712	NA	NA
ACH-000896	647V_URINARY_TRACT	906797	Male	NA	urinary_tract	Y+	XX	Male_XXY	0.917708	0.839579	-7.99158	NA	NA
ACH-000898	SNU719_STOMACH	NA	Male	53	gastric	Y+	X	Male_XY	0.527549	0.553795	-5.51731	NA	NA
ACH-000899	WM88_SKIN	NA	Male	NA	skin	Y+	XX	Male_XXY	0.52743	0.901545	-8.84043	NA	NA
ACH-000900	NCIH23_LUNG	905942	Male	51	lung	Y-	XX	Male_XX	0.0117355	0.843616	4.23146	NA	NA
ACH-000901	HCC1359_LUNG	NA	Female	55	lung	Y-	XX	Female_XXhet	0.144524	0.865593	4.00228	NA	NA
ACH-000903	FTC133_THYROID	906864	Male	42	thyroid	Y-	X	Male_X0	0.000222419	0.723919	4.1251	NA	NA
ACH-000905	5637_URINARY_TRACT	687452	Male	68	urinary_tract	Y+	X	Male_XY	0.375602	0.717558	-5.77103	NA	NA
ACH-000906	ES2_OVARY	1240128	Female	47	ovary	Y-	XXhom	Female_XXhom	0.00785759	0.896207	4.28021	0	NA
ACH-000907	SNU349_KIDNEY	NA	Male	68	kidney	Y+	X	Male_XY	0.408454	0.694544	-7.83703	NA	NA
ACH-000910	MDAMB453_BREAST	908122	Female	48	breast	Y-	XX	Female_XXhet	0.0101168	0.979802	4.16451	0.311	NA
ACH-000911	NUGC3_STOMACH	908455	Male	72	gastric	Y-	XX	Male_XX	0.0137606	0.95687	4.04211	NA	NA
ACH-000912	NCIH2286_LUNG	NA	Female	57	lung	Y-	X	Female_X0	0.00240366	0.67456	4.20986	0	NA
ACH-000913	ESS1_ENDOMETRIUM	907000	Female	76	uterus	Y-	XX	Female_XXhet	0.0091997	1.04563	3.85434	0.436294	NA
ACH-000914	HT_HAEMATOPOIETIC_AND_LYMPHOID_TISSUE	907063	Male	70	lymphocyte	Y+	X	Male_XY	0.618353	0.584545	-10.1819	NA	NA
ACH-000915	IPC298_SKIN	907171	Female	64	skin	Y-	X	Female_X0	0.00082923	0.618995	4.10824	0	NA
ACH-000916	NCIH1573_LUNG	908472	Female	35	lung	Y-	X	Female_X0	2.13346e-09	0.571532	4.24387	0	NA
ACH-000917	TE4_OESOPHAGUS	1503371	Female	NA	esophagus	NA	X	Female_X0	0.173872	0.530219	-3.15479	0	NA
ACH-000921	NCIH1339_LUNG	NA	Female	49	lung	NA	X	Female_X0	1.00494	0.763872	-1.09005	0	NA
ACH-000922	RCHACV_HAEMATOPOIETIC_AND_LYMPHOID_TISSUE	1330994	Female	8	blood	Y-	XX	Female_XXhet	1.86195e-05	0.828026	4.22035	0.403997	NA
ACH-000924	NCIH2172_LUNG	1298353	Female	NA	lung	Y-	XXhom	Female_XXhom	0.00317918	0.836625	4.05602	0	NA
ACH-000928	JHUEM1_ENDOMETRIUM	NA	Female	56	uterus	Y-	XX	Female_XXhet	0.00390547	1.05534	4.33343	0.35727	NA
ACH-000932	SNU1_STOMACH	908444	Male	44	gastric	Y+	X	Male_XY	0.564569	0.585136	-9.61532	NA	NA
ACH-000936	EFO27_OVARY	906852	Female	36	ovary	Y-	XX	Female_XXhet	0.00749913	1.06085	4.19458	0.445742	NA
ACH-000937	PF382_HAEMATOPOIETIC_AND_LYMPHOID_TISSUE	909260	Female	6	blood	Y-	NA	NA	4.01373e-06	0.775284	3.35335	0.370612	NA
ACH-000938	NALM6_HAEMATOPOIETIC_AND_LYMPHOID_TISSUE	908158	Male	19	blood	Y+	X	Male_XY	0.599045	0.569574	-9.39171	NA	NA
ACH-000939	SKUT1_SOFT_TISSUE	909732	Female	75	soft_tissue	Y-	XX	Female_XXhet	0.0133574	1.0506	4.0004	0.387448	NA
ACH-000941	HEC1B_ENDOMETRIUM	NA	Female	71	uterus	Y-	X	Female_X0	3.35477e-05	0.584319	4.21239	0	NA
ACH-000944	NAMALWA_HAEMATOPOIETIC_AND_LYMPHOID_TISSUE	908159	Female	3	lymphocyte	Y-	X	Female_X0	6.20001e-05	0.589545	4.21615	0	NA
ACH-000946	HEC265_ENDOMETRIUM	NA	Female	NA	uterus	Y-	XX	Female_XXhet	0.00747345	0.939422	4.2056	0.342496	NA
ACH-000947	OVK18_OVARY	1480371	Female	NA	ovary	Y-	XX	Female_XXhet	0.00576427	1.03694	3.70369	0.322052	NA
ACH-000948	2313287_STOMACH	910924	Male	72	gastric	Y+	X	Male_XY	0.502455	0.569586	-8.47349	NA	NA
ACH-000950	LOVO_LARGE_INTESTINE	907790	Male	56	colorectal	Y+	X	Male_XY	0.572059	0.554544	-8.39389	NA	NA
ACH-000953	SUPT1_HAEMATOPOIETIC_AND_LYMPHOID_TISSUE	909743	Male	8	blood	Y+	X	Male_XY	0.287723	0.581373	-8.23512	NA	NA
ACH-000957	LS180_LARGE_INTESTINE	998189	Female	58	colorectal	Y-	X	Female_X0	0.00421369	0.636192	4.27325	0	NA
ACH-000958	SW48_LARGE_INTESTINE	909751	Female	82	colorectal	Y-	XX	Female_XXhet	0.012435	1.02192	2.48478	0.440245	NA
ACH-000959	SNUC4_LARGE_INTESTINE	NA	Male	35	colorectal	Y+	X	Male_XY	0.657628	0.582809	-9.09665	NA	NA
ACH-000960	REH_HAEMATOPOIETIC_AND_LYMPHOID_TISSUE	909696	Female	15	blood	Y-	X	Female_X0	0.000262678	0.537157	4.15945	0	NA
ACH-000961	ISHIKAWAHERAKLIO02ER_ENDOMETRIUM	NA	Female	39	uterus	Y-	X	Female_X0	0.00189966	0.743191	4.20736	0	NA
ACH-000963	CCK81_LARGE_INTESTINE	1240123	Female	NA	colorectal	Y-	XX	Female_XXhet	0.00240503	1.0685	4.23343	0.283514	NA
ACH-000965	RL952_ENDOMETRIUM	930082	Female	65	uterus	Y-	XX	Female_XXhet	0.0139816	1.03813	4.0228	0.409666	NA
ACH-000968	COLO792_SKIN	906814	Male	62	skin	Y+	X	Male_XY	0.705126	0.643356	-7.46268	NA	NA
ACH-000973	639V_URINARY_TRACT	906798	Male	69	urinary_tract	Y-	XX	Male_XX	0.000682195	0.845306	4.19358	NA	NA
ACH-000974	SNGM_ENDOMETRIUM	909735	Female	52	uterus	Y-	XX	Female_XXhet	0.00702902	1.04851	4.17563	0.364428	NA
ACH-000975	HCC2450_LUNG	NA	Male	52	lung	NA	X	NA	0.256847	0.580969	-3.91286	NA	NA
ACH-000976	HUCCT1_BILIARY_TRACT	907069	Male	NA	bile_duct	Y+	X	Male_XY	0.692488	0.786679	-6.60844	NA	NA
ACH-000977	LNCAPCLONEFGC_PROSTATE	907788	Male	50	prostate	Y+	X	Male_XY	0.617495	0.61322	-11.1645	NA	NA
ACH-000978	EN_ENDOMETRIUM	1240127	Female	50	uterus	Y-	XX	Female_XXhet	0.00664952	0.899718	4.00864	0.320563	NA
ACH-000980	NCIH1155_LUNG	908467	Male	36	lung	Y-	XX	Male_XX	2.06087e-09	0.844558	4.15026	NA	NA
ACH-000983	KCL22_HAEMATOPOIETIC_AND_LYMPHOID_TISSUE	1330931	Female	32	blood	Y-	NA	NA	4.7179e-05	0.804783	4.17067	0.242742	NA
ACH-000984	HEC6_ENDOMETRIUM	NA	Female	NA	uterus	Y-	X	Female_X0	0.00395849	0.638531	3.5032	0	NA
ACH-000988	MFE319_ENDOMETRIUM	1240174	Female	81	uterus	Y-	X	Female_X0	0.00827411	0.633399	4.32722	0	NA
ACH-000993	JHUEM7_ENDOMETRIUM	NA	Female	58	uterus	Y-	XX	Female_XXhet	0.00517174	0.921707	4.22729	0.289412	NA
ACH-000994	HEC59_ENDOMETRIUM	NA	Female	NA	uterus	Y-	XXhom	Female_XXhom	0.00103665	0.810668	4.16001	0	NA
ACH-000995	JURKAT_HAEMATOPOIETIC_AND_LYMPHOID_TISSUE	998184	Male	NA	blood	Y+	X	Male_XY	0.297345	0.592815	-6.84535	NA	NA
ACH-000996	HEC251_ENDOMETRIUM	NA	Female	NA	uterus	Y-	X	Female_X0	0.000125289	0.647258	4.09259	0	NA
ACH-001001	143B_BONE	NA	Female	13	bone	Y-	X	Female_X0	0.00114934	0.626841	4.22402	0	NA
ACH-001020	BT16_SOFT_TISSUE	NA	Male	2	soft_tissue	Y+	X	Male_XY	0.667817	0.590647	-9.13397	NA	NA
ACH-001028	CHLA06ATRT_SOFT_TISSUE	NA	Female	0.33	soft_tissue	Y-	XX	Female_XXhet	2.59418e-07	0.815688	4.42188	NA	NA
ACH-001029	CHLA10_BONE	NA	Female	14	bone	Y-	XX	Female_XXhet	0.00120627	1.32183	4.54727	NA	NA
ACH-001031	CHLA266_SOFT_TISSUE	NA	Female	2.5	soft_tissue	Y-	XX	Female_XXhet	1.06596e-05	0.971673	4.42495	NA	NA
ACH-001036	CMK115_HAEMATOPOIETIC_AND_LYMPHOID_TISSUE	NA	Male	NA	blood	Y+	X	Male_XY	0.662545	0.672141	-9.00818	NA	NA
ACH-001038	COGE352_BONE	NA	Male	17	bone	Y+	XX	Male_XXY	0.874888	0.868496	-10.1682	NA	NA
ACH-001041	COLO699_LUNG	NA	Female	57	lung	Y-	XX	Female_XXhet	1.13819e-06	0.874127	4.25182	0.395293	NA
ACH-001048	COV504_OVARY	NA	Female	NA	ovary	Y-	X	Female_X0	0.00444318	0.699268	4.39471	0	NA
ACH-001061	DLD1_LARGE_INTESTINE	NA	Male	NA	colorectal	NA	X	NA	0.569642	0.534552	-2.56742	NA	NA
ACH-001067	F5_CENTRAL_NERVOUS_SYSTEM	NA	Male	NA	central_nervous_system	Y-	XX	Male_XX	0.000262773	0.965368	3.76884	NA	NA
ACH-001075	NCIH292_LUNG	753604	Female	32	lung	Y-	XX	Female_XXhet	4.15702e-07	0.887188	4.1708	0.465441	NA
ACH-001098	KCIMOH1_PANCREAS	NA	Female	64	pancreas	Y-	X	Female_X0	5.94437e-08	0.465567	4.55323	0	NA
ACH-001128	MON_SOFT_TISSUE	NA	Male	NA	soft_tissue	Y-	X	Male_X0	1.18403e-06	0.592106	4.3053	NA	NA
ACH-001129	MONOMAC1_HAEMATOPOIETIC_AND_LYMPHOID_TISSUE	NA	Male	64	blood	Y+	X	Male_XY	0.456933	0.574724	-8.64909	NA	NA
ACH-001145	OC316_OVARY	NA	Female	60	ovary	Y-	XX	Female_XXhet	1.98854e-05	0.884487	4.55323	0.187539	NA
ACH-001151	OVCAR5_OVARY	905969	Female	NA	ovary	Y-	X	Female_X0	1.93123e-09	0.439052	4.53492	NA	NA
ACH-001163	PEDS005TSUSP_KIDNEY	NA	Male	NA	kidney	NA	XX	NA	0.287677	0.871242	4.55323	NA	NA
ACH-001172	U251MGDM_Brain	NA	Male	NA	central_nervous_system	Y-	X	Male_X0	6.51474e-08	0.659557	4.55323	NA	NA
ACH-001183	RT11284_URINARY_TRACT	NA	Female	NA	urinary_tract	Y-	XX	Female_XXhet	7.69372e-05	0.8906	4.50032	NA	NA
ACH-001184	SCMCRM2_SOFT_TISSUE	NA	Female	11	soft_tissue	Y-	X	Female_X0	5.88412e-08	0.665091	4.25466	NA	NA
ACH-001188	SHSY5Y_AUTONOMIC_GANGLIA	NA	Female	4	peripheral_nervous_system	Y-	XX	Female_XXhet	0.00521034	1.01211	4.55323	0.429136	NA
ACH-001190	SKMEL2_SKIN	905955	Male	60	skin	Y+	X	Male_XY	0.540506	0.770115	-8.69705	NA	NA
ACH-001192	SKNEP1_BONE	NA	Female	NA	bone	Y-	X	Female_X0	0.000417038	0.733672	4.49013	NA	NA
ACH-001193	SKPNDW_BONE	909731	Male	NA	bone	Y-	X	Male_X0	0.00158498	0.620377	4.21128	NA	NA
ACH-001196	SMSCTR_SOFT_TISSUE	NA	Male	1	soft_tissue	Y+	X	Male_XY	0.460844	0.652028	-8.0218	NA	NA
ACH-001197	SMZ1_HAEMATOPOIETIC_AND_LYMPHOID_TISSUE	NA	Male	NA	lymphocyte	Y+	X	Male_XY	0.992878	0.585881	-11.7586	NA	NA
ACH-001205	TC32_BONE	NA	Female	17	bone	Y-	XX	Female_XXhet	0.000171281	0.932122	NA	NA	NA
ACH-001211	TTC549_SOFT_TISSUE	NA	Female	NA	soft_tissue	Y-	XX	Female_XXhet	0.000189101	0.960713	4.33979	NA	NA
ACH-001212	TTC642_SOFT_TISSUE	NA	Female	NA	soft_tissue	Y-	XX	Female_XXhet	0.000258448	0.945672	NA	NA	NA
ACH-001228	UPCISCC152_UPPER_AERODIGESTIVE_TRACT	NA	Male	NA	upper_aerodigestive	NA	X	NA	0.363303	0.708458	1.01425	NA	NA
ACH-001229	UPCISCC154_UPPER_AERODIGESTIVE_TRACT	NA	Male	54	upper_aerodigestive	Y+	X	Male_XY	0.381268	0.550386	-6.09627	NA	NA
ACH-001232	UW228_CENTRAL_NERVOUS_SYSTEM	NA	Miss_classification	NA	central_nervous_system	Y+	XX	NA	0.525806	0.835205	-8.50254	NA	NA
ACH-001239	WM2664_SKIN	NA	Female	58	skin	Y-	X	Female_X0	0.00983023	0.697938	2.53577	0	NA
ACH-001274	SW982_SOFT_TISSUE	909759	Female	NA	soft_tissue	Y-	XX	Female_XXhet	0.000870433	1.00112	4.3728	NA	NA
ACH-001275	SYO1_SOFT_TISSUE	NA	Female	NA	soft_tissue	Y-	X	Female_X0	8.0735e-10	0.574823	4.25651	NA	NA
ACH-001278	BIN67_OVARY	NA	Female	NA	ovary	Y-	XX	Female_XXhet	1.10976e-06	0.994199	4.50353	NA	NA
ACH-001283	TC106_BONE	NA	Male	19	bone	Y+	X	Male_XY	0.470089	0.552346	-7.778	NA	NA
ACH-001289	COGAR359_SOFT_TISSUE	NA	Male	NA	soft_tissue	Y+	X	Male_XY	0.63465	0.585897	-10.0662	NA	NA
ACH-001295	Y79_AUTONOMIC_GANGLIA	NA	Female	2.5	eye	Y-	X	Female_X0	1.90769e-09	0.741997	4.48497	NA	NA
ACH-001300	CHLA15_AUTONOMIC_GANGLIA	NA	Female	1.5	peripheral_nervous_system	Y-	XX	Female_XXhet	2.65339e-06	0.883428	4.32364	NA	NA
ACH-001303	NB1643_AUTONOMIC_GANGLIA	NA	Male	3	peripheral_nervous_system	Y+	X	Male_XY	0.548127	0.537329	-8.08274	NA	NA
ACH-001306	8305C_THYROID	906795	Female	67	thyroid	Y-	XX	Female_XXhet	0.0282754	1.03092	4.15755	0.319647	NA
ACH-001307	8505C_THYROID	924102	Female	78	thyroid	Y-	X	Female_X0	0.00236317	0.75819	3.88701	0	NA
ACH-001318	PLCPRF5_LIVER	NA	Male	24	liver	Y-	XX	Male_XX	0.0166132	0.926813	4.26119	NA	NA
ACH-001328	A431_SKIN	910925	Female	85	skin	Y-	XX	Female_XXhet	8.13557e-09	0.810441	4.32468	NA	NA
ACH-001329	ANGMCSS_CENTRAL_NERVOUS_SYSTEM	NA	Male	65	central_nervous_system	Y+	X	Male_XY	0.606481	0.563347	-7.70175	NA	NA
ACH-001332	BICR78_UPPER_AERODIGESTIVE_TRACT	1240122	Male	NA	upper_aerodigestive	Y-	X	Male_X0	5.7657e-08	0.693133	4.48207	NA	NA
ACH-001333	C33A_CERVIX	687505	Female	66	cervix	Y-	XX	Female_XXhet	0.00170747	0.914321	4.48773	NA	NA
ACH-001334	C4I_CERVIX	687506	Female	41	cervix	Y-	XX	Female_XXhet	0.00139179	0.979671	4.55323	NA	NA
ACH-001335	C4II_CERVIX	NA	Female	41	cervix	Y-	XX	Female_XXhet	2.27972e-07	0.927395	4.54272	NA	NA
ACH-001336	CASKI_CERVIX	906824	Female	40	cervix	Y-	X	Female_X0	4.19207e-09	0.671402	4.45546	NA	NA
ACH-001338	CHP134_AUTONOMIC_GANGLIA	910941	Male	1.5	peripheral_nervous_system	Y+	X	Male_XY	0.573237	0.571226	-8.8836	NA	NA
ACH-001340	COV413A_OVARY	NA	Female	NA	ovary	Y-	X	Female_X0	3.09261e-08	0.598191	4.46562	NA	NA
ACH-001341	DOTC24510_CERVIX	906843	Female	NA	cervix	Y-	XX	Female_XXhet	4.8413e-07	0.996775	4.51435	NA	NA
ACH-001344	GIMEN_AUTONOMIC_GANGLIA	906872	Male	4	peripheral_nervous_system	Y-	X	Male_X0	0.000429338	0.608664	4.41652	NA	NA
ACH-001345	GP5D_LARGE_INTESTINE	907291	Female	71	colorectal	Y-	XX	Female_XXhet	7.85868e-06	0.920608	4.44981	NA	NA
ACH-001346	H103_UPPER_AERODIGESTIVE_TRACT	NA	Male	32	upper_aerodigestive	NA	X	NA	0.122783	0.581956	-5.58913	NA	NA
ACH-001347	H157_UPPER_AERODIGESTIVE_TRACT	NA	Male	84	upper_aerodigestive	Y+	X	Male_XY	0.361837	0.573753	-6.03904	NA	NA
ACH-001353	JOPACA1_PANCREAS	NA	Male	46	pancreas	Y-	X	Male_X0	3.31608e-09	0.493832	4.48487	NA	NA
ACH-001354	LAN2_AUTONOMIC_GANGLIA	NA	Female	3	peripheral_nervous_system	Y-	XX	Female_XXhet	8.4842e-10	0.839915	4.43127	NA	NA
ACH-001356	MB1_THYROID	NA	Male	57	thyroid	Y-	X	Male_X0	6.53752e-08	0.603478	4.4237	NA	NA
ACH-001360	MS751_CERVIX	1240179	Female	47	cervix	Y-	XX	Female_XXhet	2.79367e-07	1.07525	4.50545	NA	NA
ACH-001366	NGP_AUTONOMIC_GANGLIA	NA	Male	1.5	peripheral_nervous_system	Y+	X	Male_XY	0.559547	0.538313	-8.3323	NA	NA
ACH-001368	OACM51_OESOPHAGUS	1503363	Female	47	esophagus	Y-	XX	Female_XXhet	0.000425435	0.96274	3.9428	NA	NA
ACH-001370	OCIP5X_OVARY	NA	Female	NA	ovary	Y-	X	Female_X0	5.44066e-06	0.797908	4.55323	NA	NA
ACH-001374	PA1_OVARY	909255	Female	12	ovary	Y-	XX	Female_XXhet	1.32144e-07	0.91674	4.30422	NA	NA
ACH-001375	PACADD119_PANCREAS	NA	Male	59	pancreas	Y-	X	Male_X0	1.62705e-09	0.385334	4.39083	NA	NA
ACH-001377	PACADD137_PANCREAS	NA	Female	75	pancreas	Y-	XX	Female_XXhet	2.08488e-07	0.935759	4.46785	NA	NA
ACH-001379	PACADD161_PANCREAS	NA	Female	63	pancreas	Y-	X	Female_X0	9.72351e-06	0.460251	4.40877	NA	NA
ACH-001380	PACADD165_PANCREAS	NA	Male	54	pancreas	Y-	XX	Male_XX	9.38417e-07	0.839563	4.5259	NA	NA
ACH-001382	PACADD188_PANCREAS	NA	Female	68	pancreas	Y-	XX	Female_XXhet	1.64183e-06	0.849989	4.52337	NA	NA
ACH-001385	RPMI2650_UPPER_AERODIGESTIVE_TRACT	909700	Male	52	upper_aerodigestive	NA	X	NA	0.605928	0.585179	-1.99065	NA	NA
ACH-001386	SCLC22H_LUNG	NA	Male	46	lung	Y+	X	Male_XY	0.437164	0.557542	-8.70561	NA	NA
ACH-001388	SUM102PT_BREAST	NA	Female	NA	breast	Y-	XX	Female_XXhet	0.000152547	0.849823	4.55323	NA	NA
ACH-001389	SUM1315MO2_BREAST	NA	Female	NA	breast	Y-	X	Female_X0	4.03399e-05	0.796759	4.55135	NA	NA
ACH-001390	SUM149PT_BREAST	NA	Female	NA	breast	Y-	X	Female_X0	2.69094e-05	0.669134	4.43823	NA	NA
ACH-001391	SUM159PT_BREAST	NA	Female	NA	breast	Y-	XX	Female_XXhet	6.74023e-06	0.823556	4.41412	NA	NA
ACH-001394	SUM229PE_BREAST	NA	Female	NA	breast	Y-	X	Female_X0	2.36052e-06	0.763123	4.36659	NA	NA
ACH-001396	SUM52PE_BREAST	NA	Female	NA	breast	Y-	XX	Female_XXhet	1.7881e-08	0.844767	4.55323	NA	NA
ACH-001398	SW156_KIDNEY	1240220	Male	75	kidney	Y-	XX	Male_XX	0.00676018	0.825897	4.55323	NA	NA
ACH-001400	SW954_CERVIX	924247	Female	86	cervix	Y-	XX	Female_XXhet	0.00256495	1.09164	4.55323	NA	NA
ACH-001402	SW756_CERVIX	724839	Female	46	cervix	Y-	XX	Female_XXhet	0.000303316	1.24452	4.49935	NA	NA
ACH-001403	TO14_OVARY	NA	Female	NA	ovary	Y-	X	Female_X0	7.64223e-07	0.717926	4.51696	NA	NA
ACH-001407	UMUC13_URINARY_TRACT	NA	Male	NA	urinary_tract	Y+	X	Male_XY	1.07464	0.551349	-10.8022	NA	NA
ACH-001408	UMUC14_URINARY_TRACT	NA	Male	NA	urinary_tract	NA	X	NA	0.429121	0.57115	-2.56512	NA	NA
ACH-001411	UMUC5_URINARY_TRACT	NA	Female	NA	urinary_tract	Y-	X	Female_X0	1.32264e-05	0.627683	4.53914	NA	NA
ACH-001413	UMUC11_URINARY_TRACT	NA	Male	NA	urinary_tract	NA	X	NA	0.182747	0.697269	-0.842446	NA	NA
ACH-001414	UMUC6_URINARY_TRACT	NA	Male	NA	urinary_tract	Y+	X	Male_XY	0.564668	0.522467	-7.99658	NA	NA
ACH-001415	UMUC7_URINARY_TRACT	NA	Male	NA	urinary_tract	Y+	X	Male_XY	1.01364	0.75967	-9.27244	NA	NA
ACH-001416	UMUC9_URINARY_TRACT	NA	Male	NA	urinary_tract	Y-	X	Male_X0	1.79431e-06	0.675995	4.44862	NA	NA
ACH-001418	UWB1289_OVARY	1480374	Female	56	ovary	Y-	X	Female_X0	8.23513e-06	0.566347	4.54168	NA	NA
ACH-001419	VP229_BREAST	NA	Female	47	breast	Y-	X	Female_X0	6.159e-06	0.755311	4.55323	NA	NA
ACH-001421	WERIRB1_AUTONOMIC_GANGLIA	NA	Female	1	eye	Y-	XX	Female_XXhet	7.63353e-07	0.878782	4.55323	NA	NA
ACH-001422	WPE1NA22_PROSTATE	NA	Male	54	prostate	Y-	X	Male_X0	0.0357793	0.622238	4.55323	NA	NA
ACH-001430	TC138_BONE	NA	Male	NA	bone	Y+	X	Male_XY	0.569578	0.520037	-8.91038	NA	NA
ACH-001442	A388_SKIN	910697	Male	86	epidermoid_carcinoma	Y-	X	Male_X0	0.00034399	0.531661	4.55323	NA	NA
ACH-001443	ASH3_THYROID	1290722	Female	68	thyroid	Y-	X	Female_X0	0.000253508	0.727199	4.55323	NA	NA
ACH-001450	BLUE1_HAEMATOPOIETIC_AND_LYMPHOID_TISSUE	NA	Male	29	lymphocyte	Y+	X	Male_XY	0.661817	0.550061	-7.80514	NA	NA
ACH-001451	BOKU_CERVIX	NA	Female	NA	cervix	Y-	XX	Female_XXhet	1.70425e-06	1.08609	4.55323	NA	NA
ACH-001453	BPH1_PROSTATE	924105	Male	68	prostate	Y+	X	Male_XY	0.704084	0.644192	-9.43234	NA	NA
ACH-001454	C10_LARGE_INTESTINE	NA	Male	71	colorectal	Y+	X	Male_XY	0.638644	0.756639	-7.11138	NA	NA
ACH-001458	C75_LARGE_INTESTINE	NA	Male	56	colorectal	NA	X	NA	0.711031	0.703116	-1.1887	NA	NA
ACH-001459	C80_LARGE_INTESTINE	NA	Male	69	colorectal	NA	X	NA	0.67272	0.615839	-0.874273	NA	NA
ACH-001460	C84_LARGE_INTESTINE	NA	Male	67	colorectal	Y-	X	Male_X0	0.00312003	0.716673	4.31558	NA	NA
ACH-001461	C99_LARGE_INTESTINE	NA	Male	69	colorectal	Y-	X	Male_X0	0.00256708	0.685513	4.44594	NA	NA
ACH-001484	CI_HAEMATOPOIETIC_AND_LYMPHOID_TISSUE	NA	Female	47	blood	Y-	XX	Female_XXhet	2.26842e-07	0.90982	4.53256	NA	NA
ACH-001485	CII_HAEMATOPOIETIC_AND_LYMPHOID_TISSUE	NA	Female	47	blood	Y-	XX	Female_XXhet	1.0844e-09	1.09152	4.52783	NA	NA
ACH-001494	EGI1_BILIARY_TRACT	906853	Male	52	bile_duct	Y+	X	Male_XY	0.714753	0.394093	-7.457	NA	NA
ACH-001495	EMTOKA_ENDOMETRIUM	NA	Female	64	uterus	Y-	X	Female_X0	1.47418e-06	0.671671	4.55323	NA	NA
ACH-001496	ESO26_OESOPHAGUS	1503366	Male	56	esophagus	Y+	X	Male_XY	0.614197	0.592956	-9.11682	NA	NA
ACH-001498	FARAGE_HAEMATOPOIETIC_AND_LYMPHOID_TISSUE	1297449	Female	NA	lymphocyte	Y-	XX	Female_XXhet	3.95325e-06	0.924878	4.55323	NA	NA
ACH-001500	FLO1_OESOPHAGUS	1503361	Male	NA	esophagus	Y-	X	Male_X0	4.67673e-07	0.647704	4.31403	NA	NA
ACH-001509	H357_UPPER_AERODIGESTIVE_TRACT	NA	Male	74	upper_aerodigestive	Y+	X	Male_XY	0.359415	0.592639	-5.10914	NA	NA
ACH-001510	H376_UPPER_AERODIGESTIVE_TRACT	NA	Female	40	upper_aerodigestive	Y-	XX	Female_XXhet	1.59349e-05	1.02555	4.55323	NA	NA
ACH-001511	H413_UPPER_AERODIGESTIVE_TRACT	NA	Female	53	upper_aerodigestive	Y-	XX	Female_XXhet	7.33406e-07	1.49801	4.55323	NA	NA
ACH-001513	HCA1_CERVIX	NA	Female	NA	cervix	Y-	XX	Female_XXhet	1.7974e-05	0.979256	4.55084	NA	NA
ACH-001515	HCS2_CERVIX	NA	Female	42	cervix	Y-	X	Female_X0	3.14653e-06	0.683881	4.54933	NA	NA
ACH-001517	HEC1_ENDOMETRIUM	907051	Female	71	uterus	Y-	X	Female_X0	1.57183e-05	0.739992	4.55323	NA	NA
ACH-001518	HEC116_ENDOMETRIUM	NA	Female	NA	uterus	Y-	X	Female_X0	5.6303e-07	0.550364	4.55323	NA	NA
ACH-001520	HG3_HAEMATOPOIETIC_AND_LYMPHOID_TISSUE	NA	Male	70	blood	Y+	X	Male_XY	0.631555	0.546374	-7.13239	NA	NA
ACH-001521	HKA1_SKIN	NA	Female	77	skin	Y-	XX	Female_XXhet	2.56229e-06	0.967127	4.49935	NA	NA
ACH-001522	HMY1_SKIN	NA	Male	62	skin	Y+	X	Male_XY	0.676281	0.700169	-9.03964	NA	NA
ACH-001523	HSC1_SKIN	NA	Male	75	skin	Y+	X	Male_XY	0.844186	0.589717	-10.4074	NA	NA
ACH-001524	HSC5_SKIN	NA	Male	75	skin	Y+	X	Male_XY	0.430415	0.697158	-6.80596	NA	NA
ACH-001525	HT3_CERVIX	907068	Female	59	cervix	Y-	XX	Female_XXhet	1.55901e-05	0.836494	4.55323	NA	NA
ACH-001526	HUO9_BONE	907072	Female	13	bone	Y-	XX	Female_XXhet	0.01726	0.973063	4.55323	NA	NA
ACH-001528	IHH4_THYROID	1240154	Male	75	thyroid	Y+	X	Male_XY	0.606179	0.624935	-8.70181	NA	NA
ACH-001529	JAR_PLACENTA	907175	Male	0	uterus	Y+	X	Male_XY	0.392629	0.743285	-6.25778	NA	NA
ACH-001530	JEG3_PLACENTA	907176	Male	NA	uterus	Y+	X	Male_XY	0.356124	0.597363	-7.58308	NA	NA
ACH-001532	JMURTK2_SOFT_TISSUE	NA	Miss_classification	1	kidney	Y+	X	NA	0.587278	0.554257	-8.91046	NA	NA
ACH-001533	KARPAS1718_HAEMATOPOIETIC_AND_LYMPHOID_TISSUE	NA	Male	NA	lymphocyte	Y+	X	Male_XY	0.610885	0.590583	-8.41434	NA	NA
ACH-001536	KKU100_BILIARY_TRACT	NA	Female	65	bile_duct	Y-	XX	Female_XXhet	0.000533803	1.28322	4.5259	NA	NA
ACH-001538	KKU213_BILIARY_TRACT	NA	Male	58	bile_duct	Y-	X	Male_X0	0.000596622	0.752145	4.55323	NA	NA
ACH-001539	KML1_HAEMATOPOIETIC_AND_LYMPHOID_TISSUE	NA	Female	28	lymphocyte	Y-	X	Female_X0	3.18849e-07	0.578662	4.55323	NA	NA
ACH-001542	KON_UPPER_AERODIGESTIVE_TRACT	1298215	Male	76	upper_aerodigestive	Y-	X	Male_X0	4.34884e-06	0.442227	4.45673	NA	NA
ACH-001543	KOSC2CL343_UPPER_AERODIGESTIVE_TRACT	753570	Male	51	upper_aerodigestive	Y-	X	Male_X0	0.0069375	0.686986	4.55126	NA	NA
ACH-001547	LO68_LUNG	NA	Male	NA	lung	Y-	X	Male_X0	0.0366841	0.648671	4.55323	NA	NA
ACH-001548	LS_AUTONOMIC_GANGLIA	NA	Female	1.3	peripheral_nervous_system	Y-	XX	Female_XXhet	9.46208e-07	0.878082	4.52457	NA	NA
ACH-001549	LU135_LUNG	713899	Male	69	lung	Y+	X	Male_XY	0.310926	0.475038	-6.10985	NA	NA
ACH-001550	MCC13_SKIN	NA	Female	NA	skin	Y-	XX	Female_XXhet	0.000261893	0.935616	4.01584	NA	NA
ACH-001551	MCC142_SKIN	NA	Male	80	skin	Y-	X	Male_X0	0.000396649	0.60611	4.38231	NA	NA
ACH-001552	MCC26_SKIN	NA	Female	NA	skin	Y-	XX	Female_XXhet	5.02132e-07	0.867455	4.3843	NA	NA
ACH-001554	MEL202_UVEA	NA	Female	NA	eye	Y-	X	Female_X0	0.000475659	0.532852	4.2458	NA	NA
ACH-001555	MERO14_PLEURA	NA	Male	60	lung	NA	X	NA	0.279006	0.65623	1.97444	NA	NA
ACH-001556	MERO25_PLEURA	NA	Male	60	lung	Y+	X	Male_XY	0.74852	0.690129	-11.1301	NA	NA
ACH-001557	MERO41_PLEURA	NA	Male	60	lung	Y+	X	Male_XY	0.77636	0.713904	-9.43305	NA	NA
ACH-001560	MERO83_PLEURA	NA	Male	NA	lung	Y+	X	Male_XY	0.431238	0.685246	-7.15608	NA	NA
ACH-001562	MERO95_PLEURA	NA	Male	NA	lung	Y+	X	Male_XY	0.559373	0.558322	-9.05485	NA	NA
ACH-001563	MM127_SKIN	NA	Male	NA	skin	Y+	X	Male_XY	0.566126	0.533441	-8.76318	NA	NA
ACH-001566	MM370_SKIN	NA	Male	NA	skin	Y+	X	Male_XY	0.662211	0.640338	-8.31734	NA	NA
ACH-001567	MM383_SKIN	NA	Male	NA	skin	Y+	X	Male_XY	0.859171	0.481617	-10.0438	NA	NA
ACH-001568	MM386_SKIN	NA	Male	NA	skin	Y+	X	Male_XY	0.714458	0.68947	-7.67259	NA	NA
ACH-001570	MM426_SKIN	NA	Male	NA	skin	Y+	X	Male_XY	0.575083	0.535109	-8.927	NA	NA
ACH-001574	MOLM14_HAEMATOPOIETIC_AND_LYMPHOID_TISSUE	NA	Male	20	blood	Y+	NA	NA	NA	NA	-6.7035	NA	NA
ACH-001577	MUTZ8_HAEMATOPOIETIC_AND_LYMPHOID_TISSUE	NA	Female	63	blood	Y-	XX	Female_XXhet	2.71936e-08	0.874233	4.55323	NA	NA
ACH-001607	NOZ_LIVER	NA	Female	48	bile_duct	Y-	X	Female_X0	0.00169445	0.550253	4.55323	NA	NA
ACH-001608	NP2_CENTRAL_NERVOUS_SYSTEM	NA	Male	63	central_nervous_system	NA	X	NA	0.21196	0.621546	-1.05152	NA	NA
ACH-001609	NP3_CENTRAL_NERVOUS_SYSTEM	NA	Male	64	central_nervous_system	Y+	X	Male_XY	0.567501	0.527965	-8.77718	NA	NA
ACH-001610	NP5_CENTRAL_NERVOUS_SYSTEM	NA	Male	27	central_nervous_system	Y+	X	Male_XY	0.331288	0.608472	-7.40261	NA	NA
ACH-001611	NP8_CENTRAL_NERVOUS_SYSTEM	NA	Female	38	central_nervous_system	Y-	XX	Female_XXhet	0.000201876	1.07941	4.49067	NA	NA
ACH-001616	OCILY18_HAEMATOPOIETIC_AND_LYMPHOID_TISSUE	NA	Male	56	lymphocyte	Y-	X	Male_X0	2.08311e-09	0.57903	4.55323	NA	NA
ACH-001619	OCUG1_BILIARY_TRACT	NA	Male	43	bile_duct	Y-	X	Male_X0	0.00681577	0.794767	2.73583	NA	NA
ACH-001622	ONDA7_CENTRAL_NERVOUS_SYSTEM	NA	Male	51	central_nervous_system	Y+	X	Male_XY	0.837195	0.728157	-8.81422	NA	NA
ACH-001623	ONDA8_CENTRAL_NERVOUS_SYSTEM	NA	Female	31	central_nervous_system	Y-	XX	Female_XXhet	4.64796e-06	0.864364	4.55323	NA	NA
ACH-001624	ONDA9_CENTRAL_NERVOUS_SYSTEM	NA	Male	58	central_nervous_system	Y+	X	Male_XY	0.674532	0.589209	-6.80792	NA	NA
ACH-001627	P4E6_PROSTATE	NA	Male	NA	prostate	Y-	X	Male_X0	1.63839e-07	0.538546	4.54614	NA	NA
ACH-001628	PEA1_OVARY	NA	Female	NA	ovary	Y-	X	Female_X0	0.00025527	0.54743	4.55323	NA	NA
ACH-001630	PEO1_OVARY	1480372	Female	NA	ovary	Y-	X	Female_X0	2.14973e-05	0.725579	4.55323	NA	NA
ACH-001634	PGA1_HAEMATOPOIETIC_AND_LYMPHOID_TISSUE	NA	Male	NA	blood	Y+	X	Male_XY	0.616928	0.539548	-7.54293	NA	NA
ACH-001645	SEKI_SKIN	NA	Female	28	skin	Y-	X	Female_X0	5.39195e-06	0.605071	4.32374	NA	NA
ACH-001647	SHI1_HAEMATOPOIETIC_AND_LYMPHOID_TISSUE	NA	Male	37	blood	Y+	X	Male_XY	0.557122	0.555646	-8.07655	NA	NA
ACH-001650	SISO_CERVIX	1240212	Female	67	cervix	Y-	XX	Female_XXhet	0.00863317	1.09947	4.44589	NA	NA
ACH-001651	SKGI_ENDOMETRIUM	NA	Female	NA	uterus	Y-	X	Female_X0	5.51611e-06	0.718916	4.55323	NA	NA
ACH-001652	SKGII_ENDOMETRIUM	NA	Female	NA	uterus	Y-	X	Female_X0	1.44504e-05	0.586756	4.53492	NA	NA
ACH-001653	SKGT2_STOMACH	1503364	Male	72	gastric	Y-	X	Male_X0	3.11666e-06	0.767918	4.55323	NA	NA
ACH-001654	SKGT4_OESOPHAGUS	1503365	Male	NA	esophagus	Y-	X	Male_X0	6.59541e-06	0.456028	4.27001	NA	NA
ACH-001655	SKN_ENDOMETRIUM	1240215	Female	52	uterus	Y-	X	Female_X0	1.39469e-05	0.639106	4.55323	NA	NA
ACH-001656	SKNO1_HAEMATOPOIETIC_AND_LYMPHOID_TISSUE	NA	Male	NA	blood	Y-	X	Male_X0	3.3842e-05	0.55868	4.29361	NA	NA
ACH-001664	SNU638_STOMACH	NA	Male	48	gastric	NA	X	NA	0.359973	0.524257	-2.05871	NA	NA
ACH-001668	SUSA_TESTIS	NA	Male	30	embryo	Y+	X	Male_XY	0.532327	0.801319	-6.09172	NA	NA
ACH-001669	TANOUE_HAEMATOPOIETIC_AND_LYMPHOID_TISSUE	NA	Male	11	blood	NA	X	NA	0.161987	0.678099	-3.44445	NA	NA
ACH-001670	TASK1_CENTRAL_NERVOUS_SYSTEM	NA	Female	21	peripheral_nervous_system	Y-	XX	Female_XXhet	0.00473858	0.964569	4.53834	NA	NA
ACH-001673	TFK1_BILIARY_TRACT	NA	Male	63	bile_duct	Y+	X	Male_XY	0.698502	0.39351	-9.05221	NA	NA
ACH-001674	TGW_AUTONOMIC_GANGLIA	910780	Male	NA	peripheral_nervous_system	Y-	X	Male_X0	0.000142256	0.654723	4.55323	NA	NA
ACH-001675	TR146_UPPER_AERODIGESTIVE_TRACT	NA	Female	NA	upper_aerodigestive	Y-	X	Female_X0	0.00890942	0.710169	NA	NA	NA
ACH-001677	U2904_HAEMATOPOIETIC_AND_LYMPHOID_TISSUE	NA	Male	59	lymphocyte	Y-	X	Male_X0	0.000167372	0.572982	4.55323	NA	NA
ACH-001685	UHO1_HAEMATOPOIETIC_AND_LYMPHOID_TISSUE	NA	Male	23	lymphocyte	Y+	X	Male_XY	0.584605	0.522203	-9.85876	NA	NA
ACH-001688	UMRC7_KIDNEY	NA	Male	NA	kidney	Y+	X	Male_XY	0.484064	0.770446	-6.66598	NA	NA
ACH-001690	UPCISCC026_UPPER_AERODIGESTIVE_TRACT	NA	Female	82	upper_aerodigestive	Y-	X	Female_X0	1.5112e-05	0.695156	4.55323	NA	NA
ACH-001692	UPCISCC040_UPPER_AERODIGESTIVE_TRACT	NA	Male	50	upper_aerodigestive	NA	X	NA	0.567107	0.626737	-1.3699	NA	NA
ACH-001694	UPCISCC074_UPPER_AERODIGESTIVE_TRACT	NA	Female	51	upper_aerodigestive	Y-	XX	Female_XXhet	0.0172406	0.835018	4.54753	NA	NA
ACH-001696	UPCISCC111_UPPER_AERODIGESTIVE_TRACT	NA	Female	69	upper_aerodigestive	Y-	XX	Female_XXhet	0.00416677	1.08871	4.55323	NA	NA
ACH-001698	UPCISCC116_UPPER_AERODIGESTIVE_TRACT	NA	Male	47	upper_aerodigestive	Y-	X	Male_X0	0.000152851	0.396607	4.55323	NA	NA
ACH-001699	UPCISCC131_UPPER_AERODIGESTIVE_TRACT	NA	Male	73	upper_aerodigestive	Y+	X	Male_XY	0.540323	0.659556	-5.9244	NA	NA
ACH-001701	UPCISCC200_UPPER_AERODIGESTIVE_TRACT	NA	Male	74	upper_aerodigestive	Y-	XX	Male_XX	0.083747	0.953581	0.0552972	NA	NA
ACH-001702	VAESBJ_SOFT_TISSUE	688121	Male	41	soft_tissue	Y-	X	Male_X0	8.22198e-07	0.726758	4.55323	NA	NA
ACH-001707	WAOSEL_HAEMATOPOIETIC_AND_LYMPHOID_TISSUE	NA	Male	NA	blood	Y+	X	Male_XY	0.594232	0.60119	-7.35852	NA	NA
ACH-001709	WSUNHL_HAEMATOPOIETIC_AND_LYMPHOID_TISSUE	909785	Female	46	lymphocyte	Y-	XX	Female_XXhet	0.0139764	0.96365	2.45714	NA	NA
ACH-001711	PFSK1_CENTRAL_NERVOUS_SYSTEM	683667	Male	2	central_nervous_system	Y+	X	Male_XY	0.597967	0.6783	-7.88133	NA	NA
ACH-001715	CAL72_BONE	906827	Male	10	bone	NA	X	NA	0.602714	0.582526	-1.66438	NA	NA
ACH-001719	OCIC4P_OVARY	NA	Female	NA	ovary	Y-	X	Female_X0	4.35068e-05	0.651106	4.55323	NA	NA
ACH-001735	SEMK2_HAEMATOPOIETIC_AND_LYMPHOID_TISSUE	NA	Female	5	blood	Y-	XX	Female_XXhet	0.00108888	0.867938	4.51696	NA	NA
ACH-001740	RH28_SOFT_TISSUE	NA	Male	17	soft_tissue	Y+	X	Male_XY	0.350688	0.424713	-6.87366	NA	NA
ACH-001750	TTC442_SOFT_TISSUE	NA	Male	NA	soft_tissue	Y+	X	Male_XY	0.698353	0.657739	-9.81399	NA	NA
ACH-001765	RH4_SOFT_TISSUE	NA	Female	NA	soft_tissue	Y-	X	Female_X0	1.32354e-05	0.593322	4.28411	NA	NA
ACH-001786	SNU1544_LARGE_INTESTINE	NA	Female	38	colorectal	Y-	XX	Female_XXhet	1.00065e-05	0.945067	4.55084	NA	NA
ACH-001795	94T778_SOFT_TISSUE	NA	Female	NA	soft_tissue	Y-	XX	Female_XXhet	0.000210065	0.829477	4.50227	NA	NA
ACH-001819	MFM223_BREAST	NA	Female	NA	breast	Y-	XX	Female_XXhet	1.63778e-06	0.927343	4.55323	NA	NA
ACH-001820	COLO824_BREAST	NA	Female	NA	breast	Y-	X	Female_X0	5.66908e-09	0.530604	4.54046	NA	NA
ACH-001850	G415_BILIARY_TRACT	NA	Male	NA	bile_duct	Y-	X	Male_X0	7.54965e-07	0.616657	4.55305	NA	NA
ACH-001852	HKGZCC_BILIARY_TRACT	NA	Male	NA	bile_duct	NA	XX	NA	0.666519	0.810143	-1.86193	NA	NA
ACH-001853	KMCH1_BILIARY_TRACT	NA	Male	NA	bile_duct	Y-	X	Male_X0	0.000100484	0.627442	4.55323	NA	NA
ACH-001856	RBE_BILIARY_TRACT	NA	Female	NA	bile_duct	Y-	XX	Female_XXhet	2.08701e-07	0.818443	4.55323	NA	NA
ACH-001857	SG231_BILIARY_TRACT	NA	Male	NA	bile_duct	Y-	X	Male_X0	0.0235989	0.744011	4.18548	NA	NA
ACH-001858	SSP25_BILIARY_TRACT	NA	Female	NA	bile_duct	Y-	X	Female_X0	0.000741982	0.705316	4.55323	NA	NA
ACH-001861	TGBC1TKB_BILIARY_TRACT	NA	Female	NA	bile_duct	Y-	X	Female_X0	1.01497e-06	0.762568	4.55323	NA	NA
ACH-001862	TGBC52TKB_BILIARY_TRACT	NA	Male	NA	bile_duct	Y-	X	Male_X0	6.17753e-05	0.587978	4.55323	NA	NA
ACH-001863	TKKK_BILIARY_TRACT	NA	Male	NA	bile_duct	Y+	X	Male_XY	0.673892	0.701726	-8.51217	NA	NA
ACH-001864	YSCCC_BILIARY_TRACT	NA	Female	NA	bile_duct	Y-	XX	Female_XXhet	1.54595e-05	0.853023	4.47368	NA	NA
ACH-001955	JHC7_BONE	NA	Female	NA	bone	NA	XX	Female_XXhet	NA	0.900254	NA	NA	NA
ACH-001956	MUGCHOR1_BONE	NA	Female	57	bone	NA	XX	Female_XXhet	NA	0.927593	NA	NA	NA
ACH-001957	UMCHOR1_BONE	NA	Male	64	bone	NA	X	NA	NA	0.65081	NA	NA	NA
ACH-001959	CCLP1_BILIARY_TRACT	NA	Miss_classification	NA	bile_duct	Y+	X	NA	0.562638	0.655045	-8.04241	NA	NA
ACH-001960	CCSW1_BILIARY_TRACT	NA	Female	NA	bile_duct	Y-	X	Female_X0	5.25282e-06	0.527537	4.55323	NA	NA
ACH-001970	MM253_SKIN	NA	Male	NA	skin	Y-	X	Male_X0	5.28145e-08	0.577283	4.55323	NA	NA
ACH-001973	MM485_SKIN	NA	Male	NA	skin	Y+	X	Male_XY	0.572132	0.530565	-8.26566	NA	NA
ACH-001977	NO36_LUNG	NA	Male	NA	lung	Y+	X	Male_XY	0.315682	0.802486	-5.15978	NA	NA
ACH-001982	NZM3_SKIN	NA	Male	69	skin	Y+	X	Male_XY	0.690081	0.670411	-8.18533	NA	NA
ACH-001991	NZOV9_OVARY	NA	Female	47	ovary	Y-	XX	Female_XXhet	1.38126e-05	1.21373	4.55323	NA	NA
ACH-001992	ONE58_LUNG	NA	Male	NA	lung	Y+	X	Male_XY	0.684233	0.771717	-8.74245	NA	NA
ACH-001993	NALM16_HAEMATOPOIETIC_AND_LYMPHOID_TISSUE	NA	Female	12	blood	Y-	X	Female_X0	1.02304e-09	0.696184	4.55323	NA	NA
ACH-002005	SKMEL19_SKIN	NA	Male	50	skin	Y-	X	Male_X0	7.19725e-06	0.796241	4.55323	NA	NA
ACH-002014	MEL270_UVEA	NA	Male	62	eye	NA	X	NA	0.136384	0.593266	-3.56101	NA	NA
ACH-002015	MEL285_UVEA	NA	Female	49	eye	Y-	XX	Female_XXhet	3.88169e-06	1.03794	4.54403	NA	NA
ACH-002016	MEL290_UVEA	NA	Female	67	eye	Y-	XX	Female_XXhet	1.0935e-09	0.937349	4.55323	NA	NA
ACH-002017	OMM1_UVEA	NA	Male	NA	eye	Y-	X	Male_X0	9.44474e-10	0.430133	4.55323	NA	NA
ACH-002018	OMM25_UVEA	NA	Male	NA	eye	Y+	X	Male_XY	0.651999	0.657929	-7.9385	NA	NA
ACH-002019	HOKUG_CERVIX	NA	Female	53	cervix	Y-	X	Female_X0	1.14284e-07	0.655941	4.55323	NA	NA
ACH-002021	T3M3_PLACENTA	NA	Female	NA	uterus	Y-	X	Female_X0	3.89464e-07	0.719813	4.55323	NA	NA
ACH-002023	TGBC18TKB_LARGE_INTESTINE	NA	Female	79	colorectal	Y-	X	Female_X0	6.50085e-07	0.734444	4.55323	NA	NA
ACH-002024	ECC4_LARGE_INTESTINE	NA	Male	45	colorectal	Y-	X	Male_X0	4.79044e-06	0.748458	4.55323	NA	NA
ACH-002025	TT1TKB_LARGE_INTESTINE	NA	Male	NA	colorectal	Y-	X	Male_X0	2.84284e-08	0.739144	4.55323	NA	NA
ACH-002026	HHUA_ENDOMETRIUM	NA	Female	54	uterus	Y-	XX	Female_XXhet	1.15401e-09	0.924449	4.55323	NA	NA
ACH-002027	HOUAI_ENDOMETRIUM	NA	Female	55	uterus	Y-	XX	Female_XXhet	4.54459e-06	0.930535	4.55323	NA	NA
ACH-002029	SAS_UPPER_AERODIGESTIVE_TRACT	NA	Female	NA	upper_aerodigestive	Y-	XX	Female_XXhet	1.89092e-05	0.866077	4.55323	NA	NA
ACH-002041	HOTHC_THYROID	NA	Female	NA	thyroid	Y-	XX	Female_XXhet	1.54633e-05	1.06311	4.55323	NA	NA
ACH-002042	T3M5_THYROID	NA	Female	71	thyroid	Y-	XX	Female_XXhet	0.000472295	0.858891	4.55323	NA	NA
ACH-002044	HSQ89_UPPER_AERODIGESTIVE_TRACT	NA	Male	74	upper_aerodigestive	NA	XX	NA	0.172112	0.883841	-4.44291	NA	NA
ACH-002045	HO1U1_UPPER_AERODIGESTIVE_TRACT	NA	Male	NA	upper_aerodigestive	Y+	X	Male_XY	1.13786	0.445689	-10.2625	NA	NA
ACH-002046	HTMMT_ENDOMETRIUM	NA	Female	66	uterus	Y-	X	Female_X0	5.95081e-07	0.710767	4.55323	NA	NA
ACH-002048	RMSYM_SOFT_TISSUE	NA	Male	2	soft_tissue	Y+	X	Male_XY	0.502628	0.639334	-7.55354	NA	NA
ACH-002055	TL1_HAEMATOPOIETIC_AND_LYMPHOID_TISSUE	NA	Male	NA	lymphocyte	Y+	X	Male_XY	0.613426	0.546468	-8.56195	NA	NA
ACH-002059	P30OHK_HAEMATOPOIETIC_AND_LYMPHOID_TISSUE	NA	Female	11	blood	Y-	X	Female_X0	1.6195e-06	0.548743	4.55323	NA	NA
ACH-002061	P2URK562_HAEMATOPOIETIC_AND_LYMPHOID_TISSUE	NA	Female	53	blood	Y-	XX	Female_XXhet	0.00607829	0.842193	4.42442	NA	NA
ACH-002062	SLVL_HAEMATOPOIETIC_AND_LYMPHOID_TISSUE	NA	Female	70	lymphocyte	Y-	X	Female_X0	5.90386e-06	0.769851	4.55323	NA	NA
ACH-002066	HSSCH2_CENTRAL_NERVOUS_SYSTEM	NA	Female	54	central_nervous_system	Y-	X	Female_X0	0.0638947	0.696815	4.55323	NA	NA
ACH-002067	NOS1_BONE	NA	Male	16	bone	NA	X	NA	0.39929	0.547658	0.617029	NA	NA
ACH-002069	HSOS1_BONE	NA	Female	11	bone	Y-	XX	Female_XXhet	0.00724291	0.813204	4.55323	NA	NA
ACH-002080	TN2_AUTONOMIC_GANGLIA	NA	Male	NA	peripheral_nervous_system	NA	X	NA	0.19604	0.600802	-4.05627	NA	NA
ACH-002084	MMAC_SKIN	NA	Female	39	skin	Y-	XX	Female_XXhet	0.0429373	0.899633	4.55323	NA	NA
ACH-002399	21NT_BREAST	NA	Female	36	breast	NA	NA	NA	NA	NA	NA	NA	NA
ACH-002458	HT144_SKIN_FV1_RESISTANT	NA	Male	29	skin	NA	X	NA	0.288683	0.435963	-2.46988	NA	NA
ACH-002459	HT144_SKIN_FV3_RESISTANT	NA	Male	29	skin	NA	X	NA	0.329684	0.435143	-2.04563	NA	NA
ACH-002460	HT144_SKIN_FV2_RESISTANT	NA	Male	29	skin	NA	X	NA	0.199851	0.444647	-2.41138	NA	NA
ACH-002461	RVH421_SKIN_FV1_RESISTANT	NA	Male	NA	skin	Y+	X	Male_XY	0.424385	0.517064	-6.14719	NA	NA
ACH-002462	RPE1SS48_ENGINEERED	NA	Female	NA	engineered	Y-	NA	NA	NA	NA	4.55323	NA	NA
ACH-002463	RPE1SS77_ENGINEERED	NA	Female	NA	engineered	Y-	NA	NA	NA	NA	4.55323	NA	NA
ACH-002464	RPE1SS6_ENGINEERED	NA	Female	NA	engineered	Y-	NA	NA	NA	NA	4.55323	NA	NA
ACH-002465	RPE1SS119_ENGINEERED	NA	Female	NA	engineered	Y-	XX	Female_XXhet	0.00947067	1.05028	4.55323	NA	NA
ACH-002467	RPE1SS51_ENGINEERED	NA	Female	NA	engineered	Y-	NA	NA	NA	NA	4.53492	NA	NA
ACH-002508	WM3211_SKIN	NA	Female	34	skin	Y-	X	Female_X0	1.46839e-05	0.785515	4.5259	NA	NA
ACH-002510	M040416_SKIN	NA	Male	54	skin	Y-	X	Male_X0	0.00197124	0.449916	4.55323	NA	NA
ACH-002511	M140325_SKIN	NA	Female	64	skin	Y-	XX	Female_XXhet	0.0161268	1.09991	4.55323	NA	NA
ACH-002659	JVE127_COLON	NA	Male	60	colorectal	NA	X	NA	0.0974552	0.5726	-0.78456	NA	NA
ACH-002687	WM3772F_EYE	NA	Female	NA	eye	Y-	X	Female_X0	0.00159061	0.650414	4.55323	NA	NA
ACH-002874		NA	Female	54	skin	NA	NA	NA	NA	NA	NA	NA	NA
ACH-002875		NA	Male	28	skin	NA	NA	NA	NA	NA	NA	NA	NA
