# Supplementary material for: Gene essentiality in cancer cell lines is modified by the sex chromosomes
Source: HighWire-hosted journal article supplement (doi:10.1101/gr.276488.121), 2022-11-01
Supplement: Supplemental_Table_S2.xlsx [file Supplemental_Table_S2.xlsx]

## Sheet: Table S2
Table S2. Expression analysis
					XX vs. XY cells				Y effect				X effect
Gene Symbol	Chr.	Located in PAR	XCI status		Fold change (log2) [FC > 0, more expressed in XY cells]	P value	FDR		Fold change (log2) [FC > 0, more expressed in Y+ cells relative to X0]	P value	FDR		Fold change (log2)[FC > 0, more expressed in XX cells relative to X0]	P value	FDR
ZFY	Y	FALSE	NA		2.41965	2.73e-257	5.23e-253		2.38396	1e-300	0		0.020143	0.400436	0.798883
UTY	Y	FALSE	NA		2.42321	1.23e-219	1.18e-215		2.38543	1e-300	0		0.0147766	0.598742	0.888445
DDX3Y	Y	FALSE	NA		3.25451	3.71e-217	2.37e-213		3.17703	1e-300	0		0.0281105	0.571748	0.878473
KDM5D	Y	FALSE	NA		2.87051	2.59e-191	1.24e-187		2.79501	3.49e-284	1.34e-280		0.0345211	0.468736	0.830357
PRKY	Y	FALSE	NA		2.26919	6.77e-189	2.6e-185		2.27113	4.53e-298	2.17e-294		0.0472574	0.102908	0.566099
USP9Y	Y	FALSE	NA		2.75736	1.2e-164	3.85e-161		2.72277	1.03e-258	3.3e-255		0.0319478	0.529701	0.861132
EIF1AY	Y	FALSE	NA		3.24903	2.47e-161	6.75e-158		3.1502	2.14e-253	5.86e-250		0.0593893	0.425782	0.812361
RPS4Y1	Y	FALSE	NA		3.41398	1.6e-121	3.83e-118		3.16346	2.97e-170	7.13e-167		-0.0854602	0.473546	0.833519
TMSB4Y	Y	FALSE	NA		1.42247	1.38e-91	2.95e-88		1.40055	3.97e-137	8.46e-134		0.0210078	0.487387	0.839619
NLGN4Y	Y	FALSE	NA		1.59475	1.67e-63	3.2e-60		1.70489	4.78e-118	9.17e-115		0.0354153	0.441382	0.818634
ZRSR2	X	FALSE	Escape		-0.231437	1.06e-30	1.84e-27		0.0175993	0.38852	0.756307		0.24543	1.13e-24	2.16e-20
ZFX	X	FALSE	Escape		-0.244624	4.96e-30	7.93e-27		0.0129965	0.56045	0.852156		0.212484	3.81e-17	2.44e-13
SYAP1	X	FALSE	Escape		-0.204885	5.42e-30	7.99e-27		-0.0107573	0.556018	0.850815		0.219229	1.13e-22	1.08e-18
EIF1AX	X	FALSE	Escape		-0.156518	8.27e-25	1.13e-21		-0.0252921	0.0918845	0.491099		0.144593	2.26e-15	8.67e-12
DDX3X	X	FALSE	Escape		-0.111319	1.68e-19	2.15e-16		-0.00383107	0.732278	0.920084		0.0929786	7.59e-12	1.12e-08
KDM5C	X	FALSE	Escape		-0.157486	7.06e-17	8.46e-14		0.026426	0.142359	0.562943		0.156412	1.35e-13	3.36e-10
TXLNG	X	FALSE	Escape		-0.184298	3.33e-14	3.76e-11		0.0308344	0.215749	0.626525		0.216994	6.2e-14	1.98e-10
TRAPPC2	X	FALSE	Escape		-0.163755	1.22e-13	1.3e-10		0.039177	0.0972941	0.498879		0.187387	4.07e-12	7.09e-09
RPS4X	X	FALSE	Escape		-0.0905747	1.16e-11	1.17e-08		-0.0240307	0.0556384	0.414688		0.0837752	2.99e-08	3.02e-05
KDM6A	X	FALSE	Escape		-0.211831	1.83e-11	1.75e-08		0.0973434	0.00737867	0.201001		0.261685	2.58e-10	3.3e-07
CHM	X	FALSE	Inactive		-0.147364	5.31e-11	4.85e-08		-0.0223002	0.352651	0.730727		0.0804374	0.00346934	0.24156
EIF2S3	X	FALSE	Escape		-0.0955902	1.02e-10	8.89e-08		-0.00746588	0.602792	0.870287		0.0740201	1.49e-05	0.0083701
CDK16	X	FALSE	Escape		-0.0772559	1.17e-10	9.77e-08		0.0223625	0.0605458	0.430032		0.100334	1.14e-11	1.56e-08
UBA1	X	FALSE	Escape		-0.06706	9.7e-10	7.75e-07		0.0132439	0.220188	0.630607		0.0988719	1.4e-13	3.36e-10
VCY1B	Y	FALSE	NA		0.332213	2.76e-09	2.11e-06		0.32543	9.78e-13	9.87e-10		0.0204527	0.656325	0.909578
VCY	Y	FALSE	NA		0.315213	1.03e-08	7.56e-06		0.32386	6.89e-13	7.34e-10		0.0259498	0.559925	0.87366
PUDP	X	FALSE	Escape		-0.287228	1.5e-08	1.07e-05		-0.0363376	0.511512	0.82528		0.239526	6.9e-05	0.0287644
TBL1Y	Y	FALSE	NA		0.237151	1.88e-08	1.29e-05		0.263082	1.79e-15	2.14e-12		0.025999	0.455008	0.825569
GEMIN8	X	FALSE	Escape		-0.143831	3.21e-08	2.12e-05		0.0402725	0.145916	0.567913		0.180336	2.1e-08	2.24e-05
CA5B	X	FALSE	Escape		-0.275031	4.13e-08	2.64e-05		0.0164342	0.730277	0.920061		0.345131	2.33e-09	2.63e-06
OFD1	X	FALSE	Escape		-0.13201	1.33e-07	8.21e-05		0.01576	0.504087	0.82089		0.147423	1.68e-07	0.000134087
DAZ1	Y	FALSE	NA		0.280525	1.4e-07	8.4e-05		0.294356	7.78e-11	7.46e-08		0.0331405	0.465226	0.829545
STS	X	FALSE	Escape		-0.361616	3.21e-07	0.000186822		0.0339448	0.658182	0.893039		0.333322	0.000101894	0.0398782
CXorf56	X	FALSE	Inactive		-0.0814527	8.52e-07	0.000480499		-0.0334272	0.0356829	0.352727		0.0323625	0.0866374	0.547675
TSPY4	Y	FALSE	NA		0.293562	1.23e-06	0.000672364		0.28716	2.06e-10	1.88e-07		0.0221572	0.649293	0.907609
MYCN	2	FALSE	NA		0.472177	1.35e-06	0.000716479		0.355628	0.000310445	0.0475554		0.0323317	0.783916	0.944632
MFNG	22	FALSE	NA		0.445749	1.47e-06	0.000761105		0.356108	0.00066848	0.0681097		-0.149255	0.199465	0.65644
USP9X	X	FALSE	Escape		-0.081235	2.42e-06	0.00122356		0.0652145	0.000155314	0.0313522		0.109281	1.04e-07	9.09e-05
NLRP2	19	FALSE	NA		-0.624239	9.62e-06	0.00472996		-0.231561	0.0840353	0.479341		0.282156	0.103724	0.566859
FUNDC1	X	FALSE	Escape		-0.154693	1.07e-05	0.00511544		-0.0205511	0.480631	0.81062		0.12631	0.000295473	0.0786985
MSL3	X	FALSE	Escape		-0.0872172	1.28e-05	0.00600104		0.0117672	0.574379	0.857567		0.0665122	0.00637496	0.276926
RBMY1A1	Y	FALSE	NA		0.214041	1.82e-05	0.00818565		0.206699	2.94e-08	2.4e-05		0.0251829	0.547979	0.869905
HCLS1	3	FALSE	NA		0.29441	1.84e-05	0.00818565		0.245684	0.00285965	0.139186		-0.328776	0.000204249	0.0619694
SMC1A	X	FALSE	Escape		-0.0862149	2.16e-05	0.0094167		0.0402884	0.0524957	0.407245		0.0952143	0.00010586	0.0406014
ERICH6B	13	FALSE	NA		0.206028	2.54e-05	0.0108251		0.130783	0.00738934	0.201001		-0.120584	0.0363349	0.453643
PNPLA4	X	FALSE	Escape		-0.397258	4.2e-05	0.017491		-0.224337	0.0144898	0.263202		0.23753	0.022389	0.398287
ULK4	3	FALSE	NA		-0.16301	5.23e-05	0.0213343		-0.105322	0.00893709	0.219234		0.0600351	0.197731	0.654825
PIN4	X	FALSE	Inactive		-0.0798645	7.62e-05	0.0304464		-0.0208278	0.302327	0.695906		0.0401532	0.0963164	0.555692
CLTRN	X	FALSE	Escape		-0.283603	0.000106562	0.0417047		0.0416859	0.535202	0.839144		0.342448	6.59e-05	0.0280924
UBE2A	X	FALSE	Inactive		-0.0568127	0.000112677	0.0432162		4.93e-06	0.999729	0.999885		0.069692	8.83e-05	0.0352599
TSPY2	Y	FALSE	NA		0.18608	0.000136363	0.0512752		0.187546	2.08e-07	0.000153555		0.0182619	0.659589	0.910258
ALDH8A1	6	FALSE	NA		0.203643	0.000144321	0.053224		0.147543	0.00590572	0.181497		-0.0525458	0.390882	0.793452
TSPY1	Y	FALSE	NA		0.193772	0.000153237	0.0554457		0.197502	1.66e-07	0.000127184		0.0256975	0.552839	0.871375
RBBP7	X	FALSE	Variable		-0.050621	0.000157559	0.055954		0.00177325	0.894736	0.972604		0.057915	0.000394419	0.0887099
PRKX	X	FALSE	Escape		-0.199206	0.000181319	0.0617292		-0.114203	0.0271311	0.322762		0.152531	0.00796541	0.303683
PSMD7	16	FALSE	NA		-0.0469158	0.000181898	0.0617292		-0.0337908	0.00489717	0.169825		0.0177815	0.225247	0.677653
CASC3	17	FALSE	NA		0.05174	0.000183478	0.0617292		0.0180393	0.164071	0.584072		-0.0341551	0.0338211	0.44363
KANSL1	17	FALSE	NA		0.0607613	0.000195958	0.0640336		0.0468234	0.00307343	0.140634		-0.0240807	0.215183	0.670377
RIBC1	X	FALSE	Escape		-0.192313	0.000197006	0.0640336		-0.0202347	0.679038	0.901602		0.187282	0.00221502	0.20423
FAM9C	X	FALSE	Escape		-0.273725	0.000219225	0.0698992		0.00354035	0.942227	0.984745		0.28769	0.000125039	0.044405
ETHE1	19	FALSE	NA		-0.134957	0.000222342	0.0698992		-0.0848075	0.00997407	0.231256		0.0410542	0.286236	0.725791
UBE2F	2	FALSE	NA		-0.0709197	0.000235549	0.0728568		-0.00514671	0.763354	0.931426		0.0828483	0.000140567	0.0481365
CCDC78	16	FALSE	NA		0.266017	0.000257506	0.0770198		0.108315	0.0753268	0.461662		-0.174875	0.0298876	0.429012
MUSTN1	3	FALSE	NA		0.265747	0.000258835	0.0770198		0.243342	0.000427108	0.0562967		-0.0157119	0.840306	0.961034
IQSEC2	X	FALSE	Escape		-0.198852	0.000261057	0.0770198		0.0525237	0.364699	0.738669		0.161337	0.0118429	0.326586
MYL6	12	FALSE	NA		-0.0571264	0.000276621	0.080375		-0.0254848	0.0780277	0.467488		0.0546638	0.00215765	0.20423
C1QTNF3	5	FALSE	NA		0.263874	0.000286296	0.0819447		0.194756	0.00420901	0.159518		-0.135268	0.108299	0.571931
ANK2	4	FALSE	NA		0.317589	0.000293364	0.0827331		0.00522671	0.947383	0.986359		-0.0741009	0.465267	0.829545
S100B	21	FALSE	NA		0.528007	0.000297945	0.0828072		0.352637	0.00626383	0.185945		-0.331785	0.0260599	0.412097
CPA4	7	FALSE	NA		-0.40526	0.000306691	0.0840202		-0.0669641	0.555503	0.850321		0.0926223	0.450939	0.823805
BBOF1	14	FALSE	NA		-0.180418	0.000344007	0.0929159		-0.0420212	0.408324	0.770205		0.152176	0.012949	0.33675
DPM1	20	FALSE	NA		-0.0547887	0.000376988	0.099797		-0.0405566	0.00724587	0.200494		0.0222333	0.228219	0.680375
SPA17	11	FALSE	NA		-0.123354	0.000379892	0.099797		-0.0295612	0.425551	0.778208		0.122163	0.00645288	0.276926
SERPINE1	7	FALSE	NA		-0.357655	0.000408643	0.105899		-0.181351	0.0342671	0.348615		0.169021	0.105281	0.569366
SMOX	20	FALSE	NA		-0.185411	0.000435008	0.111229		-0.0866609	0.0987268	0.501532		0.099173	0.107212	0.57175
APPBP2	17	FALSE	NA		0.0673878	0.000455269	0.113935		0.0561754	0.00304506	0.140373		-0.0353356	0.130262	0.592128
ARSG	17	FALSE	NA		0.218471	0.000457473	0.113935		0.0386436	0.494165	0.817091		-0.191733	0.00608608	0.273076
TMEM198	2	FALSE	NA		0.244422	0.000464812	0.114278		0.235003	0.000349053	0.0503293		0.0289016	0.730165	0.930768
CHRM4	11	FALSE	NA		0.177403	0.000477801	0.11484		-0.0539607	0.352643	0.730727		-0.223811	0.000909436	0.143603
GNG5	1	FALSE	NA		-0.0560947	0.000479076	0.11484		-0.0278052	0.0732701	0.457092		0.037282	0.0478726	0.483971
TAF13	1	FALSE	NA		-0.070461	0.000496835	0.117627		-0.0351536	0.074328	0.458695		0.0250982	0.287876	0.725917
ARL1	12	FALSE	NA		-0.0560382	0.000508767	0.118983		-0.0436914	0.00295094	0.139508		0.0473051	0.00919044	0.309664
HTR1D	1	FALSE	NA		-0.246343	0.000523319	0.120871		-0.160911	0.0362394	0.354835		0.124584	0.177159	0.637526
MIA	19	FALSE	NA		0.492591	0.000529446	0.120871		0.187619	0.18461	0.600316		-0.410845	0.00960573	0.315337
ACTRT3	3	FALSE	NA		-0.280045	0.0005534	0.123735		-0.128908	0.0914407	0.49056		0.101535	0.282539	0.722721
PCDHA10	5	FALSE	NA		0.17345	0.000559826	0.123735		0.0713095	0.199273	0.613101		-0.0835668	0.180962	0.641328
CDK5RAP2	9	FALSE	NA		0.0610668	0.000566064	0.123735		0.00487812	0.768275	0.933841		-0.0601326	0.00386413	0.249557
MCTS1	X	FALSE	Inactive		-0.0612246	0.0005678	0.123735		-0.0356046	0.0327143	0.345633		0.0487272	0.0166207	0.36056
WDR1	4	FALSE	NA		-0.0558707	0.000612205	0.131913		-0.0101931	0.499561	0.81895		0.0634653	0.000608464	0.113287
SMAGP	12	FALSE	NA		-0.158653	0.000631378	0.134533		-0.122666	0.0104039	0.233533		0.0685192	0.215134	0.670377
LRRC37A2	17	FALSE	NA		0.124249	0.000651069	0.13474		0.0325312	0.35098	0.72999		-0.101904	0.0215678	0.394286
TNFRSF14	1	FALSE	NA		0.318149	0.000654459	0.13474		0.25864	0.0057942	0.180963		-0.278229	0.00987506	0.315337
IFFO1	12	FALSE	NA		0.278868	0.00065678	0.13474		0.127069	0.0859636	0.483864		-0.206635	0.0229985	0.398428
LAPTM5	1	FALSE	NA		-0.242473	0.000660455	0.13474		-0.0598979	0.52362	0.831952		0.107268	0.193421	0.650722
EBF3	10	FALSE	NA		0.305927	0.000669397	0.135127		0.0411215	0.664032	0.895256		-0.214805	0.0459844	0.482721
LBX2	2	FALSE	NA		0.287358	0.000697658	0.139365		-0.0946179	0.187181	0.601974		-0.474675	2.09e-07	0.000160582
TSPY10	Y	FALSE	NA		0.163863	0.000745343	0.147355		0.151417	3.66e-05	0.0134863		0.0171725	0.685799	0.917793
HIGD1B	17	FALSE	NA		0.153016	0.00076378	0.149371		0.0504307	0.264391	0.66819		-0.132712	0.0163566	0.36022
SEC61G	7	FALSE	NA		-0.0550651	0.00077112	0.149371		-0.0366074	0.0176477	0.274254		0.0321907	0.0893044	0.550616
TUBB2B	6	FALSE	NA		0.309911	0.000825854	0.156616		0.163938	0.0606195	0.430045		-0.207705	0.0570673	0.499669
COPS9	2	FALSE	NA		-0.0588827	0.000830135	0.156616		-0.0193814	0.250485	0.658562		0.0513814	0.0124585	0.334636
ATG16L2	11	FALSE	NA		0.128494	0.000833019	0.156616		0.0787322	0.041198	0.3717		-0.0235409	0.619614	0.895877
PCDH11Y	Y	FALSE	NA		0.121701	0.000863588	0.160787		0.146523	9.96e-07	0.000669428		0.0182799	0.586426	0.88348
TAX1BP3	17	FALSE	NA		-0.0869518	0.000874572	0.161266		-0.0514094	0.0466602	0.389599		0.0885652	0.00645492	0.276926
LCP1	13	FALSE	NA		0.219603	0.000897297	0.162799		0.328305	0.000201756	0.0366905		0.00563558	0.951118	0.990734
NT5E	6	FALSE	NA		-0.321301	0.000899865	0.162799		-0.177193	0.054248	0.412473		-0.061884	0.520344	0.855141
EBLN1	10	FALSE	NA		-0.0714441	0.000919105	0.164726		-0.034517	0.0859086	0.48378		0.0396051	0.122883	0.582599
CRMP1	4	FALSE	NA		0.235827	0.00093749	0.166465		0.147867	0.0487546	0.397747		0.0224184	0.813119	0.952219
CASP7	10	FALSE	NA		-0.120918	0.000996592	0.175336		-0.0851779	0.00968438	0.22847		0.0410956	0.285251	0.724921
CCDC80	3	FALSE	NA		-0.29014	0.00102832	0.179274		-0.182288	0.0348132	0.349353		0.0741502	0.45794	0.826265
MYL12A	18	FALSE	NA		-0.0638472	0.0010917	0.187565		-0.0104603	0.560678	0.852156		0.041863	0.053232	0.497125
VGF	7	FALSE	NA		0.371941	0.00109544	0.187565		-0.0429904	0.679545	0.901602		-0.227343	0.0767367	0.534074
UAP1L1	9	FALSE	NA		0.197832	0.00111698	0.188557		0.115687	0.0331646	0.346599		-0.189648	0.00488609	0.257016
HMBOX1	8	FALSE	NA		0.0891416	0.0011209	0.188557		0.0183152	0.496006	0.817533		-0.0756477	0.0193831	0.382756
STYX	14	FALSE	NA		-0.0792929	0.00115164	0.190548		-0.0741771	0.00109229	0.0895164		0.0270138	0.318238	0.745338
RNASE4	14	FALSE	NA		-0.266771	0.0011526	0.190548		-0.0759128	0.34546	0.726216		0.326558	0.00095187	0.143732
STARD3	17	FALSE	NA		0.0603804	0.00116323	0.19066		-0.0108884	0.536044	0.839735		-0.0815525	0.000259226	0.072046
KCNC1	11	FALSE	NA		0.16851	0.00118461	0.19252		0.185304	0.000145317	0.0303605		-0.0815088	0.165821	0.627041
LIPK	10	FALSE	NA		-0.0953074	0.00120442	0.194093		-0.05255	0.0918321	0.491099		0.077671	0.0464481	0.483971
FOXK2	17	FALSE	NA		0.0490012	0.0012508	0.197688		0.0213022	0.14834	0.571393		-0.0303879	0.0967626	0.556787
HDAC5	17	FALSE	NA		0.116568	0.00127247	0.197688		-0.00364781	0.908998	0.976192		-0.127123	0.00120075	0.155835
MYL12B	18	FALSE	NA		-0.0517152	0.00127728	0.197688		-0.0181099	0.227004	0.637795		0.0497349	0.00707401	0.284508
SOX5	12	FALSE	NA		0.274855	0.00129053	0.197688		0.144111	0.10299	0.50798		-0.297853	0.00522574	0.258484
MED14	X	FALSE	Escape		-0.0517962	0.00129203	0.197688		0.0466467	0.00564251	0.177971		0.077763	0.000119135	0.0434948
HIGD1A	3	FALSE	NA		-0.0571404	0.00130488	0.197688		-0.0193053	0.266055	0.669491		0.0523357	0.0129388	0.33675
CD9	12	FALSE	NA		-0.177944	0.00131331	0.197688		-0.114145	0.0431836	0.378848		0.0888816	0.157597	0.616784
CDK7	5	FALSE	NA		-0.0675208	0.00132634	0.197688		-0.0357554	0.062022	0.431073		0.029403	0.207461	0.663226
USP20	9	FALSE	NA		0.0719832	0.00134124	0.197688		0.055747	0.0118724	0.242761		-0.0322178	0.231314	0.68448
FBXO27	19	FALSE	NA		-0.312251	0.0013571	0.197688		-0.186722	0.0564686	0.417302		0.0202796	0.866221	0.968385
SOCS6	18	FALSE	NA		-0.128275	0.00136929	0.197688		-0.030333	0.443142	0.787966		0.107618	0.0146714	0.351121
ADM	11	FALSE	NA		-0.236219	0.00136984	0.197688		-0.116973	0.0935192	0.492916		-0.0581401	0.458416	0.826303
PSD	10	FALSE	NA		0.215534	0.00137237	0.197688		0.0856921	0.156682	0.577442		-0.221419	0.00282756	0.221326
RNF144A	2	FALSE	NA		0.307636	0.00138126	0.197688		0.349051	0.000410184	0.0550077		-0.174478	0.127471	0.588473
ALG13	X	FALSE	Variable		-0.0502714	0.00138135	0.197688		-0.00275303	0.856944	0.962846		0.0581846	0.00193563	0.195709
MPP7	10	FALSE	NA		-0.290353	0.00140357	0.197719		-0.144627	0.0895836	0.487842		0.146459	0.162822	0.623988
RBM10	X	FALSE	Inactive		0.0424232	0.00141129	0.197719		0.0355549	0.00449323	0.163224		0.000748165	0.961342	0.991911
SLC35A2	X	FALSE	Inactive		-0.0570464	0.00142655	0.197719		-0.0118629	0.501183	0.819439		0.0715459	0.00104658	0.149777
INTS4	11	FALSE	NA		0.0550668	0.00143219	0.197719		-0.0238301	0.14458	0.565262		-0.0588441	0.00431154	0.254288
CDK5RAP3	17	FALSE	NA		0.0454482	0.00144065	0.197719		0.0223414	0.0991018	0.501709		-0.013293	0.42956	0.81429
RNF40	16	FALSE	NA		0.0387704	0.00144343	0.197719		0.000298801	0.979679	0.995819		-0.0128153	0.386312	0.790401
VPS26A	10	FALSE	NA		-0.0567104	0.00145775	0.198265		-0.032222	0.0578514	0.421185		0.00821343	0.689465	0.91961
CPSF4	7	FALSE	NA		0.0550529	0.00148888	0.198896		-0.000533397	0.973558	0.993652		-0.0412	0.0422123	0.474227
C20orf204	20	FALSE	NA		0.217974	0.0014964	0.198896		0.133578	0.0355071	0.352261		-0.103299	0.16203	0.623089
CDC42EP1	22	FALSE	NA		-0.238355	0.00150527	0.198896		-0.0948003	0.160973	0.580559		0.0986756	0.230387	0.683012
MADD	11	FALSE	NA		0.0666882	0.00150813	0.198896		0.0410029	0.0366649	0.356516		-0.0598675	0.0122474	0.332676
SEPTIN3	22	FALSE	NA		0.321433	0.00151425	0.198896		0.224666	0.0279082	0.325941		-0.044208	0.726045	0.929995
MORF4L2	X	FALSE	Inactive		-0.0397241	0.00161075	0.201483		-0.0111454	0.371579	0.74394		0.0350406	0.0227008	0.398428
SP6	17	FALSE	NA		-0.255951	0.00163519	0.201483		-0.0425282	0.578546	0.858483		0.140913	0.139839	0.600804
LEXM	1	FALSE	NA		-0.0970195	0.00164086	0.201483		-0.057431	0.0446794	0.382839		0.101177	0.00368483	0.245098
RBMY1E	Y	FALSE	NA		0.12968	0.0016411	0.201483		0.133923	1.26e-05	0.00634055		0.0241032	0.501705	0.845486
TBC1D8B	X	FALSE	Inactive		-0.229421	0.00165926	0.201483		-0.287528	1.99e-05	0.00866379		0.065918	0.423564	0.811623
TPM4	19	FALSE	NA		-0.0619807	0.00166233	0.201483		0.00446499	0.816114	0.949783		0.0411812	0.0747893	0.531592
FBXL20	17	FALSE	NA		0.0919313	0.00166607	0.201483		0.0417167	0.156073	0.577442		-0.0676375	0.066455	0.513449
EFEMP1	2	FALSE	NA		-0.303722	0.00167009	0.201483		-0.157918	0.0960065	0.496845		0.0106609	0.928538	0.984806
LIMD2	17	FALSE	NA		0.196483	0.00167299	0.201483		0.0923281	0.158907	0.578669		-0.138804	0.0662313	0.51337
TUT1	11	FALSE	NA		0.0543867	0.00167797	0.201483		0.00617086	0.708551	0.912444		-0.0723813	0.00039526	0.0887099
LIG3	17	FALSE	NA		0.0752157	0.00169174	0.201483		0.0312178	0.1689	0.586774		-0.0504565	0.0749138	0.531885
DKK1	10	FALSE	NA		-0.310912	0.00170054	0.201483		-0.0943471	0.324867	0.713545		-0.0257248	0.812219	0.952219
TMSB10	2	FALSE	NA		-0.0546899	0.00170575	0.201483		-0.0311197	0.0609048	0.430467		0.0372995	0.0668536	0.514261
KLF12	13	FALSE	NA		0.269185	0.0017093	0.201483		0.211401	0.0090495	0.219952		-0.179239	0.0703168	0.522461
CST7	20	FALSE	NA		-0.298537	0.0017127	0.201483		-0.0783969	0.38375	0.754401		0.133905	0.259364	0.705969
CADM1	11	FALSE	NA		0.392626	0.00171289	0.201483		0.181308	0.122968	0.538762		-0.279164	0.0513435	0.492964
RAB9A	X	FALSE	Escape		-0.0858342	0.00174124	0.201483		0.0522355	0.0742391	0.458661		0.104818	0.00246549	0.211489
SCHIP1	3	FALSE	NA		0.300198	0.0017462	0.201483		0.162778	0.0694698	0.448071		-0.121157	0.272066	0.716542
RBFOX1	16	FALSE	NA		0.162443	0.00174996	0.201483		0.118423	0.0206973	0.292367		-0.0287072	0.616728	0.894479
IGSF9B	11	FALSE	NA		0.2622	0.00175726	0.201483		0.0439558	0.630992	0.881948		-0.188622	0.0834136	0.544943
RSU1	10	FALSE	NA		-0.0735844	0.00176305	0.201483		-0.0402377	0.0762282	0.46319		0.0717475	0.00891504	0.307141
CD14	5	FALSE	NA		-0.272142	0.00176509	0.201483		-0.0737922	0.365725	0.739821		0.238952	0.0213582	0.392363
HAGHL	16	FALSE	NA		0.169016	0.00178387	0.20159		0.0337028	0.452526	0.794406		-0.157187	0.00860806	0.305882
TRAF3IP1	2	FALSE	NA		-0.0762811	0.0017924	0.20159		0.0242572	0.304012	0.69779		0.0476875	0.0864911	0.547666
PPP1CA	11	FALSE	NA		-0.041118	0.00179757	0.20159		-0.0530022	1.74e-05	0.0079575		0.0199207	0.18813	0.646573
CD70	19	FALSE	NA		-0.34502	0.00181811	0.201933		-0.148515	0.15538	0.577119		0.161133	0.198179	0.655039
PAPSS2	10	FALSE	NA		-0.330694	0.00182169	0.201933		-0.177009	0.0719174	0.45402		0.169647	0.161764	0.622851
DCAKD	17	FALSE	NA		0.0720366	0.00184716	0.202627		0.0753494	0.000625497	0.0663028		-0.0176729	0.512176	0.851569
TSTD2	9	FALSE	NA		0.0691076	0.00184908	0.202627		0.0628918	0.00226049	0.125097		-0.0333972	0.185969	0.645539
PLAU	10	FALSE	NA		-0.277354	0.0018879	0.205706		-0.270513	0.0031934	0.142418		-0.0471383	0.605694	0.890682
MYL9	20	FALSE	NA		-0.428384	0.00192734	0.208817		-0.104425	0.440003	0.787429		0.0689732	0.647744	0.906902
RBM33	7	FALSE	NA		0.0554336	0.00194409	0.209168		0.0150642	0.376667	0.747874		-0.0325349	0.129203	0.591123
TBC1D16	17	FALSE	NA		0.13715	0.0019524	0.209168		0.0652486	0.130264	0.548539		-0.134712	0.0101404	0.316714
HPGD	4	FALSE	NA		-0.404668	0.00197802	0.210736		-0.184358	0.145495	0.566875		0.35073	0.0214098	0.392363
NAA10	X	FALSE	Variable		-0.0452301	0.00201996	0.213133		-0.00570202	0.684516	0.903564		0.0400533	0.0205897	0.386429
ARPC4	3	FALSE	NA		-0.0537249	0.00202583	0.213133		-0.0377695	0.022535	0.300509		0.0381778	0.0579282	0.501838
CLEC3B	3	FALSE	NA		0.170089	0.00205202	0.213133		0.0868499	0.10207	0.50644		-0.0479375	0.427095	0.813308
TCEANC	X	FALSE	Escape		-0.139088	0.0020605	0.213133		0.146423	0.000620242	0.0663028		0.247992	2.55e-06	0.00168753
GBP1	1	FALSE	NA		-0.276275	0.00207191	0.213133		0.0590698	0.525484	0.833171		0.195352	0.0617531	0.507907
RUNDC3A	17	FALSE	NA		0.27225	0.00209134	0.213133		0.234296	0.00553214	0.176442		0.00293273	0.976201	0.993705
MKNK2	19	FALSE	NA		-0.0704691	0.00209619	0.213133		-0.0247184	0.256135	0.663053		0.050132	0.0599714	0.503019
MAST1	19	FALSE	NA		0.249507	0.00209925	0.213133		-0.0364705	0.623639	0.87969		-0.282302	0.00270818	0.21848
PDE2A	11	FALSE	NA		0.267272	0.00210754	0.213133		0.157456	0.0726709	0.455482		-0.261734	0.0127857	0.33675
SDC4	20	FALSE	NA		-0.173705	0.00212122	0.213133		-0.116333	0.0157207	0.267502		0.0441399	0.442853	0.819818
FAM199X	X	FALSE	Inactive		-0.0654836	0.00212721	0.213133		-0.013944	0.485969	0.812972		0.048554	0.0471759	0.483971
C1GALT1C1	X	FALSE	Inactive		-0.0727758	0.00213389	0.213133		-0.0127057	0.569558	0.855512		0.0473216	0.0783933	0.537887
GRHL3	1	FALSE	NA		-0.285356	0.00216494	0.215114		-0.0775862	0.363181	0.737477		0.30717	0.00317652	0.234293
GRIN3A	9	FALSE	NA		0.0976433	0.0022359	0.22102		0.0757599	0.017877	0.275584		-0.0415669	0.267488	0.711886
CSTB	21	FALSE	NA		-0.0805329	0.00226768	0.222456		-0.0205	0.428577	0.779816		0.0900522	0.00437742	0.254288
NBEA	13	FALSE	NA		0.211489	0.00227363	0.222456		0.134319	0.0536389	0.410774		-0.109342	0.203145	0.659619
LAMTOR2	1	FALSE	NA		-0.0506274	0.0023108	0.222943		-0.0226955	0.158135	0.57794		0.0667252	0.000736642	0.127828
AKT3	1	FALSE	NA		0.268879	0.00231152	0.222943		0.018629	0.804174	0.945765		-0.253139	0.00841605	0.304945
ZNF487	10	FALSE	NA		-0.139656	0.0023233	0.222943		0.0117326	0.7832	0.938062		0.0994564	0.0532003	0.497125
SNCG	10	FALSE	NA		-0.27612	0.00232511	0.222943		-0.0889498	0.337184	0.719928		-0.0705608	0.529518	0.861132
KIAA1958	9	FALSE	NA		0.151583	0.00235184	0.224384		0.0568177	0.223818	0.633869		-0.0946152	0.105681	0.569761
NNAT	20	FALSE	NA		0.303075	0.00236773	0.224782		0.255333	0.00262767	0.136153		-0.238275	0.0234252	0.401811
FGF16	X	FALSE	NA		-0.0544689	0.0024034	0.227045		-0.0525939	0.00731074	0.200494		0.033437	0.171338	0.630713
PODNL1	19	FALSE	NA		-0.248762	0.00243381	0.22879		-0.121609	0.125436	0.54166		0.164697	0.0911327	0.550984
H4C6	6	FALSE	NA		-0.101254	0.00248563	0.232097		-0.0590029	0.0711245	0.45179		0.0446929	0.285664	0.725321
RARG	12	FALSE	NA		-0.139362	0.00250321	0.232097		-0.0778012	0.0825112	0.475087		0.0268369	0.60346	0.890345
NOG	12	FALSE	NA		-0.334942	0.0025053	0.232097		-0.142335	0.136391	0.555657		0.0303261	0.811806	0.952219
GREB1	2	FALSE	NA		0.262567	0.0025275	0.232449		0.121452	0.156868	0.577442		-0.246794	0.0149462	0.353208
AFAP1L2	10	FALSE	NA		-0.291823	0.00254293	0.232449		-0.18888	0.0469227	0.391019		-0.21846	0.0484817	0.483971
RHOA	3	FALSE	NA		-0.034787	0.00254546	0.232449		-0.0157423	0.160385	0.580431		0.0261961	0.0535554	0.497125
ARHGEF35	7	FALSE	NA		-0.286425	0.00256671	0.233278		-0.163068	0.0854083	0.482011		0.202815	0.0805072	0.541224
ECHS1	10	FALSE	NA		-0.0467522	0.00259627	0.234386		-0.0596785	3.88e-05	0.0139272		0.0330345	0.0648711	0.512308
VRTN	14	FALSE	NA		-0.0926033	0.00263922	0.234386		-0.0165361	0.503307	0.820615		0.125776	7.82e-05	0.0319176
BZW1	2	FALSE	NA		-0.0425	0.00267533	0.234386		-0.0126682	0.370443	0.743541		0.036274	0.0357752	0.451445
DAZ3	Y	FALSE	NA		0.122472	0.00268072	0.234386		0.118796	0.000520152	0.0623455		0.0265529	0.505632	0.84695
AIRE	21	FALSE	NA		-0.0658097	0.00269653	0.234386		-0.0545719	0.0131039	0.253694		0.0245542	0.37941	0.786185
HOPX	4	FALSE	NA		-0.370659	0.00269974	0.234386		-0.120973	0.262616	0.667221		0.364426	0.00932986	0.311593
KMT2B	19	FALSE	NA		0.055326	0.0027055	0.234386		0.00822892	0.626595	0.879976		-0.0305819	0.151269	0.611099
SLC30A9	4	FALSE	NA		-0.0459491	0.00270641	0.234386		0.0168027	0.287968	0.685005		0.053198	0.00507855	0.257016
TMEM145	19	FALSE	NA		0.280852	0.00271983	0.234386		0.0545876	0.541264	0.843408		-0.18804	0.0829177	0.544746
LY6K	8	FALSE	NA		-0.26936	0.00272181	0.234386		-0.244835	0.00707755	0.197851		0.0782662	0.518663	0.854778
GNRH1	8	FALSE	NA		0.156759	0.00273227	0.234386		0.119133	0.0147369	0.263262		-0.0615581	0.309685	0.739673
ZC3H13	13	FALSE	NA		0.0707939	0.00273534	0.234386		0.010438	0.634073	0.883675		-0.0611911	0.0229537	0.398428
KLK9	19	FALSE	NA		-0.110997	0.00273778	0.234386		-0.060745	0.0632241	0.434103		0.0934533	0.0197297	0.383607
NRIP2	12	FALSE	NA		0.150263	0.00277132	0.235059		0.0845244	0.0694346	0.448071		-0.0766792	0.181954	0.642077
FAM3C	7	FALSE	NA		-0.0777074	0.00277651	0.235059		-0.0447503	0.0741218	0.458651		0.0362409	0.233533	0.68597
TGIF2LY	Y	FALSE	NA		0.0830397	0.00278242	0.235059		0.0925319	2.36e-05	0.0100709		0.0300816	0.245063	0.695937
MAB21L1	13	FALSE	NA		0.226094	0.00283636	0.237442		0.0194445	0.770009	0.934476		-0.230616	0.00451802	0.25483
HRG	3	FALSE	NA		-0.10633	0.00284545	0.237442		-0.0489301	0.145214	0.566585		0.113424	0.0052298	0.258484
MAPT	17	FALSE	NA		0.290731	0.00285006	0.237442		0.0879404	0.34496	0.726039		-0.150561	0.186227	0.645539
CDK20	9	FALSE	NA		0.195371	0.00286016	0.237442		0.146957	0.0200319	0.288619		0.127717	0.132981	0.594189
ZGLP1	19	FALSE	NA		0.165188	0.00289163	0.238555		0.144999	0.00629379	0.185945		-0.0610461	0.355774	0.771236
LZTS3	20	FALSE	NA		0.17867	0.00290813	0.238555		0.163859	0.0044779	0.163224		-0.0838361	0.259163	0.705961
VIL1	2	FALSE	NA		-0.311975	0.00291813	0.238555		-0.0749197	0.443583	0.788305		0.646638	7.84e-08	7.16e-05
KAT7	17	FALSE	NA		0.0460939	0.00292331	0.238555		0.0313186	0.0304809	0.337824		-0.00493547	0.780097	0.944129
RAD51D	17	FALSE	NA		0.0792809	0.0029591	0.239947		0.0127157	0.591553	0.865761		-0.0326765	0.281513	0.722178
SLC26A4	7	FALSE	NA		0.175426	0.0029654	0.239947		0.0872777	0.120947	0.535659		-0.0848305	0.188707	0.646626
CEP95	17	FALSE	NA		0.0511653	0.0030798	0.245927		0.0334839	0.0345992	0.348974		-0.0143188	0.466677	0.83035
SPOCK1	5	FALSE	NA		-0.323683	0.00308735	0.245927		-0.0516308	0.62406	0.87969		0.491792	0.000403943	0.0890393
ASTN2	9	FALSE	NA		0.188929	0.00310583	0.245927		0.111935	0.0661188	0.441165		-0.0124895	0.872202	0.969845
PRRC2B	9	FALSE	NA		0.0461433	0.00310905	0.245927		0.02436	0.113115	0.525535		-0.0422337	0.026503	0.414896
GGT7	20	FALSE	NA		0.192478	0.00311609	0.245927		-0.0568383	0.320411	0.710019		-0.179642	0.0204536	0.386429
HNRNPA1L2	13	FALSE	NA		0.0700269	0.00311663	0.245927		0.0277635	0.230037	0.641246		-0.0285255	0.317763	0.745338
RPS4Y2	Y	FALSE	NA		0.0537021	0.00312907	0.245927		0.056048	0.000197155	0.0366905		0.0226917	0.208852	0.664814
CIB1	15	FALSE	NA		-0.0671279	0.0031826	0.249114		-0.0587506	0.00513636	0.172504		0.0598639	0.0214217	0.392363
SMIM3	5	FALSE	NA		-0.206391	0.00320474	0.249826		-0.0261547	0.73054	0.920061		0.16807	0.040882	0.471703
ACADSB	10	FALSE	NA		-0.11036	0.00324376	0.250837		0.000951217	0.980171	0.99596		0.147095	0.00133977	0.160163
P3H2	3	FALSE	NA		-0.228333	0.00324387	0.250837		-0.181759	0.0114313	0.239321		-0.0316931	0.727122	0.930097
NEB	2	FALSE	NA		0.242682	0.00326361	0.251069		0.0544402	0.484186	0.811982		-0.204039	0.0313697	0.431788
TRAPPC1	17	FALSE	NA		-0.0449776	0.00327822	0.251069		-0.0368733	0.00925734	0.223025		0.0352115	0.0430702	0.476725
LSM3	3	FALSE	NA		-0.0552962	0.00328614	0.251069		-0.0494215	0.0087203	0.217268		0.0368661	0.105563	0.569761
CLCN7	16	FALSE	NA		0.0717224	0.00330036	0.251155		0.0144594	0.509596	0.823573		-0.0983265	0.00031826	0.0803062
HSD17B14	19	FALSE	NA		0.328574	0.00336137	0.253475		0.0795719	0.441318	0.78749		-0.10497	0.421108	0.811075
CIB4	2	FALSE	NA		-0.0956857	0.00336185	0.253475		-0.0112771	0.695863	0.907555		0.0905208	0.0146708	0.351121
EPS8L3	1	FALSE	NA		-0.2374	0.00338552	0.253475		0.0282247	0.729673	0.919962		0.305723	0.00165168	0.179968
SLC66A3	2	FALSE	NA		-0.124067	0.00339368	0.253475		-0.0419171	0.331461	0.715976		0.074742	0.134769	0.59505
MAPK8IP1	11	FALSE	NA		0.17848	0.00339694	0.253475		0.104014	0.0942607	0.494518		-0.0438566	0.577484	0.88063
SELENOM	22	FALSE	NA		-0.247459	0.00342563	0.254625		-0.119182	0.148641	0.571921		0.0802786	0.430235	0.814716
PAQR7	1	FALSE	NA		-0.188875	0.00345698	0.255963		-0.117933	0.0521186	0.406165		0.0138968	0.849654	0.963829
CRISPLD1	8	FALSE	NA		0.276935	0.00348926	0.256472		-0.114446	0.245521	0.65442		-0.312298	0.00807109	0.303991
PRR3	6	FALSE	NA		0.0685755	0.0034906	0.256472		0.0110243	0.622184	0.878941		-0.0401072	0.140981	0.603037
TEPSIN	17	FALSE	NA		0.0773561	0.00351432	0.257229		0.0200753	0.399557	0.763938		-0.0416877	0.170272	0.630348
SYNPO	5	FALSE	NA		-0.246683	0.00358701	0.260714		-0.0746046	0.337516	0.720329		0.193463	0.0655982	0.512308
ACOT9	X	FALSE	Inactive		-0.135543	0.00361591	0.260714		-0.109608	0.00614475	0.185479		0.0559499	0.234693	0.686643
ACE2	X	FALSE	Escape		-0.182369	0.00362731	0.260714		-0.0458734	0.442267	0.787645		0.199621	0.00539483	0.261916
S100A4	1	FALSE	NA		-0.215863	0.00362876	0.260714		-0.0875214	0.241586	0.651693		0.162853	0.0499944	0.486372
DDX53	X	FALSE	NA		-0.142944	0.00362991	0.260714		-0.103871	0.0368752	0.356921		0.111496	0.0766271	0.53401
ACTR3	2	FALSE	NA		-0.0360831	0.00364631	0.260915		-0.0318582	0.00707113	0.197851		0.016881	0.241942	0.693635
ZBTB37	1	FALSE	NA		0.126414	0.00370021	0.263169		0.100049	0.0145484	0.263202		-0.0719135	0.156118	0.616112
ANXA2	15	FALSE	NA		-0.0868096	0.00370525	0.263169		-0.0488594	0.090012	0.488281		0.0479739	0.17482	0.63567
COPB2	3	FALSE	NA		-0.03246	0.00372269	0.263432		-0.0249619	0.0212578	0.295808		0.00316639	0.810315	0.952184
TMEM14A	6	FALSE	NA		-0.0794157	0.00375059	0.263673		-0.0684018	0.00396728	0.155584		0.0582756	0.0462894	0.483229
CCDC68	18	FALSE	NA		-0.230645	0.00376161	0.263673		-0.105598	0.20233	0.615807		0.114771	0.257012	0.704304
ITGAE	17	FALSE	NA		-0.0555289	0.00376735	0.263673		-0.00765395	0.681419	0.902394		0.0742623	0.00146094	0.166393
CXorf58	X	FALSE	Inactive		-0.0774662	0.00378124	0.263683		-0.0217117	0.357353	0.734115		0.0419204	0.167351	0.627794
ABHD5	3	FALSE	NA		-0.0844156	0.00381732	0.26463		-0.0365455	0.178492	0.594983		0.123334	0.000285056	0.0769932
DISC1	1	FALSE	NA		0.232066	0.00383353	0.26463		0.0326272	0.658451	0.893039		-0.230494	0.010824	0.322114
LRRC37A	17	FALSE	NA		0.126913	0.00383621	0.26463		0.0442206	0.303669	0.697279		-0.108319	0.0420825	0.474162
SEMA6D	15	FALSE	NA		0.228482	0.00386089	0.26475		0.227737	0.00366069	0.151144		-0.0700458	0.433428	0.816267
NMNAT2	1	FALSE	NA		0.253636	0.00386557	0.26475		0.310674	0.000528262	0.0624174		-0.194318	0.0728592	0.527296
PCED1A	20	FALSE	NA		0.0911844	0.00388429	0.265086		0.0440957	0.125511	0.541817		-0.0954812	0.00875121	0.306804
PMCH	12	FALSE	NA		-0.110695	0.00393088	0.266946		0.00509607	0.870683	0.966246		0.104427	0.0139984	0.346132
RASA4	7	FALSE	NA		0.176079	0.0039394	0.266946		0.0425374	0.443864	0.7885		-0.161989	0.0201763	0.384893
CTPS2	X	FALSE	Variable		-0.145205	0.00396612	0.267272		0.0292326	0.564384	0.853804		0.193616	0.00198969	0.197701
DAZ2	Y	FALSE	NA		0.101155	0.00397207	0.267272		0.0965146	0.000627423	0.0663028		0.0257591	0.439802	0.818062
SNX12	X	FALSE	Inactive		-0.0407092	0.00400036	0.268234		-0.0251095	0.0681214	0.444719		0.0114392	0.494768	0.842335
DHRS13	17	FALSE	NA		0.131539	0.00407574	0.272336		0.0383783	0.346461	0.726765		-0.0521933	0.329913	0.753632
NCKAP5L	12	FALSE	NA		0.126231	0.00416132	0.275726		-0.0194185	0.62476	0.87969		-0.149466	0.00233762	0.209479
GPBAR1	2	FALSE	NA		0.121344	0.00422347	0.275726		0.0272739	0.53897	0.84202		-0.0646844	0.20887	0.664814
ZNF783	7	FALSE	NA		0.117376	0.0042417	0.275726		0.0468449	0.19673	0.611029		-0.0304631	0.520305	0.855141
LPP	3	FALSE	NA		-0.14072	0.00425534	0.275726		-0.0144251	0.742543	0.924058		0.0278625	0.58414	0.883184
CLCF1	11	FALSE	NA		-0.222668	0.00427117	0.275726		-0.117996	0.0838441	0.478678		0.0303623	0.693628	0.920738
BRD4	19	FALSE	NA		0.045259	0.00428141	0.275726		0.0105405	0.487621	0.813918		-0.0351155	0.0623009	0.508402
STUM	1	FALSE	NA		0.13432	0.0043111	0.275726		0.0359377	0.442239	0.787645		-0.0378465	0.467693	0.830357
BCKDHB	6	FALSE	NA		-0.074658	0.00431804	0.275726		-0.0145473	0.587885	0.863312		0.0337594	0.273615	0.717597
RGPD1	2	FALSE	NA		-0.330545	0.0043186	0.275726		-0.0275791	0.763374	0.931426		0.266471	0.0363117	0.453643
CDC20B	5	FALSE	NA		-0.0830015	0.00432229	0.275726		-0.0459228	0.101946	0.50644		0.0861196	0.0152565	0.353842
TMEM107	17	FALSE	NA		-0.0816399	0.0043257	0.275726		-0.0453173	0.114362	0.527405		0.0450458	0.192014	0.650229
UBAP1L	15	FALSE	NA		0.174771	0.0043638	0.275726		0.114619	0.0492847	0.398954		-0.00729397	0.918125	0.982636
STAT4	2	FALSE	NA		-0.253972	0.00436524	0.275726		-0.00910558	0.906745	0.975661		0.171392	0.0859578	0.547666
ARHGAP29	1	FALSE	NA		-0.222909	0.00436846	0.275726		-0.157012	0.036105	0.35477		-0.0483378	0.569542	0.877854
ANXA10	4	FALSE	NA		-0.259227	0.00436859	0.275726		-0.0731479	0.434591	0.783379		0.112429	0.351788	0.770256
ARHGDIG	16	FALSE	NA		0.222357	0.00440318	0.275726		0.129497	0.110789	0.521026		-0.0156245	0.8622	0.967303
GRIPAP1	X	FALSE	Inactive		0.0419026	0.00440633	0.275726		0.0253722	0.0909459	0.489495		-0.0156458	0.40076	0.798883
PTPN12	7	FALSE	NA		-0.0657261	0.00444023	0.275726		-0.0107893	0.624417	0.87969		-0.00263792	0.919562	0.983077
DHRS3	1	FALSE	NA		-0.233421	0.00445788	0.275726		-0.0969741	0.194018	0.607854		0.0792835	0.364967	0.776976
MPHOSPH6	16	FALSE	NA		-0.0501109	0.00445926	0.275726		-0.0109896	0.530594	0.836891		0.0543048	0.0115349	0.326115
CD58	1	FALSE	NA		-0.0990317	0.00447418	0.275726		-0.0240028	0.494895	0.817231		0.0288951	0.470604	0.831529
NDUFA1	X	FALSE	Inactive		-0.048156	0.00447526	0.275726		-0.00772066	0.636277	0.884011		0.0452357	0.0228293	0.398428
RAP2C	X	FALSE	Inactive		-0.0600542	0.00448388	0.275726		0.0162839	0.427367	0.77962		0.0531886	0.029525	0.429012
CHRNA3	15	FALSE	NA		0.21075	0.00448945	0.275726		0.155318	0.0343901	0.348644		-0.143352	0.109652	0.57354
CHMP4C	8	FALSE	NA		-0.224307	0.00449093	0.275726		-0.223061	0.00367279	0.151144		0.11443	0.173033	0.633065
ARRDC3	5	FALSE	NA		-0.128082	0.0045003	0.275726		-0.0924968	0.017107	0.270677		0.091004	0.058787	0.501838
PI4K2B	4	FALSE	NA		-0.0667927	0.00451803	0.275931		-0.0106785	0.651053	0.889933		0.0754073	0.00780617	0.299398
IL20RB	3	FALSE	NA		-0.238338	0.0045751	0.277797		0.123565	0.119304	0.533473		0.210771	0.050009	0.486372
ALOXE3	17	FALSE	NA		-0.17417	0.00457755	0.277797		-0.0921591	0.145354	0.566805		0.172151	0.021964	0.397574
RPRML	17	FALSE	NA		0.163398	0.00464717	0.280423		0.00615467	0.913187	0.977894		-0.127315	0.0500397	0.486372
STOX1	10	FALSE	NA		-0.224606	0.00466342	0.280423		-0.182268	0.0149224	0.263262		0.108913	0.245246	0.696135
C1D	2	FALSE	NA		-0.0417683	0.00467869	0.280423		-0.0496393	0.000479165	0.060854		0.00754658	0.659149	0.910255
GPC3	X	FALSE	Inactive		0.301707	0.00467933	0.280423		0.280489	0.00768244	0.20542		0.0700069	0.537557	0.864826
MT4	16	FALSE	NA		-0.109477	0.00471608	0.28144		-0.0911812	0.0122502	0.245221		0.0831157	0.0657138	0.512308
RAB22A	20	FALSE	NA		-0.0584475	0.00475884	0.28144		-0.0331598	0.0870275	0.484531		0.0507957	0.0340849	0.444997
CNTFR	9	FALSE	NA		0.168186	0.00476366	0.28144		0.132092	0.0486771	0.397564		-0.0231379	0.756412	0.935753
PDLIM1	10	FALSE	NA		-0.178183	0.00478531	0.28144		-0.0761613	0.167147	0.585586		0.112093	0.093993	0.552916
LRRC4	7	FALSE	NA		0.207188	0.00480445	0.28144		0.130169	0.060195	0.42897		-0.139448	0.0827236	0.544642
CIDEA	18	FALSE	NA		-0.0682498	0.00482238	0.28144		-0.100767	0.00227011	0.125097		-0.0189298	0.645241	0.905973
COL12A1	6	FALSE	NA		-0.285576	0.00483656	0.28144		0.0851837	0.409934	0.771017		0.210107	0.0757742	0.532865
FOXO6	1	FALSE	NA		0.239795	0.00487856	0.28144		0.100341	0.23176	0.64366		-0.168424	0.0941542	0.553183
DPCD	10	FALSE	NA		-0.0940707	0.0048885	0.28144		-0.0905133	0.00289272	0.139508		0.0257071	0.484264	0.838205
UBE2D1	10	FALSE	NA		-0.0630936	0.00488875	0.28144		-0.0021724	0.92054	0.980088		0.0509251	0.052523	0.497125
SEC31B	10	FALSE	NA		0.157791	0.00489099	0.28144		0.164612	0.00443069	0.162401		-0.0359567	0.591938	0.885701
TSHZ1	18	FALSE	NA		0.141258	0.00490313	0.28144		0.0377152	0.43529	0.78344		-0.14586	0.0146066	0.351121
NHLH1	1	FALSE	NA		0.144737	0.00491501	0.28144		0.138	0.00294589	0.139508		-0.0851584	0.133489	0.59505
FANK1	10	FALSE	NA		-0.244609	0.00492381	0.28144		-0.105754	0.185246	0.600513		0.0767583	0.437091	0.817256
GPR19	12	FALSE	NA		0.22955	0.00492493	0.28144		-0.00190516	0.979022	0.995794		-0.290241	0.00125377	0.156872
TMEM120B	12	FALSE	NA		0.0766339	0.0049311	0.28144		0.0199798	0.407818	0.770136		-0.0875267	0.00409468	0.25315
ITGB5	3	FALSE	NA		-0.140794	0.00496539	0.282556		-0.10337	0.0148734	0.263262		-0.0327746	0.499251	0.844039
DAZ4	Y	FALSE	NA		0.107497	0.00513229	0.291189		0.0951009	0.00288578	0.139508		0.0270472	0.474907	0.834525
TIMM23	10	FALSE	NA		-0.0459136	0.00517306	0.292139		-0.0216897	0.162145	0.581643		0.0438567	0.0216171	0.39481
GPRC5B	16	FALSE	NA		0.268572	0.00517949	0.292139		0.311825	0.00112389	0.0898035		-0.00413966	0.971123	0.993043
RBMY1B	Y	FALSE	NA		0.114693	0.00522138	0.293637		0.111967	0.000215607	0.037933		0.0234591	0.51172	0.851402
SARM1	17	FALSE	NA		0.183807	0.00531713	0.298148		0.310316	8.45e-06	0.00480167		0.117966	0.175683	0.636693
KIAA0408	6	FALSE	NA		0.25813	0.00534402	0.298743		0.10664	0.223291	0.633653		-0.092777	0.373563	0.782075
CCN1	1	FALSE	NA		-0.199293	0.0053707	0.298743		-0.10669	0.0782877	0.467488		0.00763372	0.918069	0.982636
HDAC8	X	FALSE	Inactive		-0.0455432	0.00537448	0.298743		-0.0254441	0.108502	0.518589		0.0120193	0.532192	0.862655
UCN	2	FALSE	NA		0.176453	0.00541894	0.29949		0.106896	0.0894637	0.487734		-0.143018	0.0618522	0.507907
UCP3	11	FALSE	NA		0.151835	0.00542991	0.29949		0.111709	0.0403514	0.36914		-0.0576706	0.391513	0.793717
NKAP	X	FALSE	Inactive		-0.0739838	0.00543476	0.29949		0.0179538	0.486038	0.812972		0.10978	0.000433409	0.0933876
ATP5MD	10	FALSE	NA		-0.0482866	0.00550533	0.301104		-0.0369799	0.0250465	0.3123		0.0385459	0.0571785	0.499728
LDLRAP1	1	FALSE	NA		-0.108173	0.00552817	0.301104		0.0120918	0.743377	0.924539		0.0440521	0.27945	0.720146
TRIM65	17	FALSE	NA		0.0644543	0.00554309	0.301104		0.0402162	0.0864838	0.484516		-0.0460122	0.112257	0.575657
MBTD1	17	FALSE	NA		0.076419	0.00555104	0.301104		0.0452862	0.0894996	0.487734		-0.0435658	0.176734	0.636834
ANKRD13B	17	FALSE	NA		0.13101	0.00555611	0.301104		0.150264	0.00123188	0.0938836		-0.0131048	0.821789	0.954482
RAB5A	3	FALSE	NA		-0.0511049	0.00555826	0.301104		-0.0221597	0.191177	0.607365		0.0267173	0.192027	0.650229
MYH7B	20	FALSE	NA		0.130659	0.00561546	0.303346		-0.0465641	0.377986	0.748939		-0.180783	0.00386496	0.249557
PDIA2	16	FALSE	NA		0.221779	0.00563349	0.303465		0.091343	0.257438	0.663868		-0.119643	0.197864	0.654968
DCDC2	6	FALSE	NA		-0.250644	0.0056778	0.304995		-0.144438	0.0934877	0.492916		0.273507	0.00939672	0.312306
ABCD3	1	FALSE	NA		-0.0508708	0.00572845	0.306856		-0.0125717	0.474241	0.806795		0.0516729	0.0165446	0.360392
NTN4	12	FALSE	NA		-0.219113	0.00582192	0.310994		0.0349986	0.627763	0.880789		0.0898976	0.308618	0.739057
DNMT3A	2	FALSE	NA		0.122205	0.00585599	0.311945		0.00634535	0.881809	0.968777		-0.132971	0.0119211	0.326586
MB	22	FALSE	NA		-0.291628	0.005885	0.312224		0.0244665	0.804917	0.946059		0.261845	0.0358334	0.451445
RSAD1	17	FALSE	NA		0.0611999	0.0059057	0.312224		0.0326866	0.120516	0.535107		-0.0268231	0.300428	0.733645
RFX3	9	FALSE	NA		0.148341	0.00591006	0.312224		0.0687986	0.172661	0.590203		-0.0781469	0.211977	0.667392
OTUD1	10	FALSE	NA		-0.183611	0.00594723	0.312548		-0.0669411	0.277059	0.676337		0.0212514	0.768708	0.940097
CHERP	19	FALSE	NA		0.0449947	0.00594879	0.312548		0.00595196	0.693701	0.907304		-0.0110692	0.557176	0.872777
AHNAK2	14	FALSE	NA		-0.204653	0.00596783	0.312692		-0.158792	0.0256708	0.314763		-0.0112305	0.891786	0.973412
S100A12	1	FALSE	NA		-0.187245	0.00601015	0.314051		-0.0926345	0.0997772	0.502669		0.164826	0.0167098	0.360569
INPP5A	10	FALSE	NA		-0.0902524	0.00604948	0.315247		-0.0904623	0.00299765	0.139526		-0.0161601	0.645705	0.906227
RSPH1	21	FALSE	NA		-0.218807	0.00610423	0.316406		0.0258301	0.730231	0.920061		0.281852	0.00212292	0.20423
ANAPC13	3	FALSE	NA		-0.0388164	0.00611138	0.316406		-0.0100855	0.466449	0.803308		0.0120734	0.479637	0.836596
DPY19L3	19	FALSE	NA		0.0790767	0.00612566	0.316406		0.0346515	0.279962	0.67878		-0.0367214	0.351024	0.769982
PSMD14	2	FALSE	NA		-0.0378301	0.00616028	0.316406		-0.0115395	0.389777	0.756708		0.0463477	0.00534582	0.260739
SLC30A1	1	FALSE	NA		-0.0994926	0.00616479	0.316406		-0.0545509	0.0958206	0.496266		0.0739462	0.0640785	0.510737
DAD1	14	FALSE	NA		-0.035849	0.00617071	0.316406		-0.0372285	0.00299641	0.139526		0.0196268	0.202866	0.659031
DNAJB12	10	FALSE	NA		-0.0468623	0.00619651	0.316672		-0.0175527	0.295653	0.690957		0.00859429	0.672424	0.914106
FAM193B	5	FALSE	NA		0.0609144	0.00620893	0.316672		0.026923	0.203918	0.616037		-0.0214937	0.423961	0.811701
G6PC3	17	FALSE	NA		0.0702567	0.00624498	0.317076		0.0135034	0.586585	0.862781		-0.0122667	0.702917	0.923541
ATP6V0D1	16	FALSE	NA		-0.0477643	0.00625436	0.317076		-0.0178077	0.282345	0.680987		0.0454072	0.0259712	0.411611
NAALAD2	11	FALSE	NA		0.173413	0.00626646	0.317076		0.0673078	0.291936	0.687613		-0.128306	0.0962061	0.55567
EML6	2	FALSE	NA		0.229624	0.00633096	0.318532		0.021424	0.777827	0.936312		-0.279473	0.00273916	0.21848
TMA7	3	FALSE	NA		-0.0455073	0.00633841	0.318532		-0.00400432	0.802135	0.945048		0.055837	0.00400748	0.25315
PPP2R5A	1	FALSE	NA		-0.0658486	0.00634608	0.318532		-0.0572263	0.0130312	0.253694		0.0435149	0.122246	0.58183
SPOCD1	1	FALSE	NA		-0.270938	0.00642	0.318532		0.0233085	0.824027	0.952924		0.2087	0.0790596	0.53921
MYOF	10	FALSE	NA		-0.203714	0.00642512	0.318532		-0.162618	0.0147971	0.263262		-0.030402	0.697934	0.92241
CPM	12	FALSE	NA		-0.326347	0.00643387	0.318532		-0.197342	0.0752157	0.461276		0.11194	0.388426	0.792216
CYP2S1	19	FALSE	NA		-0.258274	0.00643451	0.318532		-0.22043	0.0227906	0.301002		0.141388	0.228959	0.681054
SLC2A2	3	FALSE	NA		-0.0836951	0.00644315	0.318532		-0.0348418	0.262833	0.667418		0.119725	0.00142364	0.164465
LRRC7	1	FALSE	NA		0.204896	0.00644473	0.318532		0.16618	0.0267965	0.320623		-0.107177	0.214835	0.670288
TPRG1L	1	FALSE	NA		-0.0707448	0.00647462	0.318613		-0.0514742	0.0336622	0.346599		0.0644259	0.0302334	0.429327
IFT52	20	FALSE	NA		-0.0486364	0.00647959	0.318613		-0.0352254	0.0395508	0.365879		0.0245357	0.246073	0.696729
PROSER3	19	FALSE	NA		0.0777577	0.00651826	0.319695		-0.00401511	0.873515	0.966887		-0.0838435	0.00913496	0.308962
CCDC115	2	FALSE	NA		-0.0507307	0.00655083	0.319982		-0.0516976	0.00361638	0.151144		0.047453	0.0305427	0.429727
SYP	X	FALSE	Inactive		0.240222	0.00655749	0.319982		0.266935	0.00111564	0.0895172		0.0787308	0.443723	0.820128
MLLT6	17	FALSE	NA		0.065652	0.0066198	0.322203		0.0526453	0.0176475	0.274254		-0.0559144	0.0400563	0.469422
SLX4	16	FALSE	NA		0.0946218	0.00670735	0.32345		0.0521234	0.120417	0.534946		-0.0797877	0.0543829	0.497125
PSMD10	X	FALSE	Inactive		-0.0381254	0.00670762	0.32345		-0.0176469	0.310469	0.702356		0.0570219	0.0089987	0.308157
B3GNT6	11	FALSE	NA		-0.103401	0.00671738	0.32345		-0.0767321	0.0547287	0.41252		0.0691143	0.168648	0.629398
IRF1	5	FALSE	NA		-0.105591	0.00672683	0.32345		-0.0104062	0.777581	0.9363		0.044294	0.313738	0.743027
ARPC3	12	FALSE	NA		-0.0411429	0.00672976	0.32345		-0.0374935	0.00823147	0.21303		0.0420027	0.0164075	0.360392
TNRC6B	22	FALSE	NA		0.0895115	0.00676149	0.324163		-0.0237087	0.444177	0.788594		-0.102983	0.00787827	0.301049
SCARA5	8	FALSE	NA		-0.176584	0.00683964	0.327092		-0.0923618	0.115283	0.527405		0.132803	0.0847317	0.547119
CIDEC	3	FALSE	NA		-0.1189	0.00685832	0.327169		-0.0818256	0.0928228	0.491916		0.0915922	0.12718	0.587696
RGPD2	2	FALSE	NA		-0.265598	0.00688133	0.327452		0.0372185	0.677736	0.900751		0.239361	0.0351569	0.450654
LRRC8E	19	FALSE	NA		-0.200471	0.00695387	0.330085		-0.10055	0.115773	0.527405		0.117455	0.137468	0.598462
NSUN4	1	FALSE	NA		0.0495574	0.00697142	0.330101		-0.00603665	0.72357	0.917993		-0.0637953	0.00300593	0.226058
CCDC200	17	FALSE	NA		0.193692	0.00711331	0.33599		0.076061	0.273587	0.673935		-0.20464	0.0128345	0.33675
CBFA2T3	16	FALSE	NA		0.207816	0.00713626	0.336246		0.108376	0.146828	0.569149		-0.100788	0.247244	0.69786
SCP2	1	FALSE	NA		-0.046727	0.00717699	0.336696		-0.0232462	0.155907	0.577442		0.0291246	0.146098	0.60733
IGFBP1	7	FALSE	NA		-0.191765	0.00720122	0.336696		-0.0696412	0.34887	0.728626		0.0384503	0.683183	0.916897
DOCK2	5	FALSE	NA		0.185244	0.0072114	0.336696		0.160592	0.046467	0.389365		-0.121523	0.160542	0.620958
ERICH1	8	FALSE	NA		0.0739117	0.00721822	0.336696		0.0875425	0.00828826	0.213883		-0.0184493	0.646923	0.906677
ARPC2	2	FALSE	NA		-0.0354631	0.0072336	0.336696		-0.0174879	0.165664	0.584399		0.0221707	0.148987	0.608901
H2AJ	12	FALSE	NA		-0.264921	0.00727503	0.337804		-0.253111	0.00309405	0.140634		0.0625554	0.539657	0.866167
ZNF337	20	FALSE	NA		0.0771998	0.00736178	0.339942		0.0971872	0.000533788	0.0624174		-0.0145183	0.678732	0.915435
GPX4	19	FALSE	NA		-0.0449652	0.00736594	0.339942		-0.0364135	0.0156882	0.267188		0.0297434	0.108812	0.571931
XAB2	19	FALSE	NA		0.039755	0.00739377	0.339942		-0.0329497	0.0148276	0.263262		-0.050743	0.0026705	0.21848
NRCAM	7	FALSE	NA		0.355476	0.00739457	0.339942		0.193522	0.119603	0.533692		-0.151798	0.350236	0.769982
TSPY3	Y	FALSE	NA		0.119061	0.00742097	0.339942		0.118528	0.000399384	0.0539365		0.0295141	0.455466	0.825642
PKN1	19	FALSE	NA		0.0621363	0.00742743	0.339942		0.0242601	0.281881	0.680725		-0.0195728	0.48368	0.838205
POLR3D	8	FALSE	NA		0.0588995	0.00748579	0.341257		0.0191848	0.355133	0.732265		-0.0625042	0.0122466	0.332676
MT1B	16	FALSE	NA		-0.0978193	0.00750402	0.341257		-0.0196338	0.5596	0.851837		0.0579058	0.180736	0.641014
PWWP3A	19	FALSE	NA		0.0545418	0.00750953	0.341257		0.0260433	0.174781	0.59229		-0.0165766	0.492339	0.841606
LEUTX	19	FALSE	NA		-0.0452699	0.00754649	0.342095		-0.0161478	0.311179	0.703133		0.0326697	0.102849	0.566099
TXK	4	FALSE	NA		-0.215153	0.00756367	0.342095		-0.0687128	0.372615	0.74455		0.0582339	0.550642	0.869905
GPATCH8	17	FALSE	NA		0.0444224	0.00760277	0.343055		0.0349124	0.0259183	0.315577		-0.0424144	0.0264242	0.414339
CLVS2	6	FALSE	NA		0.133059	0.00763514	0.343212		0.103167	0.0127081	0.249952		-0.0208782	0.651553	0.908319
PPM1D	17	FALSE	NA		0.0676362	0.00764734	0.343212		0.0715761	0.00379305	0.153148		0.0332994	0.269581	0.713956
CHMP4B	20	FALSE	NA		-0.037213	0.00767745	0.343212		-0.0132743	0.330469	0.715606		0.0315238	0.0599342	0.503019
RAB2A	8	FALSE	NA		-0.0381022	0.00769308	0.343212		-0.0174658	0.211235	0.623112		0.0418358	0.0157977	0.355995
PLA2G4B	15	FALSE	NA		0.145943	0.00769573	0.343212		0.0339758	0.481974	0.811229		-0.0651653	0.302176	0.734776
YWHAB	20	FALSE	NA		-0.0298094	0.00775036	0.343569		-0.0202596	0.0735945	0.457924		0.0273422	0.0506725	0.48966
KAT2A	17	FALSE	NA		0.0555279	0.00777678	0.343569		0.0413111	0.0308564	0.339259		-0.00406906	0.865886	0.968361
GAMT	19	FALSE	NA		0.162023	0.00777997	0.343569		0.0775061	0.167553	0.585586		-0.0300313	0.676035	0.915073
FAM222A	12	FALSE	NA		0.203848	0.00780568	0.343569		0.0854323	0.239397	0.648841		-0.0723439	0.427278	0.813399
CAMK2B	7	FALSE	NA		0.204955	0.00781552	0.343569		0.161308	0.0341942	0.348509		-0.0163363	0.849926	0.963829
QSOX2	9	FALSE	NA		0.0568834	0.00782128	0.343569		0.0379843	0.0558014	0.415574		-0.059525	0.0157907	0.355995
DDX25	11	FALSE	NA		0.160111	0.00784201	0.343569		0.121766	0.0364465	0.355672		0.0216128	0.737614	0.932331
KCNAB2	1	FALSE	NA		0.144484	0.00785833	0.343569		0.00948534	0.867253	0.965287		-0.128914	0.0484119	0.483971
SENP7	3	FALSE	NA		0.0997829	0.0078687	0.343569		0.0479707	0.169707	0.587397		-0.13709	0.00104047	0.149777
LHCGR	2	FALSE	NA		-0.0719189	0.00788578	0.343569		-0.0138262	0.548297	0.846819		0.0754671	0.0103995	0.3196
PTX4	16	FALSE	NA		-0.0580681	0.0079156	0.343569		-0.0449535	0.045951	0.387001		0.0191848	0.50225	0.845772
PTPN4	2	FALSE	NA		-0.0706626	0.00791872	0.343569		-0.0593035	0.0156761	0.267188		0.0168787	0.567388	0.877127
SLC37A2	11	FALSE	NA		0.259629	0.00805545	0.348712		0.00913422	0.920599	0.980088		-0.505824	7.75e-06	0.00479433
FUCA1	1	FALSE	NA		-0.113933	0.00809853	0.349742		0.050205	0.283526	0.681851		0.164857	0.00294884	0.225298
SECISBP2	9	FALSE	NA		0.0517872	0.00812238	0.349742		0.0314174	0.0681424	0.444719		-0.0508609	0.0161893	0.358916
TXNRD2	22	FALSE	NA		-0.0831872	0.00814993	0.349742		-0.117048	8.04e-05	0.0226862		-0.059701	0.0912422	0.550984
ANKRD40	17	FALSE	NA		0.0392509	0.00823282	0.349742		0.0434266	0.00273586	0.136739		-0.0167116	0.346093	0.767389
BTNL8	5	FALSE	NA		-0.133852	0.0082453	0.349742		-0.0159452	0.740126	0.923448		0.112208	0.0788388	0.538925
PGS1	17	FALSE	NA		0.0522201	0.00824641	0.349742		0.0162703	0.380101	0.750381		-0.0465258	0.0442104	0.480306
DKK3	11	FALSE	NA		-0.231483	0.00826611	0.349742		-0.114053	0.182279	0.597481		0.00318293	0.974292	0.993607
ARSL	X	FALSE	NA		-0.261618	0.00827102	0.349742		-0.0285491	0.748127	0.926031		0.138007	0.260253	0.706179
FSD1	19	FALSE	NA		0.224356	0.00827215	0.349742		-0.00817543	0.919335	0.979606		-0.167133	0.129269	0.591123
CDA	1	FALSE	NA		-0.270625	0.00828259	0.349742		-0.0577432	0.580372	0.859378		-0.0750894	0.544	0.868327
CLIP3	19	FALSE	NA		0.189477	0.00829844	0.349742		0.103588	0.128067	0.545672		0.0231736	0.789404	0.946978
WDR13	X	FALSE	Inactive		0.0524744	0.00832614	0.349742		0.018676	0.304457	0.698309		-0.00814935	0.726985	0.929995
TRAPPC2L	16	FALSE	NA		-0.0472503	0.00832961	0.349742		-0.0350488	0.0400739	0.368575		0.0248114	0.237851	0.689554
LEPROT	1	FALSE	NA		-0.06141	0.00833458	0.349742		-0.0040865	0.84555	0.95975		0.0230952	0.363661	0.776607
C11orf86	11	FALSE	NA		-0.157363	0.00839927	0.350017		-0.102937	0.0835592	0.478047		0.118993	0.12282	0.582568
PGRMC2	4	FALSE	NA		-0.0433937	0.00843822	0.350017		0.00981184	0.554663	0.849517		0.0581882	0.00431447	0.254288
SUMO1	2	FALSE	NA		-0.0374865	0.00843889	0.350017		-0.0218988	0.104177	0.510166		0.0364491	0.027252	0.418194
GLS2	12	FALSE	NA		-0.22501	0.0084468	0.350017		-0.017148	0.836593	0.957297		0.147657	0.148537	0.608715
REV3L	6	FALSE	NA		0.0708861	0.00847799	0.350017		0.0467587	0.0717923	0.453628		-0.0242353	0.443308	0.820116
CHCHD1	10	FALSE	NA		-0.0453417	0.00851064	0.350017		-0.0213249	0.19352	0.607596		0.0285282	0.153574	0.61395
PCDHA3	5	FALSE	NA		0.131352	0.00854018	0.350017		0.0591803	0.260137	0.666069		-0.0543919	0.379458	0.786185
CXCR1	2	FALSE	NA		-0.0576788	0.00855911	0.350017		-0.0148096	0.388967	0.756307		0.066803	0.00191211	0.195709
S100A3	1	FALSE	NA		-0.242457	0.00856056	0.350017		-0.165559	0.051964	0.405954		0.0862805	0.393079	0.79493
CLDN16	3	FALSE	NA		-0.199383	0.00858978	0.350017		-0.03528	0.617898	0.877085		0.129548	0.159538	0.618806
MYO19	17	FALSE	NA		0.0507479	0.00859813	0.350017		-0.012853	0.455065	0.795843		-0.0546789	0.0127651	0.33675
TRIP10	19	FALSE	NA		-0.126339	0.00860596	0.350017		-0.118096	0.00226845	0.125097		-0.00155689	0.972734	0.993347
VSX1	20	FALSE	NA		-0.11944	0.00861078	0.350017		-0.112595	0.0139071	0.258678		0.0625761	0.279356	0.720146
EVI5	1	FALSE	NA		-0.0822175	0.00862919	0.350017		-0.0122454	0.690292	0.906277		0.0226307	0.519279	0.854929
ITGB1	10	FALSE	NA		-0.0643032	0.0086549	0.350017		-0.0368271	0.19744	0.611084		0.0563108	0.112159	0.575657
FRMD3	9	FALSE	NA		0.268013	0.0086551	0.350017		0.233347	0.0196172	0.286832		-0.183063	0.135162	0.59505
VWCE	11	FALSE	NA		0.226675	0.00866311	0.350017		0.0815623	0.327204	0.714615		0.0517857	0.598643	0.888445
HSD11B1L	19	FALSE	NA		0.148475	0.00868398	0.350017		-0.00545547	0.921326	0.980481		-0.10625	0.123784	0.583714
NAPB	20	FALSE	NA		0.0867645	0.00868791	0.350017		0.0826982	0.00647733	0.188778		-0.0908983	0.0144189	0.351121
SEC13	3	FALSE	NA		-0.0388435	0.00875858	0.351261		-0.0252671	0.0756268	0.462232		0.0276783	0.110139	0.573949
ZNF652	17	FALSE	NA		0.0781896	0.00878285	0.351261		0.0633988	0.0175515	0.273869		0.0325088	0.349524	0.769982
KATNIP	16	FALSE	NA		0.0664524	0.00879073	0.351261		0.00540223	0.810041	0.947079		-0.0881045	0.00218695	0.20423
NOMO3	16	FALSE	NA		0.0888461	0.00881282	0.351261		0.0893713	0.00552833	0.176442		-0.0267606	0.51563	0.853391
ZKSCAN8	6	FALSE	NA		0.0778295	0.00882759	0.351261		0.0775755	0.011187	0.237809		-0.0576969	0.109909	0.57354
MYADML2	17	FALSE	NA		0.105572	0.00885618	0.351261		0.0756449	0.0423558	0.376568		-0.0487322	0.279272	0.720146
GOLGA6L7	15	FALSE	NA		0.0767497	0.00886896	0.351261		-0.0174792	0.615198	0.875686		-0.0823164	0.0476849	0.483971
ZNF213	16	FALSE	NA		0.0739477	0.00889203	0.351261		0.0649016	0.0178737	0.275584		-0.0250009	0.469194	0.83051
TST	22	FALSE	NA		-0.123135	0.0089105	0.351261		-0.0153376	0.736564	0.92213		0.139832	0.0112372	0.324667
WSB2	12	FALSE	NA		-0.0587143	0.00891168	0.351261		-0.0476468	0.0200633	0.288638		0.0456748	0.066748	0.513974
B3GAT3	11	FALSE	NA		0.0475027	0.00892028	0.351261		0.0326401	0.0631923	0.43404		-0.0517479	0.0161522	0.358735
IFNLR1	1	FALSE	NA		-0.278316	0.00904572	0.353221		-0.0664438	0.487015	0.81385		0.231873	0.047675	0.483971
HINFP	11	FALSE	NA		0.0506771	0.00905082	0.353221		0.0339704	0.0741325	0.458651		-0.0392725	0.0884044	0.549644
UBE2L3	22	FALSE	NA		-0.0372182	0.00906892	0.353221		-0.0263519	0.0683718	0.445672		0.0206301	0.244769	0.695937
SERPINB9	6	FALSE	NA		-0.307597	0.00909843	0.353221		-0.20513	0.0785151	0.467888		0.0715676	0.607058	0.89098
FAM25A	10	FALSE	NA		-0.191588	0.00913004	0.353221		-0.0706604	0.322292	0.711721		0.0838136	0.363998	0.776722
HROB	17	FALSE	NA		0.0827103	0.00915552	0.353221		0.0264188	0.361493	0.73631		-0.0685784	0.0587049	0.501838
CUL4B	X	FALSE	Inactive		-0.0581419	0.0091778	0.353221		0.0218766	0.330399	0.715606		0.0501584	0.0610285	0.506642
GPAT4	8	FALSE	NA		0.0506598	0.00918371	0.353221		-0.00951458	0.608537	0.872956		-0.0258517	0.267317	0.711886
C2orf76	2	FALSE	NA		-0.0691736	0.00919595	0.353221		-0.0312464	0.218227	0.628725		0.0879699	0.00406754	0.25315
LCN8	9	FALSE	NA		-0.0899308	0.00920227	0.353221		-0.0636445	0.0308281	0.339259		0.0715544	0.0537934	0.497125
CALM2	2	FALSE	NA		-0.0316732	0.00924579	0.353221		-0.0182717	0.124633	0.540131		0.0181684	0.212048	0.667505
CYB5RL	1	FALSE	NA		0.0774574	0.00925109	0.353221		0.0724896	0.0129339	0.252323		-0.0694179	0.0473378	0.483971
FMR1NB	X	FALSE	Variable		-0.112974	0.00928268	0.353221		-0.088157	0.0657751	0.440576		0.0708566	0.251327	0.70001
STK31	7	FALSE	NA		-0.147099	0.00929725	0.353221		-0.195104	0.00226904	0.125097		0.137305	0.0485665	0.483971
AVPR2	X	FALSE	Variable		0.154156	0.00930032	0.353221		-0.102172	0.1097	0.520256		-0.201891	0.00632796	0.275889
ARSD	X	FALSE	Escape		-0.239003	0.00930458	0.353221		-0.0277516	0.75479	0.92911		0.317613	0.00274465	0.21848
UGT1A6	2	FALSE	NA		-0.283178	0.00930841	0.353221		-0.0917137	0.385571	0.754625		0.126366	0.366185	0.777346
SSBP3	1	FALSE	NA		0.0841362	0.00931122	0.353221		0.0609465	0.0433645	0.37938		0.00116696	0.975384	0.993705
MUC22	6	FALSE	NA		-0.0539175	0.00932001	0.353221		-0.0220671	0.201785	0.615008		0.0586227	0.00669114	0.282013
P2RY13	3	FALSE	NA		-0.0629013	0.00937012	0.35442		-0.0375561	0.10996	0.520283		0.0245774	0.406629	0.802506
PSMB1	6	FALSE	NA		-0.0347823	0.00943594	0.356207		-0.0207183	0.113387	0.525603		0.0350577	0.0301464	0.429327
ANKDD1A	15	FALSE	NA		0.144729	0.00947489	0.356911		0.165069	0.00306198	0.140477		-0.0696816	0.302121	0.734776
TRIM9	14	FALSE	NA		0.254986	0.00949182	0.356911		-0.146876	0.120693	0.5354		-0.222307	0.048923	0.483971
CDH13	16	FALSE	NA		-0.299286	0.00958348	0.358465		-0.0482616	0.66288	0.895256		0.18687	0.166371	0.627041
CELF1	11	FALSE	NA		0.0334974	0.00960473	0.358465		0.00428363	0.718076	0.916099		-0.031433	0.033205	0.441798
LGALS4	19	FALSE	NA		-0.29117	0.00963172	0.358465		0.17279	0.0980044	0.500781		0.544117	1.57e-05	0.0083701
ERICH5	8	FALSE	NA		-0.252651	0.00964336	0.358465		0.0500892	0.566748	0.85457		0.405816	0.000189354	0.0605207
APBA3	19	FALSE	NA		0.0513496	0.00964901	0.358465		0.00571461	0.761359	0.931041		-0.0214878	0.366915	0.77767
MGST3	1	FALSE	NA		-0.0840229	0.00968128	0.358465		-0.0388589	0.153674	0.575217		0.0524022	0.111395	0.575301
ST3GAL6	3	FALSE	NA		0.254827	0.0096838	0.358465		0.0460329	0.612023	0.873932		-0.370952	0.000475947	0.0970724
TEC	4	FALSE	NA		-0.201441	0.00968843	0.358465		-0.16012	0.026679	0.320165		0.0582636	0.491971	0.841591
CREB3	9	FALSE	NA		-0.0513065	0.00971294	0.358465		-0.00556708	0.759759	0.930687		0.0664737	0.00320418	0.234646
PRPH	12	FALSE	NA		0.234135	0.00974106	0.358465		0.144261	0.123081	0.538762		-0.238218	0.0311469	0.431788
MGAT4C	12	FALSE	NA		0.144823	0.00976764	0.358465		0.0536361	0.3331	0.71705		-0.0666227	0.28769	0.725917
LZTS1	8	FALSE	NA		0.257087	0.00978484	0.358465		0.149404	0.0963482	0.496966		-0.174438	0.0910871	0.550984
SEMA3C	7	FALSE	NA		-0.201814	0.00978687	0.358465		-0.0586028	0.404237	0.767327		0.100294	0.240749	0.692661
ARHGAP4	X	FALSE	Variable		0.145211	0.00979666	0.358465		0.005224	0.939327	0.983537		0.033905	0.673941	0.914845
RARA	17	FALSE	NA		0.0762276	0.00981408	0.358465		0.0271386	0.313557	0.705454		-0.0615881	0.0657219	0.512308
IL1RAPL1	X	FALSE	Variable		-0.183342	0.00983222	0.358465		0.00655769	0.919071	0.979495		0.0224474	0.810811	0.952184
MSS51	10	FALSE	NA		0.117541	0.00994788	0.36175		0.0961763	0.036185	0.35477		-0.089752	0.113286	0.575742
TBC1D19	4	FALSE	NA		-0.111847	0.00996608	0.36175		0.022615	0.604931	0.871189		0.124389	0.014604	0.351121
PTGR1	9	FALSE	NA		-0.154486	0.00997892	0.36175		-0.0633332	0.314677	0.705822		0.0196726	0.799458	0.949125
YWHAZ	8	FALSE	NA		-0.0320841	0.0100205	0.362302		-0.0213917	0.0761553	0.462965		0.0154315	0.295077	0.730944
CLN8	8	FALSE	NA		0.0849477	0.0100481	0.362302		0.109396	0.00276742	0.136887		-0.014456	0.754252	0.935038
HAUS5	19	FALSE	NA		0.0709075	0.0100612	0.362302		-0.030157	0.212098	0.624027		-0.0633016	0.0412318	0.472256
TEN1.CDK3	17	FALSE	NA		0.112568	0.0101004	0.362302		0.0252616	0.529326	0.836238		-0.0943796	0.0613344	0.507444
MRPL13	8	FALSE	NA		-0.048976	0.0101184	0.362302		-0.0498117	0.00509889	0.17215		-0.000296655	0.989008	0.998158
NCAM1	11	FALSE	NA		0.273197	0.010142	0.362302		0.301659	0.00882174	0.218572		-0.246057	0.0723722	0.526282
CYP2R1	11	FALSE	NA		-0.154332	0.0101503	0.362302		-0.0746838	0.232164	0.644068		0.112853	0.110075	0.573775
MTFR1	8	FALSE	NA		-0.0504811	0.0101519	0.362302		-0.0557488	0.0020779	0.122204		-0.0226072	0.305522	0.736454
DOCK8	9	FALSE	NA		-0.261153	0.0101642	0.362302		-0.0950667	0.356336	0.73325		0.173375	0.132514	0.594189
UBE2E1	3	FALSE	NA		-0.0481358	0.0101913	0.362594		-0.0269123	0.219702	0.629966		0.0134829	0.602489	0.890202
FNDC5	1	FALSE	NA		0.198408	0.010231	0.362941		0.0618	0.424095	0.777659		-0.25713	0.0060637	0.273076
RAB10	2	FALSE	NA		-0.0297171	0.0102392	0.362941		-0.031377	0.00589546	0.181497		0.00538864	0.702263	0.923541
ZBTB48	1	FALSE	NA		0.0548819	0.0102757	0.362941		-0.029792	0.126311	0.542989		-0.0717249	0.00341471	0.24156
DHX35	20	FALSE	NA		0.0493154	0.0102767	0.362941		0.00584062	0.747395	0.92578		-0.0476066	0.0404567	0.470775
CDK5R1	17	FALSE	NA		0.159963	0.010357	0.364531		0.147018	0.0132619	0.255553		-0.084495	0.24855	0.698467
PRR4	12	FALSE	NA		0.184778	0.0103941	0.364531		0.101811	0.114991	0.527405		-0.128934	0.112223	0.575657
YPEL5	2	FALSE	NA		-0.0707629	0.0104086	0.364531		-0.0313345	0.245829	0.65442		0.0361916	0.265608	0.710797
MLLT1	19	FALSE	NA		0.0501734	0.0104331	0.364531		-0.000849837	0.964018	0.991365		-0.0339086	0.148371	0.608715
SAR1A	10	FALSE	NA		-0.0377172	0.0104386	0.364531		-0.0236742	0.0875864	0.484531		0.00810721	0.633548	0.901909
AAMP	2	FALSE	NA		-0.0304203	0.0104551	0.364531		-0.012099	0.285176	0.682442		0.023908	0.0852725	0.547339
SHD	19	FALSE	NA		0.151716	0.0104557	0.364531		0.128701	0.0403959	0.369243		-0.14231	0.0692373	0.521926
TMIE	3	FALSE	NA		-0.178518	0.0104738	0.364531		-0.0363625	0.554416	0.849408		0.0965995	0.246284	0.696804
L1CAM	X	FALSE	Variable		0.284763	0.0105198	0.365002		0.131669	0.221861	0.632659		-0.295053	0.023707	0.402958
PRM3	16	FALSE	NA		-0.0520519	0.0105398	0.365002		-0.00535048	0.782684	0.938042		0.0414233	0.0930144	0.551429
SKP1	5	FALSE	NA		-0.0345542	0.0106001	0.365002		-0.00236944	0.854629	0.961931		0.0482531	0.00250105	0.211489
ABCB6	2	FALSE	NA		0.11377	0.0106001	0.365002		0.0644839	0.129132	0.546928		-0.0646483	0.251438	0.70001
NDUFB3	2	FALSE	NA		-0.0395837	0.0106092	0.365002		-0.032409	0.0284319	0.328633		0.0317199	0.078563	0.538072
TAAR1	6	FALSE	NA		-0.0583228	0.0106266	0.365002		-0.0664547	0.0165262	0.269043		0.0673562	0.0452556	0.481863
SETD9	5	FALSE	NA		-0.103222	0.0106384	0.365002		0.0121872	0.779198	0.936635		0.0850819	0.0944837	0.554102
C2CD3	11	FALSE	NA		0.0561876	0.0106464	0.365002		0.00742195	0.726091	0.918546		-0.0592051	0.0281638	0.421622
NDUFB4	3	FALSE	NA		-0.0410341	0.0106587	0.365002		-0.0195933	0.192927	0.607423		0.0387865	0.0353304	0.450654
AARSD1	17	FALSE	NA		0.0379185	0.0107013	0.365057		-0.00268071	0.842921	0.959045		-0.0167998	0.319524	0.746623
STMN3	20	FALSE	NA		0.23382	0.0107082	0.365057		0.150006	0.0575474	0.420479		-0.128521	0.226748	0.67943
ARPC5	1	FALSE	NA		-0.0346907	0.0107174	0.365057		0.00745059	0.570343	0.856095		0.0487784	0.0024643	0.211489
HS3ST2	16	FALSE	NA		-0.123545	0.0108821	0.3677		-0.0410934	0.362966	0.737352		0.100872	0.0922845	0.55113
FAM204A	10	FALSE	NA		-0.0409544	0.0108904	0.3677		-0.0449652	0.00290604	0.139508		0.00118363	0.948426	0.990607
SLC38A2	12	FALSE	NA		-0.05173	0.0108923	0.3677		-0.0385794	0.0380501	0.360989		-0.00974709	0.666129	0.912209
MKX	10	FALSE	NA		-0.208675	0.010908	0.3677		-0.143117	0.0731911	0.456896		0.0115891	0.915629	0.982183
CASD1	7	FALSE	NA		0.0847276	0.0109472	0.3677		0.0783952	0.0110608	0.236734		-0.0265801	0.488422	0.840268
GATA6	18	FALSE	NA		-0.200437	0.0109741	0.3677		-0.0288113	0.728236	0.919569		0.224247	0.0259336	0.411588
PSTK	10	FALSE	NA		-0.094018	0.0110421	0.3677		-0.100517	0.00590384	0.181497		0.0200726	0.641649	0.904432
CHMP5	9	FALSE	NA		-0.0379334	0.0110568	0.3677		-0.0228672	0.109932	0.52028		-0.00114855	0.947233	0.990607
ARHGEF5	7	FALSE	NA		-0.215982	0.011098	0.3677		-0.141151	0.089057	0.486982		0.212651	0.0459676	0.482721
C16orf89	16	FALSE	NA		0.126571	0.0111011	0.3677		-0.0429355	0.431129	0.781352		-0.0879868	0.162963	0.624195
GLRX3	10	FALSE	NA		-0.0416203	0.0111057	0.3677		-0.0372326	0.0159014	0.268049		0.0183106	0.334982	0.757653
ACTG1	17	FALSE	NA		-0.0362875	0.0111122	0.3677		-0.00418064	0.753768	0.928887		0.0496173	0.00251018	0.211489
AJUBA	14	FALSE	NA		-0.130854	0.0111353	0.3677		-0.0487804	0.260222	0.666069		-0.00217328	0.967561	0.993043
PALLD	4	FALSE	NA		-0.126303	0.0111379	0.3677		-0.0497222	0.309449	0.701567		0.0678493	0.250564	0.700006
CASP6	4	FALSE	NA		-0.0684937	0.01115	0.3677		0.040498	0.139481	0.559013		0.10924	0.000746589	0.127828
ADCYAP1R1	7	FALSE	NA		0.127494	0.0111763	0.3677		0.054677	0.238992	0.648621		-0.00112446	0.982643	0.996226
CCL21	9	FALSE	NA		-0.0588252	0.011197	0.3677		-0.0160223	0.483517	0.811766		0.0350038	0.231503	0.68448
ZNF496	1	FALSE	NA		0.0654119	0.0112007	0.3677		-0.00535621	0.813033	0.948289		-0.0780917	0.0060619	0.273076
GPANK1	6	FALSE	NA		0.0493682	0.0112055	0.3677		-0.0222281	0.211618	0.623661		-0.0523335	0.0165566	0.360392
PPP2R5C	14	FALSE	NA		-0.043088	0.0112134	0.3677		-0.0259601	0.104544	0.511499		0.0306774	0.112843	0.575742
KRT3	12	FALSE	NA		-0.0913564	0.0112165	0.3677		-0.0975363	0.00731231	0.200494		0.0244748	0.578809	0.881229
NECTIN1	11	FALSE	NA		0.134305	0.0112286	0.3677		0.0655377	0.188987	0.604537		-0.0949078	0.136505	0.596881
CBX8	17	FALSE	NA		0.0844623	0.0112768	0.3677		0.0117195	0.674981	0.899947		-0.00734108	0.84031	0.961034
ZNF333	19	FALSE	NA		0.0798676	0.0112813	0.3677		0.0779801	0.0190475	0.283479		-0.0355453	0.36842	0.778895
RPS6KA5	14	FALSE	NA		0.147018	0.0112823	0.3677		0.0353716	0.490126	0.814857		-0.119797	0.0613827	0.507444
PEX16	11	FALSE	NA		0.0475621	0.0113282	0.3677		-0.0187116	0.27725	0.676337		-0.0630399	0.00357248	0.24156
CYP4A22	1	FALSE	NA		-0.03942	0.0113299	0.3677		-0.019021	0.14939	0.572169		0.0324169	0.0478512	0.483971
CYP2B6	19	FALSE	NA		-0.137594	0.0113318	0.3677		-0.0036241	0.94325	0.984791		0.128577	0.0484604	0.483971
ZNF346	5	FALSE	NA		0.0480683	0.011428	0.369655		0.0611601	0.00538404	0.175595		-0.00751574	0.778619	0.943591
SMAD3	15	FALSE	NA		-0.130678	0.0114412	0.369655		-0.101785	0.020784	0.292367		-0.00139356	0.978956	0.994701
CD164	6	FALSE	NA		-0.0421542	0.0114499	0.369655		-0.012958	0.402048	0.765415		0.0301653	0.109604	0.57354
EMSY	11	FALSE	NA		0.0571273	0.0114995	0.370082		0.00987229	0.642547	0.885974		-0.0646711	0.0139971	0.346132
ARHGAP9	12	FALSE	NA		0.181904	0.0115065	0.370082		0.159501	0.0292671	0.332393		-0.0714146	0.387887	0.791692
FAM131A	3	FALSE	NA		0.13379	0.0115412	0.370082		-0.0381478	0.384923	0.754625		-0.141177	0.017765	0.367508
YIPF5	5	FALSE	NA		-0.0480129	0.0115531	0.370082		-0.02191	0.185298	0.600513		0.0190234	0.34583	0.767057
ZNF518B	4	FALSE	NA		-0.263487	0.0115596	0.370082		-0.0865308	0.436639	0.784835		0.252924	0.0576526	0.500862
HSPE1.MOB4	2	FALSE	NA		0.144389	0.0116125	0.370837		0.0177791	0.725165	0.918451		-0.0547657	0.435152	0.816768
UNC80	2	FALSE	NA		0.120361	0.0116219	0.370837		0.0534386	0.249703	0.657497		-0.0507085	0.340863	0.762696
CDCP1	3	FALSE	NA		-0.205257	0.0116418	0.370856		-0.18198	0.0224005	0.300219		0.0240847	0.787493	0.945942
UBN2	7	FALSE	NA		0.0868766	0.011668	0.371075		0.0578197	0.0793956	0.468597		-0.0628184	0.125715	0.586351
FAM114A1	4	FALSE	NA		-0.121167	0.0117117	0.371458		-0.0461801	0.319412	0.709432		0.0299558	0.57386	0.879186
RAB13	1	FALSE	NA		-0.102277	0.0117188	0.371458		-0.0883111	0.0124283	0.247238		0.0343929	0.413209	0.806696
PTMA	2	FALSE	NA		-0.0333732	0.0117507	0.371855		-0.0216809	0.0847258	0.480564		0.0312465	0.0408881	0.471703
NKAIN1	1	FALSE	NA		0.154512	0.0117817	0.372221		0.0965258	0.145586	0.567114		-0.0288461	0.699992	0.923038
B4GALNT2	17	FALSE	NA		-0.138621	0.0118383	0.373393		-0.062508	0.233165	0.644665		0.0698001	0.298084	0.732208
IFNA8	9	FALSE	NA		-0.0400455	0.011937	0.375371		-0.0145483	0.418437	0.77605		0.00998567	0.661564	0.910428
ASIC2	17	FALSE	NA		-0.102923	0.0119402	0.375371		-0.0922423	0.0459394	0.387001		-0.021545	0.717976	0.927119
PSMD1	2	FALSE	NA		-0.031925	0.0119862	0.376203		-0.013421	0.269296	0.671478		0.0240867	0.107247	0.57175
C2CD5	12	FALSE	NA		0.0502141	0.0120147	0.376454		-0.0135652	0.505301	0.821859		-0.0286675	0.261341	0.707073
FAM72C	1	FALSE	NA		0.145694	0.0120392	0.376454		0.0426606	0.456552	0.797023		-0.126108	0.0756587	0.532865
ARL13A	X	FALSE	Inactive		-0.0642184	0.0120602	0.376454		-0.00614978	0.788014	0.93914		0.0342835	0.242208	0.693878
ZNF500	16	FALSE	NA		0.0757752	0.0120728	0.376454		0.0978254	0.000624373	0.0663028		-0.0118431	0.739427	0.932686
DOT1L	19	FALSE	NA		0.0788036	0.0121589	0.377873		0.031903	0.281946	0.680743		-0.0613841	0.0946243	0.554215
ATP1A3	19	FALSE	NA		0.278863	0.0121828	0.377873		0.22282	0.0353542	0.351342		-0.00754458	0.955676	0.990734
USP32	17	FALSE	NA		0.0474744	0.0121936	0.377873		0.0128642	0.439535	0.786825		-0.0567438	0.00568091	0.266467
TSC2	16	FALSE	NA		0.0388292	0.0121971	0.377873		0.0363966	0.0129034	0.252241		-0.0232467	0.200416	0.657663
EIF2S3B	12	FALSE	NA		-0.156682	0.0122236	0.378078		-0.0614824	0.305489	0.698886		0.0535901	0.457731	0.826265
DHX32	10	FALSE	NA		-0.111201	0.0122572	0.378078		-0.0783552	0.0601444	0.428847		0.0523996	0.28733	0.725917
ZNF76	6	FALSE	NA		0.0512008	0.0122629	0.378078		0.0399024	0.0499944	0.400812		-0.0585329	0.0172806	0.364029
MAGED4B	X	FALSE	NA		0.202119	0.0123564	0.379206		0.128176	0.175098	0.592528		0.112534	0.329016	0.753019
MOB4	2	FALSE	NA		-0.0370236	0.0123857	0.379206		-0.00207765	0.885574	0.969897		0.0463208	0.00951075	0.314461
PDLIM4	5	FALSE	NA		-0.274552	0.0124496	0.379206		-0.036972	0.764502	0.932184		0.205085	0.170583	0.630348
COG3	13	FALSE	NA		0.0502696	0.0124828	0.379206		0.0407186	0.0381384	0.360989		-0.00560718	0.819673	0.953835
DENND10	10	FALSE	NA		-0.0520326	0.012485	0.379206		-0.030027	0.124957	0.540766		0.0198741	0.405654	0.802506
GGA3	17	FALSE	NA		0.0416056	0.0125048	0.379206		0.00397807	0.794113	0.942078		-0.0233943	0.215843	0.670417
PLEKHA1	10	FALSE	NA		-0.0831068	0.0125161	0.379206		-0.0404829	0.163088	0.582905		0.0295659	0.398451	0.797474
COPZ1	12	FALSE	NA		-0.032958	0.0125203	0.379206		-0.0467344	0.000159705	0.0318479		0.0123209	0.419039	0.809821
VSIG10	12	FALSE	NA		-0.0703752	0.0125282	0.379206		-0.0476027	0.0660445	0.441165		0.0261034	0.412044	0.805592
REST	4	FALSE	NA		-0.0957191	0.0125584	0.379206		-0.0760277	0.0366476	0.356516		0.00423256	0.917962	0.982636
CCDC180	9	FALSE	NA		0.22666	0.0125608	0.379206		-0.0395091	0.656767	0.892364		-0.312582	0.00418608	0.25315
COL2A1	12	FALSE	NA		0.196972	0.0125718	0.379206		0.120928	0.110923	0.521026		-0.0558872	0.512525	0.851781
PAOX	10	FALSE	NA		-0.184059	0.0125962	0.379206		-0.0485336	0.496199	0.817533		0.110983	0.197121	0.654611
COL1A1	17	FALSE	NA		-0.253002	0.012621	0.379206		-0.0230706	0.821574	0.951925		0.17632	0.139385	0.600804
DENND1B	1	FALSE	NA		-0.139673	0.012659	0.379206		0.0281787	0.590939	0.865349		0.148148	0.0168348	0.361523
RPF1	1	FALSE	NA		-0.0419921	0.0126636	0.379206		-0.0339664	0.0378164	0.360619		0.00723787	0.713257	0.925678
SYNGAP1	6	FALSE	NA		0.108252	0.0126894	0.379206		-0.0227174	0.590594	0.865161		-0.0936576	0.0686336	0.520756
TNKS	8	FALSE	NA		0.0708336	0.0126958	0.379206		0.0125726	0.630228	0.881888		-0.0598845	0.0599096	0.503019
SHOC2	10	FALSE	NA		-0.0529954	0.0127031	0.379206		-0.0236225	0.248041	0.656365		0.0405722	0.0981682	0.558901
PINK1	1	FALSE	NA		-0.090907	0.0127133	0.379206		-0.0186083	0.586365	0.862781		0.0415712	0.296363	0.731391
CAPN2	1	FALSE	NA		-0.0886549	0.0127147	0.379206		-0.0392149	0.223559	0.633824		0.0421296	0.281374	0.722138
SUPT7L	2	FALSE	NA		0.0312243	0.0127533	0.379409		-0.000179783	0.988194	0.996807		-0.0429135	0.00442979	0.254288
PRUNE2	9	FALSE	NA		0.267916	0.0127611	0.379409		0.359256	0.000646992	0.0669116		0.162371	0.20139	0.658043
ERICH2	2	FALSE	NA		-0.236908	0.012905	0.383095		-0.0156732	0.851357	0.960792		0.367431	0.000368755	0.0883874
KRTCAP3	2	FALSE	NA		0.222623	0.0129696	0.383473		0.0641338	0.443046	0.787966		-0.0209841	0.854151	0.964972
MMADHC	2	FALSE	NA		-0.0336771	0.0129711	0.383473		-0.0343977	0.00733239	0.200494		0.0106803	0.497765	0.843396
PPA2	4	FALSE	NA		-0.0418005	0.0129777	0.383473		-0.0148321	0.348424	0.72809		0.0434507	0.0245857	0.405748
REEP3	10	FALSE	NA		-0.0642104	0.0130161	0.383873		-0.0261068	0.323159	0.712405		0.0380654	0.249776	0.699162
PTPRC	1	FALSE	NA		0.181992	0.0130313	0.383873		0.174384	0.0201694	0.289939		0.0287506	0.739825	0.932686
CEP152	15	FALSE	NA		0.0802162	0.013082	0.384502		-0.0304305	0.308086	0.701211		-0.0991844	0.00809294	0.303991
NTN3	16	FALSE	NA		0.112261	0.0130927	0.384502		0.0412258	0.331546	0.71599		-0.110243	0.0290156	0.427367
PRB4	12	FALSE	NA		-0.0339645	0.0131452	0.38461		-0.031172	0.0196156	0.286832		0.0344727	0.0359421	0.451445
ZNF721	4	FALSE	NA		-0.0896212	0.0131659	0.38461		-0.0105198	0.758478	0.930221		0.0494207	0.221162	0.674925
TXNDC17	17	FALSE	NA		-0.0452132	0.0131784	0.38461		-0.0484974	0.00530345	0.17475		0.0526647	0.0156395	0.355854
HDAC11	3	FALSE	NA		-0.111381	0.0132306	0.38461		0.0438612	0.310904	0.70276		0.151955	0.00420247	0.25315
RAPGEF6	5	FALSE	NA		0.0597438	0.0132475	0.38461		0.0531301	0.039245	0.363927		-0.0139375	0.660965	0.910324
CAPNS1	19	FALSE	NA		-0.0337952	0.0132549	0.38461		-0.0221674	0.0761424	0.462965		0.0219039	0.155143	0.61461
KIAA0825	5	FALSE	NA		-0.124845	0.0132675	0.38461		0.0284373	0.540077	0.842474		0.100083	0.0984947	0.559496
PLCD1	3	FALSE	NA		-0.148797	0.0132703	0.38461		-0.104651	0.0701128	0.449533		0.141112	0.0452496	0.481863
CPLX1	4	FALSE	NA		0.220347	0.0132769	0.38461		0.00602441	0.945933	0.985809		-0.00130462	0.989767	0.998176
C2CD2L	11	FALSE	NA		0.0773537	0.0133047	0.384832		0.0409544	0.177399	0.594857		-0.0470197	0.203542	0.660216
TMTC2	12	FALSE	NA		0.210453	0.0133331	0.385073		0.130361	0.0795026	0.468597		-0.116835	0.215116	0.670377
PIP5K1B	9	FALSE	NA		-0.216558	0.013406	0.386597		-0.0728924	0.362416	0.736908		0.242462	0.0156013	0.355854
COX16	14	FALSE	NA		-0.0444001	0.0134541	0.387311		-0.0465121	0.00442666	0.162401		0.0346708	0.0870587	0.548339
ATXN2	12	FALSE	NA		0.0330231	0.0134712	0.387311		0.0145761	0.260757	0.666362		-0.0232817	0.151974	0.611829
CLIC1	6	FALSE	NA		-0.0389869	0.0135783	0.389442		-0.0384298	0.0274192	0.32358		0.0441013	0.0413724	0.472461
IGFBP6	12	FALSE	NA		-0.199485	0.0136244	0.389442		-0.137292	0.0600318	0.428764		-0.0149982	0.868957	0.969118
GSTP1	11	FALSE	NA		-0.107483	0.013673	0.389442		-0.0317951	0.497932	0.818512		0.10565	0.0616497	0.507907
MRPS22	3	FALSE	NA		-0.0378639	0.013675	0.389442		-0.0508437	0.00099197	0.0834342		-0.0125228	0.502881	0.846011
MAP3K12	12	FALSE	NA		0.105614	0.0136853	0.389442		-0.0370621	0.362194	0.736798		-0.119915	0.0165477	0.360392
IL20RA	6	FALSE	NA		-0.179943	0.0137001	0.389442		0.0291018	0.694714	0.907304		0.179288	0.0522689	0.496349
CPXM2	10	FALSE	NA		-0.135394	0.0137265	0.389442		-0.0366558	0.452914	0.794704		0.0990747	0.129036	0.591019
SOCS7	17	FALSE	NA		0.0778101	0.0137333	0.389442		0.0458274	0.106543	0.515171		-0.0600562	0.092289	0.55113
LGR6	1	FALSE	NA		-0.203052	0.0137495	0.389442		-0.109061	0.171777	0.589383		-0.0245174	0.815733	0.952815
PTP4A2	1	FALSE	NA		-0.0393963	0.0137608	0.389442		-0.0176375	0.254912	0.662261		0.0174676	0.350797	0.769982
PCDHA5	5	FALSE	NA		0.0984503	0.0138334	0.389442		0.00732313	0.869071	0.965634		-0.0909425	0.0815578	0.543767
CD160	1	FALSE	NA		0.117394	0.0138588	0.389442		0.116764	0.0102381	0.232913		-0.0425465	0.43244	0.81623
C19orf12	19	FALSE	NA		0.0570898	0.0138796	0.389442		0.0512932	0.0257555	0.315106		-0.0480121	0.0818793	0.543922
CHRNB4	15	FALSE	NA		0.12434	0.0139241	0.389442		-0.0238815	0.677424	0.900714		-0.0680099	0.275901	0.718791
APC2	19	FALSE	NA		0.151053	0.0139439	0.389442		0.00653751	0.91488	0.978456		-0.011634	0.867996	0.969055
ADTRP	6	FALSE	NA		-0.254631	0.0139741	0.389442		-0.130997	0.179973	0.595749		0.0761015	0.535746	0.864087
NRN1	6	FALSE	NA		0.257116	0.0139757	0.389442		0.20177	0.0737198	0.458257		-0.110167	0.381454	0.787312
TSC1	9	FALSE	NA		0.0430644	0.0139846	0.389442		0.0124753	0.436238	0.784372		-0.0618182	0.00193903	0.195709
ZNF19	16	FALSE	NA		-0.113057	0.0140116	0.389442		-0.0211488	0.62	0.878315		0.0715538	0.171453	0.630713
CWC25	17	FALSE	NA		0.0445707	0.0140267	0.389442		0.0188593	0.252867	0.660388		-0.0222444	0.281364	0.722138
CCDC136	7	FALSE	NA		0.193143	0.0140267	0.389442		0.247298	0.00240459	0.128091		-0.0516936	0.596155	0.887479
CREBBP	16	FALSE	NA		0.0565117	0.0140509	0.389442		0.0355627	0.101848	0.50644		-0.0419624	0.121388	0.57928
ARHGEF6	X	FALSE	Inactive		0.193681	0.014056	0.389442		0.133995	0.107089	0.516726		-0.000396241	0.996572	0.999055
NGEF	2	FALSE	NA		-0.209	0.0140598	0.389442		-0.0841426	0.333555	0.717312		0.0590577	0.56355	0.875016
CAMSAP1	9	FALSE	NA		0.0532274	0.0140722	0.389442		0.0345284	0.0973505	0.498968		-0.0295714	0.25295	0.701293
MORN2	2	FALSE	NA		-0.0597463	0.0140769	0.389442		-0.0561218	0.0170752	0.270677		0.026416	0.351229	0.769982
CTNNA1	5	FALSE	NA		-0.0621191	0.0141145	0.389442		-0.0533069	0.0100939	0.232156		0.0379065	0.132333	0.594041
KIFBP	10	FALSE	NA		-0.0524246	0.014132	0.389442		-0.0259889	0.18228	0.597481		0.0302682	0.197171	0.654611
NUMBL	19	FALSE	NA		0.0900332	0.0141342	0.389442		-0.0230113	0.487895	0.813994		-0.0997163	0.022982	0.398428
GADD45B	19	FALSE	NA		-0.146927	0.0141683	0.38958		-0.0810132	0.13298	0.552238		0.00732161	0.906445	0.979207
PSMA3	14	FALSE	NA		-0.0362269	0.0142498	0.38958		-0.0320748	0.0217489	0.297914		0.0256209	0.136927	0.596982
TRUB1	10	FALSE	NA		-0.0489528	0.0142602	0.38958		-0.0414151	0.022926	0.301544		0.0260861	0.240538	0.692575
ORC2	2	FALSE	NA		-0.0428238	0.0143007	0.38958		0.00137406	0.935707	0.982634		0.0569743	0.00598178	0.272476
CMTM6	3	FALSE	NA		-0.0536355	0.0143144	0.38958		-0.027463	0.192931	0.607423		0.00953779	0.703716	0.923541
DCAF4L1	4	FALSE	NA		0.107981	0.0143311	0.38958		0.0741782	0.0782107	0.467488		-0.0250558	0.618169	0.895002
ACTB	7	FALSE	NA		-0.0311814	0.0143356	0.38958		-0.0161317	0.180079	0.595749		0.0369448	0.0131112	0.337118
SCPEP1	17	FALSE	NA		-0.0829039	0.0143412	0.38958		-0.0579298	0.0837997	0.478678		0.0249535	0.538319	0.865398
ZBTB12	6	FALSE	NA		0.0893736	0.0143542	0.38958		0.00524573	0.874501	0.967257		-0.109828	0.0062127	0.273585
DHPS	19	FALSE	NA		0.0327447	0.0143601	0.38958		0.0036135	0.768785	0.934028		-0.0152925	0.313642	0.743016
RANBP3L	5	FALSE	NA		-0.114403	0.0143627	0.38958		-0.0363724	0.35942	0.734817		0.077332	0.144496	0.606612
LIPH	3	FALSE	NA		-0.216671	0.0144139	0.390138		-0.0679824	0.472776	0.806795		0.0951354	0.390409	0.793347
GRIN2C	17	FALSE	NA		0.130336	0.0144546	0.390138		0.134551	0.00518983	0.173087		0.0289628	0.60676	0.890872
PHOSPHO1	17	FALSE	NA		-0.190457	0.0144674	0.390138		-0.182177	0.0126638	0.249592		0.141705	0.118822	0.578013
MEN1	11	FALSE	NA		0.0404758	0.0144734	0.390138		0.00196019	0.897501	0.973329		-0.0445336	0.0184537	0.374352
STX8	17	FALSE	NA		-0.069247	0.0145322	0.390138		-0.0545775	0.0416211	0.373252		0.0270789	0.403421	0.800372
OPN1MW2	X	FALSE	NA		-0.0585382	0.0145534	0.390138		-0.0167067	0.367055	0.741184		0.058368	0.0128248	0.33675
MIER2	19	FALSE	NA		0.0873103	0.0145675	0.390138		0.0153801	0.651116	0.889933		0.00114457	0.980366	0.994997
ANPEP	15	FALSE	NA		-0.329862	0.014584	0.390138		-0.239315	0.0823617	0.47488		-0.281911	0.0835441	0.544943
PCDHGA5	5	FALSE	NA		0.133313	0.0146281	0.390138		0.0972299	0.0615813	0.431073		-0.0504813	0.417057	0.809326
AKTIP	16	FALSE	NA		-0.0651567	0.0146341	0.390138		-0.021484	0.389745	0.756708		0.0577247	0.0617511	0.507907
SNCA	4	FALSE	NA		0.266207	0.0146386	0.390138		-0.0354641	0.744816	0.925002		-0.197963	0.117553	0.577354
SRPX2	X	FALSE	Variable		-0.199113	0.014655	0.390138		0.0884703	0.32226	0.711721		0.0126916	0.902779	0.977792
DENND4B	1	FALSE	NA		0.0469137	0.0146827	0.390138		0.00388296	0.82874	0.954041		-0.0477963	0.0308482	0.430534
PRCP	11	FALSE	NA		-0.0748313	0.0146868	0.390138		-0.0761971	0.00440559	0.162401		0.0189178	0.556332	0.872624
CRP	1	FALSE	NA		-0.0682846	0.0146884	0.390138		-0.016446	0.506242	0.822436		0.0747326	0.0173359	0.36413
GHITM	10	FALSE	NA		-0.0353076	0.0147596	0.391486		-0.0275552	0.0443797	0.381467		0.0147867	0.375657	0.783708
SIK3	11	FALSE	NA		0.0600648	0.0148017	0.392008		-0.00610598	0.794323	0.942153		-0.022907	0.435149	0.816768
LINGO1	15	FALSE	NA		0.230738	0.0148476	0.392008		0.179937	0.0556392	0.414688		0.0379495	0.704304	0.923541
SERTM2	X	FALSE	NA		0.101215	0.0148523	0.392008		0.0610037	0.0902781	0.488948		0.00762512	0.856795	0.965898
TECPR1	7	FALSE	NA		0.08706	0.0148684	0.392008		0.0157063	0.625185	0.87995		-0.10919	0.0061203	0.273561
C1QL1	17	FALSE	NA		0.211207	0.0148815	0.392008		0.146951	0.0626101	0.431962		0.0106049	0.919224	0.982936
ATP5ME	4	FALSE	NA		-0.0409607	0.0149276	0.392415		-0.00389961	0.804758	0.945988		0.0586906	0.00251444	0.211489
TMSB4X	X	FALSE	NA		-0.0734337	0.0149525	0.392415		-0.0222721	0.415207	0.773994		0.0476165	0.14522	0.607005
ABHD4	14	FALSE	NA		-0.112988	0.0149583	0.392415		-0.111127	0.00721832	0.200494		0.0198574	0.689844	0.919745
USP11	X	FALSE	Inactive		0.0533913	0.0149978	0.392914		-0.000703312	0.972545	0.99358		-0.0339671	0.181356	0.641739
KCNIP2	10	FALSE	NA		0.155055	0.0151086	0.395277		0.12222	0.0372864	0.358058		-0.113381	0.118429	0.577667
EPHB6	7	FALSE	NA		-0.277462	0.0151504	0.395341		0.0652122	0.571342	0.856655		0.321566	0.020474	0.386429
SMARCA4	19	FALSE	NA		0.0577064	0.0151523	0.395341		0.0265541	0.240697	0.650211		-0.0261809	0.351008	0.769982
CNTRL	9	FALSE	NA		0.0665314	0.015209	0.395876		0.00855177	0.748561	0.926102		-0.0940399	0.00355385	0.24156
XG	X	TRUE	Escape		-0.177511	0.0152141	0.395876		-0.109001	0.120376	0.534946		0.103213	0.256536	0.704118
AGAP3	7	FALSE	NA		0.0807173	0.015268	0.396417		0.0289612	0.275015	0.674884		-0.0624575	0.0691899	0.521926
GMFB	14	FALSE	NA		-0.0402126	0.0152762	0.396417		-0.0269288	0.101604	0.5062		0.0214043	0.287219	0.725917
PAQR6	1	FALSE	NA		0.171844	0.015321	0.397041		0.0381531	0.563782	0.853589		-0.144271	0.0838664	0.545402
DMP1	4	FALSE	NA		-0.0637716	0.0153842	0.39789		-0.0383108	0.069655	0.448071		0.0601101	0.0227537	0.398428
CBL	11	FALSE	NA		0.0684222	0.0153952	0.39789		-0.00684612	0.785144	0.938534		-0.0678133	0.0298682	0.429012
YJEFN3	19	FALSE	NA		0.149025	0.0154287	0.398218		0.100006	0.0870428	0.484531		-0.0622399	0.399845	0.79865
MOB1A	2	FALSE	NA		-0.0335152	0.0154893	0.398751		-0.0112194	0.384947	0.754625		0.0206481	0.186384	0.645644
APBA2	15	FALSE	NA		0.251221	0.0154909	0.398751		0.311887	0.00408896	0.157914		0.106938	0.427117	0.813308
LGALS3	14	FALSE	NA		-0.151688	0.0155437	0.399572		-0.154446	0.0106031	0.235514		0.0218821	0.748418	0.933542
LTBP2	14	FALSE	NA		-0.207343	0.0156178	0.40094		-0.154354	0.0727847	0.455695		-0.117352	0.22482	0.677357
UPP1	7	FALSE	NA		-0.129222	0.0156695	0.401357		-0.0443022	0.404984	0.767885		0.00185105	0.977215	0.993908
LRSAM1	9	FALSE	NA		0.0543865	0.015715	0.401357		-0.00687699	0.737393	0.922464		-0.0351171	0.188516	0.646573
HPCA	1	FALSE	NA		0.174735	0.0157239	0.401357		0.107177	0.132532	0.551738		-0.0759403	0.352624	0.770256
MAGEB10	X	FALSE	NA		-0.0457175	0.0157378	0.401357		-0.0729936	0.00161886	0.110484		0.0416917	0.139809	0.600804
SHH	7	FALSE	NA		-0.151492	0.0157387	0.401357		-0.103148	0.12749	0.544999		0.0697658	0.391588	0.79373
HAND2	4	FALSE	NA		0.129299	0.0157752	0.401393		-0.0311119	0.588278	0.863616		-0.110009	0.107973	0.571931
LRRFIP2	3	FALSE	NA		-0.0509967	0.0157935	0.401393		-0.0119702	0.597411	0.868983		0.0153715	0.57181	0.878473
CDC42	1	FALSE	NA		-0.0333996	0.0158029	0.401393		-0.0307439	0.0143613	0.26211		0.0295898	0.0555398	0.498539
RAB7B	1	FALSE	NA		-0.2174	0.0158263	0.401457		-0.0265655	0.752488	0.928277		0.142441	0.176535	0.636693
PVRIG	7	FALSE	NA		0.211102	0.0158657	0.401558		0.168802	0.0363598	0.355388		-0.170374	0.0836866	0.544943
FKBP11	12	FALSE	NA		0.106071	0.0158722	0.401558		-0.0339562	0.380607	0.750685		-0.109927	0.0295217	0.429012
YES1	18	FALSE	NA		-0.0789477	0.0159527	0.403064		-0.0221134	0.466917	0.803378		0.025715	0.476624	0.835409
PAFAH2	1	FALSE	NA		-0.0634716	0.0160037	0.40382		-0.0637527	0.0108918	0.235748		0.0234744	0.437894	0.81744
IDE	10	FALSE	NA		-0.0541443	0.0160961	0.40552		-0.00376123	0.855831	0.962388		0.0419517	0.0921372	0.55113
ANG	14	FALSE	NA		-0.180694	0.0161254	0.40552		-0.0737927	0.324974	0.713545		0.273706	0.00400896	0.25315
COG1	17	FALSE	NA		0.0423396	0.0161345	0.40552		0.0282085	0.0803916	0.469878		-0.00468397	0.8207	0.953968
ADD2	2	FALSE	NA		0.296642	0.016186	0.405838		0.183675	0.148868	0.572052		-0.0216374	0.889908	0.973065
SNX7	1	FALSE	NA		-0.121436	0.0161895	0.405838		-0.0102988	0.823788	0.952924		0.0194425	0.722009	0.929303
ANKRD24	19	FALSE	NA		0.154119	0.0162307	0.40591		0.16544	0.00541479	0.175701		-0.0406443	0.571511	0.878473
SRRM4	12	FALSE	NA		0.106331	0.0162347	0.40591		0.0728574	0.0805748	0.470519		-0.00201099	0.965632	0.992941
SEC14L2	22	FALSE	NA		-0.101424	0.01626	0.406014		-0.0180938	0.655892	0.89201		0.0836554	0.0887349	0.549644
MAU2	19	FALSE	NA		0.041441	0.0162911	0.406261		0.0302339	0.0797011	0.468597		-0.0314958	0.133126	0.59454
TET3	2	FALSE	NA		0.078056	0.0163658	0.407497		-0.0235754	0.427632	0.779757		-0.0706398	0.0627035	0.509821
AXDND1	1	FALSE	NA		-0.126349	0.0163832	0.407497		-0.0828347	0.0969837	0.498289		0.0613298	0.340484	0.76252
RHOD	11	FALSE	NA		-0.223191	0.0164384	0.407569		-0.0962066	0.284385	0.682414		-0.028003	0.78747	0.945942
IGFBP3	7	FALSE	NA		-0.229695	0.0164438	0.407569		-0.0978512	0.263811	0.667858		0.24699	0.0373515	0.45654
ADAM11	17	FALSE	NA		0.189903	0.0164506	0.407569		0.105353	0.16112	0.580679		-0.138236	0.132419	0.594152
MAT2B	5	FALSE	NA		-0.0420853	0.0164711	0.407569		-0.0277204	0.0906508	0.489349		0.0297241	0.135386	0.59505
OLFML2A	9	FALSE	NA		-0.199219	0.016529	0.408476		-0.0593695	0.484274	0.812006		-0.0815619	0.433662	0.816321
TRIM49B	11	FALSE	NA		-0.0592956	0.016574	0.409059		-0.0218636	0.316414	0.707071		0.0602705	0.0279845	0.419593
SLC20A1	2	FALSE	NA		-0.0515438	0.0166	0.409062		-0.0194778	0.378004	0.748939		0.0165136	0.530675	0.861776
COX4I1	16	FALSE	NA		-0.0364109	0.0166453	0.409062		-0.0230304	0.098712	0.501532		0.0422683	0.0140826	0.347124
SH3BGRL3	1	FALSE	NA		-0.0629531	0.0166621	0.409062		-0.0168952	0.518436	0.828978		0.065469	0.0378172	0.457553
SARDH	9	FALSE	NA		0.225795	0.0166869	0.409062		0.228674	0.0121879	0.244485		-0.158972	0.158517	0.617863
AKAP17A	X	TRUE	Escape		0.0479955	0.0166976	0.409062		0.270042	1.85e-26	2.95e-23		0.21483	1.34e-12	2.58e-09
USP36	17	FALSE	NA		0.038808	0.0167151	0.409062		0.0374615	0.0180414	0.276345		-0.00275411	0.888091	0.972552
PLAUR	19	FALSE	NA		-0.152132	0.0167344	0.409062		-0.103798	0.0695064	0.448071		-0.0262066	0.683824	0.916897
PHF21B	22	FALSE	NA		0.219538	0.0167447	0.409062		0.102088	0.227096	0.637819		0.0640761	0.488323	0.840268
STXBP3	1	FALSE	NA		-0.038313	0.0167976	0.409832		-0.0259987	0.0978556	0.500554		0.0123001	0.519525	0.855037
PRCD	17	FALSE	NA		0.178002	0.0168486	0.41012		0.217419	0.00353144	0.150494		-0.270454	0.00274765	0.21848
RNF43	17	FALSE	NA		-0.19357	0.0168589	0.41012		0.0474621	0.580353	0.859378		0.307468	0.00284133	0.221326
ANKRD10	13	FALSE	NA		0.0555361	0.016904	0.41012		0.0560023	0.00954915	0.227201		-0.0153288	0.568199	0.877273
EFNA1	1	FALSE	NA		-0.147537	0.0169081	0.41012		0.0402446	0.490463	0.81514		0.110335	0.144086	0.606612
PHOX2A	11	FALSE	NA		0.122011	0.0169394	0.41012		0.097584	0.0364825	0.355672		-0.0353007	0.527156	0.858914
PDCL3	2	FALSE	NA		-0.0373397	0.0169444	0.41012		0.000834192	0.956936	0.990082		0.0682722	0.000361276	0.0876985
ZNF469	16	FALSE	NA		-0.173919	0.0169994	0.41012		-0.026763	0.693704	0.907304		0.048962	0.597	0.887631
COL5A2	2	FALSE	NA		-0.195392	0.0170041	0.41012		-0.0449471	0.632125	0.882838		0.210763	0.0269165	0.417958
SERPINB13	18	FALSE	NA		-0.155857	0.0170685	0.41012		-0.168711	0.0105733	0.235224		0.119618	0.158263	0.617634
MAGEB17	X	FALSE	NA		-0.156072	0.0170892	0.41012		-0.0469152	0.421287	0.77661		0.0664681	0.418694	0.809755
TULP3	12	FALSE	NA		0.0495252	0.0170967	0.41012		-0.00654456	0.743894	0.92454		-0.0412431	0.102966	0.566099
PLRG1	4	FALSE	NA		-0.0314516	0.0171198	0.41012		-0.0208963	0.108606	0.518589		0.0324795	0.042778	0.47612
THBS1	15	FALSE	NA		-0.189003	0.017122	0.41012		-0.042099	0.560796	0.852156		0.0494274	0.592766	0.886078
P4HA3	11	FALSE	NA		-0.15345	0.0171281	0.41012		-0.129563	0.0474601	0.393299		0.145518	0.0654716	0.512308
CDK3	17	FALSE	NA		0.0928293	0.0171302	0.41012		0.0644243	0.079188	0.468124		-0.0366836	0.429026	0.813952
BRSK1	19	FALSE	NA		0.175657	0.0172222	0.411363		0.0398394	0.572716	0.856999		-0.114728	0.196108	0.65407
CREG1	1	FALSE	NA		-0.079452	0.017225	0.411363		0.0010625	0.976243	0.994648		0.0741918	0.0885827	0.549644
FAM200B	4	FALSE	NA		-0.0528688	0.0172845	0.411471		0.0267932	0.22079	0.631483		0.0861573	0.001196	0.155835
STAU1	20	FALSE	NA		-0.0274769	0.0173221	0.411471		-0.00902446	0.423287	0.777155		0.0282531	0.0430548	0.476725
RAET1G	6	FALSE	NA		-0.190063	0.0173526	0.411471		-0.151717	0.0425886	0.377064		0.171342	0.0696646	0.522461
PHYKPL	5	FALSE	NA		0.0707857	0.0173651	0.411471		0.032737	0.23432	0.645711		-0.0715071	0.0357694	0.451445
RBM3	X	FALSE	Variable		-0.0413067	0.0173759	0.411471		-0.00300818	0.857949	0.9632		0.0465967	0.0232205	0.400069
SMIM20	4	FALSE	NA		-0.0901832	0.0173917	0.411471		-0.0143154	0.699206	0.908981		0.0744294	0.0959464	0.555597
PEX11A	15	FALSE	NA		-0.120502	0.0174027	0.411471		-0.0503197	0.253601	0.66135		0.177999	0.0018679	0.194678
HSD17B10	X	FALSE	Inactive		-0.0361585	0.0174046	0.411471		-0.0181452	0.236387	0.647568		0.0463269	0.0140243	0.346132
KBTBD12	3	FALSE	NA		-0.113025	0.0174535	0.411471		-0.0291987	0.517243	0.828645		0.0656065	0.278227	0.719757
NDUFA12	12	FALSE	NA		-0.0397122	0.017463	0.411471		-0.0453853	0.00408766	0.157914		0.0205175	0.29043	0.727829
CBX4	17	FALSE	NA		0.0732747	0.0174656	0.411471		-0.000964639	0.971641	0.993136		-0.0509896	0.144934	0.607005
NEUROD2	17	FALSE	NA		0.103118	0.0175105	0.411474		0.0195649	0.639592	0.885252		0.00903765	0.846786	0.963307
FAM25G	10	FALSE	NA		-0.141899	0.0175623	0.411474		-0.0212557	0.711229	0.91339		0.112653	0.131194	0.59269
PSTPIP1	15	FALSE	NA		0.189349	0.0175798	0.411474		0.106992	0.146438	0.568354		-0.0639925	0.434336	0.816581
IGSF22	11	FALSE	NA		0.0875133	0.0175831	0.411474		0.04107	0.289306	0.685828		-0.133397	0.0076924	0.296219
GPX8	5	FALSE	NA		-0.131265	0.0176002	0.411474		-0.0853836	0.119835	0.533692		0.0641555	0.302873	0.734926
BUD13	11	FALSE	NA		0.0466366	0.0176073	0.411474		0.0110296	0.551054	0.848732		0.00142021	0.950975	0.990734
MDH1B	2	FALSE	NA		-0.154278	0.0176159	0.411474		-0.121285	0.0542776	0.412473		0.0997671	0.202429	0.658997
SLK	10	FALSE	NA		-0.0553251	0.0177045	0.413041		-0.0676232	0.00186218	0.11747		-0.0227405	0.384128	0.788636
RALGPS2	1	FALSE	NA		-0.162984	0.0177456	0.413496		-0.0283755	0.658472	0.893039		0.0255022	0.706633	0.923758
GGT1	22	FALSE	NA		0.219748	0.0177968	0.41376		0.122736	0.0932063	0.492557		-0.0314227	0.764912	0.938978
CASKIN1	16	FALSE	NA		0.165871	0.0178001	0.41376		0.067453	0.336296	0.719671		-0.00736938	0.925327	0.983922
CCDC77	12	FALSE	NA		0.0522509	0.0179169	0.41506		-0.0482732	0.0212379	0.295773		-0.0903312	0.000564207	0.107127
CLCN5	X	FALSE	Inactive		0.135495	0.0179333	0.41506		0.0767367	0.155432	0.577119		-0.0214301	0.753022	0.934633
PSMA7	20	FALSE	NA		-0.0252287	0.0179348	0.41506		-0.0263587	0.0175764	0.274035		0.0170273	0.220525	0.673994
HHEX	10	FALSE	NA		-0.251887	0.0179426	0.41506		-0.389631	6.26e-05	0.0193616		-0.165087	0.129309	0.591123
TSNARE1	8	FALSE	NA		0.134102	0.0179713	0.415224		0.0592238	0.26235	0.666983		-0.0446391	0.521696	0.855749
BEGAIN	14	FALSE	NA		0.234834	0.0179947	0.415265		0.23994	0.0115332	0.240681		0.0115914	0.920338	0.983274
IFNA1	9	FALSE	NA		-0.0979451	0.018045	0.415924		-0.0492561	0.202785	0.616037		0.0617764	0.218063	0.672205
ZFYVE9	1	FALSE	NA		-0.0953163	0.0180771	0.416012		-0.0523748	0.150603	0.572776		0.0354821	0.387046	0.791171
PKD1	16	FALSE	NA		0.0687544	0.0180946	0.416012		0.0747815	0.00750195	0.202912		-0.0372349	0.280117	0.721145
STYXL1	7	FALSE	NA		-0.0516277	0.0181139	0.416012		-0.0371125	0.0818363	0.473445		0.00875699	0.736097	0.932289
SPCS1	3	FALSE	NA		-0.0327401	0.0181748	0.416911		-0.0267918	0.0416924	0.37344		0.0223133	0.161466	0.622491
PSMD9	12	FALSE	NA		-0.0341056	0.0182145	0.417323		-0.0366236	0.00885949	0.218659		0.00711709	0.678376	0.915435
AGR2	7	FALSE	NA		0.285331	0.0182944	0.41827		0.208501	0.0879716	0.484572		-0.168519	0.233719	0.68597
KHDC1L	6	FALSE	NA		-0.173393	0.0183078	0.41827		-0.062839	0.3764	0.747665		0.0633337	0.498375	0.843396
TRAPPC12	2	FALSE	NA		0.0353293	0.0183497	0.41827		0.00523866	0.710394	0.91309		-0.00762987	0.667412	0.912707
AMFR	16	FALSE	NA		-0.042593	0.0183547	0.41827		-0.00096769	0.953936	0.988952		0.0335904	0.10133	0.564986
EGFR	7	FALSE	NA		-0.172407	0.0183666	0.41827		-0.136209	0.0306609	0.33866		-0.0208036	0.785965	0.945397
DENND2C	1	FALSE	NA		-0.17354	0.0183914	0.41827		-0.073338	0.308965	0.701273		0.106783	0.235455	0.687927
SLIT1	10	FALSE	NA		0.159214	0.018414	0.41827		0.119985	0.0419669	0.373804		-0.0329513	0.629782	0.900297
MTMR4	17	FALSE	NA		0.0510512	0.0184303	0.41827		0.0469748	0.0219861	0.298478		-0.0157356	0.526187	0.858199
RALA	7	FALSE	NA		-0.040264	0.018501	0.418474		-0.031358	0.0616131	0.431073		0.0314814	0.129403	0.591231
RPL26L1	5	FALSE	NA		-0.0432274	0.0185202	0.418474		-0.013209	0.471275	0.806304		0.0223246	0.317987	0.745338
GBP5	1	FALSE	NA		-0.217168	0.0185208	0.418474		0.0276643	0.731393	0.920061		0.043076	0.699147	0.922685
TPRKB	2	FALSE	NA		-0.0352035	0.0185617	0.418474		-0.0355022	0.0129825	0.253013		0.0220774	0.208193	0.664164
LUC7L	16	FALSE	NA		0.0558525	0.0186245	0.418474		0.0393429	0.0536716	0.410774		-0.00665183	0.793062	0.947592
NUMA1	11	FALSE	NA		0.0333825	0.0186682	0.418474		0.00523517	0.691868	0.906491		-0.0420624	0.0106897	0.321179
RASA4B	7	FALSE	NA		0.165344	0.0186872	0.418474		0.0409769	0.529755	0.83632		-0.151339	0.05895	0.501991
ZFP36L2	2	FALSE	NA		-0.0738605	0.0186917	0.418474		-0.0274668	0.402945	0.766327		0.0769278	0.049038	0.483971
FRMD7	X	FALSE	Variable		-0.0702704	0.0186961	0.418474		0.016675	0.491364	0.815839		0.0710635	0.0253079	0.408566
CBFA2T2	20	FALSE	NA		0.0730846	0.0187514	0.418474		0.0765245	0.00537101	0.175595		0.0119337	0.735803	0.932289
BTNL3	5	FALSE	NA		-0.056664	0.018767	0.418474		-0.0140806	0.571826	0.856966		0.0562433	0.0761049	0.533494
APOBEC3B	22	FALSE	NA		-0.232806	0.0187901	0.418474		-0.111477	0.273453	0.673935		0.0622481	0.576914	0.880285
RPTOR	17	FALSE	NA		0.0536453	0.0188092	0.418474		0.0219207	0.299533	0.694556		-0.0412674	0.120357	0.57884
HSP90B1	12	FALSE	NA		-0.031954	0.0188175	0.418474		-0.0250581	0.0470722	0.391459		0.0014711	0.924177	0.983904
PCGF6	10	FALSE	NA		-0.054294	0.0188304	0.418474		-0.0271087	0.26626	0.669491		0.0288484	0.322825	0.748437
RHOC	1	FALSE	NA		-0.0624439	0.0188462	0.418474		-0.038694	0.0888476	0.48669		0.00469214	0.863294	0.967427
LEFTY1	1	FALSE	NA		0.0865957	0.0189055	0.418474		-0.0338076	0.462993	0.80097		-0.0371692	0.481188	0.83691
COTL1	16	FALSE	NA		-0.106527	0.0189187	0.418474		-0.0203804	0.652933	0.890815		0.0796499	0.135513	0.59505
TTI1	20	FALSE	NA		0.0397242	0.0189192	0.418474		-0.0205456	0.200572	0.614201		-0.0406856	0.0449999	0.481833
TTC31	2	FALSE	NA		0.0463606	0.0189498	0.418474		-0.0107055	0.531765	0.837404		-0.0723069	0.000694864	0.124537
ARL17A	17	FALSE	NA		0.0909849	0.0189616	0.418474		0.018821	0.611466	0.873795		-0.122899	0.00697489	0.284071
DSG2	18	FALSE	NA		-0.1782	0.0189634	0.418474		-0.0899865	0.177291	0.594598		0.053069	0.481778	0.837174
RIPK2	8	FALSE	NA		-0.102663	0.0189726	0.418474		-0.0445715	0.25879	0.664633		0.0416174	0.374873	0.783385
MRPL17	11	FALSE	NA		-0.0392515	0.0189838	0.418474		-0.0144152	0.366671	0.741032		0.0377536	0.0548874	0.497262
TMUB2	17	FALSE	NA		0.0333927	0.0190137	0.418474		-0.00518065	0.704006	0.911042		-0.0483119	0.00469801	0.255721
CDK2AP2	11	FALSE	NA		-0.0512651	0.0190338	0.418474		-0.0618085	0.00152645	0.106845		0.0248176	0.30622	0.737044
RAD51B	14	FALSE	NA		-0.0649697	0.0190476	0.418474		-0.106897	2.44e-05	0.0101049		-0.00543604	0.858046	0.966165
RPP30	10	FALSE	NA		-0.0409233	0.0190503	0.418474		-0.0460648	0.00492516	0.169971		-0.00345718	0.861327	0.96702
TNRC6C	17	FALSE	NA		0.138601	0.0191026	0.418803		0.105317	0.064478	0.437233		-0.0450303	0.519231	0.854929
SAPCD1	6	FALSE	NA		0.128057	0.0191898	0.418803		0.0439438	0.38908	0.756307		-0.0310797	0.626731	0.89871
BTC	4	FALSE	NA		-0.15463	0.0192318	0.418803		-0.056925	0.434612	0.783379		0.159365	0.0696693	0.522461
RAB18	10	FALSE	NA		-0.0410114	0.0192575	0.418803		-0.025429	0.111367	0.521406		0.0264347	0.180229	0.640273
MEAK7	16	FALSE	NA		-0.0819475	0.0192673	0.418803		-0.0485431	0.134923	0.5547		-0.010156	0.797707	0.948631
GPR151	5	FALSE	NA		-0.0366645	0.0192828	0.418803		-0.0177622	0.185098	0.600513		0.0358162	0.0317118	0.431788
PSMB6	17	FALSE	NA		-0.0376536	0.0192868	0.418803		-0.0465255	0.00239793	0.128091		0.0269874	0.156316	0.616297
CAST	5	FALSE	NA		-0.0557838	0.0192934	0.418803		-0.0324364	0.1514	0.572991		0.0334189	0.234641	0.686643
VPS35	16	FALSE	NA		-0.0301725	0.0193064	0.418803		-0.0186101	0.134917	0.5547		0.0157827	0.30402	0.73551
KCTD2	17	FALSE	NA		0.0382497	0.0193262	0.418803		-0.0106922	0.489172	0.814546		-0.0182153	0.349566	0.769982
KCTD18	2	FALSE	NA		-0.0530968	0.0193342	0.418803		-0.00330819	0.880927	0.968777		0.0724538	0.00671581	0.282432
FBLL1	5	FALSE	NA		0.147928	0.0193967	0.418803		0.086837	0.178433	0.594892		-0.0281969	0.695756	0.921445
RNASEK	17	FALSE	NA		-0.038173	0.0194259	0.418803		-0.024501	0.117151	0.529573		0.0254106	0.183614	0.643444
ARL2BP	16	FALSE	NA		-0.0467576	0.0194312	0.418803		0.0236792	0.222463	0.633031		0.085485	0.000349955	0.0860395
CXorf38	X	FALSE	Escape		-0.0561035	0.0194385	0.418803		0.0514163	0.0426331	0.377284		0.0683951	0.02052	0.386429
CHURC1	14	FALSE	NA		-0.0421314	0.0194449	0.418803		-0.0467823	0.00769108	0.20542		0.0249013	0.2455	0.696237
NME5	5	FALSE	NA		-0.182157	0.0194453	0.418803		-0.0828425	0.246038	0.65442		0.161298	0.0779857	0.53661
TBC1D24	16	FALSE	NA		0.0677983	0.0194584	0.418803		0.0549959	0.049102	0.398271		-0.0547359	0.107575	0.57175
KCNF1	2	FALSE	NA		-0.15651	0.0194945	0.418844		0.0103976	0.868394	0.965331		0.0846241	0.314299	0.743027
PDCD10	3	FALSE	NA		-0.0368035	0.019504	0.418844		-0.04475	0.00332088	0.145398		0.0077773	0.675631	0.915013
GCSH	16	FALSE	NA		-0.0554952	0.0195663	0.419252		-0.0608387	0.00557298	0.176942		0.0212124	0.434119	0.816347
LY6G5B	6	FALSE	NA		0.104714	0.019577	0.419252		0.0384105	0.332829	0.717013		-0.085536	0.0842815	0.546781
KCNK3	2	FALSE	NA		-0.157013	0.0195885	0.419252		-0.0835714	0.177194	0.594598		0.110469	0.155616	0.614856
SPINT2	19	FALSE	NA		-0.159168	0.0196113	0.419272		-0.070465	0.269224	0.671478		0.0714222	0.332892	0.756378
CMPK1	1	FALSE	NA		-0.0373147	0.0196428	0.419478		0.0091919	0.542528	0.843867		0.0531379	0.00399612	0.25315
PFDN4	20	FALSE	NA		-0.0437575	0.0196656	0.419497		-0.0453422	0.0103484	0.233533		0.00267184	0.902488	0.977691
MAMSTR	19	FALSE	NA		0.159433	0.0197285	0.419728		0.0628592	0.346265	0.726659		-0.0636568	0.429495	0.81429
UGDH	4	FALSE	NA		-0.0672815	0.0197324	0.419728		-0.0354724	0.216078	0.626986		0.0231684	0.515868	0.85356
WIZ	19	FALSE	NA		0.0463783	0.0197421	0.419728		0.0218743	0.250577	0.658594		0.0106883	0.657624	0.909578
P2RX3	11	FALSE	NA		0.0932973	0.0197913	0.420064		0.113051	0.000466301	0.0596151		-0.0302851	0.421373	0.811075
MICAL1	6	FALSE	NA		0.120292	0.019802	0.420064		0.100375	0.0309591	0.339259		-0.0878557	0.119388	0.57862
ZGRF1	4	FALSE	NA		0.0761481	0.0198559	0.420064		0.0462196	0.142383	0.562943		-0.0419951	0.267763	0.71219
SCAI	9	FALSE	NA		0.0800152	0.0198607	0.420064		0.0191562	0.538843	0.841962		-0.0503507	0.194359	0.651269
PIR	X	FALSE	Variable		-0.127679	0.0198675	0.420064		-0.0677723	0.192828	0.607423		0.0452633	0.467067	0.830357
ZP2	16	FALSE	NA		-0.0408055	0.0199199	0.42071		-0.0249475	0.171271	0.589351		0.0530311	0.0188717	0.376589
PSMD6	3	FALSE	NA		-0.0326806	0.0199907	0.420866		-0.0143945	0.283515	0.681851		0.0112132	0.487428	0.839619
PRDM2	1	FALSE	NA		0.0544909	0.0199909	0.420866		0.00528483	0.807553	0.946759		-0.0560646	0.0326569	0.437334
PRDM13	6	FALSE	NA		0.152965	0.0199989	0.420866		-0.0199369	0.773925	0.935028		-0.0927578	0.233987	0.68597
SELPLG	12	FALSE	NA		0.249059	0.0200151	0.420866		0.398565	0.000109791	0.0267853		-0.057202	0.628684	0.899718
FBXL16	16	FALSE	NA		0.246571	0.0200486	0.421109		0.141771	0.154965	0.576869		-0.111306	0.384447	0.788636
SLC39A12	10	FALSE	NA		-0.0649453	0.02009	0.421517		-0.000575353	0.980865	0.995981		0.055822	0.0634822	0.510737
STRADA	17	FALSE	NA		0.0358484	0.0201848	0.422245		0.0338864	0.0320857	0.343786		-0.00440319	0.81784	0.953107
XIAP	X	FALSE	Inactive		-0.05569	0.02019	0.422245		-0.00112534	0.959581	0.99071		0.0289665	0.280282	0.721277
ITIH5	10	FALSE	NA		0.179305	0.0201908	0.422245		0.203364	0.00552672	0.176442		-0.0673159	0.451154	0.823805
BPIFB4	20	FALSE	NA		-0.102009	0.020269	0.423248		-0.0316507	0.437865	0.785935		0.0774082	0.152179	0.612196
SH3D19	4	FALSE	NA		-0.0974937	0.0203003	0.423248		-0.0448404	0.22134	0.631641		0.124381	0.00810029	0.303991
PTEN	10	FALSE	NA		-0.0962061	0.0203196	0.423248		-0.0427173	0.335101	0.719059		0.0186568	0.718274	0.927371
OR10A6	11	FALSE	NA		-0.0455687	0.020327	0.423248		-0.0109179	0.586916	0.862968		0.0313545	0.216262	0.671128
OTC	X	FALSE	Variable		-0.0723518	0.0203733	0.423331		-0.0102769	0.723794	0.917996		0.115571	0.00221514	0.20423
FAAH2	X	FALSE	Inactive		-0.207436	0.0203752	0.423331		0.112401	0.189575	0.605208		0.165799	0.114395	0.575822
C2CD4C	19	FALSE	NA		0.155222	0.0204079	0.423552		0.00114428	0.987878	0.996736		-0.128636	0.119213	0.57862
NPHP1	2	FALSE	NA		-0.111319	0.0204796	0.423879		-0.127984	0.00403457	0.157258		0.0265755	0.619915	0.895877
SPANXN5	X	FALSE	NA		-0.0463126	0.0204805	0.423879		-0.0465265	0.0258879	0.315479		0.0272646	0.288612	0.726781
MRPS10	6	FALSE	NA		-0.0408313	0.0205073	0.423879		-0.0289379	0.0822461	0.474784		0.0188791	0.352696	0.770256
KIF9	3	FALSE	NA		-0.0733061	0.0205121	0.423879		-0.00472752	0.887759	0.970369		0.0833699	0.0370885	0.45654
CBARP	19	FALSE	NA		0.151326	0.0206042	0.425008		-0.0415007	0.483688	0.811766		-0.201105	0.00642466	0.276926
CETN1	18	FALSE	NA		-0.0333395	0.0206247	0.425008		-0.0292538	0.0595189	0.427488		0.00102149	0.957987	0.991247
SPRYD3	12	FALSE	NA		-0.0546068	0.0206332	0.425008		-0.0320827	0.13452	0.5547		0.0322281	0.222695	0.676053
NRP1	10	FALSE	NA		-0.185884	0.0206957	0.425564		-0.111204	0.130505	0.548955		0.113728	0.202829	0.659031
ISL1	5	FALSE	NA		0.178673	0.0207217	0.425564		0.054634	0.518322	0.828943		-0.164366	0.08304	0.544906
CCN5	20	FALSE	NA		-0.199636	0.0207267	0.425564		-0.070227	0.354437	0.731886		0.0996593	0.318236	0.745338
BBIP1	10	FALSE	NA		-0.0466672	0.0207969	0.426549		-0.0180942	0.347815	0.727999		0.0307082	0.188052	0.646573
ELOB	16	FALSE	NA		-0.0343261	0.0208485	0.427149		-0.017219	0.21622	0.626986		0.036492	0.0334867	0.442041
PGM3	6	FALSE	NA		-0.0484185	0.0208725	0.427185		-0.0173106	0.408323	0.770205		0.0199613	0.434987	0.816768
POLD4	11	FALSE	NA		-0.0700005	0.0209382	0.42797		-0.0744794	0.00463908	0.165977		0.00667341	0.835116	0.959322
ALDH1A2	15	FALSE	NA		0.220197	0.0209555	0.42797		0.0687331	0.490897	0.815341		-0.143525	0.222107	0.675978
BCL10	1	FALSE	NA		-0.0604363	0.0209869	0.428155		-0.0615449	0.0147014	0.263262		0.0130757	0.667991	0.912805
LAMTOR5	1	FALSE	NA		-0.0345644	0.0210612	0.428584		-0.0195266	0.175927	0.593513		0.0213641	0.224727	0.677357
RBMS2	12	FALSE	NA		-0.107318	0.0210675	0.428584		-0.0526657	0.236358	0.647568		-0.0022071	0.966335	0.992941
IRS4	X	FALSE	NA		-0.0844317	0.0210978	0.428584		-0.0474303	0.168184	0.585796		0.041686	0.353444	0.770256
KREMEN2	16	FALSE	NA		0.204695	0.0211008	0.428584		-0.0790177	0.340922	0.723763		-0.170399	0.11125	0.575092
INSIG2	2	FALSE	NA		-0.059881	0.0211197	0.428584		-0.0116055	0.644998	0.887375		0.0313872	0.302654	0.734776
PI15	8	FALSE	NA		0.174468	0.0212055	0.429871		-0.0270736	0.720142	0.916827		-0.143165	0.0924692	0.55113
PRB1	12	FALSE	NA		-0.050934	0.0212443	0.430203		-0.0349519	0.146404	0.568354		0.0307185	0.309121	0.739084
TSHR	14	FALSE	NA		0.133797	0.0213004	0.430884		0.101845	0.0434694	0.379432		-0.00195949	0.973647	0.9935
HTR4	5	FALSE	NA		-0.0627911	0.0213381	0.431192		-0.0124727	0.598174	0.869335		0.048199	0.108661	0.571931
SNAPC2	19	FALSE	NA		0.0602924	0.0214115	0.432219		0.00183264	0.937849	0.982901		-0.0276923	0.347939	0.769336
FZD10	12	FALSE	NA		-0.144187	0.0215403	0.434362		-0.0178686	0.773813	0.935028		0.115822	0.144041	0.606612
IQCG	3	FALSE	NA		-0.10409	0.0215658	0.43442		-0.111957	0.00922711	0.222576		0.0558257	0.278219	0.719757
UXS1	2	FALSE	NA		-0.0492887	0.0216276	0.434816		-0.0378747	0.0520227	0.405954		0.051981	0.0330535	0.441412
DHX8	17	FALSE	NA		0.0336178	0.0216522	0.434816		0.0127104	0.350239	0.729419		-0.0219247	0.192769	0.650692
MEPE	4	FALSE	NA		-0.041003	0.0216535	0.434816		-0.0355309	0.0310312	0.339413		0.0308712	0.127874	0.58934
FBXO6	1	FALSE	NA		-0.175452	0.0217139	0.43483		-0.0203617	0.787961	0.93914		0.218121	0.0174379	0.365015
POLM	7	FALSE	NA		0.0723475	0.0217544	0.43483		0.0250028	0.415075	0.773994		-0.0883814	0.0194585	0.3829
CFHR2	1	FALSE	NA		-0.0558968	0.0217665	0.43483		-0.000466203	0.981838	0.996009		0.0530769	0.0373761	0.45654
YWHAQ	2	FALSE	NA		-0.026072	0.0217755	0.43483		-0.012953	0.248962	0.65677		0.0298829	0.0312278	0.431788
ZNF80	3	FALSE	NA		-0.0535952	0.0217766	0.43483		-0.012147	0.572794	0.856999		0.0256163	0.348358	0.769336
LAMP1	13	FALSE	NA		-0.0393062	0.0217966	0.43483		-0.0287224	0.0868595	0.484531		0.0146762	0.475105	0.834525
RPS6KL1	14	FALSE	NA		0.240691	0.0218129	0.43483		0.0848607	0.3586	0.734329		-0.0676349	0.5824	0.882737
IL13RA1	X	FALSE	Inactive		-0.101242	0.0219115	0.435911		-0.00681743	0.874168	0.967106		0.112505	0.0293332	0.428426
HPF1	4	FALSE	NA		-0.0632608	0.0219484	0.435911		0.0161066	0.514146	0.826885		0.0857111	0.00348528	0.24156
GTF2A2	15	FALSE	NA		-0.0376684	0.0219554	0.435911		-0.019385	0.214252	0.625757		0.0511347	0.00812565	0.304034
PLA2G2F	1	FALSE	NA		-0.0904396	0.0219581	0.435911		-0.0195524	0.606868	0.872245		0.109279	0.0221239	0.397686
MED1	17	FALSE	NA		0.0432111	0.0219829	0.435952		0.00209286	0.89968	0.973699		-0.0467191	0.0227473	0.398428
WDR27	6	FALSE	NA		0.0788426	0.0220059	0.435957		0.0177501	0.588487	0.863724		-0.114925	0.00494426	0.257016
OSMR	5	FALSE	NA		-0.195668	0.022041	0.436202		-0.139999	0.0647342	0.438128		0.00404679	0.964475	0.992855
COL25A1	4	FALSE	NA		0.151708	0.0220788	0.4365		0.088809	0.138362	0.556791		-0.0443514	0.523511	0.856894
PHF21A	11	FALSE	NA		0.0526798	0.022121	0.436884		-0.0168987	0.461934	0.800299		-0.0756179	0.00626818	0.275069
SUMF1	3	FALSE	NA		-0.0821381	0.0221623	0.436914		-0.053984	0.115438	0.527405		0.037066	0.369952	0.779749
SFSWAP	12	FALSE	NA		0.0331552	0.0221684	0.436914		-0.00654194	0.630246	0.881888		-0.037875	0.0252472	0.408566
THAP8	19	FALSE	NA		0.0982488	0.0222227	0.436914		0.0113721	0.771161	0.934975		-0.0736441	0.132074	0.593537
BRD9	5	FALSE	NA		0.0364136	0.0222326	0.436914		0.012166	0.425902	0.778601		-0.0106096	0.584625	0.883184
TFPI	2	FALSE	NA		-0.241163	0.0222512	0.436914		-0.191879	0.0416389	0.373252		-0.0521484	0.616006	0.894055
FGF12	3	FALSE	NA		0.191395	0.0222802	0.436914		0.0322987	0.725899	0.918546		-0.178613	0.0874629	0.549386
CD40LG	X	FALSE	Variable		-0.0469566	0.0223428	0.436914		-0.0128545	0.444248	0.788609		0.0648752	0.00206704	0.20328
MAN2C1	15	FALSE	NA		0.0494644	0.0223543	0.436914		0.0302449	0.128495	0.546687		-0.0230235	0.353577	0.770256
TJAP1	6	FALSE	NA		0.038568	0.0223628	0.436914		0.00580723	0.709088	0.912586		-0.0455395	0.0186034	0.374352
ANKHD1	5	FALSE	NA		0.0257351	0.0223679	0.436914		-0.00377374	0.738134	0.922583		-0.0226123	0.1074	0.57175
ADK	10	FALSE	NA		-0.0481274	0.0223829	0.436914		-0.0522372	0.00808429	0.211609		0.000674582	0.977647	0.994098
CENPS.CORT	1	FALSE	NA		-0.123674	0.0223959	0.436914		-0.0816122	0.122539	0.537937		0.0495442	0.423237	0.811536
UFD1	22	FALSE	NA		-0.0349116	0.0224945	0.437955		-0.038492	0.0104283	0.233533		0.00438151	0.815112	0.952509
KRT83	12	FALSE	NA		-0.111768	0.0224973	0.437955		-0.0257229	0.602602	0.870287		0.0764512	0.225065	0.677653
SLC25A34	1	FALSE	NA		0.117404	0.0225286	0.437955		0.00780939	0.87689	0.967567		-0.0744261	0.221287	0.675059
DEUP1	11	FALSE	NA		-0.106157	0.0225406	0.437955		-0.0407963	0.311383	0.703262		0.136439	0.00837542	0.304945
YWHAE	17	FALSE	NA		-0.0233869	0.0225644	0.437973		-0.0275267	0.00583804	0.181452		0.012849	0.301548	0.734516
CALML3	10	FALSE	NA		-0.137242	0.02264	0.438576		-0.126406	0.0604541	0.42954		0.0854238	0.274807	0.717916
ERVW.1	7	FALSE	Inactive		0.0997684	0.0226446	0.438576		0.0789388	0.0778273	0.46736		-0.0893492	0.10316	0.566099
FLNA	X	FALSE	Inactive		-0.049217	0.0226917	0.438576		0.000307247	0.988964	0.997022		0.0364896	0.179163	0.63925
ETV7	6	FALSE	NA		-0.209595	0.0227414	0.438576		0.0976995	0.243512	0.653397		0.209682	0.0458001	0.482721
MYL7	7	FALSE	NA		-0.138919	0.0227599	0.438576		-0.0205878	0.721152	0.916987		0.196206	0.00462571	0.255721
CFL1	11	FALSE	NA		-0.0250891	0.0227603	0.438576		-0.0109341	0.302006	0.695701		0.025086	0.0548941	0.497262
ATP2B3	X	FALSE	Inactive		0.113761	0.0228098	0.438576		0.111716	0.00899709	0.219234		0.00252753	0.958623	0.991247
PRKAG1	12	FALSE	NA		-0.040642	0.0228197	0.438576		-0.0353647	0.0295779	0.332633		0.0398834	0.0472103	0.483971
GDAP1L1	20	FALSE	NA		0.17774	0.022824	0.438576		0.0932899	0.158411	0.57794		-0.0315024	0.682064	0.916897
EBNA1BP2	1	FALSE	NA		-0.0382283	0.0228241	0.438576		-0.0309065	0.0439558	0.380388		0.0176021	0.35377	0.770271
NCOA3	20	FALSE	NA		-0.0726656	0.0228824	0.438878		-0.0642927	0.0273526	0.323279		-0.00370138	0.917359	0.982567
SELENOF	1	FALSE	NA		-0.026882	0.0228856	0.438878		-0.0290793	0.0146037	0.263262		-0.00149176	0.918945	0.982936
LAP3	4	FALSE	NA		-0.0409376	0.0229286	0.439213		-0.0162825	0.348323	0.72809		0.0200016	0.337993	0.760049
BCCIP	10	FALSE	NA		-0.0388404	0.0229668	0.439213		-0.0496088	0.0018376	0.117466		0.00164156	0.932699	0.985888
KIF5C	2	FALSE	NA		0.206593	0.0229718	0.439213		0.0980501	0.276775	0.676184		-0.0225166	0.836366	0.95973
STRC	15	FALSE	NA		0.126313	0.0230427	0.439437		0.108233	0.041953	0.373804		-0.0662255	0.287781	0.725917
CEP131	17	FALSE	NA		0.0840805	0.0230469	0.439437		0.00387119	0.903305	0.974352		-0.0576276	0.165756	0.627041
RPP38	10	FALSE	NA		-0.0450819	0.0230881	0.439437		-0.0354623	0.0526263	0.407598		0.0428792	0.0557624	0.498824
CD44	11	FALSE	NA		-0.152872	0.0230976	0.439437		-0.086575	0.208905	0.620604		0.0214178	0.777629	0.943243
DBI	2	FALSE	NA		-0.043512	0.0230981	0.439437		-0.00315813	0.865017	0.964992		0.045301	0.0449204	0.481251
GPRC5C	17	FALSE	NA		-0.208347	0.0231387	0.439501		0.0274019	0.771968	0.934975		0.374155	0.00104385	0.149777
LCA5L	21	FALSE	NA		-0.126085	0.0231473	0.439501		0.0877832	0.0923184	0.491099		0.156503	0.0155513	0.355854
NPTN	15	FALSE	NA		-0.0372237	0.0231812	0.439561		-0.0268677	0.0731367	0.456706		0.0267113	0.151008	0.610953
C6orf141	6	FALSE	NA		-0.241821	0.0232002	0.439561		-0.182787	0.0760738	0.462839		-0.0350626	0.7708	0.940926
ARAP1	11	FALSE	NA		0.0461496	0.0232865	0.439561		0.00303593	0.877075	0.96757		-0.057072	0.0206892	0.386429
PRAF2	X	FALSE	Inactive		0.11009	0.023288	0.439561		0.0574679	0.21009	0.62181		-0.0241731	0.663946	0.911417
TOP2B	3	FALSE	NA		-0.0409997	0.0233137	0.439561		-0.0146527	0.403568	0.767096		0.0309754	0.136551	0.596881
BRK1	3	FALSE	NA		-0.0301309	0.0233139	0.439561		-0.0250763	0.0553307	0.413203		0.0318212	0.0464276	0.483971
SPDYA	2	FALSE	NA		0.118318	0.0233264	0.439561		0.0594028	0.236764	0.647604		-0.00121646	0.983814	0.996319
SHOX	X	TRUE	Escape		-0.0726478	0.0233338	0.439561		0.00332419	0.90714	0.975665		0.099951	0.00719956	0.286162
OTUD3	1	FALSE	NA		0.0818854	0.0233604	0.439597		0.0463724	0.173354	0.591217		-0.0204284	0.626395	0.898691
H3C13	1	FALSE	NA		0.193325	0.0233816	0.439597		0.0641902	0.425245	0.778208		-0.107106	0.276014	0.718791
CETN2	X	FALSE	Inactive		-0.0468532	0.0234076	0.439609		-0.0161705	0.408536	0.770354		0.0551033	0.0226814	0.398428
IER3	6	FALSE	NA		-0.134231	0.0234281	0.439609		-0.149528	0.00326963	0.143907		0.00304624	0.961434	0.991929
AMIGO2	12	FALSE	NA		-0.198659	0.0235159	0.439896		-0.127976	0.109196	0.519447		-0.0522409	0.605376	0.890682
LRP2BP	4	FALSE	NA		0.12367	0.0235291	0.439896		0.0906586	0.0640578	0.436481		-0.0105215	0.860015	0.966792
OPTN	10	FALSE	NA		-0.106988	0.0235317	0.439896		-0.0868853	0.0311671	0.339571		-0.00221143	0.963184	0.992508
KRT31	17	FALSE	NA		-0.0916044	0.0235482	0.439896		-0.0642815	0.111582	0.521414		0.0638598	0.201725	0.658333
FAM25C	10	FALSE	NA		-0.146264	0.0235585	0.439896		-0.0124064	0.842498	0.959045		0.0840426	0.314399	0.743027
HSPB11	1	FALSE	NA		-0.0418643	0.0235872	0.439896		0.0139258	0.44189	0.787645		0.0393209	0.0720744	0.525724
TSPY8	Y	FALSE	NA		0.0727957	0.0236254	0.439896		0.0840779	0.000590125	0.0663028		0.0324006	0.270181	0.71448
VASH1	14	FALSE	NA		0.177812	0.0236733	0.439896		0.0607034	0.424181	0.777659		-0.0470511	0.608307	0.891421
KAAG1	6	FALSE	NA		-0.109679	0.02369	0.439896		-0.0418585	0.34987	0.72913		0.160791	0.00299177	0.225879
OR2AG1	11	FALSE	NA		-0.0324571	0.0237093	0.439896		-0.0205423	0.115434	0.527405		0.0409344	0.011389	0.325645
OR4X2	11	FALSE	NA		-0.0290105	0.0237269	0.439896		-0.0126921	0.270858	0.672261		0.0294954	0.0388089	0.462547
BTBD11	12	FALSE	NA		-0.260755	0.0237354	0.439896		0.0454376	0.648076	0.888456		0.151474	0.236998	0.688771
UNC93B1	11	FALSE	NA		-0.099183	0.0237416	0.439896		-0.0397335	0.342361	0.724585		0.0193949	0.695728	0.921445
CLEC4E	12	FALSE	NA		-0.0711238	0.0237892	0.440353		-0.0778463	0.00907527	0.220299		0.0693887	0.0538485	0.497125
NDUFV2	18	FALSE	NA		-0.0380145	0.0239011	0.44109		-0.00337902	0.831846	0.954471		0.0647719	0.000920798	0.143603
CTAGE15	7	FALSE	NA		-0.126438	0.0239154	0.44109		-0.0816766	0.16484	0.584269		0.156819	0.0173632	0.364305
RELL2	5	FALSE	NA		0.115512	0.0239291	0.44109		0.0726945	0.129795	0.547651		-0.109045	0.0682432	0.519173
VTI1A	10	FALSE	NA		-0.038136	0.0239373	0.44109		-0.0573559	0.000595894	0.0663028		-0.0177691	0.371794	0.780844
CEACAM8	19	FALSE	NA		-0.0609569	0.023944	0.44109		-0.0158352	0.483863	0.811957		0.0555305	0.0528113	0.497125
GALNT15	3	FALSE	NA		-0.131195	0.0239701	0.441146		0.0316606	0.477795	0.809209		0.146072	0.0171319	0.362626
AGAP2	12	FALSE	NA		0.147296	0.0240082	0.441425		0.0779844	0.249351	0.657112		-0.0452438	0.575746	0.879734
PCDHGB3	5	FALSE	NA		0.135156	0.0240886	0.442268		0.0760212	0.192174	0.607423		-0.112737	0.113413	0.575742
ANXA4	2	FALSE	NA		-0.0737536	0.0241002	0.442268		-0.00287214	0.921682	0.980494		0.103675	0.00496933	0.257016
CST11	20	FALSE	NA		-0.0393876	0.0241789	0.443287		-0.0143896	0.336373	0.719671		0.037426	0.0453837	0.482287
FAM9B	X	FALSE	Variable		-0.130805	0.0242081	0.443342		-0.068639	0.203309	0.616037		0.0998479	0.14783	0.608655
CRIM1	2	FALSE	NA		-0.175476	0.0242481	0.443342		-0.115712	0.0656	0.440281		-0.061202	0.417953	0.809755
CMC2	16	FALSE	NA		-0.0316205	0.0242678	0.443342		-0.0357155	0.0103263	0.233533		0.0281953	0.103821	0.567203
CFAP52	17	FALSE	NA		-0.101473	0.0242953	0.443342		-0.0488423	0.24523	0.65442		0.105392	0.0371653	0.45654
IL11	19	FALSE	NA		-0.209836	0.0243257	0.443342		-0.00561241	0.953135	0.988603		0.0363202	0.745866	0.933281
CCDC89	11	FALSE	NA		0.132354	0.0243389	0.443342		0.0382601	0.558343	0.851743		-0.025816	0.705713	0.923541
SLC25A38	3	FALSE	NA		-0.049409	0.0243841	0.443342		-0.00577223	0.805696	0.946568		0.0757705	0.00867547	0.305913
SOX30	5	FALSE	NA		-0.0783456	0.02439	0.443342		-0.0115669	0.765476	0.932508		-0.0377203	0.467956	0.830357
SH2D1B	1	FALSE	NA		-0.147911	0.0244088	0.443342		0.00730357	0.891294	0.971542		0.114394	0.117704	0.577354
IL6ST	5	FALSE	NA		-0.0945212	0.0244425	0.443342		-0.0290367	0.457209	0.797154		0.0364348	0.436708	0.816995
RECQL5	17	FALSE	NA		0.0436373	0.0244946	0.443342		0.0144603	0.412605	0.772078		-0.0305679	0.166914	0.627508
CBSL	21	FALSE	NA		0.282005	0.0245858	0.443342		0.239257	0.0539269	0.41126		-0.0250916	0.872143	0.969845
EIF6	20	FALSE	NA		-0.0310411	0.0246289	0.443342		-0.0352901	0.00971162	0.228491		0.0289054	0.0902077	0.550984
MAP2	2	FALSE	NA		0.241658	0.0246414	0.443342		0.160323	0.117198	0.529573		-0.246362	0.0459831	0.482721
TSBP1	6	FALSE	NA		-0.0472258	0.0246629	0.443342		-0.0714874	0.000438166	0.056775		0.0316467	0.189488	0.648143
PCDHGA6	5	FALSE	NA		0.134205	0.0246736	0.443342		0.0791773	0.165627	0.584399		-0.0775174	0.267367	0.711886
RBIS	8	FALSE	NA		-0.0422809	0.0246803	0.443342		-0.0305639	0.0773821	0.465628		0.0240159	0.255259	0.702917
NECAB2	16	FALSE	NA		0.169463	0.0247005	0.443342		0.104968	0.178162	0.594892		-0.0268768	0.761825	0.937899
CSE1L	20	FALSE	NA		-0.0343863	0.0247063	0.443342		-0.0240275	0.111177	0.521026		0.0313244	0.0977267	0.558767
CPO	2	FALSE	NA		0.05897	0.0247689	0.443342		0.0738834	0.000976018	0.0831067		0.0518665	0.0518075	0.494039
CHST2	3	FALSE	NA		0.220832	0.0248441	0.443342		-0.0035547	0.969757	0.992787		-0.196262	0.0779559	0.536597
MED22	9	FALSE	NA		0.041474	0.0248802	0.443342		0.0319827	0.0696367	0.448071		-0.0337556	0.123037	0.583004
KNG1	3	FALSE	NA		-0.0766734	0.024916	0.443342		-0.0594212	0.0757642	0.462339		0.0802302	0.0438882	0.478751
SERPINB11	18	FALSE	NA		-0.0860826	0.0249357	0.443342		-0.0559903	0.0976865	0.500089		0.0887538	0.0359471	0.451445
TPD52L1	6	FALSE	NA		-0.155821	0.0249678	0.443342		-0.106444	0.120801	0.535405		-0.0243882	0.776908	0.942841
VASP	19	FALSE	NA		-0.0554393	0.0249691	0.443342		-0.0436732	0.053797	0.411004		0.028359	0.303207	0.735187
ATP6V1B2	8	FALSE	NA		0.0459204	0.0249696	0.443342		0.0197176	0.307559	0.700815		-0.0366209	0.115521	0.576364
ATMIN	16	FALSE	NA		-0.0416596	0.0250004	0.443342		-0.0215336	0.206202	0.618405		0.0508026	0.0169106	0.361817
TMC2	20	FALSE	NA		0.0537625	0.0250058	0.443342		0.0404242	0.11326	0.525535		-0.0256254	0.406274	0.802506
IFIH1	2	FALSE	NA		-0.160778	0.0250477	0.443342		-0.00738444	0.917334	0.979003		0.0419246	0.602059	0.890202
ACAP3	1	FALSE	NA		0.0858314	0.0250551	0.443342		0.0600625	0.0766903	0.463552		-0.0209477	0.632469	0.901786
ISY1.RAB43	3	FALSE	NA		-0.0955217	0.0250713	0.443342		-0.0486399	0.213279	0.624913		-0.0310549	0.485858	0.838479
MTMR7	8	FALSE	NA		0.148059	0.0250993	0.443342		0.190247	0.000942352	0.0817691		0.0786073	0.265238	0.710565
NDUFS4	5	FALSE	NA		-0.0402181	0.0251004	0.443342		-0.0301309	0.069699	0.448071		0.0381263	0.0628731	0.510239
DAGLA	11	FALSE	NA		0.110394	0.0251071	0.443342		0.0887325	0.0914776	0.49056		-0.0379835	0.5511	0.869975
CMTR2	16	FALSE	NA		-0.0540113	0.0251209	0.443342		0.00158749	0.945158	0.985284		0.0203157	0.455604	0.825737
PGBD5	1	FALSE	NA		0.229789	0.0251246	0.443342		0.300593	0.0020385	0.121783		0.086932	0.455901	0.825857
ZNF600	19	FALSE	NA		-0.180612	0.025164	0.443342		-0.0304204	0.69508	0.907304		0.0636143	0.469478	0.830732
ARID3A	19	FALSE	NA		0.116166	0.0251652	0.443342		-0.00180116	0.971725	0.993136		-0.0600106	0.343478	0.764406
KRT84	12	FALSE	NA		-0.0838118	0.0251804	0.443342		-0.0287026	0.368227	0.742249		0.11463	0.00376264	0.24796
TCAP	17	FALSE	NA		0.12498	0.0251856	0.443342		0.0536915	0.345622	0.726216		-0.0675314	0.336455	0.758548
DAZAP2	12	FALSE	NA		-0.0314484	0.0251861	0.443342		-0.0391454	0.00298825	0.139526		0.00954299	0.554418	0.871921
PMVK	1	FALSE	NA		-0.0487469	0.0251942	0.443342		-0.0491707	0.0159625	0.268049		0.0535494	0.031663	0.431788
LYZ	12	FALSE	NA		-0.299263	0.0252	0.443342		-0.00974005	0.938619	0.983304		0.439236	0.0031107	0.231217
CDH24	14	FALSE	NA		0.116825	0.0252222	0.443342		0.00581707	0.893491	0.972322		-0.108534	0.0571989	0.499728
TSC22D1	13	FALSE	NA		-0.0688773	0.0252574	0.443554		-0.0132275	0.650609	0.889827		0.0509567	0.15016	0.610075
PPP1R42	8	FALSE	NA		-0.102592	0.0253136	0.443829		0.0361952	0.345488	0.726216		0.0840538	0.0948787	0.554215
VAMP8	2	FALSE	NA		-0.159474	0.0253193	0.443829		-0.159604	0.0161607	0.268721		0.0582675	0.488265	0.840268
H1.6	6	FALSE	NA		-0.0674491	0.0254392	0.445523		-0.0636596	0.028939	0.332382		0.0438259	0.228135	0.680375
WDR83	19	FALSE	NA		0.0417482	0.0255445	0.446341		-0.0130654	0.450511	0.792683		-0.0281649	0.192468	0.650619
DYNLL1	12	FALSE	NA		-0.0267097	0.0255448	0.446341		-0.0314346	0.0055709	0.176942		0.0224137	0.112631	0.575742
ZNF777	7	FALSE	NA		0.0662106	0.025579	0.446341		0.0552727	0.0341838	0.348509		-0.028564	0.381896	0.787482
FBXO36	2	FALSE	NA		-0.125599	0.0257208	0.446341		-0.0298971	0.579798	0.859179		0.0460375	0.484417	0.838205
XKR6	8	FALSE	NA		0.21499	0.0257219	0.446341		0.287746	0.00135538	0.0983174		0.112164	0.311434	0.740623
ACP5	19	FALSE	NA		0.25402	0.0257232	0.446341		-0.10093	0.346645	0.726894		-0.408203	0.00109629	0.151333
SHBG	17	FALSE	NA		-0.119317	0.0257302	0.446341		-0.0046748	0.926422	0.981276		0.000114948	0.998638	0.999733
SNX33	15	FALSE	NA		-0.110989	0.0257385	0.446341		-0.0702414	0.0812992	0.472483		-0.0160758	0.738444	0.93252
EYA1	8	FALSE	NA		0.19673	0.0257794	0.446341		0.0862804	0.338788	0.721801		-0.274631	0.0122107	0.33262
TMED2	12	FALSE	NA		-0.0244435	0.025799	0.446341		-0.0286572	0.00713973	0.199299		0.00872032	0.506983	0.847638
CUL9	6	FALSE	NA		0.0709196	0.0258038	0.446341		0.010784	0.701777	0.909983		-0.0526007	0.136215	0.596666
ZBTB38	3	FALSE	NA		-0.0926929	0.0258305	0.446341		-0.0243525	0.525719	0.833269		0.00105552	0.981089	0.995357
TTBK2	15	FALSE	NA		0.0734107	0.0258308	0.446341		-0.017273	0.611283	0.873795		-0.112859	0.00749869	0.291098
FOXL1	16	FALSE	NA		-0.224167	0.0258552	0.446341		-0.213878	0.0367507	0.356516		-0.184467	0.144294	0.606612
GNG12	1	FALSE	NA		-0.105305	0.0258571	0.446341		-0.0497526	0.236499	0.647604		-0.00101764	0.983325	0.996319
GK	X	FALSE	Inactive		0.121701	0.025884	0.446341		0.120936	0.0219935	0.298478		-0.0216527	0.734563	0.931846
ABCA1	9	FALSE	NA		-0.227566	0.0258988	0.446341		0.0224796	0.809642	0.946969		0.1565	0.17625	0.636693
STK17B	2	FALSE	NA		-0.0981259	0.0259213	0.446341		-0.0663681	0.136106	0.555657		-0.00291223	0.953	0.990734
RIDA	8	FALSE	NA		-0.0616895	0.0259281	0.446341		-0.0352216	0.162669	0.582289		0.0329632	0.284143	0.72439
ADORA2B	17	FALSE	NA		-0.132402	0.0260261	0.446676		-0.128003	0.0314738	0.340794		-0.0307728	0.647377	0.906677
PAGE2B	X	FALSE	NA		-0.181377	0.0260405	0.446676		-0.0706461	0.324989	0.713545		0.122481	0.21877	0.672875
RUNDC1	17	FALSE	NA		0.0396895	0.0260537	0.446676		0.0275695	0.100615	0.503675		-0.00448833	0.832282	0.958024
ANKS1A	6	FALSE	NA		0.0740519	0.0260568	0.446676		0.0193466	0.514335	0.826972		-0.114943	0.00173382	0.184724
TFPI2	7	FALSE	NA		-0.271795	0.0260718	0.446676		-0.338437	0.00209653	0.122204		0.175111	0.239227	0.690322
KLF17	1	FALSE	NA		-0.0891049	0.0260873	0.446676		-0.0477011	0.181048	0.596577		0.0912417	0.0395998	0.467039
FAM83A	8	FALSE	NA		-0.215697	0.0261571	0.44742		-0.151427	0.0922017	0.491099		-0.0199383	0.870166	0.969498
MTR	1	FALSE	NA		0.0520844	0.0261775	0.44742		0.0456174	0.0322238	0.343981		0.0132554	0.611793	0.893581
TMEM217	6	FALSE	NA		-0.156912	0.0262127	0.447623		0.020674	0.750135	0.92701		0.174008	0.0314802	0.431788
FBXO10	9	FALSE	NA		0.104679	0.0262464	0.447799		0.0483705	0.269496	0.671478		-0.155375	0.00264268	0.21848
ARHGAP33	19	FALSE	NA		0.122518	0.0262951	0.447887		0.0868639	0.0935521	0.492916		-0.0233378	0.71951	0.927911
ATM	11	FALSE	NA		0.0525728	0.0263073	0.447887		-0.033838	0.123513	0.539249		-0.0766507	0.00432426	0.254288
WDR90	16	FALSE	NA		0.0841278	0.0263216	0.447887		0.0617457	0.0695633	0.448071		-0.0172647	0.694889	0.920894
LHPP	10	FALSE	NA		-0.108026	0.0263658	0.447957		-0.123582	0.00616934	0.185479		-0.0313775	0.553959	0.871739
CITED1	X	FALSE	Inactive		0.217572	0.0263834	0.447957		0.125517	0.169038	0.586919		-0.152552	0.164319	0.626595
NMNAT3	3	FALSE	NA		-0.247262	0.0263957	0.447957		-0.0991502	0.354291	0.731665		0.238723	0.0671649	0.515621
ZDHHC7	16	FALSE	NA		-0.0414414	0.0264686	0.448402		-0.0255823	0.125889	0.542688		0.0191726	0.353661	0.770263
MAP1LC3B	16	FALSE	NA		-0.0539351	0.0264786	0.448402		-0.0161123	0.473752	0.806795		0.0438505	0.108917	0.571931
PSMA5	1	FALSE	NA		-0.028945	0.0264921	0.448402		-0.0228124	0.079444	0.468597		-0.000564069	0.971708	0.993043
RBP2	3	FALSE	NA		-0.09486	0.0265624	0.4488		0.0309567	0.450675	0.792826		0.0702934	0.186621	0.645958
HERC4	10	FALSE	NA		-0.0525724	0.0265625	0.4488		-0.0333145	0.132667	0.551878		0.0120931	0.653118	0.908646
MANBAL	20	FALSE	NA		-0.031321	0.0266741	0.450291		-0.0164647	0.20501	0.616703		0.0255783	0.115036	0.575993
EEF1A2	20	FALSE	NA		0.211145	0.0267705	0.450867		0.149271	0.0864154	0.48432		0.061365	0.631608	0.901372
BCAS4	20	FALSE	NA		-0.116911	0.0267747	0.450867		-0.0805197	0.117556	0.530384		0.103116	0.105037	0.568886
KIF1A	2	FALSE	NA		0.188626	0.0267857	0.450867		0.0288479	0.768499	0.933995		0.0630404	0.546856	0.869357
DYNC2LI1	2	FALSE	NA		-0.0535429	0.0268023	0.450867		-0.0189857	0.486276	0.81323		0.0796769	0.0207289	0.386429
DBN1	5	FALSE	NA		0.0865061	0.0268604	0.451001		0.0090508	0.79547	0.942419		-0.112082	0.0111308	0.324667
ARF4	3	FALSE	NA		-0.0348193	0.0268883	0.451001		-0.0160197	0.273259	0.673935		0.0215974	0.226979	0.679695
RNF44	5	FALSE	NA		0.0549546	0.0269059	0.451001		0.0440804	0.0544488	0.412485		-0.0429906	0.12892	0.590895
SMIM10L2B	X	FALSE	NA		-0.111205	0.0269319	0.451001		0.0672975	0.119297	0.533473		0.132663	0.016736	0.360569
NGLY1	3	FALSE	NA		-0.0413087	0.0269702	0.451001		-0.0307455	0.0873765	0.484531		-0.00964121	0.645006	0.905909
NLRP2B	X	FALSE	NA		-0.0418741	0.027041	0.451001		-0.0195926	0.215001	0.62613		0.0494977	0.0120067	0.328463
VPS4B	18	FALSE	NA		-0.0371897	0.027083	0.451001		-0.0124171	0.474332	0.806795		0.0481627	0.0239672	0.404113
EHMT2	6	FALSE	NA		0.036062	0.0270889	0.451001		0.00888599	0.560766	0.852156		-0.0103973	0.582431	0.882737
BOK	2	FALSE	NA		-0.153692	0.0270905	0.451001		-0.117887	0.0482049	0.396804		-0.106967	0.137079	0.597338
XYLT2	17	FALSE	NA		0.0567877	0.0270941	0.451001		0.00641647	0.785187	0.938534		-0.0385351	0.204254	0.660785
NOSIP	19	FALSE	NA		-0.0341428	0.0271227	0.451001		-0.0553577	0.000148818	0.0303605		-0.012473	0.481529	0.837122
CNIH2	11	FALSE	NA		0.156616	0.0271248	0.451001		0.196384	0.00545659	0.176163		0.0421259	0.629023	0.899718
CRY2	11	FALSE	NA		0.0643467	0.0271629	0.451001		0.0253163	0.347251	0.727546		-0.0592169	0.0718197	0.525724
SS18L2	3	FALSE	NA		-0.0459012	0.0272145	0.451001		-0.0286261	0.153188	0.574648		0.0348164	0.14466	0.607005
CCDC130	19	FALSE	NA		0.0370365	0.0272574	0.451001		0.027518	0.0896368	0.487876		-0.011216	0.572361	0.878473
OBP2B	9	FALSE	NA		-0.0551297	0.0272728	0.451001		0.00198286	0.939315	0.983537		0.013588	0.689869	0.919745
PIANP	12	FALSE	NA		0.170691	0.0272786	0.451001		0.0975057	0.174318	0.592133		0.037477	0.658412	0.909929
CFDP1	16	FALSE	NA		-0.0346422	0.0272828	0.451001		-0.0226093	0.129368	0.546928		0.0239787	0.192038	0.650229
ELMO1	7	FALSE	NA		0.152924	0.027299	0.451001		0.157009	0.0413384	0.3717		-0.108512	0.210855	0.666014
ADGRG7	3	FALSE	NA		-0.129052	0.0273148	0.451001		-0.0147509	0.777388	0.936241		0.218876	0.00112559	0.151333
PAGE3	X	FALSE	NA		-0.0399583	0.0273337	0.451001		-0.0240142	0.154756	0.576601		0.0404419	0.0545944	0.497195
TDRD15	2	FALSE	NA		-0.0482921	0.0273408	0.451001		-0.113942	9.66e-05	0.0246923		-0.0182552	0.61144	0.893378
APCDD1L	20	FALSE	NA		-0.179966	0.0273803	0.451001		-0.120695	0.140415	0.560752		-0.0314926	0.774733	0.942371
TGFBR2	3	FALSE	NA		-0.180827	0.02742	0.451001		-0.159835	0.041932	0.373804		0.0312697	0.726986	0.929995
PIM3	22	FALSE	NA		0.0613587	0.0274565	0.451001		0.0140649	0.577252	0.858205		-0.0434423	0.177732	0.638549
GSTM2	1	FALSE	NA		0.187821	0.0274567	0.451001		0.12759	0.179532	0.595749		0.0806003	0.433891	0.816321
KBTBD2	7	FALSE	NA		0.0357483	0.0274636	0.451001		0.00586248	0.694311	0.907304		-0.038728	0.0386904	0.461422
DUX4	4	FALSE	NA		-0.0363555	0.027482	0.451001		-0.0110472	0.440848	0.787429		0.0384571	0.0316956	0.431788
JAG1	20	FALSE	NA		-0.155554	0.0274984	0.451001		-0.0611476	0.328018	0.714762		0.013601	0.86181	0.967166
HIF1A	14	FALSE	NA		-0.045838	0.0275281	0.451001		-0.0351994	0.0766101	0.463552		0.0226733	0.346405	0.767535
S100A7	1	FALSE	NA		-0.189926	0.0275587	0.451001		-0.120572	0.134156	0.554301		0.177139	0.0860147	0.547666
C19orf18	19	FALSE	NA		-0.137198	0.0276101	0.451001		-0.0345435	0.532905	0.83782		0.18248	0.00864727	0.305913
RAC1	7	FALSE	NA		-0.0280807	0.0276203	0.451001		-0.028635	0.01786	0.275584		0.0291924	0.0535387	0.497125
AQP2	12	FALSE	NA		-0.0722178	0.0276299	0.451001		-0.0623476	0.0485199	0.397183		0.0349083	0.38497	0.789412
CISD2	4	FALSE	NA		-0.0343386	0.0276335	0.451001		-0.0234639	0.123532	0.539249		0.0189877	0.305324	0.736454
RNF26	11	FALSE	NA		0.0620748	0.0277079	0.451115		-0.0196814	0.379459	0.749886		-0.0786193	0.00617409	0.273585
PCED1B	12	FALSE	NA		-0.215125	0.0277215	0.451115		0.0284785	0.758083	0.930149		0.139991	0.227755	0.680215
TEX44	2	FALSE	NA		-0.0323386	0.0277416	0.451115		-0.0129481	0.325648	0.713545		0.0280928	0.0863673	0.547666
FCF1	14	FALSE	NA		-0.0400345	0.0277578	0.451115		-0.048673	0.00318101	0.142196		-0.00836884	0.6766	0.915073
AMOTL2	3	FALSE	NA		-0.117134	0.027758	0.451115		-0.0376134	0.410351	0.771197		0.0224684	0.68846	0.919579
SLC43A3	11	FALSE	NA		0.24153	0.0277964	0.451311		0.0240611	0.824856	0.952924		-0.254312	0.0403348	0.470235
ACOX3	4	FALSE	NA		-0.0580399	0.027825	0.451311		-0.0172989	0.497998	0.818512		0.0652406	0.0343811	0.446391
TRPV2	17	FALSE	NA		0.224873	0.0278407	0.451311		-0.00721426	0.943298	0.984791		-0.292192	0.0118597	0.326586
IBSP	4	FALSE	NA		-0.0915023	0.0279293	0.452116		-0.0641699	0.0990498	0.501683		0.0130739	0.797787	0.948631
NIF3L1	2	FALSE	NA		-0.0337994	0.0279375	0.452116		-0.0107389	0.46865	0.804234		0.0347747	0.054303	0.497125
DEFB119	20	FALSE	NA		-0.0436102	0.0280057	0.452837		-0.0157066	0.356359	0.73325		0.0629521	0.00320578	0.234646
FOXRED1	11	FALSE	NA		0.0417365	0.0280735	0.453552		0.00211529	0.904514	0.974712		-0.0199993	0.365007	0.776976
IGSF11	3	FALSE	NA		0.197759	0.0281232	0.453972		-0.0139939	0.880776	0.968777		-0.101442	0.302457	0.734776
UNC5C	4	FALSE	NA		0.166311	0.0281522	0.454057		0.130529	0.0552937	0.413203		-0.00800224	0.916177	0.982183
MYL2	12	FALSE	NA		-0.139547	0.0282161	0.45465		0.0202501	0.722	0.917252		0.0937843	0.236483	0.688298
SOWAHD	X	FALSE	NA		-0.173225	0.0282364	0.45465		0.046918	0.481129	0.810889		0.216702	0.0114616	0.326115
PLD6	17	FALSE	NA		0.161712	0.0282834	0.455026		0.0466913	0.469561	0.804954		-0.0758518	0.369005	0.779395
ROMO1	20	FALSE	NA		-0.0343894	0.0283959	0.455551		-0.0311149	0.0360454	0.354534		0.0303138	0.0998258	0.563378
NDUFS5	1	FALSE	NA		-0.0325685	0.0283988	0.455551		-0.0333936	0.0145946	0.263262		0.0189285	0.263001	0.708366
METTL5	2	FALSE	NA		-0.0320471	0.0284103	0.455551		-0.0230242	0.098674	0.501529		0.0200363	0.241539	0.693516
PCSK2	20	FALSE	NA		0.129246	0.0284511	0.455551		0.0417102	0.488569	0.814366		-0.0793316	0.230225	0.682701
PAG1	8	FALSE	NA		0.216011	0.0284567	0.455551		0.168112	0.0751911	0.461273		-0.0456603	0.693769	0.920738
CIPC	14	FALSE	NA		0.0521536	0.0284586	0.455551		0.0214493	0.315473	0.706373		-0.0351515	0.183711	0.643444
H2BC6	6	FALSE	NA		-0.146906	0.028535	0.456394		-0.131502	0.0446299	0.382596		0.166317	0.035614	0.451445
HTRA1	10	FALSE	NA		-0.184442	0.0285948	0.456895		-0.0761126	0.399253	0.763816		0.114788	0.26514	0.710534
AL035425.2	NA	FALSE	NA		-0.0795192	0.0286425	0.456895		-0.018711	0.558947	0.851745		0.038357	0.366494	0.77767
PFDN1	5	FALSE	NA		-0.0302737	0.0286462	0.456895		-0.0226015	0.0868128	0.484531		0.0143113	0.377614	0.784732
GBP2	1	FALSE	NA		-0.21591	0.0287553	0.456895		-0.011564	0.904548	0.974712		0.238956	0.0413068	0.472355
RBM26	13	FALSE	NA		0.040981	0.028771	0.456895		0.0313334	0.0615269	0.431073		-0.020822	0.312472	0.741679
COMT	22	FALSE	NA		-0.0458245	0.02878	0.456895		-0.0309775	0.130116	0.548524		-0.0111833	0.650454	0.907644
INSC	11	FALSE	NA		-0.143087	0.0288036	0.456895		-0.0194322	0.724809	0.918378		0.105391	0.16652	0.627041
IFNA13	9	FALSE	NA		-0.0531675	0.0288163	0.456895		-0.0327553	0.129328	0.546928		0.0196741	0.47074	0.831529
XPO5	6	FALSE	NA		0.0370585	0.0288399	0.456895		0.00179403	0.910123	0.976597		-0.0353247	0.072459	0.526282
SLC7A8	14	FALSE	NA		-0.251189	0.0288456	0.456895		-0.267719	0.0182706	0.278297		0.211563	0.128806	0.590895
FAM209A	20	FALSE	NA		0.0803262	0.0288561	0.456895		0.0566994	0.121146	0.535694		-0.0351477	0.424139	0.811701
SEPTIN4	17	FALSE	NA		0.184774	0.0288843	0.456895		0.193681	0.0270743	0.322487		-0.146029	0.167767	0.628454
UBE2O	17	FALSE	NA		0.0438175	0.0289066	0.456895		0.0168399	0.371331	0.743869		-0.0158384	0.499111	0.843969
ASZ1	7	FALSE	NA		-0.0817598	0.0289171	0.456895		-0.00831828	0.78141	0.937963		0.0916341	0.0155982	0.355854
ZNF491	19	FALSE	NA		-0.151477	0.0289237	0.456895		0.066345	0.276561	0.675924		0.250337	0.0016672	0.180632
RAB11FIP5	2	FALSE	NA		-0.0860153	0.0290505	0.458281		0.0214942	0.569935	0.855751		0.0756067	0.0888337	0.549891
STMN2	8	FALSE	NA		0.166694	0.0290592	0.458281		0.150281	0.0278393	0.325674		0.0503398	0.536119	0.864223
KBTBD11	8	FALSE	NA		0.230893	0.0291219	0.4583		0.323891	0.000793174	0.0749629		-0.0336181	0.779054	0.943833
NIPSNAP2	7	FALSE	NA		-0.0420217	0.0291335	0.4583		-0.0108532	0.561472	0.852235		0.0664436	0.00445537	0.254288
CD6	11	FALSE	NA		0.101763	0.0291539	0.4583		0.0288011	0.558139	0.851616		-0.0503846	0.375747	0.783708
TCTN3	10	FALSE	NA		-0.0398829	0.0291645	0.4583		-0.0318561	0.0585788	0.423272		0.013332	0.514686	0.852859
C14orf119	14	FALSE	NA		-0.0356808	0.02918	0.4583		-0.0390982	0.0128581	0.251612		0.00751666	0.695235	0.921009
ZNF169	9	FALSE	NA		0.0889035	0.0293016	0.459834		0.0762749	0.0461112	0.38801		-0.112233	0.0150107	0.353663
LSM11	5	FALSE	NA		0.0720374	0.0294975	0.461997		0.096772	0.00231582	0.126526		-0.0356912	0.351018	0.769982
CDX2	13	FALSE	NA		-0.175437	0.0294998	0.461997		-0.125372	0.133006	0.552238		0.11754	0.237852	0.689554
TCAIM	3	FALSE	NA		-0.0499701	0.0295117	0.461997		-0.0197274	0.376014	0.74739		0.0329523	0.212533	0.667622
ULBP3	6	FALSE	NA		-0.175359	0.0295882	0.462396		-0.100924	0.172012	0.589879		-0.00325387	0.970267	0.993043
ZNF764	16	FALSE	NA		0.0696303	0.0295915	0.462396		0.0386515	0.209632	0.621394		0.0177777	0.65026	0.907644
GCHFR	15	FALSE	NA		-0.183878	0.0296438	0.462396		0.0286443	0.756406	0.929489		0.242688	0.020735	0.386429
DSG4	18	FALSE	NA		-0.0640528	0.0296604	0.462396		-0.00358924	0.892374	0.971725		0.0866036	0.00959484	0.315337
FAM110A	20	FALSE	NA		0.0948312	0.0296759	0.462396		0.0107899	0.781449	0.937963		-0.0757715	0.143928	0.606612
SLC25A21	14	FALSE	NA		-0.199251	0.0296851	0.462396		-0.0529755	0.530993	0.837236		0.24219	0.0199212	0.384158
HSP90AA1	14	FALSE	NA		-0.0275473	0.0297326	0.462396		-0.0119792	0.367008	0.741183		0.0416684	0.0113093	0.324667
COX5B	2	FALSE	NA		-0.0350855	0.0297498	0.462396		-0.0340911	0.021333	0.295808		0.0283869	0.118902	0.578013
UQCRQ	5	FALSE	NA		-0.0337823	0.0297969	0.462396		-0.00131005	0.930343	0.981825		0.0525551	0.00466613	0.255721
SULT6B1	2	FALSE	NA		-0.0318409	0.0298544	0.462396		-0.0367699	0.0497797	0.400094		0.0356258	0.123255	0.583004
RAB8A	19	FALSE	NA		-0.0311336	0.0298546	0.462396		-0.0118914	0.401805	0.765415		0.0337624	0.0499859	0.486372
ZNF23	16	FALSE	NA		-0.0622288	0.0298618	0.462396		0.033567	0.227649	0.638678		0.0703862	0.033849	0.443693
MAP2K7	19	FALSE	NA		0.0416769	0.0298677	0.462396		-0.00555875	0.753933	0.928887		-0.0615449	0.00476052	0.255721
GYPE	4	FALSE	NA		-0.121249	0.0299073	0.462396		-0.0814938	0.0730739	0.456706		0.0955797	0.0999268	0.563381
TMEM9	1	FALSE	NA		-0.03934	0.0299363	0.462396		-0.00370826	0.832533	0.954931		0.0456097	0.035525	0.451445
C15orf61	15	FALSE	NA		0.0869388	0.0299463	0.462396		0.0414596	0.257851	0.6643		-0.00852913	0.852644	0.964676
WNT10B	12	FALSE	NA		0.193135	0.0299775	0.462396		-0.0517902	0.545693	0.8457		-0.242538	0.0207074	0.386429
C17orf80	17	FALSE	NA		0.0382312	0.0300187	0.462396		-0.00201899	0.901798	0.974181		-0.0321859	0.109686	0.57354
KYAT3	1	FALSE	NA		-0.0558724	0.0300268	0.462396		-0.00367891	0.884427	0.969529		0.0319379	0.282264	0.722596
PADI6	1	FALSE	NA		-0.0316202	0.0300429	0.462396		-0.0124689	0.326711	0.714098		0.0391093	0.0133319	0.34027
NR5A2	1	FALSE	NA		-0.170402	0.0300436	0.462396		-0.104531	0.20423	0.616037		0.0212905	0.841706	0.961448
COMMD4	15	FALSE	NA		-0.0318576	0.0301019	0.462634		-0.0210948	0.115359	0.527405		0.0287088	0.0872651	0.548503
POMT1	9	FALSE	NA		0.0623289	0.030111	0.462634		0.0300702	0.241258	0.651085		-0.0262591	0.428599	0.813677
EME1	17	FALSE	NA		0.0673009	0.0301438	0.462634		0.0237797	0.391052	0.757572		-0.0428643	0.217157	0.671823
CHGB	20	FALSE	NA		0.232436	0.0301638	0.462634		-0.0391984	0.699285	0.908981		-0.0724338	0.537936	0.865073
MTARC2	1	FALSE	NA		-0.229765	0.0302002	0.462634		0.00747763	0.942435	0.984791		-0.00988479	0.932862	0.985888
CDH17	8	FALSE	NA		-0.173152	0.0302038	0.462634		-0.00475038	0.951154	0.98776		0.194372	0.0507099	0.48966
LAYN	11	FALSE	NA		0.210641	0.0302426	0.462828		0.193862	0.0623614	0.431464		-0.0128369	0.915889	0.982183
HDAC1	1	FALSE	NA		-0.0322545	0.0302647	0.462828		-0.0469505	0.00045624	0.0587203		0.00661648	0.685796	0.917793
PECAM1	17	FALSE	NA		-0.162924	0.0303734	0.46412		-0.0174971	0.787341	0.93914		0.184605	0.0298385	0.429012
PRSS23	11	FALSE	NA		-0.165182	0.0304388	0.46438		-0.179207	0.00409257	0.157914		-0.0353915	0.648052	0.907131
APOH	17	FALSE	NA		-0.125925	0.0304412	0.46438		0.0614847	0.19371	0.607596		0.220788	0.000193139	0.0607184
GPC2	7	FALSE	NA		0.150528	0.0304631	0.46438		0.201608	0.00733203	0.200494		0.0764208	0.396778	0.79677
DNAJA2	16	FALSE	NA		-0.0301901	0.0305149	0.464801		-0.00832472	0.531876	0.837404		0.0247979	0.12981	0.591548
MTSS1	8	FALSE	NA		0.215231	0.0305526	0.464868		0.04532	0.604662	0.871189		-0.117212	0.317275	0.745178
DSTN	20	FALSE	NA		-0.0403692	0.0305678	0.464868		-0.0144644	0.397271	0.762305		0.0434543	0.0415664	0.472473
IFT20	17	FALSE	NA		-0.0362803	0.0306188	0.46519		-0.0251562	0.132124	0.551052		0.0367714	0.075351	0.53282
NAE1	16	FALSE	NA		-0.0324429	0.0306375	0.46519		0.0106619	0.461094	0.8		0.0544623	0.00228212	0.206636
MYT1	20	FALSE	NA		0.154445	0.0306996	0.465635		0.126855	0.0619659	0.431073		0.00282475	0.970819	0.993043
ITFG2	12	FALSE	NA		0.0448414	0.0307153	0.465635		0.00670185	0.726296	0.918684		-0.0187436	0.438422	0.817463
PCDH8	13	FALSE	NA		0.134617	0.0308149	0.466775		0.102802	0.074412	0.458695		-0.098871	0.131585	0.593045
CYP27A1	2	FALSE	NA		0.22913	0.0308993	0.467386		0.17773	0.0735632	0.457882		-0.247748	0.0356817	0.451445
MOCOS	18	FALSE	NA		-0.173623	0.0309401	0.467386		0.0250114	0.750094	0.92701		0.0640127	0.483425	0.838205
S100A6	1	FALSE	NA		-0.117147	0.0309427	0.467386		-0.0198986	0.6822	0.902671		0.108068	0.0615085	0.507688
LSMEM1	7	FALSE	NA		0.129954	0.0309527	0.467386		0.0647623	0.244153	0.65361		0.0131045	0.852444	0.964676
MLN	6	FALSE	NA		-0.0444404	0.0310843	0.468908		-0.0269858	0.150586	0.572776		0.0398401	0.090757	0.550984
TRIM43B	2	FALSE	NA		-0.0521834	0.0311024	0.468908		0.0016624	0.935691	0.982634		0.043133	0.100908	0.564929
SMIM9	X	FALSE	NA		-0.029574	0.0311434	0.469156		-0.0193104	0.130808	0.549507		0.0189697	0.231008	0.684041
CPA6	8	FALSE	NA		-0.155134	0.0312279	0.469793		-0.151709	0.0361429	0.35477		0.101579	0.236925	0.688771
MOB2	11	FALSE	NA		-0.0368635	0.0312346	0.469793		0.00937607	0.587915	0.863312		0.0102862	0.6207	0.89612
SDHC	1	FALSE	NA		-0.0315044	0.0312689	0.46994		-0.0219232	0.118505	0.531845		0.0321111	0.0628986	0.510239
PSMA4	15	FALSE	NA		-0.0253158	0.0314115	0.471713		-0.0170357	0.130762	0.549435		0.0238841	0.0854272	0.547339
CNGA1	4	FALSE	NA		-0.152789	0.0314994	0.472664		0.00625423	0.930087	0.981687		0.194019	0.0202174	0.384893
PER3	1	FALSE	NA		0.148905	0.0315586	0.473181		0.0209835	0.737228	0.922413		-0.0880804	0.276097	0.718902
ATXN7L2	1	FALSE	NA		0.0729463	0.0316102	0.473585		0.0123695	0.719374	0.916579		-0.058343	0.161734	0.622851
OXT	20	FALSE	NA		-0.0710839	0.0318138	0.476105		-0.0110863	0.702172	0.910025		0.0794098	0.0307252	0.430388
EFTUD2	17	FALSE	NA		0.0254919	0.0318933	0.476105		0.0102158	0.369303	0.742849		-0.0169014	0.227691	0.680215
PANK4	1	FALSE	NA		0.0465163	0.0319996	0.476105		0.0311174	0.115789	0.527405		-0.0283409	0.24244	0.694105
ANO10	3	FALSE	NA		-0.0734107	0.0320031	0.476105		-0.0631973	0.0436249	0.379529		0.0612268	0.0998894	0.563381
PRNP	20	FALSE	NA		-0.0769689	0.0320492	0.476105		0.0231399	0.526101	0.833461		0.0239138	0.579229	0.881267
BLOC1S2	10	FALSE	NA		-0.0384532	0.0320555	0.476105		-0.0399896	0.0172307	0.271738		0.0518059	0.01282	0.33675
TCEAL4	X	FALSE	Inactive		-0.0667058	0.0320697	0.476105		-0.00243464	0.943732	0.984857		0.0411255	0.297459	0.731993
FSHR	2	FALSE	NA		-0.0397241	0.0320859	0.476105		-0.00486507	0.772403	0.934975		0.0382861	0.0683991	0.519715
BAK1	6	FALSE	NA		-0.0424149	0.0320859	0.476105		-0.00201078	0.914566	0.978456		0.0334406	0.143196	0.606612
PHF8	X	FALSE	Inactive		0.0448255	0.0320885	0.476105		0.058252	0.00800523	0.210585		-0.0188614	0.477249	0.835818
ARIH1	15	FALSE	NA		0.0296933	0.0320897	0.476105		0.0253647	0.046401	0.389083		0.00798418	0.617744	0.894817
SYPL1	7	FALSE	NA		-0.0441	0.0320954	0.476105		-0.0194561	0.330831	0.715681		0.0454301	0.0650436	0.512308
SMAD9	13	FALSE	NA		0.155428	0.0321436	0.476105		0.215478	0.00380933	0.153156		0.162743	0.0678196	0.517952
SP100	2	FALSE	NA		-0.128505	0.0322623	0.476105		-0.150883	0.00605658	0.18436		-0.0274956	0.661726	0.910453
ADGRV1	5	FALSE	NA		-0.21604	0.0323032	0.476105		-0.171632	0.0828764	0.47613		0.226107	0.0734083	0.528242
CRYL1	13	FALSE	NA		-0.120925	0.0323034	0.476105		0.0543745	0.349264	0.728686		0.148274	0.0230031	0.398428
ME1	6	FALSE	NA		-0.199899	0.0323037	0.476105		-0.223491	0.0155938	0.266953		0.0588281	0.58955	0.885096
RIMKLB	12	FALSE	NA		0.210108	0.0323245	0.476105		-0.0336612	0.667957	0.89736		-0.277456	0.0102129	0.317903
FIBIN	11	FALSE	NA		-0.123659	0.0323299	0.476105		-0.0928346	0.0673948	0.443361		0.0326413	0.634294	0.901909
PNMA8A	19	FALSE	NA		0.224259	0.0323422	0.476105		0.208196	0.0302336	0.33595		-0.00637019	0.951501	0.990734
ENTPD3	3	FALSE	NA		-0.156926	0.0323433	0.476105		-0.0539604	0.441025	0.787458		0.140898	0.0961559	0.55567
MAOB	X	FALSE	Inactive		-0.198636	0.0323531	0.476105		-0.145547	0.110627	0.520907		0.166351	0.145588	0.607057
SLC16A2	X	FALSE	Inactive		-0.171244	0.0324031	0.476105		0.0368941	0.678061	0.901059		0.0237172	0.803045	0.950052
PPIC	5	FALSE	NA		-0.122601	0.0324043	0.476105		-0.0974514	0.0598136	0.428016		-0.0170498	0.776149	0.942636
HLA.E	6	FALSE	Inactive		-0.0992608	0.0324129	0.476105		-0.0615736	0.128288	0.546405		0.0127333	0.788536	0.946412
FAM234B	12	FALSE	NA		0.114229	0.0324556	0.476105		-0.0497455	0.267098	0.670412		-0.15501	0.00686473	0.284071
COMMD3.BMI1	10	FALSE	NA		-0.0873974	0.0325008	0.476105		-0.0909206	0.00928631	0.223442		-0.0192696	0.626438	0.898691
IRAK2	3	FALSE	NA		-0.184838	0.0325112	0.476105		-0.121265	0.118201	0.53156		-0.0423734	0.638148	0.903195
LCN6	9	FALSE	NA		-0.0862492	0.0325207	0.476105		-0.0362369	0.225454	0.635826		0.0564053	0.157099	0.616684
ZNF596	8	FALSE	NA		0.1142	0.032549	0.476105		0.18765	0.000482951	0.0609312		0.0298102	0.650411	0.907644
HSF4	16	FALSE	NA		0.0986481	0.0325518	0.476105		0.031272	0.448066	0.790848		-0.0736953	0.174519	0.635179
PRSS21	16	FALSE	NA		-0.245324	0.0325728	0.476105		-0.472246	0.000219445	0.0380512		-0.00261167	0.986316	0.99688
FBXO43	8	FALSE	NA		0.163228	0.0326189	0.476415		0.0486007	0.52182	0.831487		-0.121745	0.18711	0.646068
THRB	3	FALSE	NA		-0.202179	0.0326588	0.476634		-0.174463	0.0543096	0.412473		0.107107	0.339393	0.761144
APOOL	X	FALSE	Inactive		-0.0808576	0.0327118	0.477045		0.0195528	0.620491	0.878537		-0.00347277	0.938381	0.987901
ADRA1D	20	FALSE	NA		-0.125099	0.03276	0.477277		-0.0530055	0.356199	0.73325		-0.0564424	0.465748	0.829823
BCL2L12	19	FALSE	NA		-0.0577309	0.0327775	0.477277		-0.0757979	0.00155418	0.107987		0.010096	0.723097	0.929722
PNMA6A	X	FALSE	Inactive		0.185793	0.0328706	0.477997		-0.0384956	0.685033	0.903624		0.0876756	0.377453	0.784566
FLNB	3	FALSE	NA		-0.0650723	0.0328768	0.477997		0.0222816	0.420737	0.77661		0.0998259	0.00418179	0.25315
TPM1	15	FALSE	NA		-0.0769928	0.0329559	0.478782		0.000174385	0.995771	0.998959		0.0511199	0.210878	0.666014
SSBP1	7	FALSE	NA		-0.0324683	0.0329807	0.478782		-0.0185735	0.212739	0.624477		0.0412608	0.0244264	0.405213
HOOK2	19	FALSE	NA		0.0656215	0.0330922	0.479959		-0.00133352	0.963313	0.991244		-0.0851967	0.0212547	0.391941
FAH	15	FALSE	NA		-0.0831361	0.0331118	0.479959		-0.0410901	0.247714	0.656244		0.0483685	0.24605	0.696729
CEMP1	16	FALSE	NA		0.153846	0.033189	0.480263		0.0687034	0.263132	0.667692		-0.0775069	0.32901	0.753019
TBC1D23	3	FALSE	NA		-0.0487304	0.0332014	0.480263		-0.0117632	0.594321	0.867392		0.016416	0.535487	0.86396
SHPRH	6	FALSE	NA		0.0870022	0.0332079	0.480263		0.0389759	0.280712	0.679333		-0.0751341	0.0878046	0.549488
EPAS1	2	FALSE	NA		-0.166671	0.033243	0.480271		-0.0834459	0.230658	0.641992		-0.0335095	0.693101	0.920738
SF3B6	2	FALSE	NA		-0.0324478	0.0332586	0.480271		-0.0494961	0.000689381	0.0688555		0.00358313	0.8398	0.961034
SLC52A3	20	FALSE	NA		-0.152687	0.0333099	0.480535		-0.100398	0.195115	0.609356		0.0627847	0.493384	0.841655
CGB8	19	FALSE	NA		-0.177686	0.0333725	0.480535		-0.215445	0.0180409	0.276345		0.06893	0.512162	0.851569
TMEM106A	17	FALSE	NA		0.170191	0.0333943	0.480535		0.0447187	0.562817	0.853171		-0.231676	0.0134674	0.340288
TWF1	12	FALSE	NA		-0.0381294	0.0333975	0.480535		-0.0110616	0.634223	0.883675		0.051007	0.0780736	0.537022
FAM183A	1	FALSE	NA		-0.135791	0.0334158	0.480535		-0.0917458	0.172861	0.590245		0.0605863	0.44637	0.821189
EXOC7	17	FALSE	NA		0.0287802	0.0334272	0.480535		0.0234993	0.0732378	0.457039		-0.0117977	0.474446	0.834178
LCE3D	1	FALSE	NA		-0.0963235	0.0334524	0.480537		-0.0718658	0.0962251	0.496966		0.083418	0.106933	0.57175
SSPN	12	FALSE	NA		-0.183737	0.0335367	0.481362		-0.0953148	0.266859	0.670187		-0.0574452	0.583383	0.883184
AKAP8L	19	FALSE	NA		0.0305421	0.0335709	0.481362		0.00101446	0.937534	0.982786		-0.0173681	0.276569	0.71898
NDUFB6	9	FALSE	NA		-0.0339571	0.0335948	0.481362		-0.0209163	0.165132	0.584269		0.00760461	0.679962	0.916284
GPR162	12	FALSE	NA		0.171494	0.0336102	0.481362		0.0113431	0.895908	0.972713		-0.137738	0.175828	0.636693
GRAP2	22	FALSE	NA		0.129193	0.0336364	0.481377		-0.0298076	0.635345	0.883848		-0.0873141	0.213373	0.668775
CXCR3	X	FALSE	Inactive		-0.097033	0.0337178	0.482182		0.00508319	0.895665	0.972713		0.127023	0.016516	0.360392
SHF	15	FALSE	NA		0.160502	0.0337934	0.482404		0.0224922	0.760222	0.930956		0.0080426	0.931931	0.985888
RPL39	X	FALSE	Inactive		-0.0369187	0.0338147	0.482404		-0.0183119	0.262685	0.667308		0.0368043	0.0644864	0.511438
IFIT3	10	FALSE	NA		-0.199066	0.0338329	0.482404		-0.060208	0.494767	0.817231		-0.11647	0.252351	0.701213
CT47B1	X	FALSE	NA		-0.0326679	0.0338364	0.482404		-0.0229856	0.188583	0.604323		0.00583062	0.790373	0.947268
CRHR1	17	FALSE	NA		0.0870556	0.033892	0.482404		0.0564161	0.185201	0.600513		-0.0364498	0.456533	0.826153
PRDX1	1	FALSE	NA		-0.0379037	0.0338963	0.482404		-0.0462397	0.00558861	0.177145		0.0342614	0.102801	0.566099
OOEP	6	FALSE	NA		0.144766	0.0339317	0.482404		-0.131247	0.105031	0.512327		-0.0896965	0.301018	0.73415
HGS	17	FALSE	NA		0.0279675	0.0339345	0.482404		0.0205658	0.100672	0.503675		0.00105744	0.94718	0.990607
RBM18	9	FALSE	NA		0.0423106	0.0340023	0.482499		0.0199439	0.266033	0.669491		-0.0279633	0.211479	0.666601
EIF4E	4	FALSE	NA		-0.0332768	0.0340165	0.482499		-0.00633486	0.666293	0.896234		0.0295452	0.0952265	0.554643
LARP6	15	FALSE	NA		-0.104309	0.0340582	0.482499		-0.0162364	0.754942	0.929178		0.0888091	0.186839	0.645958
SLC2A10	20	FALSE	NA		-0.21483	0.0340752	0.482499		-0.142461	0.172467	0.590115		0.138923	0.264955	0.710534
RRAGD	6	FALSE	NA		0.239174	0.0340824	0.482499		-0.00574332	0.955645	0.989636		-0.206772	0.100604	0.564282
SLC16A5	17	FALSE	NA		-0.190552	0.0341686	0.482499		-0.145668	0.103319	0.508249		-0.00306818	0.975361	0.993705
TKTL2	4	FALSE	NA		-0.0375232	0.0341691	0.482499		-0.00722891	0.621532	0.878941		0.048205	0.00822382	0.304887
TP53BP1	15	FALSE	NA		0.0400452	0.0341884	0.482499		-0.0358427	0.0402037	0.368894		-0.0512403	0.0199965	0.384158
NES	1	FALSE	NA		0.238009	0.0342012	0.482499		0.345774	0.00271895	0.136739		-0.295012	0.0205935	0.386429
SEC23IP	10	FALSE	NA		-0.037544	0.0342316	0.482499		-0.0224401	0.158539	0.57794		0.0221741	0.257354	0.704649
LTBP1	2	FALSE	NA		-0.167645	0.0342368	0.482499		0.0141782	0.872866	0.966887		0.195266	0.0522827	0.496349
JUP	17	FALSE	NA		-0.13418	0.0342517	0.482499		-0.0726628	0.238215	0.648072		0.031536	0.665911	0.912209
GRIK2	6	FALSE	NA		0.148008	0.034291	0.482499		-0.0508324	0.523226	0.831861		-0.247491	0.00655066	0.277349
PDZD4	X	FALSE	Inactive		0.164492	0.0342956	0.482499		0.148365	0.0854715	0.482085		0.0418499	0.669397	0.913039
TDRD12	19	FALSE	NA		-0.130692	0.0343517	0.482499		-0.0562394	0.338121	0.721145		0.143896	0.0575092	0.500279
RNF128	X	FALSE	NA		-0.206088	0.0343585	0.482499		-0.0170764	0.870126	0.96604		0.313917	0.0142774	0.350125
PF4V1	4	FALSE	NA		-0.0864525	0.0343689	0.482499		-0.156062	0.00077951	0.0744339		0.0592942	0.280926	0.722138
RABGAP1	9	FALSE	NA		0.0389516	0.0343951	0.482513		0.0412216	0.0181371	0.276823		-0.0360053	0.0926403	0.551429
RFX7	15	FALSE	NA		0.0650612	0.0344643	0.482547		0.0107722	0.715988	0.915597		-0.0359246	0.329448	0.753315
SULT2B1	19	FALSE	NA		-0.190932	0.0344663	0.482547		-0.0599849	0.496028	0.817533		0.188282	0.0827314	0.544642
RARS1	5	FALSE	NA		-0.0294054	0.0344799	0.482547		-0.0382068	0.002704	0.136459		0.018372	0.246685	0.697227
IPMK	10	FALSE	NA		-0.0761689	0.0344982	0.482547		-0.0267903	0.430425	0.780988		0.0172504	0.674782	0.914845
DNAJC8	1	FALSE	NA		-0.0300025	0.0346091	0.482855		-0.022136	0.0874203	0.484531		0.016333	0.295864	0.731163
RTEL1	20	FALSE	NA		0.0618818	0.0346672	0.482855		0.0626121	0.0407898	0.370197		-0.00373287	0.92391	0.983886
ZNF33A	10	FALSE	NA		-0.0510513	0.0346823	0.482855		0.0305226	0.236387	0.647568		0.0659266	0.0313544	0.431788
PPIH	1	FALSE	NA		-0.0357715	0.03472	0.482855		-0.0167846	0.290569	0.68716		0.0269331	0.162742	0.623932
CCNDBP1	15	FALSE	NA		-0.0402571	0.0347302	0.482855		-0.0452127	0.0136899	0.25789		0.0136105	0.541834	0.867125
HCST	19	FALSE	NA		0.185214	0.0347392	0.482855		0.180801	0.0312532	0.339571		0.210562	0.0303835	0.429327
STK3	8	FALSE	NA		-0.0562849	0.0348114	0.482855		-0.0388187	0.131561	0.550376		-0.0184659	0.541388	0.867047
HMG20A	15	FALSE	NA		0.0366047	0.0348446	0.482855		0.0149265	0.374184	0.745808		-0.0188035	0.355842	0.771246
FAM71E2	19	FALSE	NA		-0.0276986	0.0348674	0.482855		-0.0134417	0.311805	0.703551		0.00211324	0.898714	0.976134
NUP37	12	FALSE	NA		-0.0393267	0.0349203	0.482855		-0.0627569	0.000319896	0.0475554		-0.00134427	0.949951	0.990734
EFNA4	1	FALSE	NA		-0.0878077	0.0349398	0.482855		-0.030456	0.471715	0.806514		0.103433	0.0434127	0.477075
ZNHIT6	1	FALSE	NA		-0.0410825	0.0349614	0.482855		-0.0212216	0.255642	0.662312		0.00011746	0.995836	0.999055
PCDHA9	5	FALSE	NA		0.0548273	0.0349699	0.482855		0.0205811	0.414295	0.773004		-0.0372277	0.219744	0.673782
LIN7A	12	FALSE	NA		0.206452	0.0349753	0.482855		0.0523742	0.606646	0.872023		-0.0147954	0.893847	0.974206
RNPEP	1	FALSE	NA		-0.0463725	0.0350034	0.482855		-0.00462139	0.806898	0.946759		0.0656595	0.00500697	0.257016
KRT33A	17	FALSE	NA		-0.0441336	0.0350456	0.482855		-0.0401999	0.0798303	0.468597		0.0374786	0.177971	0.638705
UNC5A	5	FALSE	NA		0.144845	0.0350496	0.482855		0.146291	0.0424465	0.376851		0.00962579	0.906424	0.979207
DUS2	16	FALSE	NA		-0.0446634	0.0350997	0.482855		-0.0414636	0.0418958	0.373804		0.0277301	0.266025	0.711088
MCU	10	FALSE	NA		-0.0498756	0.0351261	0.482855		-0.0147311	0.499558	0.81895		0.00629711	0.813134	0.952219
MT1HL1	1	FALSE	NA		-0.0348593	0.0351624	0.482855		-0.0305959	0.0790003	0.467888		0.0413892	0.054542	0.497125
DTX3	12	FALSE	NA		0.168244	0.0351751	0.482855		0.204898	0.0169316	0.270605		-0.169238	0.117339	0.577354
CLCN6	1	FALSE	NA		0.0623216	0.0351856	0.482855		-0.0107274	0.684925	0.903614		-0.122552	0.000143427	0.0482542
EPHA8	1	FALSE	NA		0.111591	0.035219	0.482855		-0.0202108	0.723658	0.917993		-0.043539	0.492455	0.84162
CLMP	11	FALSE	NA		-0.191885	0.0352363	0.482855		0.0341165	0.743836	0.92454		0.164129	0.150137	0.610075
ATP6AP2	X	FALSE	Inactive		-0.0351059	0.0352898	0.482855		0.00592844	0.706456	0.911609		0.0419258	0.0294447	0.429012
ATP1B4	X	FALSE	Inactive		-0.0475728	0.0353196	0.482855		-0.0203192	0.252017	0.659807		0.0372198	0.094161	0.553183
AP002495.1	NA	FALSE	NA		0.0814945	0.0353198	0.482855		0.0289064	0.426695	0.779159		-0.0910092	0.0442812	0.480306
IGSF23	19	FALSE	NA		-0.087452	0.0353395	0.482855		-0.0114708	0.777789	0.936312		0.121355	0.011524	0.326115
KIF1C	17	FALSE	NA		-0.0619231	0.0353889	0.482855		-0.0185799	0.472933	0.806795		0.0196315	0.534847	0.863576
SECTM1	17	FALSE	NA		-0.231607	0.0353997	0.482855		-0.00387367	0.969603	0.992787		-0.0426147	0.736738	0.932289
ATXN3L	X	FALSE	Variable		-0.0514401	0.0354261	0.482855		-0.00892496	0.701143	0.909792		0.0551193	0.0594423	0.502802
KLRF2	12	FALSE	NA		-0.0648009	0.035473	0.482855		-0.0166026	0.487398	0.813862		0.0776693	0.0111514	0.324667
SRP54	14	FALSE	NA		-0.0255555	0.0354949	0.482855		-0.0296964	0.0141239	0.260238		0.0184283	0.21626	0.671128
DAP	5	FALSE	NA		-0.0395077	0.0355135	0.482855		-0.0249011	0.166733	0.585586		-0.0108913	0.617669	0.894817
NDUFC1	4	FALSE	NA		-0.0393528	0.0355583	0.482855		-0.0231146	0.192244	0.607423		0.0722216	0.00108024	0.15121
SAXO1	9	FALSE	NA		-0.0428025	0.0356324	0.482855		-0.0373165	0.0559042	0.415928		0.0364941	0.130379	0.592128
DDX55	12	FALSE	NA		0.037203	0.0356556	0.482855		-0.0350205	0.0256428	0.314763		-0.0475564	0.0153058	0.354063
TLNRD1	15	FALSE	NA		0.0921763	0.0356742	0.482855		0.0156602	0.676434	0.900334		-0.0726877	0.131636	0.593117
CACNB2	10	FALSE	NA		0.143144	0.0356858	0.482855		0.138203	0.0235421	0.304435		-0.0400572	0.588602	0.884472
RLN2	9	FALSE	NA		-0.184347	0.035702	0.482855		-0.126374	0.170357	0.58853		0.111941	0.323081	0.748443
CNN2	19	FALSE	NA		-0.0934979	0.0357759	0.482855		-0.0611075	0.108686	0.518603		0.0406758	0.373448	0.782058
SLC25A22	11	FALSE	NA		0.049008	0.035776	0.482855		0.0159329	0.469426	0.804954		-0.0424919	0.128167	0.58995
CFAP61	20	FALSE	NA		0.126464	0.0357777	0.482855		0.0979401	0.0892208	0.487364		-0.0144443	0.826113	0.956291
CST6	11	FALSE	NA		-0.199082	0.035797	0.482855		-0.0245579	0.806528	0.94673		-0.0491548	0.702295	0.923541
ARFGEF1	8	FALSE	NA		-0.0428171	0.0358313	0.482855		-0.0364345	0.0625955	0.431962		0.00900034	0.704701	0.923541
BLZF1	1	FALSE	NA		-0.0486711	0.035879	0.482855		-0.0223357	0.290602	0.68716		0.0182203	0.480281	0.83685
AP2M1	3	FALSE	NA		-0.0247301	0.0358949	0.482855		-0.0341373	0.00296771	0.139508		0.0107408	0.448519	0.822063
PTGER4	5	FALSE	NA		-0.215848	0.0359318	0.482855		-0.176835	0.0667224	0.442333		-0.0320635	0.779742	0.943891
ZNF726	19	FALSE	NA		0.229001	0.0359711	0.482855		0.138196	0.186791	0.601933		-0.0886658	0.492246	0.841606
FADS1	11	FALSE	NA		0.0882166	0.0359894	0.482855		-0.0128001	0.757306	0.929815		-0.0788226	0.134018	0.59505
EMC8	16	FALSE	NA		-0.0316531	0.0359994	0.482855		-0.0220645	0.14257	0.562985		0.0368879	0.0501817	0.487504
CORO7	16	FALSE	NA		0.0577293	0.0360385	0.482855		0.0898436	0.000862566	0.0790003		-0.0257084	0.42483	0.811872
TXNL1	18	FALSE	NA		-0.0367441	0.0360438	0.482855		-0.00967829	0.574986	0.857567		0.0755612	0.000381962	0.0883874
TNFRSF1A	12	FALSE	NA		-0.103704	0.0360514	0.482855		-0.102882	0.0129191	0.252291		0.0183147	0.713294	0.925678
ANKRD18A	9	FALSE	NA		0.20772	0.0361033	0.482855		0.166414	0.0765807	0.463552		-0.188894	0.10827	0.571931
HOXB8	17	FALSE	NA		-0.214119	0.036106	0.482855		-0.26854	0.00958558	0.227267		0.0765104	0.538464	0.865457
KMT2C	7	FALSE	NA		0.0541557	0.0361138	0.482855		0.0169967	0.473155	0.806795		-0.0139991	0.640471	0.904377
SLC23A2	20	FALSE	NA		0.0633912	0.0361392	0.482855		0.0679493	0.0412548	0.3717		-0.0512915	0.197742	0.654825
MLST8	16	FALSE	NA		0.0320148	0.0361803	0.482855		0.0127535	0.387231	0.755724		-0.00962593	0.598967	0.888445
COX14	12	FALSE	NA		-0.0357864	0.0361829	0.482855		-0.0267508	0.0931668	0.492557		0.0334904	0.0861795	0.547666
LHX4	1	FALSE	NA		0.132082	0.0362053	0.482855		0.134125	0.0223099	0.300136		-0.118396	0.104881	0.568886
AKAP9	7	FALSE	NA		0.0488279	0.0362259	0.482855		0.00215705	0.922937	0.980494		-0.0593927	0.0350166	0.450378
S100A13	1	FALSE	NA		-0.0770276	0.0362408	0.482855		-0.069041	0.0359798	0.354534		0.0179168	0.646514	0.906633
ZNF416	19	FALSE	NA		-0.0955785	0.0362616	0.482855		0.00406418	0.92252	0.980494		0.120646	0.0184069	0.374352
EXTL3	8	FALSE	NA		0.0591988	0.0362634	0.482855		0.0273654	0.28499	0.682414		-0.08387	0.00802716	0.303991
SAFB2	19	FALSE	NA		0.036682	0.0362675	0.482855		-0.023445	0.138186	0.556791		-0.0225413	0.257283	0.704649
PIK3CB	3	FALSE	NA		-0.051503	0.0362709	0.482855		-0.0533455	0.017795	0.275428		0.00150374	0.956367	0.990858
ITPR1	3	FALSE	NA		0.127383	0.036281	0.482855		-0.0850469	0.151632	0.572991		-0.111219	0.126415	0.587335
CEACAM18	19	FALSE	NA		-0.0426742	0.036285	0.482855		-0.0125247	0.494109	0.817091		0.0674026	0.00342396	0.24156
BLOC1S1	12	FALSE	NA		-0.0375112	0.0362992	0.482855		0.00315423	0.889994	0.971439		0.0428237	0.124934	0.584908
ULK3	15	FALSE	NA		0.0507464	0.0363079	0.482855		0.00358953	0.870379	0.966153		-0.0290257	0.289862	0.727292
TIMP1	X	FALSE	Variable		-0.120732	0.0363813	0.483496		-0.0790151	0.1531	0.574559		0.0850037	0.195989	0.65407
EDAR	2	FALSE	NA		-0.113596	0.0364302	0.483523		-0.0807984	0.152558	0.573646		0.110857	0.10401	0.567203
CCDC151	19	FALSE	NA		0.125914	0.0364434	0.483523		-0.0602945	0.342236	0.72456		-0.0913916	0.225103	0.677653
MSI2	17	FALSE	NA		0.0725226	0.0364742	0.483523		0.0286488	0.351788	0.730192		-0.0624302	0.0969499	0.556938
CHMP4A	14	FALSE	NA		-0.0419467	0.0364842	0.483523		-0.0294213	0.110044	0.520293		0.0458441	0.041673	0.472877
MKRN3	15	FALSE	NA		0.25137	0.0365315	0.483594		0.0733158	0.526951	0.834294		-0.247019	0.0957798	0.555587
CNN1	19	FALSE	NA		-0.210785	0.03654	0.483594		0.0312603	0.726052	0.918546		0.228267	0.0469146	0.483971
IGFL1	19	FALSE	NA		-0.151794	0.0365886	0.483731		-0.120959	0.116032	0.52787		-0.104511	0.295942	0.731163
RIIAD1	1	FALSE	NA		0.101505	0.0366008	0.483731		0.0720435	0.140244	0.560423		-0.0598125	0.293277	0.729345
CASP3	4	FALSE	NA		-0.0458941	0.036629	0.48377		0.0334383	0.113339	0.525556		0.0955357	0.000170681	0.0554771
CCDC88C	14	FALSE	NA		0.113718	0.0366744	0.483856		0.0928742	0.100985	0.504418		0.00565699	0.936794	0.987137
C1orf162	1	FALSE	NA		0.122424	0.0366915	0.483856		0.085661	0.114059	0.526996		-0.0495543	0.446324	0.821189
PSMB10	16	FALSE	NA		-0.0506517	0.0367481	0.483856		0.00504191	0.826145	0.953133		0.0433136	0.116058	0.576364
SV2A	1	FALSE	NA		0.181483	0.0367828	0.483856		0.060694	0.518834	0.82925		-0.254402	0.0194674	0.3829
KLLN	10	FALSE	NA		-0.098953	0.0367956	0.483856		-0.0543831	0.213139	0.624885		0.0577372	0.296871	0.731561
PSME2	14	FALSE	NA		-0.0353622	0.0368067	0.483856		-0.0127303	0.426154	0.778655		0.0285123	0.14568	0.607197
E2F1	20	FALSE	NA		0.0599751	0.0368121	0.483856		0.0418483	0.127924	0.545672		-0.00745945	0.828508	0.957326
PRRT2	16	FALSE	NA		0.158398	0.0369576	0.485435		0.136354	0.0751229	0.461002		-0.103491	0.258217	0.705137
HCN1	5	FALSE	NA		0.104382	0.03704	0.485905		0.0761893	0.0974237	0.498968		-0.0583363	0.301358	0.734511
NQO1	16	FALSE	NA		-0.0851626	0.0370441	0.485905		-0.0844468	0.0293309	0.332393		0.0246075	0.602845	0.890345
SHLD3	5	FALSE	NA		-0.0679105	0.0370972	0.48627		0.0350476	0.265558	0.669023		0.0923365	0.0137525	0.345364
HRH3	20	FALSE	NA		0.0766828	0.0371718	0.486864		0.0648535	0.0674714	0.443361		0.0154821	0.698429	0.92241
TAS2R14	12	FALSE	NA		0.0885435	0.0371933	0.486864		0.0168771	0.680262	0.901796		-0.103394	0.0424921	0.47427
TRIM49	11	FALSE	NA		-0.0585996	0.0372922	0.48741		0.0124687	0.603912	0.870802		0.0310957	0.314197	0.743027
SNX14	6	FALSE	NA		-0.0360382	0.0373366	0.48741		-0.019899	0.232129	0.644068		0.00726987	0.720801	0.928577
DRAP1	11	FALSE	NA		-0.0393371	0.0373414	0.48741		-0.0352615	0.0485328	0.397183		-0.00164167	0.940157	0.987989
FNBP4	11	FALSE	NA		0.030927	0.0373422	0.48741		0.0316019	0.029775	0.333525		-0.0264175	0.13736	0.598265
C5AR2	19	FALSE	NA		-0.0995301	0.037362	0.48741		-0.0635974	0.13794	0.556725		0.0799265	0.132091	0.593537
ATAD1	10	FALSE	NA		-0.0940584	0.0374089	0.487689		-0.032163	0.450351	0.792547		0.0459737	0.369942	0.779749
ADAMTS2	5	FALSE	NA		0.206718	0.0374734	0.487915		0.292886	0.00115143	0.09112		0.0408658	0.704201	0.923541
KPNA5	6	FALSE	NA		0.0854283	0.0374815	0.487915		0.0336476	0.402165	0.765415		-0.0612026	0.213404	0.668775
NEXN	1	FALSE	NA		-0.186903	0.0375111	0.487915		0.0997909	0.305306	0.698886		0.162685	0.147993	0.608655
KLHL32	6	FALSE	NA		0.0968818	0.037528	0.487915		-0.0127197	0.773152	0.935028		-0.0418352	0.41758	0.809454
HSD17B7	1	FALSE	NA		0.0627764	0.0375626	0.488034		0.0429606	0.11565	0.527405		-0.0273194	0.417333	0.809326
OR10Q1	11	FALSE	NA		-0.0392604	0.0376141	0.488069		-0.0101407	0.520378	0.830569		0.0446457	0.0228716	0.398428
KAT6A	8	FALSE	NA		0.0551207	0.0376361	0.488069		0.0360323	0.151625	0.572991		-0.0145424	0.635904	0.902641
CCAR2	8	FALSE	NA		0.0291737	0.0376417	0.488069		0.0189721	0.173649	0.591382		-0.0109664	0.521142	0.855623
CHTF18	16	FALSE	NA		0.0705891	0.0376736	0.488153		0.00398133	0.893993	0.972429		-0.0437487	0.256464	0.704118
PCBD1	10	FALSE	NA		-0.0809685	0.0377091	0.488283		-0.040282	0.238857	0.648546		0.110644	0.0103202	0.319378
TRABD2A	2	FALSE	NA		-0.213738	0.0378069	0.489165		-0.0657084	0.529358	0.836238		0.112342	0.354787	0.771012
DMBT1	10	FALSE	NA		-0.153231	0.0378282	0.489165		-0.0744401	0.269103	0.671478		-0.0603022	0.520908	0.855526
HAAO	2	FALSE	NA		-0.193488	0.0378861	0.489317		-0.100492	0.254281	0.662008		0.123774	0.272803	0.717142
ARRDC5	19	FALSE	NA		-0.0435782	0.037891	0.489317		-0.0300244	0.0870919	0.484531		0.0385017	0.0760896	0.533494
OR2AG2	11	FALSE	NA		-0.0580705	0.0379321	0.489518		-0.0283829	0.270255	0.671561		0.0372243	0.260199	0.706179
GNG10	9	FALSE	NA		-0.0465929	0.038021	0.490052		-0.0034596	0.88664	0.970275		0.0317483	0.282198	0.722525
HCN3	1	FALSE	NA		0.105518	0.0380246	0.490052		0.0851489	0.068156	0.444719		0.00497697	0.934169	0.986376
MAIP1	2	FALSE	NA		-0.0327442	0.0380706	0.490306		-0.0370209	0.0187754	0.281797		0.00330273	0.863038	0.967331
TTC34	1	FALSE	NA		0.0575804	0.0380954	0.490306		0.043396	0.118327	0.531831		0.000396652	0.990426	0.998268
RBM20	10	FALSE	NA		0.168342	0.0381941	0.4909		-0.184256	0.0362846	0.354835		-0.248309	0.0126221	0.33675
TMEM259	19	FALSE	NA		0.0331254	0.0381952	0.4909		0.00424318	0.766968	0.933165		-0.0150251	0.402187	0.799024
PNLIP	10	FALSE	NA		-0.0402523	0.0383107	0.4909		-0.0205628	0.246911	0.65567		0.0282618	0.203323	0.65975
TEX19	17	FALSE	NA		0.183487	0.0383383	0.4909		0.179956	0.0235316	0.304435		0.0262495	0.77877	0.943608
LRRC26	9	FALSE	NA		0.118598	0.03836	0.4909		0.100423	0.078813	0.467888		-0.0543622	0.400041	0.798687
FARP1	13	FALSE	NA		0.108474	0.0383657	0.4909		0.0934	0.0722035	0.454132		-0.0510728	0.412298	0.805592
TXNDC9	2	FALSE	NA		-0.0351169	0.0383666	0.4909		-0.0397231	0.0165088	0.269043		0.0037299	0.854562	0.965245
ANKRD61	7	FALSE	NA		0.11275	0.0384091	0.4909		0.101825	0.0468913	0.390971		-0.162241	0.0105897	0.320515
GPR137B	1	FALSE	NA		0.15084	0.0384181	0.4909		0.107422	0.141935	0.562438		-0.0867177	0.309035	0.739084
WFDC13	20	FALSE	NA		-0.0572246	0.038425	0.4909		-0.01487	0.5383	0.841525		0.0715875	0.0193639	0.382756
TBX19	1	FALSE	NA		0.105151	0.0385352	0.4909		0.0244667	0.601028	0.87022		-0.0302925	0.608381	0.891421
UFC1	1	FALSE	NA		-0.0327479	0.0385424	0.4909		-0.0204541	0.176659	0.593933		0.0395728	0.0320243	0.433097
PRPF18	10	FALSE	NA		-0.0393773	0.0385648	0.4909		-0.0404955	0.028272	0.328123		-0.00183576	0.933921	0.986277
KRT28	17	FALSE	NA		-0.0340101	0.03869	0.4909		-0.0169491	0.23001	0.641246		0.0299959	0.0878724	0.549592
RSKR	17	FALSE	NA		0.0857852	0.0387089	0.4909		0.0185516	0.642128	0.885974		-0.0907162	0.0686484	0.520756
PAXBP1	21	FALSE	NA		0.0418854	0.0387196	0.4909		0.0484029	0.0110507	0.236734		-0.00307289	0.894566	0.974499
MUCL3	6	FALSE	NA		-0.0828978	0.0387296	0.4909		-0.0208535	0.598696	0.869413		0.127196	0.00933479	0.311593
VCL	10	FALSE	NA		-0.0591852	0.0387569	0.4909		-0.0328945	0.180758	0.596283		0.0228229	0.443014	0.819818
LRRC6	8	FALSE	NA		-0.195392	0.0387632	0.4909		-0.0804543	0.364584	0.738669		0.0439429	0.693096	0.920738
CALD1	7	FALSE	NA		-0.112939	0.0387743	0.4909		0.0316612	0.568524	0.855038		0.0394991	0.528357	0.859909
SLFN11	17	FALSE	NA		0.269347	0.0387784	0.4909		0.181842	0.183546	0.59866		0.0572519	0.726424	0.929995
GIPR	19	FALSE	NA		0.196216	0.0387823	0.4909		-0.0127628	0.885599	0.969897		-0.220486	0.045292	0.481863
KLC1	14	FALSE	NA		0.027919	0.0388074	0.4909		0.00371535	0.776588	0.935878		-0.0105382	0.522843	0.856531
DNAJC18	5	FALSE	NA		0.0989089	0.0388478	0.4909		-0.0331571	0.460497	0.799713		-0.0861946	0.128513	0.590441
SNX24	5	FALSE	NA		-0.0742604	0.0388655	0.4909		-0.0207575	0.572539	0.85697		0.0698481	0.11772	0.577354
SERF1B	5	FALSE	NA		-0.0522029	0.0388728	0.4909		-0.0131233	0.546756	0.846055		0.0686488	0.0109469	0.323964
DDX42	17	FALSE	NA		0.0223192	0.0388754	0.4909		0.0203903	0.0434966	0.379497		-0.00394119	0.75196	0.934357
CPNE2	16	FALSE	NA		-0.0868167	0.0388829	0.4909		-0.0633157	0.12654	0.543606		0.0191817	0.69193	0.920738
HNRNPH2	X	FALSE	Inactive		-0.0277872	0.0389056	0.4909		-0.0109268	0.417647	0.775561		0.0110415	0.504982	0.846722
ACP2	11	FALSE	NA		0.0605399	0.0389392	0.4909		0.00129962	0.957494	0.990364		-0.092855	0.00249418	0.211489
KLK13	19	FALSE	NA		-0.113066	0.0389422	0.4909		-0.122427	0.0370861	0.357558		0.0500494	0.478445	0.836146
TRIM44	11	FALSE	NA		0.0601682	0.0389717	0.4909		0.010096	0.737684	0.922464		-0.0809576	0.0344303	0.446391
CNTD1	17	FALSE	NA		0.0941107	0.0389864	0.4909		0.113029	0.0111548	0.237809		-0.0355293	0.519567	0.855037
OPN5	6	FALSE	NA		-0.0420561	0.0390203	0.490938		-0.0268274	0.135185	0.554888		0.0484593	0.0305036	0.429492
TLK2	17	FALSE	NA		0.0292337	0.0390441	0.490938		0.0347904	0.010074	0.232156		-0.002418	0.883538	0.971036
KMT2A	11	FALSE	NA		0.0439028	0.0390663	0.490938		0.00508755	0.800134	0.944197		-0.0492359	0.0479235	0.483971
PSMG2	18	FALSE	NA		-0.0337301	0.039131	0.490938		-0.0109181	0.487926	0.813994		0.0376816	0.0503178	0.488189
ADIPOQ	3	FALSE	NA		-0.0262936	0.0391541	0.490938		-0.0493493	0.0131027	0.253694		0.0289984	0.234109	0.68597
FAM78A	9	FALSE	NA		0.156899	0.0391645	0.490938		0.0117765	0.880407	0.968777		0.0301201	0.742958	0.932797
C10orf67	10	FALSE	NA		-0.0972849	0.0391686	0.490938		-0.00555714	0.898199	0.973392		0.0991235	0.0751076	0.53282
NUDT17	1	FALSE	NA		0.104316	0.0393012	0.492178		-0.0863688	0.0668518	0.442838		-0.162642	0.00609461	0.273076
TAF12	1	FALSE	NA		-0.0411837	0.0393188	0.492178		-0.0371239	0.0486445	0.397564		-0.00535987	0.812723	0.952219
ROPN1B	3	FALSE	NA		0.147543	0.039429	0.493178		0.103874	0.131834	0.550376		-0.0201999	0.798152	0.948631
TEF	22	FALSE	NA		0.0828824	0.0394602	0.493178		0.000578506	0.987763	0.996702		-0.0692532	0.157036	0.616684
PRDX3	10	FALSE	NA		-0.0304775	0.0394972	0.493178		-0.0267858	0.0538038	0.411004		0.0176087	0.299682	0.733525
ADGRF2	6	FALSE	NA		-0.0507364	0.0395015	0.493178		-0.0474964	0.0797116	0.468597		0.0808261	0.0123256	0.332944
PARVA	11	FALSE	NA		-0.0939209	0.0395981	0.493202		-0.0125958	0.776981	0.936148		0.00294989	0.953021	0.990734
CAMKV	3	FALSE	NA		0.165227	0.0396265	0.493202		0.104395	0.191509	0.607365		-0.0585725	0.537792	0.864915
SETD5	3	FALSE	NA		0.0319177	0.0396511	0.493202		0.00212139	0.890561	0.971439		-0.0486809	0.0105159	0.320515
ATP6V1FNB	7	FALSE	NA		0.114411	0.039787	0.493202		0.228156	1.58e-05	0.00758157		0.0497167	0.438873	0.817804
DNAJB4	1	FALSE	NA		-0.0639238	0.0397884	0.493202		-0.0350799	0.22613	0.636493		0.0139158	0.689435	0.91961
DIP2C	10	FALSE	NA		0.135994	0.0398284	0.493202		0.122113	0.0765213	0.463552		-0.0209389	0.805338	0.950632
S100A10	1	FALSE	NA		-0.117544	0.0398303	0.493202		-0.105095	0.0289522	0.332382		0.065229	0.279444	0.720146
LDHD	16	FALSE	NA		-0.157516	0.039874	0.493202		-0.0924833	0.210711	0.622154		0.0612271	0.507406	0.847829
PTN	7	FALSE	NA		0.215995	0.0399155	0.493202		0.195714	0.0843077	0.479846		-0.052088	0.701025	0.92305
AK8	9	FALSE	NA		-0.135193	0.039925	0.493202		0.0361333	0.545653	0.8457		0.112864	0.137434	0.59845
CHRM2	7	FALSE	NA		-0.0849009	0.0399256	0.493202		-0.0471921	0.1955	0.609392		0.126214	0.00564599	0.266304
SMIM32	5	FALSE	NA		-0.0848739	0.0399313	0.493202		-0.0462113	0.218367	0.628808		0.113134	0.0138721	0.346132
PILRA	7	FALSE	NA		0.166454	0.039952	0.493202		0.196961	0.0102392	0.232913		-0.073601	0.435633	0.81678
FAM228B	2	FALSE	NA		-0.103044	0.0399856	0.493202		0.0293395	0.57086	0.856468		0.0670136	0.26506	0.710534
GCLM	1	FALSE	NA		-0.0708804	0.039987	0.493202		-0.0656996	0.0501573	0.401079		0.025537	0.54446	0.868327
HRK	12	FALSE	NA		0.18903	0.0399939	0.493202		-0.00117714	0.989771	0.997417		-0.198944	0.0670897	0.51525
MLX	17	FALSE	NA		0.0289339	0.0400028	0.493202		-0.00884005	0.507303	0.822919		-0.0231955	0.159402	0.618671
CHMP2B	3	FALSE	NA		-0.0515351	0.0400065	0.493202		-0.00226929	0.925331	0.981276		0.0579777	0.0462073	0.483082
UBE2E2	3	FALSE	NA		-0.166465	0.0400326	0.493202		-0.266822	0.000363002	0.0508193		-0.0922829	0.282504	0.722721
PBX3	9	FALSE	NA		0.0930955	0.0400391	0.493202		0.106822	0.0227441	0.300715		-0.0255774	0.654761	0.909486
DGAT2L6	X	FALSE	Variable		-0.0550493	0.0400436	0.493202		-0.0361142	0.124131	0.539858		0.0420873	0.157461	0.616684
OBSCN	1	FALSE	NA		0.174811	0.0401368	0.494033		-0.034295	0.634012	0.883675		-0.238692	0.0146841	0.351121
CD151	11	FALSE	NA		-0.0467669	0.0402549	0.494461		-0.00755541	0.688705	0.90551		0.0193655	0.400072	0.798687
POLR2L	11	FALSE	NA		-0.0382255	0.0402836	0.494461		-0.0229467	0.188025	0.603172		0.0264138	0.216882	0.671823
WFDC3	20	FALSE	NA		-0.166073	0.0402936	0.494461		-0.0676133	0.413198	0.772297		0.0768117	0.451648	0.823805
VAMP3	1	FALSE	NA		-0.0496273	0.0403097	0.494461		-0.0535797	0.0103379	0.233533		0.0270693	0.290045	0.727559
EZH1	17	FALSE	NA		0.0475435	0.0403167	0.494461		0.0265197	0.253335	0.66107		-0.055001	0.0476349	0.483971
UGT2A3	4	FALSE	NA		-0.0822306	0.0403594	0.494461		-0.00340347	0.92508	0.981276		0.13251	0.00216408	0.20423
DPH1	17	FALSE	NA		0.0445596	0.0403694	0.494461		-0.0055559	0.771117	0.934975		-0.0211422	0.384105	0.788636
CIAO2B	16	FALSE	NA		-0.0269478	0.0404157	0.494461		-0.0243527	0.054526	0.41252		0.0260221	0.0978539	0.558872
MRPL3	3	FALSE	NA		-0.027701	0.0404585	0.494461		-0.0293365	0.0291808	0.332393		0.00955842	0.562745	0.874578
KCNA1	12	FALSE	NA		0.0794888	0.0404599	0.494461		0.0677378	0.0514035	0.40399		-0.0366643	0.388519	0.79223
CMC1	3	FALSE	NA		-0.0419265	0.0404681	0.494461		-0.0352633	0.0677175	0.443408		0.0271256	0.243656	0.69503
TRO	X	FALSE	Inactive		0.165605	0.0405504	0.494461		0.0524473	0.515296	0.827693		-0.0908506	0.332665	0.756378
PLEKHO2	15	FALSE	NA		0.0917605	0.0405509	0.494461		0.0681828	0.122138	0.537393		-0.0800135	0.111219	0.575092
CHP1	15	FALSE	NA		-0.0381449	0.0405529	0.494461		-0.0598765	0.000629151	0.0663028		0.0198572	0.35754	0.772221
CHMP1A	16	FALSE	NA		-0.0298689	0.0405731	0.494461		-0.0291352	0.0258937	0.315479		0.0108428	0.502647	0.845876
SLC25A31	4	FALSE	NA		-0.027094	0.0405842	0.494461		-0.0180228	0.13547	0.555657		0.0240572	0.107107	0.57175
RAB40AL	X	FALSE	NA		-0.0719662	0.0406785	0.494842		0.01221	0.701355	0.909883		0.0568628	0.166902	0.627508
ADAMTS13	9	FALSE	NA		0.144055	0.0406968	0.494842		0.0996683	0.1493	0.572052		-0.0979001	0.25459	0.702342
COQ10B	2	FALSE	NA		-0.0459438	0.040702	0.494842		-0.015566	0.46994	0.805078		0.0478528	0.0670384	0.515062
INTS9	8	FALSE	NA		0.0480907	0.0407225	0.494842		-0.00415422	0.853306	0.961109		-0.0624028	0.0202354	0.384893
SULT2A1	19	FALSE	NA		-0.0631736	0.0407448	0.494842		-0.0257868	0.377264	0.748401		0.11077	0.00184405	0.193254
ADGRB1	8	FALSE	NA		0.162208	0.0407702	0.494842		-0.0258288	0.765121	0.932237		-0.0447949	0.641322	0.904377
C6orf201	6	FALSE	NA		0.0712561	0.0409066	0.495112		0.0557086	0.0863475	0.484177		-0.0698042	0.0793476	0.539248
CCNL2	1	FALSE	NA		0.0365096	0.0409308	0.495112		0.0110166	0.516058	0.828086		-0.0285436	0.179479	0.639371
DEFA5	8	FALSE	NA		-0.0711307	0.0410039	0.495112		0.0276907	0.382412	0.752618		0.0406068	0.334576	0.757653
CLCA4	1	FALSE	NA		-0.094667	0.0410334	0.495112		-0.0457755	0.28411	0.682326		0.0925763	0.0753506	0.53282
RPL26	17	FALSE	NA		-0.0360526	0.0410436	0.495112		-0.0291865	0.0785947	0.467888		0.0218669	0.27882	0.720146
CNEP1R1	16	FALSE	NA		-0.0411113	0.0410675	0.495112		0.00121255	0.950731	0.987726		0.0285838	0.233038	0.685846
C19orf33	19	FALSE	NA		-0.154581	0.0410855	0.495112		-0.186611	0.0116883	0.241239		-0.0409212	0.632959	0.901905
NEDD8	14	FALSE	NA		-0.0261485	0.0411067	0.495112		-0.0281862	0.0243502	0.30843		0.0129806	0.399663	0.798534
SLC36A2	5	FALSE	NA		-0.0494924	0.0411567	0.495112		-0.0157061	0.428596	0.779816		0.0481708	0.0541648	0.497125
MLNR	13	FALSE	NA		0.0561558	0.0411647	0.495112		-0.0367514	0.176145	0.593923		-0.0284099	0.364343	0.776952
ZNF385B	2	FALSE	NA		0.17581	0.0411755	0.495112		0.170493	0.0420201	0.374104		0.0321776	0.731758	0.931308
WDR24	16	FALSE	NA		0.0579337	0.0411936	0.495112		0.0106725	0.677257	0.900714		-0.0465683	0.151331	0.61119
TAF9	5	FALSE	NA		-0.0356533	0.0411943	0.495112		-0.0153332	0.34519	0.726126		0.0224346	0.255837	0.703397
VRK2	2	FALSE	NA		-0.0936868	0.0412043	0.495112		-0.0866886	0.0201991	0.289939		0.0314073	0.476802	0.835598
CYP7B1	8	FALSE	NA		0.187577	0.0412053	0.495112		0.242026	0.00486727	0.1694		0.0212408	0.826123	0.956291
HMGN1	21	FALSE	NA		-0.0226474	0.0412055	0.495112		-0.000169571	0.987251	0.996587		0.0351583	0.00675592	0.282816
STAT5B	17	FALSE	NA		0.0473341	0.0412822	0.495283		0.0655631	0.0102508	0.232913		-0.00642363	0.833486	0.958726
MAGED4	X	FALSE	NA		0.168903	0.041287	0.495283		0.106893	0.277349	0.676337		0.0371792	0.751112	0.934117
GABRG2	5	FALSE	NA		0.132837	0.0412972	0.495283		-0.138222	0.0640172	0.436481		-0.405657	1.57e-05	0.0083701
TALDO1	11	FALSE	NA		-0.0316147	0.0413555	0.495671		-0.0155717	0.300597	0.694609		0.0086868	0.637696	0.903183
RAB27B	18	FALSE	NA		-0.199297	0.0413895	0.495678		0.0357906	0.695896	0.907555		0.133165	0.22396	0.676574
APRT	16	FALSE	NA		-0.0350966	0.0414078	0.495678		-0.0265125	0.0936434	0.493081		0.0508701	0.00936673	0.31185
AOX1	2	FALSE	NA		-0.213738	0.0414388	0.495741		-0.0568078	0.574393	0.857567		0.0805403	0.518831	0.854798
ADAM12	10	FALSE	NA		-0.197982	0.0414868	0.495924		0.0247071	0.794621	0.942157		-0.00837398	0.944417	0.989353
PLP2	X	FALSE	Inactive		-0.0741858	0.0415111	0.495924		-0.0211132	0.513522	0.826575		0.0350571	0.358485	0.773145
GAGE13	X	FALSE	NA		0.112951	0.0415372	0.495924		-0.173678	0.0276498	0.324504		-0.146265	0.0903899	0.550984
CKM	19	FALSE	NA		0.107169	0.041579	0.495924		0.0973653	0.0514441	0.40399		-0.082835	0.175838	0.636693
ELF4	X	FALSE	Inactive		-0.0990362	0.0416211	0.495924		-0.000434054	0.992141	0.997659		0.035663	0.498132	0.843396
SLC22A17	14	FALSE	NA		0.155518	0.0416311	0.495924		0.168787	0.0492925	0.398954		0.0758583	0.460038	0.82696
ATG3	3	FALSE	NA		-0.03027	0.0416839	0.495924		-0.0312549	0.03204	0.34372		0.00858438	0.626759	0.89871
UEVLD	11	FALSE	NA		-0.0586006	0.0416959	0.495924		0.00386946	0.882451	0.969175		0.0166676	0.594065	0.886684
B4GALT1	9	FALSE	NA		-0.0619831	0.0416998	0.495924		0.00163096	0.955146	0.989458		0.024804	0.485851	0.838479
RPP25	15	FALSE	NA		-0.176802	0.0417127	0.495924		-0.272231	0.000939429	0.0817691		0.0274261	0.783513	0.944604
CD38	4	FALSE	NA		-0.150005	0.0417531	0.496097		-0.185909	0.00853923	0.216038		-0.0921273	0.300769	0.734054
COX7B	X	FALSE	Variable		-0.0350836	0.0418518	0.49693		-0.0223854	0.175283	0.592598		0.0319008	0.116214	0.576364
GABARAPL2	16	FALSE	NA		-0.0269898	0.0419174	0.49693		-0.0228711	0.06474	0.438128		0.0105167	0.485765	0.838479
AADACL4	1	FALSE	NA		-0.0480714	0.0419262	0.49693		-0.0149408	0.445876	0.789713		0.0629421	0.0098549	0.315337
TTPA	8	FALSE	NA		-0.127024	0.0419333	0.49693		-0.0620802	0.282951	0.681248		0.153335	0.0426114	0.475042
SNAP23	15	FALSE	NA		-0.0397928	0.0419529	0.49693		-0.0606184	0.000365702	0.0508193		-0.0275519	0.175993	0.636693
TJP2	9	FALSE	NA		-0.0968196	0.0419946	0.497118		0.00764407	0.864253	0.964701		0.0481455	0.370256	0.779749
ATP5MPL	14	FALSE	NA		-0.0323959	0.0420786	0.497781		-0.0197051	0.201151	0.614638		0.0463804	0.0143411	0.351008
S100A11	1	FALSE	NA		-0.119542	0.0421264	0.497781		-0.140389	0.00501578	0.171152		0.0432007	0.486182	0.838899
AMDHD2	16	FALSE	NA		0.0587687	0.0421586	0.497781		0.0290189	0.282321	0.680987		-0.0869837	0.00998506	0.315531
PTPN5	11	FALSE	NA		0.0815417	0.042211	0.497781		0.0666019	0.0457902	0.386496		0.0119335	0.757486	0.936335
CCER2	19	FALSE	NA		0.124244	0.0422146	0.497781		0.153538	0.00863714	0.216748		-0.00423217	0.950646	0.990734
CCDC62	12	FALSE	NA		0.0802187	0.0422228	0.497781		0.0492655	0.187197	0.601974		-0.0694042	0.136394	0.596796
RMC1	18	FALSE	NA		-0.0437817	0.0422323	0.497781		0.0190031	0.351211	0.72999		0.0917493	0.000246186	0.0710486
C1orf53	1	FALSE	NA		-0.110656	0.0423374	0.498564		-0.107195	0.0336921	0.346599		0.10772	0.0936686	0.552363
PDZRN3	3	FALSE	NA		0.165916	0.0423508	0.498564		0.141471	0.0613968	0.431073		-0.044292	0.619158	0.89558
ATP6V1G2	6	FALSE	NA		0.136393	0.0424162	0.49881		0.0532505	0.404388	0.76736		-0.0842357	0.27083	0.715018
RYR3	15	FALSE	NA		0.126341	0.0424237	0.49881		0.0928823	0.123984	0.539758		-0.0659386	0.367377	0.778002
F11	4	FALSE	NA		-0.0638979	0.0424957	0.49935		-0.00853562	0.743823	0.92454		0.103494	0.00133299	0.160163
CCDC17	1	FALSE	NA		0.0927191	0.0425343	0.499498		-0.103135	0.0331419	0.346599		-0.163587	0.00450981	0.25483
SPATA16	3	FALSE	NA		-0.031063	0.042572	0.49961		-0.018915	0.162404	0.582012		0.0271434	0.105684	0.569761
ZC3H10	12	FALSE	NA		0.0632663	0.0426076	0.49961		0.0266657	0.374752	0.74625		-0.0529706	0.151691	0.611386
EIF2AK2	2	FALSE	NA		-0.0466687	0.0426383	0.49961		-0.0284004	0.195401	0.609392		0.0066718	0.803653	0.950456
TRIM37	17	FALSE	NA		0.0406294	0.0426481	0.49961		0.044493	0.0165135	0.269043		-0.0383768	0.0905588	0.550984
WWC1	5	FALSE	NA		-0.113064	0.0426971	0.499879		-0.0076814	0.867558	0.965296		0.0683073	0.277021	0.71898
TMEM159	16	FALSE	NA		-0.112129	0.0427492	0.500184		-0.0702211	0.158158	0.57794		0.0485942	0.416968	0.809326
TPGS2	18	FALSE	NA		-0.0328662	0.0428114	0.50026		-0.0138794	0.427719	0.779791		0.0636259	0.00333553	0.241129
HLA.DMB	6	FALSE	Inactive		-0.182732	0.0428337	0.50026		-0.027769	0.781914	0.937963		0.22197	0.0584909	0.501838
PTPN14	1	FALSE	NA		-0.118075	0.042844	0.50026		-0.115263	0.0179561	0.276139		-0.029014	0.621839	0.896594
EML1	14	FALSE	NA		-0.131884	0.042895	0.50026		0.109473	0.182039	0.597395		0.393258	4.66e-05	0.0217732
NOVA1	14	FALSE	NA		0.17749	0.0429102	0.50026		-0.0306314	0.754658	0.929007		-0.305202	0.00885308	0.307094
DUSP21	X	FALSE	NA		-0.0523447	0.0429133	0.50026		-0.0159421	0.418352	0.776027		0.0594288	0.0158629	0.356628
IFIT2	10	FALSE	NA		-0.19082	0.0429689	0.50026		-0.0285531	0.749434	0.92666		-0.0989721	0.356866	0.77152
PARP6	15	FALSE	NA		0.0791794	0.0429818	0.50026		0.0245541	0.566457	0.854543		0.0431287	0.423993	0.811701
SLC46A3	13	FALSE	NA		-0.195796	0.0429905	0.50026		0.0600311	0.531429	0.8374		0.255988	0.0257306	0.410512
ZSCAN22	19	FALSE	NA		0.0655653	0.0430786	0.500583		-0.0047359	0.876117	0.967567		-0.0384258	0.309358	0.73926
WFDC10A	20	FALSE	NA		-0.0397748	0.0430788	0.500583		-0.0366017	0.0617585	0.431073		0.0201713	0.409939	0.804329
TMEM213	7	FALSE	NA		-0.0592627	0.0430966	0.500583		-0.0174802	0.507881	0.823092		0.0711722	0.0303899	0.429327
GSTA5	6	FALSE	NA		-0.0259793	0.0432042	0.501252		-0.0219291	0.0606922	0.430045		0.0313071	0.0298337	0.429012
PEX5L	3	FALSE	NA		0.159803	0.0432064	0.501252		0.237346	0.000780164	0.0744339		-0.0314409	0.700808	0.92305
CHMP1B	18	FALSE	NA		-0.0389521	0.0432816	0.501548		-0.014489	0.446493	0.789744		0.0221817	0.342571	0.763982
SPDYE2	7	FALSE	NA		0.151876	0.0432842	0.501548		0.0915262	0.189972	0.60577		-0.144883	0.0900356	0.550984
SREK1IP1	5	FALSE	NA		-0.0593048	0.0433681	0.502217		-0.000839519	0.975792	0.994592		0.0912877	0.00701797	0.284508
PHF14	7	FALSE	NA		0.0415988	0.0434083	0.502378		0.019617	0.301733	0.695701		-0.00832021	0.727285	0.930107
EXT1	8	FALSE	NA		-0.0786021	0.0434721	0.502509		-0.0523316	0.116037	0.52787		-0.046658	0.258797	0.705766
CENATAC	11	FALSE	NA		0.0572186	0.0434872	0.502509		0.00959291	0.719931	0.916827		-0.01578	0.648933	0.90747
SPATA4	4	FALSE	NA		-0.099698	0.043512	0.502509		-0.00434225	0.922974	0.980494		0.105741	0.0667763	0.513974
VDAC2	10	FALSE	NA		-0.0281396	0.0435601	0.502509		-0.0324137	0.0138951	0.258678		0.0139743	0.389625	0.793212
ERN1	17	FALSE	NA		0.0845462	0.0435721	0.502509		0.0649532	0.101817	0.50644		-0.0311872	0.533869	0.863384
ENY2	8	FALSE	NA		-0.0281877	0.0435902	0.502509		-0.0302923	0.023529	0.304435		0.0175696	0.284544	0.724488
KCNJ15	21	FALSE	NA		-0.170895	0.0436394	0.502509		-0.113042	0.187051	0.601959		0.0117311	0.915604	0.982183
TES	7	FALSE	NA		-0.152414	0.0436558	0.502509		-0.141893	0.0206678	0.292367		0.0604402	0.431839	0.815788
WFDC6	20	FALSE	NA		-0.0360484	0.0436799	0.502509		-0.0336126	0.0811279	0.472023		0.0407217	0.0862148	0.547666
OSBPL9	1	FALSE	NA		-0.0371257	0.0436816	0.502509		-0.0239817	0.173882	0.591545		-0.000736218	0.972456	0.993281
ZNF609	15	FALSE	NA		0.0473147	0.0437648	0.502615		0.0172419	0.421157	0.77661		-0.0713306	0.00642802	0.276926
CPSF7	11	FALSE	NA		0.0209702	0.0437725	0.502615		0.00709241	0.515031	0.827406		-0.0192171	0.151941	0.611829
AP3B2	15	FALSE	NA		0.21558	0.0438217	0.502615		0.287314	0.0047976	0.168017		0.016267	0.89306	0.974076
BCL7C	16	FALSE	NA		-0.04671	0.0438313	0.502615		-0.0197449	0.357659	0.734119		0.0639214	0.0172893	0.364029
LYSMD3	5	FALSE	NA		-0.0630534	0.0438832	0.502615		-0.0441472	0.107633	0.517573		-0.00256511	0.936378	0.987069
MXD3	5	FALSE	NA		0.0800019	0.0439075	0.502615		0.0437183	0.231991	0.643936		-0.0269469	0.557956	0.872911
OLFM1	9	FALSE	NA		0.200981	0.043924	0.502615		0.263072	0.0179081	0.275621		0.129656	0.28751	0.725917
MTM1	X	FALSE	Inactive		-0.0640127	0.0439389	0.502615		0.00475086	0.880463	0.968777		0.0164741	0.654584	0.909371
RSF1	11	FALSE	NA		0.0424597	0.0439608	0.502615		-0.0129222	0.520133	0.830316		-0.0622004	0.0130846	0.337118
UBE2Q2	15	FALSE	NA		-0.049795	0.0439726	0.502615		-0.0230252	0.348459	0.72809		0.0361394	0.220696	0.674202
ASGR1	17	FALSE	NA		0.171932	0.0439791	0.502615		0.0539183	0.496352	0.817533		-0.118292	0.217687	0.671823
SUSD3	9	FALSE	NA		-0.209568	0.0440311	0.502624		0.0276553	0.790565	0.940794		0.10323	0.41224	0.805592
CHGA	14	FALSE	NA		0.167105	0.0440523	0.502624		0.0718667	0.411413	0.771618		-0.0987582	0.305198	0.736454
NCOR2	12	FALSE	NA		0.0565533	0.0440741	0.502624		0.000475919	0.983663	0.996009		-0.0609497	0.0415358	0.472473
CCNYL1	2	FALSE	NA		-0.0599821	0.0440974	0.502624		-0.0903229	0.00115462	0.09112		0.0379505	0.286629	0.725917
POU2AF1	11	FALSE	NA		-0.211913	0.0441315	0.502624		-0.0343911	0.700519	0.909508		0.118301	0.269291	0.713855
TIGIT	3	FALSE	NA		-0.0810074	0.0441459	0.502624		-0.0636409	0.0600589	0.428798		0.0464863	0.280506	0.721662
HIC1	17	FALSE	NA		0.155213	0.0441634	0.502624		0.10528	0.154316	0.576192		-0.211307	0.0211599	0.391277
ACTL9	19	FALSE	NA		-0.0256735	0.0441934	0.502667		-0.0349649	0.0220138	0.298478		0.0197651	0.292375	0.729192
DPY19L2	12	FALSE	NA		0.185675	0.0442489	0.502693		0.0497679	0.569121	0.85513		0.0378639	0.721291	0.928918
GDF11	12	FALSE	NA		0.100345	0.0442576	0.502693		-0.0951797	0.0343818	0.348644		-0.112337	0.0477927	0.483971
OR52A1	11	FALSE	NA		-0.0367172	0.0442949	0.502693		-0.0117221	0.461802	0.800215		0.0259385	0.193639	0.65079
CENPJ	13	FALSE	NA		0.0626097	0.0443006	0.502693		0.0380932	0.188767	0.604323		-0.0473075	0.180117	0.640273
PIAS4	19	FALSE	NA		0.0433958	0.0443626	0.5031		-0.00540178	0.782708	0.938042		-0.0234053	0.343024	0.764205
COX8C	14	FALSE	NA		-0.0567203	0.0444418	0.5037		-0.0204411	0.484501	0.812155		0.0100864	0.791372	0.947268
MELTF	3	FALSE	NA		0.12271	0.0445192	0.50428		0.148132	0.0204685	0.291744		0.0372242	0.639964	0.903925
USP14	18	FALSE	NA		-0.0294303	0.0445484	0.504312		-0.0104072	0.4789	0.810079		0.0237993	0.18752	0.646068
SMIM27	9	FALSE	NA		-0.0552427	0.0445877	0.50446		0.0800759	0.00700824	0.197441		0.0843286	0.011425	0.326038
ZBTB46	20	FALSE	NA		0.141362	0.0446173	0.504496		0.173811	0.00721732	0.200494		-0.0353998	0.662461	0.910591
SNAPC1	14	FALSE	NA		-0.072603	0.0447025	0.505162		-0.0737529	0.0349804	0.349932		-0.00997352	0.813786	0.952232
RAB32	6	FALSE	NA		-0.178028	0.0447925	0.505881		-0.173843	0.0244382	0.308729		0.0251586	0.781916	0.944191
OR4F21	8	FALSE	NA		-0.0421254	0.0448434	0.50602		0.00168367	0.927077	0.981482		0.0337226	0.148298	0.608655
NDUFS8	11	FALSE	NA		-0.0293743	0.0448576	0.50602		-0.0392131	0.00267553	0.136153		0.0215907	0.184004	0.643444
TAT	16	FALSE	NA		-0.0502156	0.044908	0.506216		-0.0081212	0.753699	0.928887		0.0428295	0.181016	0.641328
NID2	14	FALSE	NA		-0.212986	0.0449533	0.506216		-0.18668	0.0784391	0.467735		0.180672	0.150538	0.610366
TNFSF10	3	FALSE	NA		-0.175548	0.0449612	0.506216		-0.0428698	0.617953	0.877099		0.0598359	0.596934	0.887603
DKKL1	19	FALSE	NA		-0.114381	0.0449806	0.506216		-0.0695216	0.186929	0.601959		0.091678	0.166487	0.627041
TTC22	1	FALSE	NA		-0.155052	0.0450922	0.506458		0.00509683	0.947481	0.986359		0.0708983	0.452147	0.82391
GFAP	17	FALSE	NA		0.119443	0.0451106	0.506458		0.0607047	0.298109	0.693483		-0.182507	0.0103947	0.3196
LPIN1	2	FALSE	NA		0.0704575	0.0451258	0.506458		0.0570216	0.0914621	0.49056		-0.0659707	0.101272	0.564986
KDELR2	7	FALSE	NA		-0.0299374	0.0451645	0.506458		-0.027104	0.0507732	0.402023		0.0327723	0.0583719	0.501838
DCAF7	17	FALSE	NA		0.027591	0.0451863	0.506458		0.0109591	0.409449	0.770938		-0.0110251	0.498077	0.843396
VPREB3	22	FALSE	NA		-0.219948	0.045198	0.506458		-0.22666	0.0255509	0.314763		0.175628	0.152344	0.612346
PFN1	17	FALSE	NA		-0.0292778	0.0452083	0.506458		-0.0371378	0.00531786	0.174924		0.0163862	0.320237	0.74732
KCP	7	FALSE	NA		0.165968	0.0452467	0.506458		0.184389	0.0227532	0.300715		-0.00223499	0.981277	0.995448
DAPK1	9	FALSE	NA		0.240717	0.045258	0.506458		0.161865	0.131787	0.550376		0.353142	0.0221277	0.397686
RWDD4	4	FALSE	NA		-0.0412497	0.045287	0.506458		-0.00691343	0.741224	0.923736		0.0455565	0.0713247	0.524662
ZDHHC22	14	FALSE	NA		0.0994188	0.0452926	0.506458		-0.00883772	0.861415	0.96379		-0.0582009	0.309682	0.739673
TMCO4	1	FALSE	NA		-0.134418	0.0453285	0.506564		-0.0862597	0.156234	0.577442		0.00645081	0.924568	0.983922
CTU1	19	FALSE	NA		0.100648	0.0453559	0.506575		-0.0150935	0.734097	0.920658		-0.100012	0.0745873	0.530878
B3GAT1	11	FALSE	NA		0.159286	0.0454083	0.506866		0.248419	0.00120045	0.0924417		0.0678464	0.429519	0.81429
SWI5	9	FALSE	NA		-0.0417544	0.0454543	0.507044		-0.0368039	0.0575767	0.420479		0.0165114	0.488078	0.840268
CRYBA1	17	FALSE	NA		-0.0520616	0.0454772	0.507044		-0.0311494	0.190175	0.605912		0.0711074	0.0175574	0.365182
ENTR1	9	FALSE	NA		0.0325364	0.0455758	0.507608		0.00321507	0.831035	0.954471		-0.0405245	0.0312917	0.431788
KARS1	16	FALSE	NA		-0.0258584	0.0455908	0.507608		-0.0383037	0.00185762	0.11747		0.0204057	0.178806	0.638705
NR4A1	12	FALSE	NA		0.153223	0.0456072	0.507608		-0.0540965	0.428156	0.779791		-0.16302	0.0658045	0.512356
SPP2	2	FALSE	NA		-0.0469194	0.0456665	0.507747		-0.00923805	0.66386	0.895256		0.0329716	0.220254	0.673932
MFSD4B	6	FALSE	NA		0.073219	0.0456726	0.507747		0.0446748	0.19721	0.611029		-0.0304629	0.481294	0.837016
ZNF215	11	FALSE	NA		-0.220853	0.0457575	0.508396		-0.155748	0.136284	0.555657		0.0825608	0.513641	0.852354
REG1B	2	FALSE	NA		-0.0658723	0.0458588	0.508816		0.000646495	0.980079	0.99596		0.0855401	0.00981525	0.315337
SZT2	1	FALSE	NA		0.0425129	0.0458774	0.508816		0.0455045	0.0293966	0.332393		-0.0414442	0.103702	0.566859
TMEM165	4	FALSE	NA		-0.0307532	0.0459171	0.508816		-0.0170125	0.254188	0.661889		0.0534506	0.00421103	0.25315
LAMP2	X	FALSE	Inactive		-0.0422229	0.0459481	0.508816		-0.00238219	0.899382	0.973652		0.00903872	0.690972	0.920192
OPN1MW	X	FALSE	NA		-0.0318741	0.0459507	0.508816		-0.0236053	0.115514	0.527405		0.0229542	0.220026	0.673782
EFCAB14	1	FALSE	NA		-0.0388651	0.0459545	0.508816		-0.0185395	0.283856	0.682074		0.00159018	0.939518	0.987901
PPM1B	2	FALSE	NA		-0.0312113	0.0460006	0.509033		-0.0169195	0.263946	0.667858		0.0196528	0.287865	0.725917
PANK2	20	FALSE	NA		0.0320535	0.0460829	0.50965		0.0280054	0.0784254	0.467735		-0.0178418	0.364499	0.776952
WIPF2	17	FALSE	NA		0.0344811	0.0461201	0.509767		-0.00829671	0.626778	0.879976		-0.0253075	0.24485	0.695937
EIF4E2	2	FALSE	NA		-0.0267665	0.0461946	0.51004		-0.0335281	0.0061907	0.185499		0.00860589	0.567945	0.877273
DIPK1A	1	FALSE	NA		-0.0939722	0.0462177	0.51004		-0.00770908	0.873057	0.966887		0.056493	0.302164	0.734776
SNX2	5	FALSE	NA		-0.0426489	0.0462353	0.51004		-0.0284843	0.148471	0.571657		0.0176509	0.457312	0.826256
FAM241A	4	FALSE	NA		-0.159007	0.0462774	0.51004		-0.21112	0.00272938	0.136739		-0.162802	0.0523616	0.496852
ANAPC2	9	FALSE	NA		0.0421476	0.0463454	0.51004		0.0176199	0.347847	0.727999		-0.0528937	0.0229283	0.398428
ZNF35	3	FALSE	NA		-0.109525	0.0463704	0.51004		-0.0257623	0.601344	0.87022		0.0381437	0.503236	0.846115
MID2	X	FALSE	Variable		-0.1797	0.0463737	0.51004		-0.00469609	0.955539	0.989636		0.0790638	0.453654	0.824581
PSMA6	14	FALSE	NA		-0.0264518	0.0463835	0.51004		-0.0356895	0.00665639	0.190423		0.0120021	0.458881	0.826598
TOR2A	9	FALSE	NA		0.0526665	0.0464123	0.51004		0.05147	0.0330014	0.346208		-0.00868272	0.773454	0.941959
EMC3	3	FALSE	NA		-0.0379675	0.0464589	0.51004		-0.0296302	0.099869	0.502675		0.0110831	0.613434	0.89389
COL10A1	6	FALSE	NA		-0.10183	0.0464614	0.51004		-0.0134365	0.746685	0.92549		0.0659206	0.249385	0.698636
PRDM10	11	FALSE	NA		0.062343	0.0464751	0.51004		0.056083	0.0454124	0.384662		-0.00881668	0.799632	0.949185
NR3C2	4	FALSE	NA		0.145878	0.0464906	0.51004		0.15024	0.0312032	0.339571		-0.101793	0.249704	0.699062
JAKMIP1	4	FALSE	NA		0.126353	0.0465232	0.510106		0.0751097	0.210147	0.62181		-0.024288	0.7226	0.929698
SF3B5	6	FALSE	NA		-0.0290012	0.0465548	0.510161		-0.0238578	0.100208	0.502905		0.0292616	0.100955	0.564929
GLIPR1	12	FALSE	NA		-0.192623	0.0466307	0.510256		-0.116979	0.191852	0.607379		0.110806	0.304821	0.736449
CISD3	17	FALSE	NA		0.0486437	0.0466376	0.510256		0.03556	0.124837	0.540559		-0.0114681	0.695183	0.921009
PTGES3	12	FALSE	NA		-0.025796	0.0466484	0.510256		-0.0246313	0.0478671	0.394816		0.024672	0.108367	0.571931
THSD4	15	FALSE	NA		-0.16304	0.04667	0.510256		-0.147961	0.0548426	0.413025		-0.194064	0.0300058	0.429327
MYO6	6	FALSE	NA		-0.101156	0.0467897	0.510443		-0.00552175	0.906909	0.975661		0.138072	0.0155236	0.355854
LUC7L3	17	FALSE	NA		0.0308667	0.0467969	0.510443		0.0208905	0.155365	0.577119		-0.0217068	0.232287	0.685003
RAP1B	12	FALSE	NA		-0.0302723	0.0468002	0.510443		-0.0231138	0.105465	0.513643		0.0106107	0.541255	0.867047
CELF3	1	FALSE	NA		0.116179	0.0468045	0.510443		0.114018	0.0321197	0.343855		0.0296146	0.621252	0.896445
CYP2D6	22	FALSE	NA		0.127385	0.0468201	0.510443		0.138593	0.0209847	0.293525		-0.0926034	0.209771	0.665583
FHL2	2	FALSE	NA		-0.115751	0.0469704	0.511791		-0.0334717	0.533807	0.838259		0.00404192	0.949793	0.990734
KCTD11	17	FALSE	NA		-0.0931171	0.0470954	0.512861		-0.0440764	0.296085	0.691217		0.0584354	0.275856	0.718791
CDH2	18	FALSE	NA		0.214258	0.0471303	0.51295		0.159012	0.123221	0.538762		0.00543409	0.968096	0.993043
EPYC	12	FALSE	NA		-0.0918855	0.0471681	0.51307		0.0310376	0.391155	0.757581		0.0951014	0.0551037	0.49822
MAP1B	5	FALSE	NA		0.165883	0.0471948	0.51307		-0.0301143	0.668305	0.897422		-0.211384	0.0226219	0.398428
MYBPC3	11	FALSE	NA		-0.0422645	0.0472867	0.513618		-0.0319275	0.0970491	0.498289		0.04648	0.0534277	0.497125
VAPA	18	FALSE	NA		-0.0277026	0.0472988	0.513618		-0.0297509	0.0290932	0.332393		0.0150242	0.370814	0.780108
SEMA6A	5	FALSE	NA		0.197184	0.0473833	0.514195		0.152879	0.0919863	0.491099		-0.125613	0.270189	0.71448
DBNDD1	16	FALSE	NA		0.129983	0.047442	0.514195		0.018396	0.753988	0.928887		-0.169873	0.0256142	0.409173
MSGN1	2	FALSE	NA		-0.055109	0.0474626	0.514195		-0.0118806	0.600542	0.870097		0.0496506	0.0822565	0.543922
CARMIL3	14	FALSE	NA		0.136264	0.0474637	0.514195		0.0724036	0.258753	0.664633		-0.00553398	0.939696	0.987901
S1PR2	19	FALSE	NA		0.130313	0.047486	0.514195		0.165984	0.00700769	0.197441		-0.132229	0.0709168	0.523248
TMEM178A	2	FALSE	NA		0.169554	0.04753	0.51438		0.290205	0.000124374	0.0290869		-0.0129951	0.891087	0.973392
AIFM3	22	FALSE	NA		-0.174202	0.0476773	0.515684		-0.0885374	0.295708	0.690957		0.138418	0.176056	0.636693
ISOC2	19	FALSE	NA		-0.045298	0.0477686	0.516381		-0.0517912	0.00953803	0.227201		0.0378267	0.125841	0.586351
SLITRK5	13	FALSE	NA		0.127986	0.0478069	0.516408		-0.0265637	0.664029	0.895256		-0.0122688	0.858702	0.96638
OR2A7	7	FALSE	NA		-0.130886	0.0478388	0.516408		-0.111557	0.134336	0.55449		0.114826	0.19192	0.650229
FOXO1	13	FALSE	NA		-0.161856	0.04788	0.516408		-0.0587617	0.45295	0.794704		-0.00724202	0.93643	0.987069
RHBDD3	22	FALSE	NA		0.0478355	0.0478982	0.516408		0.00816684	0.716025	0.915597		-0.021673	0.446496	0.82119
AP2S1	19	FALSE	NA		-0.0259957	0.0479138	0.516408		-0.0336901	0.00890718	0.219234		0.00777995	0.622787	0.896594
SNRPG	2	FALSE	NA		-0.0299277	0.0479328	0.516408		-0.030634	0.0368098	0.356516		0.0249	0.167102	0.627582
SMCP	1	FALSE	NA		-0.0504996	0.047998	0.516456		-0.00897301	0.697683	0.908535		0.0668407	0.0214101	0.392363
RASD2	22	FALSE	NA		-0.158284	0.0479985	0.516456		0.00223422	0.977049	0.994949		0.058776	0.545854	0.868989
MT1A	16	FALSE	NA		-0.198232	0.048018	0.516456		-0.201975	0.0499267	0.400436		-0.0291237	0.839992	0.961034
PPARGC1B	5	FALSE	NA		0.127589	0.0480852	0.516496		-0.00523252	0.92942	0.981606		-0.154289	0.0324962	0.435919
DKK2	4	FALSE	NA		0.132822	0.0480936	0.516496		0.0646426	0.315564	0.706373		-0.0779569	0.314031	0.743027
PSME1	14	FALSE	NA		-0.0375012	0.0481025	0.516496		-0.00701796	0.689972	0.906266		0.0289328	0.176504	0.636693
ADGRE1	19	FALSE	NA		-0.180576	0.048189	0.517122		-0.0892605	0.275344	0.674884		-0.0673582	0.546533	0.869046
GNG4	1	FALSE	NA		0.178776	0.0482302	0.517122		0.134404	0.150401	0.572745		-0.0346135	0.769726	0.940553
CAPG	2	FALSE	NA		-0.145478	0.0482417	0.517122		-0.140641	0.039406	0.365057		-0.0165042	0.836453	0.95973
TMEM101	17	FALSE	NA		0.0793956	0.048269	0.517125		-0.0385263	0.201817	0.615008		-0.122935	0.00153549	0.170209
GAR1	4	FALSE	NA		-0.0356081	0.0483003	0.517139		-0.0157872	0.351251	0.72999		0.0332187	0.102061	0.565025
PLS3	X	FALSE	Variable		-0.114593	0.0483746	0.517139		-0.0667442	0.184631	0.600316		0.0412541	0.525972	0.858199
ANXA3	4	FALSE	NA		-0.162469	0.0483887	0.517139		0.0260695	0.759591	0.930655		0.131679	0.190544	0.64869
TXLNA	1	FALSE	NA		0.0339017	0.0484495	0.517139		0.000541054	0.972024	0.993211		-0.0290442	0.130412	0.592128
CENPN	16	FALSE	NA		-0.0385129	0.0484535	0.517139		-0.0756	5.86e-05	0.0184242		-0.0118169	0.614651	0.893904
RIBC2	22	FALSE	NA		-0.215187	0.0484579	0.517139		-0.084302	0.416602	0.774608		0.292732	0.0242156	0.404113
PRKG2	4	FALSE	NA		-0.173757	0.0484614	0.517139		-0.0709296	0.398732	0.763503		0.0822116	0.431941	0.815788
OR6J1	14	FALSE	NA		-0.0255547	0.0484969	0.517139		-0.0222323	0.0610318	0.430871		0.0165319	0.258443	0.705301
HYAL1	3	FALSE	NA		-0.161335	0.048513	0.517139		-0.116904	0.166004	0.584472		0.149607	0.148614	0.608715
BEST1	11	FALSE	NA		0.146289	0.0485627	0.517382		0.0337188	0.642265	0.885974		-0.103463	0.238667	0.690032
HOXC12	12	FALSE	NA		-0.133255	0.0485989	0.517479		-0.0225754	0.734506	0.920791		0.0425897	0.606138	0.890872
AGAP5	10	FALSE	NA		0.0904023	0.0486551	0.517479		0.02881	0.4981	0.818558		-0.083676	0.117777	0.577354
CASP8	2	FALSE	NA		-0.0762744	0.0487335	0.517479		-0.0428354	0.23568	0.647475		0.0501784	0.255174	0.702783
ZNHIT1	7	FALSE	NA		-0.0362243	0.0487796	0.517479		-0.0330207	0.0583582	0.422315		0.0364609	0.093009	0.551429
ZNF212	7	FALSE	NA		0.0433968	0.0487949	0.517479		-0.00920687	0.658342	0.893039		-0.0424233	0.105654	0.569761
APOBEC3A	22	FALSE	NA		-0.100864	0.0488005	0.517479		-0.0284924	0.534934	0.839009		0.140297	0.0115964	0.326115
CACNB1	17	FALSE	NA		0.096801	0.0488119	0.517479		0.0442884	0.341734	0.724056		-0.101318	0.0792914	0.53921
NOX3	6	FALSE	NA		-0.0468089	0.0488173	0.517479		-0.0220842	0.403911	0.767327		0.0446259	0.179572	0.639371
CRACD	4	FALSE	NA		0.185688	0.0488276	0.517479		0.13378	0.122707	0.538261		-0.0396938	0.71165	0.925241
RAP1A	1	FALSE	NA		-0.0379864	0.0488556	0.517479		-0.0247575	0.172133	0.589886		0.00801069	0.714013	0.926059
ILF3	19	FALSE	NA		0.022847	0.0489034	0.517479		0.00908815	0.405426	0.768196		-0.0106207	0.428626	0.813677
ANXA6	5	FALSE	NA		0.151626	0.0489363	0.517479		0.116411	0.14279	0.562985		-0.125183	0.167525	0.628129
FOXJ3	1	FALSE	NA		0.032902	0.0489389	0.517479		0.0102095	0.498839	0.818912		-0.0301864	0.106693	0.571525
LAT	16	FALSE	NA		0.14863	0.0489497	0.517479		0.166255	0.0190839	0.283479		0.0254863	0.772402	0.941525
NXT2	X	FALSE	Inactive		-0.0664337	0.0489941	0.517524		-0.0212679	0.546464	0.846055		0.084675	0.0493174	0.484235
LGALS8	1	FALSE	NA		-0.068246	0.0490279	0.517524		-0.0408579	0.172663	0.590203		0.0164768	0.649811	0.907644
EPB41L3	18	FALSE	NA		0.264711	0.0490348	0.517524		0.291982	0.0208409	0.292367		-0.128222	0.390076	0.793212
PRELID3B	20	FALSE	NA		-0.0319164	0.0490948	0.517872		-0.0244447	0.119771	0.533692		0.0067713	0.723286	0.929722
EIF4G2	11	FALSE	NA		-0.0208981	0.0491404	0.518068		-0.000139971	0.989236	0.997112		0.0125516	0.326267	0.750947
NLRP9	19	FALSE	NA		-0.0314968	0.0492391	0.518773		-0.0252314	0.0970457	0.498289		0.0265027	0.161104	0.622252
RSPH10B2	7	FALSE	NA		0.0547933	0.0492784	0.518773		0.00750326	0.777701	0.936312		-0.0119297	0.704038	0.923541
GALNT1	18	FALSE	NA		-0.0541901	0.0492906	0.518773		0.0334693	0.242804	0.652617		0.0578922	0.0948568	0.554215
PRRC2A	6	FALSE	NA		0.025298	0.0493155	0.518773		-0.00260193	0.826116	0.953133		-0.00449985	0.759401	0.936759
ZNF830	17	FALSE	NA		0.0376797	0.0494038	0.519381		0.00802601	0.665444	0.89597		-0.01369	0.550562	0.869905
HBG2	11	FALSE	NA		0.18288	0.049446	0.519381		0.0208309	0.825942	0.953133		-0.173564	0.121875	0.580823
PSMB5	14	FALSE	NA		-0.0275802	0.0494995	0.519381		-0.0299987	0.0254365	0.314689		0.0285733	0.0864097	0.547666
KNOP1	16	FALSE	NA		0.0401544	0.049508	0.519381		0.00499143	0.781054	0.937698		-0.0296047	0.200897	0.657786
PSMD13	11	FALSE	NA		-0.0266637	0.0495087	0.519381		-0.0110225	0.401768	0.765415		0.0141721	0.376987	0.784108
GNB3	12	FALSE	NA		0.145933	0.0495895	0.519895		0.00447667	0.946827	0.98622		-0.185817	0.0217398	0.396185
VTI1B	14	FALSE	NA		-0.0279079	0.049612	0.519895		-0.0421712	0.00208535	0.122204		0.0141399	0.405127	0.802099
ACKR3	2	FALSE	NA		-0.249524	0.0496974	0.520506		-0.0521253	0.655686	0.89201		0.0854713	0.590238	0.885304
DECR1	8	FALSE	NA		-0.0676037	0.0497473	0.520568		-0.0453641	0.173472	0.591368		0.0227785	0.560432	0.873808
SPAG7	17	FALSE	NA		-0.033931	0.0498085	0.520568		-0.0152821	0.373748	0.745459		0.0435258	0.0401592	0.469422
DHRS4L2	14	FALSE	NA		-0.0727755	0.0498615	0.520568		-0.0459823	0.179674	0.595749		0.0717283	0.088386	0.549644
MMP25	16	FALSE	NA		0.136354	0.0499358	0.520568		0.140179	0.0268892	0.32108		-0.00112656	0.988038	0.997852
EIF2S2	20	FALSE	NA		-0.0286169	0.0499427	0.520568		-0.0301861	0.0263477	0.317671		-0.00131975	0.936672	0.987117
ATP6V1E1	22	FALSE	NA		-0.0297955	0.0499612	0.520568		-0.0324007	0.0311119	0.339571		0.00579669	0.751668	0.934202
SPATA21	1	FALSE	NA		0.0554502	0.0499771	0.520568		0.0284777	0.273277	0.673935		0.00538859	0.862391	0.967303
LTB4R	14	FALSE	NA		0.114905	0.0499888	0.520568		0.043102	0.431998	0.781711		-0.0489395	0.486309	0.838931
OLA1	2	FALSE	NA		-0.0281534	0.0500333	0.520568		0.00853584	0.531169	0.837293		0.0359785	0.0316259	0.431788
CBLC	19	FALSE	NA		-0.151045	0.050049	0.520568		-0.0346867	0.674063	0.899592		0.216892	0.0301396	0.429327
COQ2	4	FALSE	NA		-0.0496493	0.0500635	0.520568		-0.0107159	0.646959	0.888195		0.0511766	0.0732832	0.527931
PPCS	1	FALSE	NA		-0.0424716	0.0500715	0.520568		-0.0303497	0.111136	0.521026		0.0221044	0.347086	0.768244
SMTNL2	17	FALSE	NA		0.1115	0.0500727	0.520568		0.0241457	0.702403	0.910025		-0.00771226	0.912524	0.981572
PCDHA1	5	FALSE	NA		0.0906622	0.0500833	0.520568		0.0278015	0.55689	0.851023		-0.042662	0.441818	0.819019
SMR3A	4	FALSE	NA		-0.0256332	0.0502101	0.520864		-0.0152172	0.265472	0.669023		0.0132947	0.433125	0.816267
DNTTIP1	20	FALSE	NA		-0.035573	0.0502489	0.520864		-0.0614154	0.000926947	0.0815415		0.000977178	0.966205	0.992941
KIRREL2	19	FALSE	NA		0.159841	0.050289	0.520864		-0.00802931	0.91809	0.979211		0.00437826	0.958786	0.991247
DUSP5	10	FALSE	NA		-0.14979	0.0503252	0.520864		-0.151179	0.0436587	0.379529		-0.0125661	0.882064	0.970825
REEP5	5	FALSE	NA		-0.0408778	0.0503264	0.520864		-0.00023215	0.992161	0.997659		0.0302037	0.299979	0.733535
RAB9B	X	FALSE	Inactive		-0.13978	0.0503395	0.520864		0.0936491	0.132503	0.551738		0.238928	0.00269046	0.21848
TULP4	6	FALSE	NA		0.0624585	0.050362	0.520864		0.0271214	0.363831	0.738047		-0.0860326	0.0197635	0.383607
DHRS9	2	FALSE	NA		-0.222923	0.0503736	0.520864		-0.153384	0.172561	0.590192		0.150627	0.251624	0.700041
TAGLN2	1	FALSE	NA		-0.0658728	0.050407	0.520864		-0.0337587	0.253779	0.661418		0.0751199	0.0434007	0.477075
OR5B12	11	FALSE	NA		-0.0357356	0.0504113	0.520864		-0.0045154	0.770436	0.934808		0.0357165	0.0655638	0.512308
SEM1	7	FALSE	NA		-0.0263076	0.0504326	0.520864		-0.0267437	0.0322159	0.343981		0.00870998	0.577158	0.880452
HNF4A	20	FALSE	NA		-0.127598	0.05048	0.520864		-0.0120292	0.846984	0.960137		0.206689	0.00513694	0.257016
NECAP1	12	FALSE	NA		0.0334851	0.0504913	0.520864		-0.0126597	0.424401	0.777858		-0.0397242	0.0452327	0.481863
MICA	6	FALSE	NA		-0.120617	0.0505029	0.520864		-0.0817784	0.205895	0.617972		0.0752159	0.323423	0.748443
NIPAL1	4	FALSE	NA		-0.115451	0.0505193	0.520864		-0.0513668	0.371035	0.74375		0.0692768	0.317032	0.74487
GFM1	3	FALSE	NA		-0.032258	0.0506103	0.52125		-0.0128637	0.433323	0.782691		0.0298808	0.135267	0.59505
BCAR3	1	FALSE	NA		-0.106159	0.0506111	0.52125		-0.0598185	0.223551	0.633824		-0.0939595	0.0933048	0.551429
DNAJA1	9	FALSE	NA		-0.0253235	0.050723	0.521393		0.0107865	0.415124	0.773994		0.0329943	0.04198	0.474117
DEFA1	8	FALSE	NA		-0.0872703	0.0507255	0.521393		-0.037986	0.338904	0.721968		0.00873912	0.869947	0.969438
EDDM3B	14	FALSE	NA		-0.0265175	0.050762	0.521393		-0.0258576	0.0668385	0.442838		0.0292424	0.0917601	0.551124
KNTC1	12	FALSE	NA		0.0467859	0.050773	0.521393		-0.0095595	0.650627	0.889827		-0.0394214	0.136124	0.596401
OST4	2	FALSE	NA		-0.0320192	0.0507731	0.521393		-0.0365443	0.0160182	0.268516		0.0324023	0.0827064	0.544642
BRMS1	11	FALSE	NA		-0.0307122	0.0508093	0.521393		-0.0355153	0.0166344	0.269651		0.00996836	0.587364	0.88358
TGIF1	18	FALSE	NA		-0.0749292	0.0508152	0.521393		-0.0342251	0.290983	0.687482		0.0166631	0.666554	0.912537
KRBA2	17	FALSE	NA		0.122067	0.0508717	0.521693		0.00668008	0.91451	0.978456		-0.163741	0.0337152	0.443454
TMEM272	13	FALSE	NA		0.0692882	0.0509482	0.522114		0.0529255	0.0951105	0.495985		-0.00475885	0.9014	0.977254
CDKAL1	6	FALSE	NA		0.0586772	0.0509672	0.522114		0.0848474	0.00215959	0.122891		-0.010016	0.763791	0.938443
NIP7	16	FALSE	NA		-0.0379493	0.0510075	0.522248		-0.0534297	0.0030194	0.139526		0.00757199	0.73244	0.931308
VAC14	16	FALSE	NA		-0.034903	0.0510514	0.52231		-0.0231524	0.160731	0.580553		0.00698631	0.729034	0.930681
DDN	12	FALSE	NA		0.141773	0.051074	0.52231		-0.0269649	0.707055	0.91182		-0.144913	0.090265	0.550984
GRK3	22	FALSE	NA		0.146686	0.0510952	0.52231		0.0364263	0.62391	0.87969		-0.124548	0.172993	0.633065
WDR11	10	FALSE	NA		-0.034465	0.0512358	0.523057		-0.0286015	0.0671829	0.443361		0.00128953	0.945773	0.990208
PSPN	19	FALSE	NA		0.0812343	0.0512542	0.523057		0.0590106	0.136398	0.555657		-0.023113	0.637539	0.903177
TRIM11	1	FALSE	NA		0.0326446	0.0512645	0.523057		0.0212981	0.16743	0.585586		-0.000147142	0.99398	0.998983
TRIM60	4	FALSE	NA		-0.0272749	0.051356	0.523057		-0.0264192	0.0593477	0.426738		0.030244	0.0792838	0.53921
TNFSF9	19	FALSE	NA		-0.181266	0.0513933	0.523057		-0.0908883	0.29505	0.690857		0.105242	0.342612	0.763984
CELA3B	1	FALSE	NA		-0.0425404	0.0514	0.523057		-0.0310728	0.179151	0.595277		0.0799756	0.00495456	0.257016
RSPO3	6	FALSE	NA		-0.124453	0.0514146	0.523057		-0.0414498	0.499339	0.81895		0.0772889	0.333584	0.756378
ST8SIA1	12	FALSE	NA		0.186708	0.0514369	0.523057		-0.0279131	0.771457	0.934975		-0.205226	0.063992	0.510737
KRT85	12	FALSE	NA		-0.0527052	0.051473	0.523057		-0.0141509	0.50837	0.823305		0.0627116	0.0200122	0.384158
BPTF	17	FALSE	NA		0.0325554	0.0514903	0.523057		0.00395901	0.794721	0.942206		-0.0275695	0.138794	0.600014
ATG13	11	FALSE	NA		0.0295877	0.0515085	0.523057		-0.00136246	0.925221	0.981276		-0.0627803	0.00045049	0.0939039
PPME1	11	FALSE	NA		0.0371444	0.0515282	0.523057		-0.00372841	0.834961	0.956553		-0.0239479	0.292773	0.729295
HMGXB3	5	FALSE	NA		0.0333103	0.051569	0.523057		0.0114982	0.481116	0.810889		-0.0318876	0.114996	0.575993
CMC4	X	FALSE	Inactive		-0.0706677	0.0515691	0.523057		-0.00522769	0.876825	0.967567		0.0660075	0.100921	0.564929
CATSPERZ	11	FALSE	NA		-0.146513	0.0516307	0.523057		-0.146564	0.0514061	0.40399		-0.0116088	0.901667	0.977445
SPATS2L	2	FALSE	NA		-0.0907145	0.0516436	0.523057		-0.070016	0.0729876	0.456666		0.016846	0.717321	0.927003
SAMD4A	14	FALSE	NA		-0.14624	0.051708	0.523057		-0.0615989	0.407761	0.770103		-0.0190818	0.817293	0.953049
CEP44	4	FALSE	NA		0.0589055	0.0517502	0.523057		0.0373087	0.178814	0.595178		-0.0340716	0.308996	0.739084
ITGA1	5	FALSE	NA		-0.192851	0.051756	0.523057		0.0226171	0.799974	0.944197		0.0354498	0.738085	0.93252
ZNF507	19	FALSE	NA		0.039847	0.0517622	0.523057		0.0186921	0.435266	0.78344		-0.0116981	0.698915	0.922602
MINPP1	10	FALSE	NA		-0.0836845	0.0517757	0.523057		-0.0493753	0.212793	0.624477		0.0653446	0.183862	0.643444
ASRGL1	11	FALSE	NA		0.171618	0.051789	0.523057		0.0101569	0.895749	0.972713		-0.0678073	0.530073	0.861312
PTPRZ1	7	FALSE	NA		0.184561	0.0517957	0.523057		-0.0531114	0.622403	0.879056		-0.17694	0.143985	0.606612
FBXW8	12	FALSE	NA		0.0526245	0.051846	0.52329		-0.0204168	0.423084	0.777138		-0.0920553	0.00346516	0.24156
JAM3	11	FALSE	NA		0.156035	0.0519267	0.523467		0.0200554	0.803091	0.945651		0.0161821	0.875364	0.970066
SUGP2	19	FALSE	NA		0.0322267	0.0519562	0.523467		0.0280959	0.0789213	0.467888		0.00717405	0.71436	0.926202
PCTP	17	FALSE	NA		-0.0793771	0.051977	0.523467		0.0188671	0.649336	0.889197		0.0712985	0.134285	0.59505
NMT2	10	FALSE	NA		-0.0845476	0.0519998	0.523467		-0.0458101	0.258244	0.664633		0.0350783	0.475347	0.834544
NBAS	2	FALSE	NA		0.0421833	0.0520078	0.523467		-0.011734	0.543414	0.8446		-0.0373145	0.118953	0.578094
RMDN2	2	FALSE	NA		-0.105027	0.0520273	0.523467		-0.027216	0.624795	0.87969		0.0676756	0.309857	0.7399
PSMC1	14	FALSE	NA		-0.0197822	0.0521324	0.524249		-0.0262887	0.0136834	0.25789		0.00216553	0.869739	0.969438
TUSC1	9	FALSE	NA		-0.218493	0.0522048	0.524702		0.134566	0.219692	0.629966		0.134591	0.30458	0.736331
RFLNB	17	FALSE	NA		-0.175352	0.0522678	0.52506		-0.0555451	0.558086	0.851616		0.165533	0.118479	0.577667
USPL1	13	FALSE	NA		0.0486519	0.0523187	0.525296		0.0271517	0.250072	0.658198		-0.0120095	0.675325	0.914922
GIP	17	FALSE	NA		-0.0823967	0.0524491	0.525674		-0.027412	0.504119	0.82089		0.0482064	0.350216	0.769982
URB1	21	FALSE	NA		0.0544538	0.052457	0.525674		0.0427329	0.0983051	0.501303		-0.035245	0.263385	0.70873
BAZ2A	12	FALSE	NA		0.0327801	0.0524615	0.525674		-0.0110942	0.492046	0.816189		-0.0564382	0.00496191	0.257016
BCO1	16	FALSE	NA		-0.123022	0.0525071	0.525674		-0.019587	0.761322	0.931041		0.216416	0.00340228	0.24156
RPTN	1	FALSE	NA		-0.0756344	0.0525215	0.525674		-0.0475117	0.233902	0.645495		0.0852716	0.0770485	0.534736
PAGE2	X	FALSE	NA		-0.170217	0.0525436	0.525674		-0.0841382	0.272479	0.673801		0.0892878	0.394212	0.794984
HELZ	17	FALSE	NA		0.0472445	0.0525482	0.525674		0.023983	0.287882	0.685005		-0.0450329	0.101851	0.565025
MCMBP	10	FALSE	NA		-0.029929	0.0526609	0.52644		-0.0187606	0.185556	0.600778		0.0249338	0.150821	0.610492
CHD6	20	FALSE	NA		0.0476806	0.0526797	0.52644		0.0203062	0.390452	0.756868		-0.0518743	0.0775164	0.535822
FAHD2A	2	FALSE	NA		0.0415109	0.0527196	0.526561		-0.0115015	0.568907	0.85513		-0.0509261	0.0433232	0.477075
USP54	10	FALSE	NA		0.0722964	0.0527467	0.526561		0.00595382	0.843581	0.95917		-0.09548	0.0134744	0.340288
HSFY2	Y	FALSE	NA		0.0317475	0.0527793	0.526612		0.0340905	0.0138666	0.258425		0.0223108	0.183741	0.643444
CHRNG	2	FALSE	NA		0.0492361	0.0529475	0.527855		-0.0300022	0.284874	0.682414		-0.0740592	0.0333988	0.442041
E2F6	2	FALSE	NA		0.0370167	0.0529589	0.527855		-0.00496765	0.782288	0.938031		-0.0519329	0.0186297	0.374489
SPRING1	12	FALSE	NA		0.0422806	0.0530207	0.528037		-0.0160442	0.426771	0.779224		-0.0338469	0.188859	0.646626
CREB3L1	11	FALSE	NA		-0.235892	0.0530691	0.528037		-0.0657745	0.598475	0.869335		0.204096	0.175081	0.636017
STC2	5	FALSE	NA		-0.192649	0.0530913	0.528037		-0.0885229	0.335163	0.719086		-0.0619764	0.599913	0.888861
MCFD2	2	FALSE	NA		-0.0326833	0.0531314	0.528037		-0.021543	0.189663	0.605218		-0.0148061	0.456287	0.826153
PNMA1	14	FALSE	NA		0.054256	0.0531364	0.528037		-0.0320323	0.210234	0.62181		-0.0643396	0.0480506	0.483971
ZNF75D	X	FALSE	Inactive		-0.062317	0.0531473	0.528037		0.0331263	0.305569	0.698886		0.0578593	0.134152	0.59505
ZNF326	1	FALSE	NA		-0.0319719	0.0531699	0.528037		0.00430437	0.787941	0.93914		0.037217	0.0570432	0.499669
GM2A	5	FALSE	NA		-0.0645265	0.053237	0.528257		-0.0199944	0.552998	0.849408		0.0578886	0.145829	0.607298
KALRN	3	FALSE	NA		-0.165639	0.0532635	0.528257		0.115686	0.171516	0.589383		0.373505	0.000347878	0.0860395
ZMPSTE24	1	FALSE	NA		-0.0342732	0.0532747	0.528257		-0.0207231	0.195889	0.609947		0.019722	0.317447	0.745308
FOXD4L4	9	FALSE	NA		-0.0627751	0.0533888	0.529039		0.00713485	0.798311	0.943673		0.0209018	0.575739	0.879734
LIPA	10	FALSE	NA		-0.0798001	0.0534385	0.529039		-0.0251113	0.558522	0.851745		0.0241787	0.640738	0.904377
KRT7	12	FALSE	NA		-0.187504	0.0535222	0.529039		-0.0768166	0.384525	0.754625		-0.0582399	0.55788	0.872911
CCDC69	5	FALSE	NA		-0.13945	0.0535246	0.529039		0.0520041	0.544091	0.845203		0.0883306	0.306272	0.737044
SP4	7	FALSE	NA		0.0769177	0.0535573	0.529039		0.0433658	0.258052	0.664607		-0.0823056	0.080484	0.541224
IFT22	7	FALSE	NA		-0.0474153	0.05358	0.529039		-0.0396468	0.0870927	0.484531		0.0420082	0.144171	0.606612
TPRN	9	FALSE	NA		0.0585334	0.0535927	0.529039		0.0561806	0.0389318	0.362425		-0.00777134	0.820396	0.953961
CDK12	17	FALSE	NA		0.0355357	0.0536011	0.529039		0.0264805	0.12333	0.538993		-0.0244463	0.248289	0.698467
EHD3	2	FALSE	NA		-0.162158	0.0536245	0.529039		-0.117941	0.165853	0.584447		0.0681425	0.500741	0.844962
BCHE	3	FALSE	NA		0.285076	0.0536413	0.529039		0.0501357	0.721485	0.91715		-0.406186	0.0133432	0.34027
IFNA5	9	FALSE	NA		-0.0262113	0.0536711	0.529039		-0.00865881	0.486901	0.81385		0.0296731	0.0547046	0.497195
KRTAP8.1	21	FALSE	Inactive		-0.0237352	0.0536958	0.529039		-0.0210332	0.0757594	0.462339		0.00921626	0.529968	0.86128
LRIG1	3	FALSE	NA		0.166803	0.0537226	0.529039		0.20541	0.020708	0.292367		-0.0334327	0.758516	0.936583
FAM229A	1	FALSE	NA		0.11177	0.0537398	0.529039		0.119173	0.0336721	0.346599		-0.0322191	0.642878	0.904772
ACAA1	3	FALSE	NA		-0.0371763	0.0538522	0.52938		-0.00604279	0.75836	0.930221		0.0683356	0.00479012	0.256291
CYP7A1	8	FALSE	NA		-0.0280859	0.0538708	0.52938		-0.0143818	0.327926	0.714762		0.0229196	0.209432	0.665505
ENTPD7	10	FALSE	NA		-0.0844212	0.0538739	0.52938		-0.0340303	0.36913	0.742714		0.0811123	0.0908649	0.550984
NSD3	8	FALSE	NA		0.0351003	0.0538849	0.52938		0.0268723	0.128812	0.546854		-0.00956356	0.659939	0.910324
WDR17	4	FALSE	NA		0.164695	0.0539409	0.529659		0.0180507	0.836478	0.957236		-0.0781589	0.468214	0.830357
BOLA2.SMG1P6	16	FALSE	NA		-0.0383496	0.0539831	0.529802		-0.0482424	0.0115521	0.240681		0.00291901	0.900952	0.977191
ACTA2	10	FALSE	NA		-0.182928	0.0540303	0.529994		0.149258	0.134814	0.5547		0.549655	4.7e-06	0.00300536
NDST1	5	FALSE	NA		-0.0600642	0.0541113	0.530517		-0.00590301	0.844486	0.959288		0.0222175	0.548896	0.869905
OGDH	7	FALSE	NA		0.0351558	0.0542459	0.530709		-0.0022294	0.894337	0.972482		-0.0346969	0.100388	0.56393
BRAF	7	FALSE	NA		0.0430556	0.0542722	0.530709		-0.0207697	0.325936	0.713778		-0.0393618	0.136941	0.596982
NENF	1	FALSE	NA		-0.0409809	0.0542812	0.530709		0.0341148	0.0963212	0.496966		0.10938	2.09e-05	0.0105307
DBF4B	17	FALSE	NA		0.0517971	0.0543249	0.530709		-0.0118433	0.622039	0.878941		-0.0966147	0.00120267	0.155835
MYEF2	15	FALSE	NA		0.160828	0.0543385	0.530709		0.1806	0.0216688	0.297667		0.139864	0.261058	0.706797
WNT7A	3	FALSE	NA		-0.120764	0.054362	0.530709		-0.0541579	0.433122	0.782681		0.0117006	0.899901	0.976816
ITGAV	2	FALSE	NA		-0.0598537	0.0543739	0.530709		-0.0214297	0.473679	0.806795		-0.00337034	0.926789	0.984324
GLB1	3	FALSE	NA		-0.0464666	0.0543781	0.530709		-0.0333484	0.126893	0.543903		-0.00384809	0.882767	0.970825
TTC17	11	FALSE	NA		0.030096	0.0543915	0.530709		0.0173642	0.249421	0.657115		-0.0507582	0.006094	0.273076
HJV	1	FALSE	NA		-0.0734053	0.0544245	0.530709		-0.0231541	0.518311	0.828943		0.0492542	0.287844	0.725917
ZNF350	19	FALSE	NA		-0.125054	0.0544537	0.530709		0.0719197	0.31906	0.70883		0.128897	0.123481	0.583199
ATXN7L3B	12	FALSE	NA		-0.0490646	0.0544629	0.530709		-0.00598279	0.792792	0.941385		0.0583036	0.0343323	0.446391
FMN1	15	FALSE	NA		0.179316	0.0545585	0.531283		0.00231718	0.97959	0.995819		-0.336644	0.00100956	0.149777
ZNF615	19	FALSE	NA		-0.111234	0.0545772	0.531283		0.0717499	0.247721	0.656244		0.0881522	0.220088	0.673782
CCNB1	5	FALSE	NA		-0.0318658	0.0546072	0.531305		-0.035734	0.0260579	0.316474		0.0131126	0.512603	0.851836
FAM171B	2	FALSE	NA		0.152668	0.0546356	0.531312		0.0784292	0.301036	0.695259		-0.117151	0.210508	0.666014
RTP3	3	FALSE	NA		-0.0758073	0.0547261	0.531722		-0.0625456	0.164546	0.584256		-0.0473591	0.419747	0.810082
KCNA2	1	FALSE	NA		0.0933371	0.0547332	0.531722		0.00567555	0.899802	0.973699		-0.0236431	0.661173	0.910324
THEGL	4	FALSE	NA		-0.0616002	0.0547997	0.532098		-0.100674	0.00166747	0.1122		-0.0614476	0.135109	0.59505
OR52H1	11	FALSE	NA		-0.024575	0.0548945	0.532593		-0.00960782	0.406777	0.769151		0.030265	0.0351467	0.450654
TMEM94	17	FALSE	NA		0.035225	0.0549654	0.532593		0.0072358	0.67459	0.899732		-0.0179869	0.401387	0.799024
SRP68	17	FALSE	NA		0.0218446	0.0549813	0.532593		0.00656768	0.547029	0.846134		-0.00248829	0.854874	0.965328
SEC61B	9	FALSE	NA		-0.0303997	0.0550797	0.532593		-0.00998065	0.486339	0.813265		0.037573	0.0330794	0.44145
ZNF598	16	FALSE	NA		0.0426531	0.0551414	0.532593		0.0172548	0.412631	0.772078		-0.0350912	0.183712	0.643444
ZC3H7A	16	FALSE	NA		0.0279163	0.0551642	0.532593		0.013704	0.324343	0.713499		-0.0243165	0.153935	0.61395
ADAMTS6	5	FALSE	NA		-0.190231	0.055192	0.532593		-0.0701878	0.453161	0.794889		0.000406778	0.997187	0.999175
H2BC4	6	FALSE	NA		-0.102885	0.0552341	0.532593		-0.108643	0.0472968	0.392815		0.0282817	0.678449	0.915435
NDUFA10	2	FALSE	NA		-0.0289811	0.0552507	0.532593		-0.0345304	0.0126227	0.249592		0.0144859	0.39385	0.79494
POGZ	1	FALSE	NA		0.03566	0.0552511	0.532593		0.00162714	0.924173	0.980991		-0.0433743	0.038854	0.462797
CDC123	10	FALSE	NA		-0.0292433	0.0552568	0.532593		-0.0498383	0.000803236	0.0751398		-0.00600176	0.739471	0.932686
PDE7B	6	FALSE	NA		-0.147547	0.0552739	0.532593		-0.0432886	0.507694	0.823092		0.0522235	0.553868	0.871739
RPAP1	15	FALSE	NA		0.0391221	0.0552751	0.532593		-0.0234715	0.20867	0.620604		-0.0530914	0.0230617	0.398428
GDI2	10	FALSE	NA		-0.0293109	0.0553099	0.532593		-0.0402411	0.00515986	0.172925		0.019918	0.255353	0.702972
ERH	14	FALSE	NA		-0.0290336	0.0553184	0.532593		-0.0195247	0.16574	0.584399		0.0367457	0.0333956	0.442041
CARD10	22	FALSE	NA		-0.119917	0.0554079	0.532593		-0.0553512	0.284789	0.682414		0.0178454	0.793995	0.947767
DCTN2	12	FALSE	NA		-0.0270372	0.0554383	0.532593		-0.0287668	0.0231221	0.302985		0.0181459	0.242632	0.694105
GLP2R	17	FALSE	NA		-0.112633	0.0554517	0.532593		0.0135211	0.809989	0.947079		0.0612982	0.405792	0.802506
RFPL4B	6	FALSE	NA		-0.0947574	0.0554749	0.532593		-0.0555589	0.234379	0.645711		0.04007	0.502473	0.845867
GRIK3	1	FALSE	NA		0.120027	0.0555408	0.532593		0.14061	0.0128385	0.251612		-0.0306543	0.634007	0.901909
WFDC11	20	FALSE	NA		-0.0349788	0.0555416	0.532593		-0.0230201	0.168458	0.585877		0.0301497	0.147357	0.608655
TRAPPC13	5	FALSE	NA		-0.0345004	0.0555426	0.532593		0.00113228	0.948071	0.986498		0.0302838	0.151169	0.610958
[truncated: 17,180 more rows]
