# Supplementary material for: Gene essentiality in cancer cell lines is modified by the sex chromosomes
Source: HighWire-hosted journal article supplement (doi:10.1101/gr.276488.121), 2022-11-01
Supplement: Supplemental_Table_S3.xlsx [file Supplemental_Table_S3.xlsx]

## Sheet: Table S3
Table S3. Essentiality analysis
			XX vs. XY cells				Y effect				X effect
Gene Symbol	Chr.		Fold change (log2) [FC > 0, more essential to XX cells]	P value	FDR		Fold change (log2) [FC > 0, more essential to Y- cells]	P value	FDR		Fold change (log2) [FC < 0, more essential to XX cells]	P value	FDR
DDX3X	X		0.0565618	2.4e-31	4.32e-27		0.0663451	9.53e-62	1.72e-57		0.0111727	0.0196344	0.334676
EIF1AX	X		0.0569413	6.09e-29	5.49e-25		0.0655957	6.11e-55	5.5e-51		0.0132071	0.00864293	0.226337
ZFX	X		0.0199839	2.01e-20	1.21e-16		0.0168783	1.43e-19	8.58e-16		-0.00192712	0.457388	0.876646
RPS4X	X		0.0250331	3.92e-11	1.86e-08		0.0254184	3.53e-18	1.59e-14		0.00377104	0.308818	0.818733
OR10H1	19		-0.0108836	4.64e-16	1.67e-12		-0.0096899	1.84e-15	6.63e-12		0.00283768	0.0365986	0.439598
DAZL	3		-0.0051226	1.54e-11	1.03e-08		-0.00546285	2.8e-15	8.4e-12		0.000375546	0.645516	0.930942
PLCXD1	X		0.00221663	0.0101379	0.237476		-0.0035986	1.03e-06	0.00266025		-0.00743824	1.68e-14	3.04e-10
IL9R	X		0.00295321	0.0104805	0.241777		-0.00455808	1.3e-06	0.00292678		-0.00763451	1.02e-09	1.31e-06
PRKX	X		0.0023767	0.0489902	0.546875		-0.00467137	5.65e-06	0.0113147		-0.00802755	3.49e-09	3.18e-06
ASMTL	X		0.00108016	0.218112	0.823027		-0.00335805	1.11e-05	0.0200233		-0.00550118	1.47e-08	9.12e-06
ASMT	X		0.00067974	0.494493	0.92433		-0.00370052	1.58e-05	0.0246925		-0.00595386	6.1e-08	2.92e-05
XG	X		0.000568284	0.51962	0.930724		-0.00341093	1.64e-05	0.0246925		-0.0039362	8.73e-05	0.00864
RBM3	X		0.0048148	1.19e-08	2.12e-06		0.00327539	2.54e-05	0.0351354		-0.00317956	0.00120074	0.0642882
KRTAP10.9	21		-0.00213092	0.239201	0.839103		-0.0068401	3.38e-05	0.040549		-0.0022482	0.281638	0.801675
KRTAP12.1	21		-0.00062002	0.424989	0.907166		-0.00294202	3.34e-05	0.040549		-0.00061114	0.492504	0.888348
THBS2	6		-0.00223864	0.0136377	0.289336		-0.00351053	3.93e-05	0.0442041		0.000117214	0.912645	0.986449
HSPA8	11		-0.00321685	0.154909	0.756346		-0.00815145	6.71e-05	0.0711047		0.00043953	0.869102	0.980999
RTL5	X		0.00507443	3.77e-07	3.8e-05		0.00354469	7.31e-05	0.0731328		-0.00349899	0.00227443	0.0994786
KRTAP10.1	21		0.000207115	0.893589	0.991125		-0.00539209	0.000104048	0.0986645		-0.00377097	0.0346218	0.426955
SLC25A6	X		0.00192796	0.0387879	0.499001		-0.00298873	0.000180243	0.151739		-0.00496115	1.7e-06	0.000448875
PSTK	10		-0.00259306	0.347662	0.88285		-0.00971899	0.000181807	0.151739		-0.0035698	0.274631	0.795631
PRIMPOL	4		-0.000637122	0.440254	0.911997		-0.00275456	0.000185283	0.151739		-0.00140244	0.124434	0.662116
CHIC1	X		0.00448543	5.08e-08	7.09e-06		0.00261339	0.000258369	0.179157		-0.00319838	0.000515794	0.0356056
RPL36AL	14		-0.00319996	0.196473	0.801567		-0.0087511	0.000243818	0.179157		-0.00300931	0.311157	0.818733
OR7D4	19		-0.0013375	0.210864	0.81694		-0.00353831	0.000255719	0.179157		0.00120316	0.331817	0.826523
LIPI	21		-0.000536341	0.510759	0.926929		-0.00273449	0.000258538	0.179157		-0.00162371	0.0818785	0.587724
ALKAL2	2		-0.00183151	0.00920169	0.222832		-0.00244912	0.000313992	0.202042		0.000814487	0.329139	0.825368
EXTL2	1		0.000503279	0.622792	0.952633		0.00380653	0.000315894	0.202042		0.00134638	0.281194	0.801119
SKA2	17		-0.000237659	0.82519	0.983783		-0.00333173	0.000325205	0.202042		0.00115427	0.341178	0.830581
STARD8	X		0.00468833	1.46e-06	0.00012023		0.0032798	0.000345425	0.207451		-0.00358149	0.00173487	0.0822555
RAB9B	X		0.00461549	4.59e-10	1.4e-07		0.00229983	0.000406621	0.21049		-0.00218064	0.00855722	0.225403
MORC4	X		0.0044827	2.33e-09	5.45e-07		0.0023874	0.000404779	0.21049		-0.00376722	1.03e-05	0.00164647
IL1RAPL2	X		0.00421162	2.97e-08	4.46e-06		0.0024229	0.000408901	0.21049		-0.00253431	0.00362098	0.135587
LAMA5	20		-0.00173685	0.0769937	0.62727		-0.00312805	0.000391186	0.21049		0.00114854	0.303203	0.814901
SPRY3	X		0.00011227	0.884745	0.989898		-0.00259572	0.000382634	0.21049		-0.00349206	0.000153863	0.0140007
KRTAP10.8	21		-0.000569246	0.574559	0.940089		-0.00344837	0.000451334	0.222518		0.000921161	0.465167	0.879132
PTRH1	9		0.000432964	0.669754	0.961509		-0.00320111	0.000456968	0.222518		-0.00243288	0.0327475	0.416969
PRAMEF18	1		-0.00130308	0.50593	0.926052		-0.00652825	0.000486563	0.230695		-0.000882874	0.705594	0.947109
POLR2K	8		-0.00442869	0.0463921	0.53529		-0.00752428	0.000544893	0.251727		-0.000964368	0.717578	0.949948
IRF7	11		-0.00212847	0.0142035	0.298605		-0.00277771	0.000563307	0.253727		-2.48e-05	0.980133	0.996992
TBC1D10C	11		0.000912145	0.389122	0.894899		0.00360376	0.000579927	0.254843		-7.75e-05	0.949379	0.99385
SEPTIN6	X		0.00151111	0.0428334	0.519153		0.00247981	0.000601775	0.258147		-0.00067029	0.449244	0.875048
FOXO4	X		0.005789	7.42e-09	1.45e-06		0.0029865	0.000708041	0.258363		-0.00438993	0.000161163	0.0144461
ADGRG2	X		0.00388741	2.05e-08	3.24e-06		0.00215671	0.000722455	0.258363		-0.00288375	0.000455208	0.0324169
DISP3	1		-0.00414498	2.63e-06	0.000201744		-0.00272114	0.00073693	0.258363		0.00151721	0.122223	0.658496
MAGEE1	X		0.00325756	0.000109667	0.0055192		0.00273778	0.000709766	0.258363		-0.00243944	0.0163899	0.307281
CSF2RA	X		0.00233651	0.0698107	0.611335		-0.00353592	0.000705735	0.258363		-0.00631959	2.16e-06	0.000532702
RSPH3	6		-0.00122322	0.102321	0.679364		-0.00229942	0.000635575	0.258363		0.000782435	0.356508	0.833362
IL1A	2		0.00155144	0.140005	0.739076		0.00361481	0.000656299	0.258363		-0.000313988	0.805843	0.968483
KRTAP10.11	21		-0.00166224	0.230947	0.835717		-0.0044121	0.000649614	0.258363		-0.000714085	0.661482	0.936208
PIBF1	13		0.000935302	0.297857	0.866887		0.00299666	0.000741175	0.258363		-0.00132224	0.22183	0.765107
UNC93A	6		-0.000663995	0.44801	0.913071		-0.00267295	0.000745678	0.258363		-0.000849036	0.386286	0.846784
CRBN	3		-0.000642111	0.37326	0.892352		-0.0022286	0.000760504	0.258528		2.49e-05	0.976592	0.996818
ZNF670	1		-0.00173252	0.0474415	0.539249		-0.00277185	0.000792791	0.264513		-0.000840163	0.413979	0.859581
MYOM2	8		-0.00146506	0.0784344	0.629673		-0.00258339	0.000832343	0.267791		-0.000299741	0.75299	0.955995
TMEM132E	17		0.000555241	0.540717	0.934138		0.00302958	0.000821236	0.267791		0.00132854	0.227268	0.76934
RUFY1	5		7.18e-05	0.926273	0.994257		-0.00247564	0.000848494	0.268199		-0.00226611	0.0140044	0.288483
NCBP3	17		0.00173016	0.0955283	0.667408		-0.00303816	0.000982525	0.272466		-0.00298978	0.013115	0.278843
LY86	6		-0.000839941	0.232982	0.836729		-0.00214787	0.000944099	0.272466		-0.00045206	0.574594	0.913189
LINGO2	9		-0.000799501	0.29907	0.866887		-0.00248065	0.000945385	0.272466		-0.000262936	0.779211	0.961447
ACVR1B	12		-0.000931068	0.392048	0.894899		0.00362392	0.000924481	0.272466		0.00402229	0.00266094	0.109959
OR2L5	1		-0.00101009	0.402047	0.898798		-0.00366037	0.000959812	0.272466		-0.00274838	0.0435126	0.462217
HSF2BP	21		-0.000475033	0.571072	0.939974		-0.00268595	0.000938615	0.272466		-0.000666156	0.512593	0.895447
MRFAP1	4		0.000311644	0.760812	0.977344		-0.0031386	0.000992595	0.272466		-0.0018742	0.12885	0.667292
COL10A1	6		0.000217403	0.809738	0.981895		0.00281475	0.000998098	0.272466		0.00122445	0.244615	0.777161
IPO4	14		0.000232195	0.865781	0.988952		-0.00360258	0.000995968	0.272466		-0.00389926	0.00509325	0.166582
MTHFD2L	4		0.00174558	0.0717389	0.613824		0.00308339	0.0010387	0.278208		-0.000708803	0.535486	0.90149
CAPRIN1	11		0.0013689	0.425918	0.907166		0.00588728	0.00105002	0.278208		-1.35e-05	0.994783	0.999037
FAM47A	X		0.0059542	1.75e-11	1.03e-08		0.0026239	0.001089	0.284354		-0.00488941	2.44e-06	0.000586343
STK32B	4		-0.00157442	0.0895836	0.654247		-0.00283313	0.00111034	0.285786		-0.000261514	0.807023	0.968516
SEPSECS	4		0.00366885	0.270606	0.856575		-0.00972585	0.00122703	0.311372		-0.00481139	0.226461	0.768848
CXorf58	X		0.00646761	1.59e-12	1.51e-09		0.00253832	0.00131203	0.319764		-0.00544862	1.38e-07	5.78e-05
PFKFB1	X		0.00505152	2.79e-07	2.96e-05		0.00282903	0.00138791	0.319764		-0.00277441	0.016259	0.306422
LTBP1	2		-0.00221297	0.00258522	0.0864309		-0.00219874	0.00138135	0.319764		0.000472973	0.58331	0.914824
SYT10	12		0.00211356	0.0226913	0.385812		0.0031994	0.00131753	0.319764		-0.000555531	0.653784	0.933822
UBE2Q2L	15		-0.00299585	0.201795	0.807283		-0.00739419	0.00140208	0.319764		-0.00355999	0.212213	0.758319
VAMP7	X		0.000348141	0.672865	0.962237		-0.00248315	0.00138062	0.319764		-0.00323082	0.000844641	0.0510668
AKNAD1	1		0.000312236	0.678734	0.963196		0.00235449	0.00131282	0.319764		0.000879306	0.330517	0.825728
GIMAP8	7		-4.85e-05	0.956861	0.996356		-0.00263274	0.0013591	0.319764		-0.000828318	0.424616	0.865177
PCYT1B	X		0.00467915	3.94e-10	1.27e-07		0.00197289	0.00173677	0.327061		-0.00385945	1.94e-06	0.000491278
PJA1	X		0.00437561	2.69e-09	6.22e-07		0.00214599	0.00155516	0.327061		-0.0027617	0.00145268	0.0733135
EBP	X		0.00426812	8.74e-07	7.79e-05		0.00264799	0.00168165	0.327061		-0.00299304	0.00562598	0.17783
TRO	X		0.00260158	0.000173744	0.00841493		0.00212978	0.00154941	0.327061		-0.000749527	0.367216	0.838504
CLOCK	4		0.00126924	0.0450452	0.530443		0.00195051	0.00164272	0.327061		-0.000177264	0.816945	0.970867
CPSF4L	17		-0.00141808	0.0709224	0.613824		-0.00236742	0.00162268	0.327061		0.000797208	0.391056	0.848262
AKAP17A	X		0.00220372	0.113689	0.703994		-0.00368538	0.00158192	0.327061		-0.00681961	5.41e-06	0.000984657
FUZ	19		-0.00109331	0.300299	0.866887		-0.00285393	0.00168705	0.327061		-0.00065379	0.571938	0.912134
KIR3DL2	19		-0.00116315	0.297424	0.866887		-0.00324334	0.00174506	0.327061		2.32e-06	0.99857	0.999402
VWA8	13		-0.000809754	0.395231	0.895301		-0.00270285	0.0014593	0.327061		-0.00226444	0.0309212	0.405365
SMARCAL1	2		0.00112636	0.434404	0.910477		-0.00351978	0.00170395	0.327061		-0.00131381	0.361361	0.83567
AVPI1	10		0.000642129	0.456605	0.915665		0.00264603	0.0016993	0.327061		0.00282938	0.0091774	0.231582
DNAI3	1		0.0005792	0.515945	0.928742		0.00279548	0.00167434	0.327061		0.00158384	0.138007	0.678992
PITRM1	10		-0.0012218	0.520374	0.930724		0.00705339	0.00170666	0.327061		0.00587932	0.024459	0.368152
DCLK3	3		0.000407179	0.623247	0.952633		0.00253111	0.00176083	0.327061		0.000303017	0.758588	0.957894
PMPCA	9		0.00106594	0.651279	0.955589		0.00727182	0.00162469	0.327061		0.00519623	0.0688417	0.554565
SAFB	19		-0.000470491	0.72005	0.970801		-0.00373677	0.00156638	0.327061		0.000409931	0.789915	0.965566
METTL26	16		0.000176706	0.821534	0.983293		-0.00222923	0.00160897	0.327061		-0.000333579	0.711907	0.94814
ABCC8	11		-0.00132333	0.108509	0.692392		-0.00242232	0.00183783	0.334787		0.000851171	0.382152	0.844442
APC2	19		0.000290178	0.739104	0.974462		-0.00250136	0.00183959	0.334787		-0.00255368	0.0119812	0.26519
OR1E1	17		-0.00154779	0.0350535	0.478455		-0.00210348	0.00190766	0.336964		-3.05e-05	0.971342	0.996589
LPIN1	2		-0.00113136	0.123632	0.715513		-0.0020681	0.0018989	0.336964		0.000377837	0.65152	0.932655
PPEF2	4		-0.000683181	0.425261	0.907166		0.00256283	0.0018727	0.336964		0.000747931	0.457456	0.876646
GAMT	19		-0.00138562	0.192031	0.797593		-0.00298922	0.00197507	0.345484		-0.000157387	0.896848	0.981985
PNPLA4	X		0.00289329	0.000311703	0.0140399		0.00221425	0.0020833	0.357474		-0.00256286	0.00514383	0.167012
SNCB	5		-0.00122421	0.112035	0.700022		-0.0022605	0.00207102	0.357474		0.00012637	0.890547	0.981594
MAP6	11		0.00222348	0.0168551	0.329727		0.00265146	0.0021271	0.361546		0.000224366	0.84036	0.973888
DLGAP2	8		-0.00107962	0.195603	0.801567		-0.0023891	0.00214869	0.361802		-0.000756569	0.432759	0.868403
CAVIN1	17		-0.00117929	0.229857	0.835604		-0.00275168	0.00217001	0.36201		-0.000421381	0.705288	0.947109
HDAC2	6		-0.00122394	0.288172	0.86457		-0.00311024	0.00223483	0.367337		0.000348591	0.782723	0.961842
UBA7	3		-0.000217114	0.746283	0.975387		0.0019985	0.00224272	0.367337		0.000380424	0.632122	0.927332
ZCCHC13	X		0.00348748	6.68e-05	0.00359258		0.00238064	0.0022683	0.368179		-0.00363394	0.000200501	0.0171205
SLC16A14	2		-0.000764183	0.389354	0.894899		-0.00247925	0.00229323	0.368904		-0.000376552	0.707526	0.947109
CD99	X		0.000295511	0.716264	0.970801		-0.00222915	0.00234132	0.373305		-0.00257871	0.00577966	0.179848
SRSF5	14		-0.00241517	0.108144	0.691718		-0.00408223	0.00238376	0.376435		-0.00208681	0.207469	0.753757
SHOX	X		0.00109334	0.18623	0.792398		-0.00220935	0.0025229	0.376435		-0.00497783	6.49e-08	2.92e-05
PTPN22	1		-0.000893877	0.211111	0.81694		0.00219991	0.00250938	0.376435		0.00170762	0.0505822	0.490496
RBM18	9		0.00227524	0.306106	0.868079		0.00708753	0.00245841	0.376435		0.00121369	0.65032	0.932411
HCN2	19		-0.00108573	0.336444	0.880227		-0.00312858	0.00247343	0.376435		-0.00198185	0.122691	0.659299
PNKP	19		-0.00132977	0.472599	0.920486		-0.00524006	0.0025339	0.376435		-0.00271322	0.221413	0.765073
PPM1D	17		-0.00136443	0.533987	0.933196		-0.00549606	0.00248379	0.376435		-0.00501553	0.030438	0.40247
MDM4	1		-0.000543728	0.803889	0.98088		-0.00515942	0.00254899	0.376435		-0.00425152	0.0483842	0.4796
SGPL1	10		9.46e-05	0.914089	0.993286		-0.00251861	0.00253785	0.376435		-0.000870892	0.414834	0.859597
SEC14L1	17		-0.00174544	0.0813889	0.638681		-0.00280827	0.00260162	0.378283		-0.000367968	0.74851	0.95527
FNDC3B	3		0.00189055	0.110573	0.697679		0.00396846	0.00261502	0.378283		-0.00116617	0.450944	0.875119
ZNF397	18		-0.00110002	0.24623	0.840869		-0.00272848	0.00262448	0.378283		0.00151673	0.197575	0.743806
IZUMO1	19		-0.000757534	0.411917	0.901996		-0.00255271	0.00265111	0.379088		0.000240278	0.823995	0.971542
IRX4	5		-0.00133745	0.140721	0.740787		-0.00252908	0.00282468	0.38849		0.000997848	0.351382	0.833154
TXNRD1	12		-0.00355257	0.322502	0.874546		-0.0101574	0.00276115	0.38849		0.00590087	0.179122	0.725112
PPFIBP2	11		0.000237754	0.751738	0.977053		-0.00208438	0.00280702	0.38849		-0.00104895	0.236735	0.77399
HEXA	15		-0.000111079	0.89244	0.991125		-0.00223822	0.00279233	0.38849		-0.00111694	0.243512	0.777161
ZNF766	19		-6.13e-05	0.943776	0.995283		-0.00234875	0.00274023	0.38849		-0.00111781	0.259141	0.785808
ZNF544	19		-0.000927264	0.194896	0.801168		-0.00200414	0.00284945	0.388928		0.00058012	0.491519	0.888145
TBL1X	X		0.00541303	3.14e-12	2.83e-09		0.00202146	0.00297059	0.396453		-0.00457589	2.35e-07	8.65e-05
RBBP4	1		0.0020648	0.444219	0.912719		0.00777805	0.00295862	0.396453		0.00527802	0.100879	0.625661
TM4SF18	3		0.000545214	0.567529	0.93855		0.00269098	0.00293934	0.396453		0.00121197	0.273361	0.794121
USP9X	X		0.00745582	0.0115005	0.257397		0.00836235	0.00302007	0.400093		0.00337314	0.348172	0.832761
EN2	7		-0.00195203	0.0320448	0.467874		-0.00250378	0.00312551	0.411039		5.67e-05	0.95652	0.994713
PLCD1	3		0.000840476	0.375198	0.892381		0.00270319	0.00317585	0.414633		-0.00120386	0.271495	0.793031
FAM47E	4		-0.000588476	0.392863	0.894899		0.00199535	0.00322274	0.417727		0.00120884	0.147003	0.689423
PCDH19	X		0.0047659	1.08e-07	1.33e-05		0.00228149	0.00327819	0.421374		-0.00492785	6.04e-07	0.00018131
TRIM61	4		0.000679212	0.652886	0.955855		-0.00381568	0.00332103	0.421374		-0.00366161	0.0289557	0.396424
PHF10	6		0.000425452	0.722423	0.971118		-0.00324157	0.00331562	0.421374		-0.00198758	0.165234	0.710682
DIP2A	21		8.86e-05	0.914927	0.993286		-0.00221744	0.00340891	0.429499		-0.00234564	0.0128583	0.276458
DNAH11	7		-0.000588555	0.446402	0.913071		0.00222064	0.00347446	0.43172		0.0013419	0.154726	0.696924
EIF2S2	20		-0.000160267	0.944641	0.995463		-0.00637103	0.00345938	0.43172		0.000366561	0.893631	0.981594
HSPA12B	20		-0.00147918	0.14599	0.74642		-0.0028385	0.00354726	0.434769		-0.000333465	0.781539	0.96184
XDH	2		-0.000352341	0.623902	0.952633		-0.00190626	0.00353138	0.434769		-0.000110203	0.893296	0.981594
HNRNPH2	X		0.00536567	1.75e-09	4.39e-07		0.00214551	0.00377615	0.441785		-0.00393549	5.93e-05	0.00651943
MAGEE2	X		0.00269561	0.00183533	0.0672096		0.00229949	0.00368292	0.441785		-0.00195204	0.0535258	0.503369
MGA	15		0.00289686	0.0390675	0.50027		0.00380279	0.00373988	0.441785		-0.00237783	0.130826	0.670377
SUMO3	21		-0.00131642	0.104641	0.687182		-0.00225552	0.0036328	0.441785		0.000310825	0.746479	0.95527
ZNF256	19		-0.000692096	0.496116	0.924447		-0.00266571	0.00373432	0.441785		-0.00205672	0.071717	0.561669
TEKT5	16		-0.000612013	0.498355	0.924447		-0.00241571	0.00375172	0.441785		-0.000682535	0.525	0.898543
SPATA6L	9		-0.000615255	0.569485	0.939623		-0.00279426	0.00371763	0.441785		-0.00184885	0.124562	0.662211
EEF1E1	6		-0.000466984	0.714919	0.970801		-0.00358036	0.00380832	0.442675		-0.00401182	0.00925523	0.232078
VLDLR	9		-0.00168217	0.0386145	0.498365		-0.00214416	0.00386415	0.444336		2.81e-05	0.975553	0.996694
C16orf78	16		-0.00115263	0.149541	0.751962		-0.00228162	0.0039022	0.444336		0.0014474	0.142398	0.687531
DENND2D	1		-0.000994132	0.339642	0.881015		0.00288338	0.00392126	0.444336		0.00316192	0.0102987	0.248728
CRYGD	2		-0.000798018	0.487268	0.924087		-0.00304601	0.00390676	0.444336		-0.00143579	0.271102	0.792728
SHD	19		-0.00174877	0.0482437	0.543594		-0.00225565	0.00419529	0.461124		-0.000131589	0.8918	0.981594
PRSS22	16		-0.000734013	0.318063	0.87368		-0.00199027	0.00419739	0.461124		-0.000829564	0.339018	0.829981
MCM10	10		-0.000711671	0.622958	0.952633		-0.00383135	0.00412843	0.461124		-0.00268343	0.104985	0.633485
ERBIN	5		-0.00045012	0.633423	0.952633		0.00269376	0.00415868	0.461124		0.00090684	0.42339	0.863995
BIVM	13		-4.87e-05	0.95201	0.996246		-0.00204138	0.00413117	0.461124		-0.00159647	0.0744313	0.569439
SH3BGRL	X		0.00554151	5.08e-13	6.54e-10		0.00185981	0.00423502	0.462439		-0.00347054	6.72e-05	0.0071268
SLC17A1	6		-0.00139435	0.0610822	0.58663		-0.00195956	0.00426345	0.462739		0.00109592	0.203907	0.750053
SF3A1	22		0.00374327	0.192286	0.797891		0.0071507	0.0043501	0.469316		0.00638316	0.0408506	0.454958
LITAF	16		-0.00214746	0.0209322	0.375259		-0.00255992	0.00444424	0.476618		0.00203269	0.0718804	0.56234
SLC7A1	13		-0.00562011	0.00357614	0.11225		-0.00535998	0.00452502	0.478035		-0.00251997	0.23562	0.77399
GPR61	1		0.00151436	0.339431	0.881015		0.00455874	0.00452124	0.478035		0.00109597	0.562062	0.909967
PKDCC	2		-0.000541973	0.524773	0.930955		0.00229909	0.00453705	0.478035		0.00194055	0.056225	0.513955
ASAP2	2		-0.00275471	0.00124783	0.0479801		-0.00241488	0.00457817	0.478362		0.00220308	0.0387852	0.446596
TUBB2B	6		-0.00185305	0.0538396	0.565797		-0.0025605	0.00459325	0.478362		0.000785222	0.490172	0.887837
SCAPER	15		-0.000693798	0.416695	0.903592		-0.00235895	0.004657	0.479458		-0.000655576	0.533585	0.90149
IGSF10	3		-0.000529368	0.488667	0.924262		0.00223069	0.0046306	0.479458		0.000374304	0.695557	0.945516
RPP25L	9		-0.00720844	0.00610184	0.166824		-0.00712609	0.00479357	0.47981		0.00366237	0.227943	0.769505
S100Z	5		-0.000993322	0.27406	0.85733		0.00247123	0.00478445	0.47981		0.0023049	0.0340546	0.422627
DPY30	2		-0.00144599	0.452595	0.914621		-0.00482858	0.00474875	0.47981		-0.00220228	0.306119	0.816605
ZWILCH	15		-0.00113298	0.458612	0.915953		-0.00368361	0.00471653	0.47981		-0.00359461	0.0251103	0.371439
SPHK2	19		-0.000351274	0.701346	0.969143		-0.00243723	0.00469902	0.47981		-0.0010368	0.339326	0.829981
RHOC	1		-0.000683229	0.508754	0.926653		0.00290577	0.00489812	0.484887		0.00262538	0.0341134	0.422627
RPL35A	3		0.000589674	0.845123	0.987163		-0.00760941	0.0048868	0.484887		-0.00288204	0.406197	0.854969
MTHFD1L	6		-0.00235513	0.019403	0.357447		-0.00262529	0.00502653	0.490476		0.00138409	0.233027	0.772767
CEP170	1		0.00066382	0.5305	0.931851		-0.00273071	0.00502937	0.490476		-0.00397034	0.00120248	0.0642882
PRIM1	12		-0.00140481	0.582545	0.941968		-0.00688964	0.00503625	0.490476		-0.00210338	0.501144	0.891727
ARR3	X		0.00365383	1.06e-05	0.000698525		0.00202127	0.00518105	0.495023		-0.00212616	0.0194666	0.334527
YPEL4	11		0.0033985	0.00336233	0.106841		0.00312201	0.0051335	0.495023		-0.0024429	0.0820147	0.587724
EXOC5	14		-0.002061	0.206251	0.810829		-0.00424745	0.00519929	0.495023		-0.00307924	0.0916981	0.60919
SNX33	15		-0.000483891	0.586772	0.943145		-0.00224771	0.00522493	0.495023		-0.000594607	0.558756	0.908282
CFDP1	16		-0.000171448	0.924677	0.994257		-0.00474542	0.00517614	0.495023		-0.00372614	0.0831069	0.589161
ITPA	20		-9.84e-06	0.990122	0.998706		-0.00213864	0.00524779	0.495023		-0.00141412	0.141665	0.687042
SCML1	X		0.00429698	9.82e-09	1.82e-06		0.00186878	0.0052765	0.495139		-0.00379338	1.27e-05	0.00195381
PPP6R2	22		-0.000931702	0.467887	0.918769		-0.00320056	0.00531742	0.496394		-0.000646387	0.657037	0.935519
AGTR2	X		0.00344792	3.88e-05	0.00221838		0.00215824	0.00544879	0.502555		-0.00222882	0.0250069	0.370823
RASD1	17		0.00114435	0.241461	0.839734		0.00258706	0.00546711	0.502555		0.00018028	0.87711	0.981044
LCP1	13		-0.000949641	0.356365	0.887311		-0.00248716	0.00543596	0.502555		-0.00186802	0.0948772	0.615899
TMEM185A	X		0.00457385	5.85e-07	5.46e-05		0.00224853	0.00565971	0.507318		-0.00315311	0.00283476	0.114515
SLC35A3	1		0.0014454	0.122312	0.715513		0.00258433	0.005618	0.507318		-0.000767742	0.485653	0.886461
SOS2	14		0.00123989	0.130745	0.727668		0.00230784	0.00555761	0.507318		-0.00153942	0.126831	0.666796
SOD2	6		-0.000954463	0.797346	0.980044		0.0103716	0.00565222	0.507318		0.00100653	0.820686	0.971402
C2CD4C	19		0.000229681	0.800758	0.980271		-0.00221719	0.00564601	0.507318		-0.00236532	0.0195954	0.334527
PRNP	20		-0.000168546	0.851253	0.987511		-0.00235726	0.00576394	0.514103		-0.00287713	0.00734013	0.206729
CLN8	8		-0.00135575	0.0785988	0.629673		-0.00201996	0.00582235	0.516755		0.000182939	0.839963	0.973888
GDE1	16		-0.00175667	0.0782308	0.629636		-0.00258787	0.00588211	0.516966		0.000153409	0.893679	0.981594
TGM3	20		-0.00126321	0.112848	0.701092		-0.00213661	0.00586596	0.516966		-0.00119793	0.205836	0.751782
SNX12	X		0.00716957	2.57e-10	8.74e-08		0.00263113	0.00601786	0.518847		-0.00506161	0.000102755	0.00992315
GORASP1	3		0.00142056	0.0913679	0.657307		0.00211977	0.00596575	0.518847		-0.000494962	0.605347	0.920821
ZNF674	X		0.00428286	0.0919613	0.659407		-0.00654571	0.0060475	0.518847		-0.00781861	0.00972739	0.241071
CNGB3	8		0.000485045	0.485406	0.92385		0.00206199	0.00604225	0.518847		1.7e-05	0.98529	0.997295
NME9	3		-0.000188585	0.82735	0.983924		0.0023249	0.00593573	0.518847		0.000315938	0.757523	0.957416
FBRSL1	12		-0.00116044	0.177733	0.781635		-0.00212927	0.00615817	0.520251		-0.000167743	0.861864	0.978911
HACD1	10		0.000485405	0.510994	0.926929		0.00198899	0.00617937	0.520251		0.000902419	0.317835	0.820692
SUGCT	7		-0.000459984	0.614067	0.950676		0.00236015	0.00609764	0.520251		-0.000397817	0.702906	0.947063
ATP1B3	3		-0.000524516	0.774782	0.978473		0.00489747	0.00617116	0.520251		0.00264773	0.219181	0.763545
INTS6L	X		0.00570979	1.23e-13	2.22e-10		0.00179949	0.00627046	0.521961		-0.00336118	8.28e-05	0.00832049
TEX13B	X		0.00395785	3.11e-07	3.24e-05		0.00181795	0.00626756	0.521961		-0.00310394	0.000215351	0.0181308
MXRA7	17		0.000980531	0.516936	0.929259		-0.00388347	0.0062866	0.521961		-0.00455961	0.0105686	0.249893
TPO	2		-0.00145901	0.0522605	0.561466		-0.00192244	0.00634086	0.524052		0.000292585	0.738053	0.953551
SYT12	11		0.00296529	0.0162133	0.324025		0.00321415	0.00640379	0.524442		-1.11e-05	0.993962	0.999007
C19orf81	19		-0.000790243	0.386687	0.894143		-0.00229494	0.00639318	0.524442		0.000653233	0.544238	0.904987
TCP10L2	6		-0.000537065	0.57185	0.939974		-0.00227544	0.00655715	0.534571		-0.00117008	0.263408	0.788784
CDKAL1	6		-0.0011049	0.339048	0.881015		-0.00283292	0.0066629	0.538321		-0.000130166	0.920295	0.98755
ZNF701	19		-0.000247423	0.809273	0.981798		-0.00256556	0.00666067	0.538321		-0.0010156	0.395862	0.851074
NLGN3	X		0.00360065	2.1e-05	0.00128774		0.00213569	0.00672172	0.540648		-0.00324072	0.000981665	0.0550986
PABPC5	X		0.00383673	1.93e-08	3.12e-06		0.00164151	0.00698873	0.541193		-0.00305465	7.64e-05	0.00795469
SLITRK4	X		0.00355156	1.32e-06	0.000110685		0.00171582	0.00680486	0.541193		-0.00241616	0.00250263	0.105105
NNAT	20		-0.00151815	0.0366943	0.488634		-0.00188378	0.0070634	0.541193		0.000572871	0.506244	0.893203
DOT1L	19		-0.00328619	0.136417	0.735299		-0.00531758	0.00708894	0.541193		8.1e-05	0.973809	0.9966
KIR3DL1	19		-0.00126179	0.178414	0.781977		-0.00231136	0.00693806	0.541193		-0.000436862	0.686307	0.94348
WWTR1	3		0.00232017	0.329571	0.876836		0.0066527	0.00676665	0.541193		0.000972811	0.73065	0.95248
SEPHS2	16		-0.0020536	0.595733	0.945168		-0.00972662	0.0069775	0.541193		-0.000514022	0.911693	0.986249
TFF1	21		-0.000373474	0.635211	0.952633		-0.00205162	0.00682165	0.541193		-8.9e-05	0.925292	0.989024
PCBP3	21		-0.000347628	0.688637	0.965726		-0.00214773	0.00704234	0.541193		-0.00175461	0.0764518	0.574431
MDM2	12		0.00179657	0.690942	0.966439		-0.00970769	0.00695257	0.541193		-0.014677	0.00173454	0.0822555
LIPG	18		0.000182834	0.830491	0.9843		-0.00219221	0.00708361	0.541193		-0.000867588	0.395818	0.851074
GNAT2	1		-7.05e-06	0.993589	0.998706		0.00236456	0.00699762	0.541193		0.0015429	0.143738	0.687986
VCAM1	1		0.000610375	0.534441	0.933196		0.00256394	0.00716912	0.542152		0.00109236	0.358956	0.834203
TM4SF4	3		0.000590048	0.544624	0.93449		0.00249414	0.00719178	0.542152		0.000288814	0.798755	0.966837
GDF2	10		0.000157698	0.835875	0.984821		0.00213544	0.00718781	0.542152		0.000551898	0.574151	0.913189
GDPD2	X		0.00463686	2.23e-10	7.89e-08		0.00182427	0.00724464	0.543861		-0.00321584	0.000193304	0.0165846
C1orf158	1		-0.00171664	0.034706	0.478455		-0.00209316	0.00729966	0.545477		0.00200394	0.0437224	0.463107
GLYR1	16		0.000685119	0.419475	0.904169		0.00218505	0.00732671	0.545477		0.000588663	0.555281	0.908282
BEX5	X		0.00486015	9.31e-09	1.75e-06		0.001977	0.00748122	0.545981		-0.00245298	0.0113569	0.259882
UBE2R2	9		-0.0037798	0.00846545	0.210957		-0.00371092	0.00758554	0.545981		0.00256453	0.137457	0.678849
GRAMD2A	15		0.00207393	0.0661515	0.604389		-0.00259397	0.00748743	0.545981		-0.00503056	8.18e-05	0.00828635
NRTN	19		-0.00142544	0.0717802	0.613824		-0.00199742	0.00754015	0.545981		0.000348363	0.707717	0.947109
UIMC1	5		-0.00190415	0.0786057	0.629673		-0.00277086	0.00762067	0.545981		-0.00176112	0.155828	0.698434
PRR18	6		-0.000649558	0.435964	0.911226		-0.00202861	0.00766682	0.545981		0.000431901	0.651818	0.932788
OR2T29	1		0.000708115	0.505155	0.925877		-0.00252843	0.00760006	0.545981		-0.00230817	0.0544974	0.506502
SMAD4	18		0.000576627	0.668218	0.961118		-0.00334553	0.00764645	0.545981		-0.00113483	0.481399	0.884761
SLC2A9	4		0.000179906	0.826332	0.983852		-0.00203721	0.00741548	0.545981		-0.000765445	0.433964	0.868528
ZSCAN22	19		-0.00014314	0.878325	0.989362		-0.00226247	0.00755318	0.545981		-0.00138993	0.185665	0.729999
MAP10	1		-9.19e-05	0.9174	0.993733		-0.00210428	0.00741655	0.545981		-0.00126551	0.20278	0.74836
MED13	17		-0.00221199	0.16718	0.766434		-0.0039144	0.00784554	0.552161		-0.000594848	0.745885	0.95527
PTGR2	14		0.000731254	0.27787	0.859702		0.00171036	0.00784187	0.552161		0.000109827	0.890556	0.981594
ZFP42	4		-0.000806992	0.374006	0.892352		-0.00228689	0.00782689	0.552161		-0.000227218	0.832202	0.972432
DZANK1	20		-0.00038083	0.622668	0.952633		-0.00200695	0.00790068	0.553877		0.000228827	0.80937	0.968753
NPAS4	11		0.00210427	0.0800469	0.634494		0.00309675	0.00798325	0.557452		-0.00201289	0.14233	0.687531
IRF5	7		-0.00156967	0.161991	0.759332		-0.00278796	0.00803013	0.557452		-0.000115343	0.929602	0.989984
NSMCE4A	10		-0.00207464	0.19084	0.797026		-0.00396058	0.00804449	0.557452		-0.00102449	0.577074	0.913894
CAPN6	X		0.00505908	1.68e-11	1.03e-08		0.00177289	0.00830671	0.559827		-0.00430877	4.23e-07	0.000136649
SRPX2	X		0.00605304	1.89e-10	6.96e-08		0.00206977	0.00888714	0.559827		-0.00546516	1.54e-07	6.19e-05
NKRF	X		0.00295523	0.00248362	0.0841115		0.00241822	0.00865634	0.559827		-0.00276832	0.0144407	0.290703
NQO2	6		-0.00206204	0.00425377	0.125434		-0.00172007	0.00919279	0.559827		0.000287315	0.722743	0.951297
P2RY14	3		0.00299974	0.00456445	0.133286		0.00253845	0.00827403	0.559827		-0.00244041	0.0436078	0.462561
TMEM177	2		0.00209353	0.0330144	0.471491		0.00248816	0.00892526	0.559827		-0.000848013	0.473095	0.880938
C3orf70	3		0.00188525	0.0358557	0.482458		0.00213179	0.00902049	0.559827		-0.00156715	0.126	0.66501
PLIN4	19		-0.00223912	0.0599493	0.584683		-0.00301802	0.00852488	0.559827		-0.00124857	0.370812	0.839438
PPP1R8	1		0.0053705	0.060301	0.584683		0.007417	0.0086848	0.559827		-0.00230628	0.509245	0.89504
SEPTIN5	22		0.00239045	0.0691766	0.609523		0.00321479	0.00841851	0.559827		-0.000730494	0.630277	0.926694
CHAMP1	13		0.00249373	0.0912548	0.657307		-0.00326041	0.00910589	0.559827		-0.00465678	0.0048571	0.163571
TRABD	22		-0.00169804	0.0949863	0.666674		-0.00261421	0.00863374	0.559827		-0.000408297	0.741449	0.95429
CNBD1	8		-0.00122281	0.111378	0.699441		0.00188043	0.00922842	0.559827		0.0027336	0.00247147	0.104773
P2RY8	X		0.00125953	0.146172	0.74642		-0.00213673	0.00826499	0.559827		-0.005161	4.25e-07	0.000136649
KAT8	16		-0.00325221	0.147682	0.747832		-0.00559027	0.00895871	0.559827		0.000607257	0.819773	0.971227
ZNF133	20		0.00143339	0.17587	0.779305		-0.00241544	0.00812889	0.559827		-0.0029323	0.0134558	0.28275
PADI3	1		-0.00117449	0.195961	0.801567		-0.0022311	0.00870046	0.559827		0.000486118	0.646337	0.93137
HEATR3	16		-0.00174835	0.226591	0.833163		-0.00343003	0.00833952	0.559827		0.000974838	0.558798	0.908282
ZNF587	19		0.00124748	0.252898	0.847348		-0.00244428	0.0092101	0.559827		-0.00295865	0.0149812	0.296611
RBP3	10		0.000977084	0.25579	0.84865		0.00233445	0.00844348	0.559827		-0.000356783	0.744273	0.955024
LSM12	17		-0.00248489	0.270562	0.856575		-0.00549897	0.00839945	0.559827		-0.00719359	0.00427047	0.149691
UBA6	4		0.00166465	0.287138	0.86457		0.0041454	0.00921408	0.559827		0.00181156	0.3282	0.825056
SLC19A1	21		-0.00076126	0.470773	0.919719		-0.0024775	0.00900467	0.559827		-0.00351935	0.00242923	0.103939
B3GNT5	3		0.000615513	0.498796	0.924447		0.0025667	0.00863583	0.559827		-0.00150895	0.183041	0.729453
NEFM	8		-0.000655096	0.497468	0.924447		-0.00252256	0.00857664	0.559827		-0.000701755	0.553871	0.908016
CSH2	17		-0.000888162	0.562914	0.937454		-0.00385351	0.0090788	0.559827		-0.00292063	0.110416	0.641203
ZNF347	19		0.000369876	0.619915	0.951283		-0.00173951	0.00912735	0.559827		-0.00114262	0.171847	0.717859
CD2BP2	16		0.00112706	0.631057	0.952633		-0.00557042	0.00869533	0.559827		-0.000667706	0.810743	0.969222
FCGRT	19		-0.00029762	0.704043	0.969271		-0.00189303	0.00883109	0.559827		-0.0010762	0.230432	0.771404
MLF1	3		0.000211397	0.762444	0.977344		0.0018096	0.00859261	0.559827		0.000273417	0.746738	0.95527
KDR	4		-0.00015624	0.850669	0.987511		0.00225152	0.00920369	0.559827		-0.00051807	0.617819	0.923755
ANTXR2	4		-9.01e-05	0.897873	0.991125		0.00179747	0.0085779	0.559827		0.000538658	0.5225	0.898085
CACNG4	17		-0.00010216	0.907813	0.993143		-0.00204538	0.00922477	0.559827		-0.000759833	0.437344	0.87022
HPS4	22		0.000111398	0.912727	0.993286		-0.00237053	0.00888099	0.559827		-0.00140055	0.225079	0.768622
OR2T35	1		4.36e-05	0.963103	0.996474		-0.0022063	0.00856245	0.559827		-0.00216772	0.0374784	0.442845
PDCL2	4		4.83e-05	0.962806	0.996474		0.0025725	0.00839183	0.559827		0.000688833	0.559267	0.908282
ZIK1	19		-1.43e-05	0.987861	0.998685		-0.00233384	0.00888491	0.559827		0.000689136	0.552162	0.907704
ZDHHC15	X		0.00495104	2.61e-07	2.8e-05		0.00209428	0.00948518	0.560186		-0.00340488	0.00105114	0.0584518
RPA4	X		0.00433318	3.13e-07	3.24e-05		0.0019551	0.009794	0.560186		-0.00319545	0.000914787	0.0533108
ASB12	X		0.00367424	4.52e-05	0.00255507		0.00210179	0.00958378	0.560186		-0.00310095	0.00239234	0.102626
PAGE1	X		0.00279967	0.000189732	0.00911575		0.00173937	0.00955897	0.560186		-0.00274528	0.00117363	0.0637049
XAGE2	X		0.00323922	0.000902288	0.0359657		0.0022862	0.00929024	0.560186		-0.00105308	0.341395	0.830581
TMC6	17		-0.00180956	0.0445976	0.528281		-0.00206644	0.00956838	0.560186		-0.00017466	0.858134	0.97774
TIMM10	11		0.00557835	0.0731438	0.617981		0.00788865	0.00964488	0.560186		0.00151631	0.686494	0.94348
ITGB2	21		-0.00141611	0.0952814	0.666674		-0.0020135	0.00958546	0.560186		0.000146265	0.878893	0.981044
ULK3	15		-0.00159368	0.102116	0.679273		-0.00214966	0.00962407	0.560186		0.00092334	0.373664	0.840907
C1RL	12		-0.00108185	0.162521	0.76075		-0.00185781	0.0096946	0.560186		-0.000242091	0.785857	0.963755
KCND3	1		0.00134898	0.254198	0.848031		0.00294211	0.00973872	0.560186		0.000210307	0.878099	0.981044
ELK3	12		0.000936769	0.385546	0.893996		0.00272748	0.00957757	0.560186		-0.000529453	0.677674	0.942031
RTKN2	10		0.00078675	0.397247	0.89678		0.00237312	0.00954098	0.560186		0.000637492	0.579641	0.914026
RPRD2	1		0.00110695	0.507292	0.926052		0.00422097	0.00938378	0.560186		0.00174689	0.375025	0.840907
CYB561D1	1		-0.000589747	0.520876	0.930724		0.00252854	0.00977701	0.560186		0.00243998	0.0392214	0.447478
PPP2R3B	X		0.000465711	0.570592	0.939974		-0.00200331	0.00978116	0.560186		-0.00362935	0.00018463	0.0161811
KBTBD12	3		-0.000348854	0.683535	0.964485		0.00212125	0.00949321	0.560186		0.000401138	0.691393	0.944291
OR1E2	17		0.000264861	0.814936	0.98314		-0.0025654	0.00948471	0.560186		-0.00141429	0.265241	0.789148
WDR25	14		-0.000803252	0.572884	0.939974		-0.0033056	0.00996118	0.567945		-0.000694898	0.662699	0.93684
NSFL1C	20		0.00016378	0.877084	0.989112		-0.00235387	0.00999447	0.568045		-0.00264885	0.0220952	0.354574
TNMD	X		0.00299141	4.92e-06	0.000347463		0.00143718	0.0100973	0.568667		-0.00135107	0.0542039	0.505482
FHL1	X		0.00228304	0.000481407	0.0205047		0.00153714	0.0100586	0.568667		-0.00148428	0.0443514	0.463772
EPGN	4		-0.000127436	0.86318	0.988693		0.00184723	0.0101001	0.568667		0.000518881	0.554235	0.908088
OR1L8	9		-0.0015323	0.0550058	0.569563		-0.00186479	0.0101906	0.568879		0.00034458	0.698872	0.945919
KIR2DL1	19		-0.00157889	0.176794	0.78028		-0.0027861	0.0101986	0.568879		-0.00079301	0.551715	0.907372
HSPA12A	10		0.000442747	0.472455	0.920486		0.00148385	0.0101752	0.568879		0.000402612	0.574989	0.913189
PRAF2	X		0.00716324	3.58e-15	1.08e-11		0.00195878	0.010532	0.569274		-0.00607431	6.81e-09	5.11e-06
GRIA3	X		0.00371602	9e-07	7.91e-05		0.00169385	0.0103647	0.569274		-0.00264391	0.00182547	0.0854891
IFITM3	11		-0.00668933	0.011083	0.251449		-0.00669706	0.0104231	0.569274		0.000973774	0.761511	0.958405
KLHL24	3		-0.0011486	0.131652	0.727668		0.00194417	0.0103293	0.569274		0.000615312	0.498709	0.891245
ZNF773	19		-0.00119739	0.179234	0.782797		-0.00201291	0.0105848	0.569274		-0.000324355	0.743274	0.9548
CYP1A1	15		-0.00110096	0.249669	0.844115		-0.00220509	0.0105713	0.569274		-0.00124311	0.241989	0.777161
RPUSD1	16		-0.000503875	0.476884	0.922034		-0.001755	0.0104879	0.569274		-0.000639749	0.452457	0.875226
CHD2	15		-0.000543688	0.582283	0.941966		-0.00229204	0.0104601	0.569274		-0.00136539	0.218819	0.763545
USE1	19		-0.00066899	0.728439	0.971929		-0.00466674	0.0102968	0.569274		-0.000577727	0.798911	0.966837
ID2	2		-0.000164104	0.87566	0.988952		-0.00272597	0.0105532	0.569274		-0.00316128	0.0163405	0.306994
OR2B6	6		-0.000104403	0.912761	0.993286		-0.00227378	0.0104658	0.569274		-0.000538971	0.641324	0.929552
RAMAC	15		7.5e-05	0.940813	0.995164		-0.00237818	0.0103136	0.569274		0.000818953	0.496548	0.890579
MAGEB10	X		0.00408619	1.21e-05	0.00078407		0.00217468	0.0110506	0.570472		-0.00372793	0.000586042	0.0391064
SLC17A2	6		-0.00137859	0.0320606	0.467874		-0.001504	0.0107934	0.570472		0.000148706	0.839722	0.973888
SZRD1	1		0.00235966	0.0358016	0.482458		0.00259869	0.0111054	0.570472		-0.000374027	0.769624	0.960534
NWD2	4		0.00150263	0.050492	0.555922		0.00199121	0.0108967	0.570472		-0.00103587	0.290964	0.807975
CRCP	7		0.00448316	0.114235	0.704853		0.00669168	0.0109622	0.570472		-0.00105521	0.746418	0.95527
SF3B2	11		0.00371145	0.132785	0.728941		0.00622369	0.0107779	0.570472		-0.00259353	0.387546	0.84732
GSS	20		-0.000980172	0.258873	0.851712		-0.00209678	0.0111076	0.570472		0.00092403	0.370917	0.839438
BOD1	5		0.00102025	0.358896	0.888009		-0.00258238	0.0111632	0.570472		-0.00356494	0.0060395	0.186006
OR13G1	1		-0.000806949	0.362766	0.889685		-0.00203059	0.0107056	0.570472		-0.000853963	0.38628	0.846784
UBAC1	9		-0.000903348	0.376083	0.892829		-0.00248594	0.010722	0.570472		-0.00061715	0.607656	0.921112
RNF24	20		-0.000749313	0.380313	0.892945		-0.00194373	0.0108882	0.570472		-0.00101212	0.282024	0.801843
NDRG4	16		0.000604929	0.464288	0.918264		0.00196762	0.0110722	0.570472		0.000499322	0.606923	0.921112
FAHD2B	2		-0.000672377	0.467101	0.918769		-0.00213162	0.011177	0.570472		0.000877245	0.423033	0.863805
POT1	7		-0.00162748	0.5813	0.941686		-0.00734166	0.0108196	0.570472		-0.0050395	0.161379	0.706632
GANC	15		-0.000156628	0.834116	0.984514		0.00181659	0.0106406	0.570472		-0.000569594	0.50458	0.892727
SLX4	16		-0.000209251	0.867268	0.988952		-0.00278717	0.011133	0.570472		-0.00084025	0.548306	0.905748
OR2M3	1		-7.95e-05	0.939265	0.995046		-0.00243127	0.0109249	0.570472		-0.00222902	0.060618	0.528632
ST8SIA1	12		-1.52e-05	0.985781	0.998584		0.00227988	0.0110856	0.570472		6.49e-05	0.952819	0.994409
CDHR4	3		-0.000267815	0.769534	0.978235		0.00219605	0.0112136	0.570721		0.00146817	0.170376	0.716373
UGT2B28	4		0.000179573	0.821199	0.983271		0.00190751	0.0112454	0.570728		0.000524749	0.56915	0.911851
AKAP14	X		0.00335765	8.99e-07	7.91e-05		0.00158824	0.0114326	0.57096		-0.0020192	0.0104967	0.249885
PRPS1	X		0.00281577	0.000368694	0.0162813		0.00195812	0.0113854	0.57096		-0.00261754	0.0066225	0.195603
BCAS2	1		0.0034311	0.0747778	0.622632		0.00471435	0.01129	0.57096		0.000649362	0.774678	0.961147
PSMB5	14		0.00646783	0.121428	0.714523		0.0104622	0.0115556	0.57096		0.00140431	0.778076	0.961374
ASIC3	7		0.00082127	0.345994	0.881597		-0.00215019	0.0115669	0.57096		-0.00201146	0.0614434	0.531457
TRIML1	4		-0.000689731	0.356217	0.887311		-0.00176783	0.0115403	0.57096		-0.000332449	0.709453	0.947265
STRIP1	1		-0.00165532	0.392055	0.894899		0.00488671	0.0115259	0.57096		0.00430326	0.0650899	0.545128
C1orf52	1		-0.000571905	0.528757	0.931238		0.00233215	0.0115361	0.57096		0.00190185	0.0833186	0.58929
ABCA4	1		0.000161491	0.870907	0.988952		0.00252851	0.0115057	0.57096		0.000376636	0.749289	0.955363
SURF4	9		1.37e-05	0.993317	0.998706		-0.00363389	0.011446	0.57096		-0.00401643	0.0234283	0.363463
NCAPD2	12		0.00174397	0.32995	0.877042		-0.0042457	0.0116023	0.571145		-0.00271061	0.212173	0.758319
KLRB1	12		-0.00179358	0.0374641	0.493682		-0.00195325	0.0116517	0.572015		0.000895832	0.349103	0.833084
GSTO2	10		0.00224586	0.00658295	0.175711		0.00202712	0.01179	0.573592		-0.00174825	0.0804914	0.585708
FBXO7	22		0.00301769	0.086038	0.645957		-0.00358759	0.0118115	0.573592		-0.00318124	0.0903006	0.605451
SSPN	12		0.000633376	0.526224	0.93104		0.00267624	0.011762	0.573592		0.000220776	0.865769	0.98059
DACH1	13		-0.000470151	0.690262	0.966238		-0.00266547	0.0118431	0.573592		-0.00124852	0.347536	0.832357
SLC30A6	2		0.000158793	0.802599	0.980293		-0.00145277	0.0117513	0.573592		-0.000339292	0.645149	0.930725
SPEG	2		-0.000496667	0.620309	0.951432		-0.00228763	0.0119047	0.575034		-0.00153884	0.173994	0.719167
DCAF8L2	X		0.00397824	1.86e-07	2.15e-05		0.00169267	0.012092	0.575569		-0.00400476	3.7e-06	0.000776121
PABIR2	X		0.00318498	1.06e-06	9.04e-05		0.00142862	0.012442	0.575569		-0.00271248	0.000186292	0.0162146
SLC25A28	10		0.00902437	2.17e-05	0.00132063		0.00489227	0.0125251	0.575569		-0.00786945	0.00142292	0.0722162
ITGB1BP2	X		0.00330551	2.51e-05	0.0015072		0.0017508	0.0126178	0.575569		-0.00252829	0.0052815	0.16962
RPS29	14		-0.00836299	0.00219633	0.0774034		-0.00647608	0.0125586	0.575569		0.00207114	0.517351	0.897624
OR8S1	12		-0.00235098	0.0106621	0.24409		-0.00212942	0.0122179	0.575569		0.000295137	0.776926	0.961374
GPRIN1	5		-0.00156504	0.0470288	0.537628		-0.00186614	0.0120811	0.575569		0.000453308	0.629754	0.926541
FNDC1	6		-0.00123995	0.156073	0.75656		-0.0021715	0.0121814	0.575569		0.000807216	0.458255	0.876752
LUC7L	16		-0.001011	0.227537	0.834425		-0.00202687	0.0121166	0.575569		-0.000946875	0.33639	0.829371
ABI1	10		0.00120727	0.230822	0.835717		0.00256164	0.0120522	0.575569		-0.000924771	0.455246	0.87646
RASSF6	4		-0.000765426	0.302879	0.86732		0.00182055	0.0126186	0.575569		0.0012465	0.16387	0.70898
RNASEH2A	19		-0.00221762	0.336939	0.880807		-0.00516222	0.0125953	0.575569		0.000105761	0.96798	0.996589
TLX1	10		0.000649596	0.396129	0.895909		0.00171568	0.0124835	0.575569		-0.000860601	0.309109	0.818733
ZNF124	1		-0.000841951	0.409452	0.901434		-0.0023333	0.0124332	0.575569		-0.000173942	0.882222	0.981594
GABRB3	15		0.000524123	0.448965	0.913071		0.00169569	0.0121584	0.575569		0.000904851	0.288767	0.807411
IL37	2		0.000337871	0.639459	0.953323		0.00181856	0.0121032	0.575569		0.000201091	0.82012	0.971345
SECISBP2	9		-0.000531265	0.651688	0.955648		-0.00272526	0.0123336	0.575569		0.000173998	0.899752	0.982501
SGO2	2		-0.000341949	0.808473	0.981686		-0.00332775	0.0125702	0.575569		-0.00127877	0.439521	0.871737
RLF	1		-0.000116793	0.909339	0.993286		-0.00227746	0.0125332	0.575569		-0.00125463	0.271583	0.793031
CHGB	20		-3.77e-05	0.969977	0.997247		-0.00239251	0.0125265	0.575569		-0.00146413	0.223409	0.766597
KRTAP4.2	17		-4.02e-05	0.982942	0.998457		-0.00442963	0.0123061	0.575569		-0.00514332	0.019569	0.334527
PANK2	20		1.64e-05	0.98282	0.998457		-0.00178126	0.0122804	0.575569		-0.000766654	0.395959	0.851074
KIAA1210	X		0.00366014	1.91e-06	0.00015059		0.00170799	0.0129582	0.57789		-0.0023916	0.00636851	0.192519
ARMCX2	X		0.00447684	2.54e-06	0.000196451		0.0019896	0.012934	0.57789		-0.00454542	1.51e-05	0.00224124
PCDHB12	5		-0.00251256	0.0024165	0.0827719		-0.00190949	0.0127033	0.57789		0.000836389	0.375942	0.841243
PLXNB2	22		-0.00184512	0.0391988	0.500883		-0.00206011	0.012887	0.57789		-0.00035779	0.726323	0.951496
SPEN	1		-0.00251028	0.0575294	0.581001		-0.00295926	0.0129493	0.57789		-1.68e-05	0.990815	0.998158
ASF1A	6		0.00236226	0.157328	0.757776		0.00400991	0.0128612	0.57789		0.000137191	0.945427	0.99328
H1.3	6		-0.000770765	0.550424	0.935436		-0.00299234	0.0128701	0.57789		-0.00167138	0.271391	0.793031
PLPP2	19		-0.000530183	0.561081	0.937454		-0.00204475	0.0129386	0.57789		-0.00256809	0.0113735	0.259882
SLX9	21		-0.000613006	0.75119	0.977039		-0.00451795	0.0128383	0.57789		-0.00347778	0.129142	0.667292
PM20D2	6		-0.00168364	0.120602	0.714239		-0.00245806	0.0131046	0.582904		0.000951886	0.444633	0.87369
SOX5	12		-0.000770413	0.456497	0.915665		0.00284429	0.0131353	0.582904		0.00122427	0.372589	0.840693
TIMM17A	1		-0.00121387	0.537642	0.933969		0.00543523	0.0132034	0.583055		0.00200219	0.413697	0.859555
IGSF8	1		-0.000580579	0.580886	0.941375		0.0026324	0.0131819	0.583055		0.000509408	0.687672	0.94348
GRM6	5		-0.00140243	0.143964	0.745424		-0.0022469	0.0132384	0.583171		-0.00171802	0.115574	0.648692
TMEM239	20		-0.001319	0.201109	0.806271		-0.00238881	0.0133822	0.588065		0.000121322	0.919472	0.98755
CHMP4B	20		-0.00648892	0.0437252	0.523105		-0.00795687	0.0134874	0.588728		0.00274903	0.487166	0.886692
OR10A3	11		-0.000444769	0.451867	0.914033		-0.00133762	0.0134953	0.588728		0.000679119	0.321381	0.821826
PHYKPL	5		-0.000392816	0.657187	0.95774		-0.00203745	0.0134318	0.588728		-0.00211722	0.0393593	0.447478
P2RY10	X		0.00222368	0.000956075	0.0376928		0.00152096	0.0138098	0.590969		-0.00148066	0.0558175	0.512345
SCAP	3		-0.0113572	0.01789	0.340878		0.0124426	0.0136027	0.590969		0.0182809	0.00197327	0.0900063
ATP11B	3		-0.00139281	0.0668943	0.60482		0.00203576	0.0136467	0.590969		0.000520047	0.592539	0.917711
GNPDA2	4		-0.0010459	0.239201	0.839103		-0.00201784	0.0138237	0.590969		0.00165034	0.115961	0.649095
GIP	17		-0.000957512	0.295405	0.866612		-0.00201062	0.0138381	0.590969		-0.00060044	0.555795	0.908282
FAM104B	X		0.00252759	0.350758	0.884919		-0.00606696	0.0138296	0.590969		-0.00842719	0.00689052	0.201536
ATP1A1	1		0.0025544	0.537627	0.933969		0.0102026	0.0138419	0.590969		0.00504317	0.313919	0.818733
C9orf72	9		-0.000407597	0.607793	0.949356		-0.0018622	0.0137699	0.590969		-0.00116685	0.219082	0.763545
TMEM144	4		-0.000249297	0.752671	0.977053		-0.00180182	0.0136463	0.590969		-0.000557745	0.540436	0.903569
GPATCH8	17		-0.00480165	0.00188863	0.0684657		-0.00367929	0.0141213	0.592094		0.00329411	0.0705942	0.559321
OR4E2	14		-0.00183765	0.0216638	0.379686		-0.00184046	0.0141311	0.592094		0.00148037	0.11452	0.647552
MYO9A	15		0.00173533	0.0764351	0.626877		0.00225875	0.0141297	0.592094		-0.00137652	0.223947	0.76731
TRANK1	3		0.000891933	0.274	0.85733		0.00196151	0.014114	0.592094		-0.00063571	0.513785	0.896046
PRMT2	21		0.00104548	0.325205	0.876741		-0.00237128	0.0139935	0.592094		-0.00349725	0.00405984	0.146292
NME1	17		-0.000860363	0.35279	0.885391		-0.00215899	0.0141282	0.592094		0.00021124	0.847767	0.975619
SCN10A	3		0.000746504	0.381248	0.892945		0.00196478	0.0140964	0.592094		-0.00131388	0.178663	0.724743
TCAP	17		0.000250205	0.797538	0.980044		0.00299477	0.0140172	0.592094		0.00106255	0.474768	0.882211
TBXA2R	19		0.00119572	0.232461	0.836294		-0.00215174	0.0145236	0.596466		-0.00143647	0.208488	0.755498
WARS1	14		-0.00282821	0.237525	0.838571		-0.00560357	0.0143897	0.596466		-0.0013508	0.630155	0.926645
LY6H	8		-0.00101093	0.265291	0.854201		-0.00218454	0.0143505	0.596466		0.00064829	0.559567	0.908282
NOL6	9		0.00240849	0.42743	0.907702		0.00703012	0.0144757	0.596466		-0.00288229	0.41033	0.857348
MALT1	18		-0.000630594	0.444417	0.912719		-0.00192524	0.0145334	0.596466		-0.000153843	0.875563	0.981024
KCNA3	1		-0.00037383	0.720664	0.970801		0.00256139	0.0145238	0.596466		0.00212362	0.10076	0.625292
SBSN	19		-0.000240931	0.788731	0.980022		-0.00212184	0.0144189	0.596466		-0.000573736	0.599923	0.91964
SRCAP	16		0.000414986	0.822494	0.983488		-0.00411305	0.0144183	0.596466		-0.00172169	0.418309	0.861201
LIMD1	3		5.11e-05	0.961915	0.996474		0.00245975	0.0144236	0.596466		-0.000849344	0.48198	0.88544
EDA2R	X		0.00454899	5.58e-07	5.26e-05		0.00196171	0.0157019	0.597649		-0.00283909	0.00581916	0.180636
NALF2	X		0.00444144	1.93e-06	0.00015181		0.00205892	0.015155	0.597649		-0.00190269	0.0818396	0.587724
BEX2	X		0.00260839	0.00202092	0.0725316		0.00183605	0.0150384	0.597649		-0.002195	0.0210364	0.347717
CYB561	17		-0.0030837	0.00674535	0.179249		-0.00260774	0.0147347	0.597649		0.00021758	0.865704	0.98059
IFIT5	10		0.00235719	0.00918594	0.22275		0.0019592	0.0151661	0.597649		-0.000249027	0.804842	0.968466
SPATA3	2		-0.00172513	0.0128816	0.277884		-0.00159231	0.0153993	0.597649		-0.000297695	0.711969	0.948152
RPN1	3		0.00541097	0.0232477	0.391293		0.00553028	0.0156053	0.597649		-0.000987747	0.72715	0.951747
MAML3	4		-0.00202308	0.0303378	0.45702		-0.00206582	0.0152759	0.597649		0.00100924	0.341352	0.830581
SHMT2	12		-0.00245737	0.0394574	0.502129		-0.00266538	0.0155444	0.597649		2.56e-05	0.984896	0.997236
TSPAN2	1		-0.00171079	0.0484344	0.54472		0.00204883	0.0154468	0.597649		0.00273241	0.00756811	0.210749
ILF2	1		0.00525971	0.0579977	0.583116		0.00619199	0.0155549	0.597649		-0.00193751	0.545203	0.905135
HNRNPM	19		0.00509933	0.0735051	0.619315		0.0064127	0.0146416	0.597649		0.00262611	0.418424	0.861201
RPS6KB1	17		-0.00141141	0.146623	0.74642		-0.00226422	0.0153176	0.597649		-0.000971207	0.399139	0.852168
CYP11A1	15		-0.00117166	0.147268	0.746687		-0.00178417	0.0154993	0.597649		-0.000743488	0.422469	0.863743
ATXN7L2	1		-0.00157295	0.15175	0.75427		0.00264415	0.0153315	0.597649		0.000126913	0.920153	0.98755
HELT	4		-0.00123148	0.169888	0.772169		-0.0020304	0.0151421	0.597649		-0.00148433	0.151115	0.691734
NUP155	5		-0.00245977	0.183903	0.788137		-0.00444965	0.0156942	0.597649		-0.000326403	0.885346	0.981594
RAB39A	11		0.0012757	0.220078	0.824355		0.0024875	0.0150553	0.597649		-0.000601928	0.633211	0.927751
FERD3L	7		-0.000914959	0.266448	0.854929		-0.00189833	0.0149584	0.597649		0.000246395	0.79998	0.96689
CNST	1		-0.000819915	0.267285	0.854929		-0.00166972	0.0150136	0.597649		-0.000212047	0.803116	0.967876
CTNNB1	3		0.00150903	0.316031	0.872947		0.00336442	0.0157564	0.597649		0.000245666	0.886232	0.981594
OLFML2B	1		0.000983139	0.337117	0.880904		0.00235346	0.0152291	0.597649		-0.00139559	0.243453	0.777161
PRKCSH	19		-0.000916472	0.44572	0.913071		-0.00265244	0.0154954	0.597649		-0.000667514	0.623782	0.92485
MIER2	19		-0.000508059	0.472764	0.920486		-0.00156798	0.0147855	0.597649		-0.00173651	0.028686	0.395134
TBC1D9B	5		-0.000635226	0.535543	0.933636		-0.00230793	0.0151572	0.597649		0.000202733	0.869504	0.980999
EBI3	19		0.000519197	0.592902	0.94426		-0.0020691	0.0153525	0.597649		-0.00322912	0.00315906	0.123732
EFR3B	2		-0.000412738	0.602589	0.947348		-0.00179529	0.0157266	0.597649		0.000499768	0.595626	0.918469
ADAMTS7	15		0.000602285	0.747631	0.975738		-0.0043129	0.0156942	0.597649		-0.00490216	0.0290756	0.39686
ZNF404	19		-0.000214033	0.781155	0.979292		-0.00175552	0.0151761	0.597649		-4.66e-06	0.995921	0.999082
DCANP1	5		0.000204712	0.800346	0.980044		0.00178107	0.0157451	0.597649		0.000293599	0.743659	0.9548
BHMT	5		0.000192804	0.802745	0.980293		0.00173762	0.014743	0.597649		0.00021237	0.809091	0.968753
TPPP	5		-0.000325625	0.841872	0.986345		-0.00362379	0.0146694	0.597649		-0.00204993	0.273743	0.794392
RRP7A	22		-0.00045896	0.84944	0.987511		0.0055352	0.0148884	0.597649		-0.000586497	0.830365	0.9719
S100B	21		-0.000119401	0.861128	0.988388		-0.0015454	0.0147019	0.597649		-0.000595323	0.449748	0.875119
OIT3	10		2.58e-05	0.977335	0.997429		0.00204919	0.0148359	0.597649		0.000292247	0.779888	0.961528
TCP10L3	6		1.93e-05	0.981533	0.998258		-0.00178815	0.015209	0.597649		-0.00112765	0.226983	0.76934
CD101	1		-0.00106835	0.2792	0.860624		0.00241206	0.0158695	0.59949		0.00306328	0.012344	0.269577
ZBTB47	3		0.000659995	0.47844	0.922394		0.00217332	0.0158715	0.59949		-0.00204689	0.0609861	0.530047
ATG4A	X		0.00532421	1.23e-08	2.12e-06		0.00201325	0.016389	0.600297		-0.00339505	0.00186204	0.0865083
SLC7A3	X		0.00330789	7.73e-06	0.000518022		0.00161032	0.0162854	0.600297		-0.00209728	0.0142005	0.288962
S1PR5	19		-0.00196876	0.0428761	0.519153		-0.00228083	0.0160355	0.600297		0.00147359	0.21415	0.760715
RAB3IP	12		-0.00156829	0.156244	0.756734		-0.00219511	0.0160085	0.600297		5.6e-05	0.961317	0.99576
MAPKAPK2	1		-0.00129002	0.184089	0.788197		-0.00217026	0.0162318	0.600297		0.000426332	0.704623	0.947109
ROCK2	2		-0.00177685	0.292036	0.86611		-0.00380886	0.0162056	0.600297		0.00122786	0.540178	0.903322
VIPR2	7		-0.000884247	0.384849	0.893648		-0.00235911	0.0162548	0.600297		-0.00072432	0.557118	0.908282
OR2T10	1		-0.000717728	0.452786	0.914621		-0.00212549	0.0163822	0.600297		-0.000619471	0.573104	0.91248
NACC1	19		0.000779098	0.519016	0.930644		0.00293046	0.0161048	0.600297		0.000384813	0.797017	0.966473
TAS1R1	1		-0.000324977	0.639354	0.953323		-0.00155302	0.0163555	0.600297		-5.69e-05	0.944754	0.99328
LRRC15	3		0.000490262	0.671899	0.961937		0.00269079	0.0160046	0.600297		-0.000556859	0.680904	0.942645
SLC7A14	3		-0.000295306	0.709508	0.969906		0.00191872	0.0163926	0.600297		0.000182354	0.849048	0.975694
TMEM214	2		-0.000417333	0.737558	0.974426		-0.00256243	0.0163234	0.600297		-0.00204811	0.121596	0.657499
PAXBP1	21		0.000719761	0.755298	0.977053		0.00522738	0.0160745	0.600297		-0.00260521	0.334438	0.828471
SLC4A9	5		-0.000105539	0.891921	0.991125		0.00171095	0.0162974	0.600297		-0.000909892	0.289542	0.807411
SASH1	6		-0.00197674	0.00576626	0.160822		-0.00165586	0.0167068	0.600431		0.00206721	0.0159756	0.303601
SLC26A11	17		-0.0022392	0.0736233	0.619557		-0.00296437	0.0167962	0.600431		-0.00217554	0.149708	0.691734
GABRQ	X		0.00121886	0.0913166	0.657307		0.00160967	0.0166763	0.600431		-7.48e-06	0.992814	0.998584
RPL36	19		-0.00255072	0.299926	0.866887		-0.00558229	0.0167062	0.600431		-0.00110859	0.704347	0.947109
PDPK1	16		-0.00154682	0.491581	0.92433		-0.00510971	0.01679	0.600431		0.000100638	0.97004	0.996589
EIF3E	8		-0.00161076	0.514432	0.927753		-0.00559702	0.0166551	0.600431		2.44e-05	0.993327	0.998648
MST1R	3		-0.000392338	0.650909	0.955469		-0.00207909	0.016583	0.600431		-0.00166258	0.121798	0.657655
PDXK	21		0.000467101	0.707286	0.96979		-0.00262311	0.0164552	0.600431		-0.00235043	0.0932766	0.612267
AMIGO3	3		0.000251661	0.730307	0.972214		0.00175415	0.016521	0.600431		0.00158012	0.085887	0.596448
CBS	21		-0.000238654	0.819973	0.98314		-0.00224122	0.0167805	0.600431		-0.00179559	0.130632	0.670158
PITPNC1	17		-0.000153847	0.881515	0.989521		-0.00218045	0.0167926	0.600431		-0.0013365	0.2445	0.777161
NOS1AP	1		-0.000202796	0.901738	0.991917		-0.00374159	0.0166297	0.600431		-0.00314486	0.104578	0.632916
PPP2R2C	4		-0.000164879	0.818696	0.98314		-0.0016205	0.0168435	0.600931		-0.00135912	0.107867	0.63819
SELENOP	5		-0.000643229	0.546505	0.93449		-0.00225743	0.016901	0.601788		-0.00046597	0.698765	0.945919
NPW	16		-0.0001887	0.854701	0.987511		-0.00218352	0.0169481	0.602276		-0.00297341	0.00875931	0.226437
FZD4	11		0.00197472	0.0548764	0.569563		0.00227661	0.0171159	0.606246		-0.00189456	0.110468	0.641203
PPP1R1B	17		-0.000161109	0.879541	0.989362		0.00277973	0.0171271	0.606246		-0.000275761	0.840982	0.973964
VWA2	10		0.00169967	0.065307	0.602816		0.00208693	0.017218	0.608268		-0.00159577	0.142111	0.687361
MTMR1	X		0.00386939	9.14e-07	7.99e-05		0.00166083	0.0173466	0.611611		-0.00142464	0.118794	0.651776
CRYGB	2		0.000435243	0.675792	0.962876		-0.00225804	0.0173832	0.611705		-0.00282867	0.018725	0.328449
VASP	19		0.000230438	0.780916	0.979292		0.00206639	0.0174233	0.611921		0.0013107	0.222289	0.765107
INTU	4		-0.000217404	0.813138	0.982642		-0.00200886	0.0174869	0.61296		-4.23e-05	0.968618	0.996589
ARSH	X		0.00429272	1.72e-11	1.03e-08		0.0013313	0.0175581	0.614015		-0.00340254	3.75e-06	0.000776121
TSPAN15	10		0.000439079	0.536197	0.933969		0.00161622	0.0175852	0.614015		0.000356779	0.678142	0.942031
RPL30	8		-0.00107826	0.618341	0.951238		-0.00460974	0.0176381	0.614673		-0.00131112	0.589989	0.916918
CCS	11		0.00247618	0.111814	0.700022		0.0035872	0.0177473	0.616096		-0.00222039	0.221056	0.765073
TTC23	15		-0.000243135	0.809789	0.981895		-0.00215415	0.0177297	0.616096		0.00044712	0.695846	0.94552
GLA	X		0.00598681	6.56e-13	7.39e-10		0.0016802	0.0178587	0.616398		-0.00436729	4.19e-06	0.000802573
RWDD2B	21		-0.00098223	0.19837	0.80291		-0.00173971	0.0178249	0.616398		0.000622911	0.494904	0.889722
VHL	3		0.00364275	0.331681	0.878952		0.00863985	0.0178096	0.616398		0.00234124	0.602692	0.920821
ASB7	15		0.00016122	0.863355	0.988693		-0.00205996	0.0179628	0.618805		-0.00171816	0.123332	0.659299
CD93	20		-0.00101535	0.284863	0.86457		-0.00233631	0.0180353	0.618937		-0.000259087	0.833673	0.973006
OR4F21	8		-0.00210995	0.417128	0.903592		-0.00584382	0.0180194	0.618937		-0.00250982	0.414764	0.859597
RGN	X		0.00527783	5.04e-14	1.13e-10		0.00139843	0.0187538	0.620982		-0.00468144	3.74e-09	3.21e-06
RAB40A	X		0.00564015	8.97e-10	2.41e-07		0.00192775	0.0187526	0.620982		-0.00482846	3.95e-06	0.000784188
AWAT2	X		0.00591601	1.22e-09	3.18e-07		0.00203689	0.0183686	0.620982		-0.00438543	6e-05	0.00652289
FAM167A	8		-0.002082	0.0404931	0.510009		-0.00230294	0.0185679	0.620982		0.00112597	0.361913	0.83567
SHISA2	13		-0.00152021	0.0829573	0.640317		-0.00207868	0.0185867	0.620982		0.000942637	0.384224	0.845152
FBF1	17		-0.00129264	0.146175	0.74642		-0.00199937	0.018878	0.620982		-0.000487307	0.642501	0.929645
TTI2	8		0.00356001	0.163355	0.761357		0.00569823	0.0186367	0.620982		0.001314	0.664695	0.937295
JAKMIP1	4		-0.00099817	0.213472	0.818076		-0.00172498	0.0187978	0.620982		0.00139009	0.14039	0.683807
CD1D	1		0.00138488	0.233111	0.836738		0.0026864	0.018807	0.620982		-0.000694521	0.616921	0.923586
BRD9	5		-0.00202111	0.271097	0.856575		-0.00388073	0.0186064	0.620982		-0.00064476	0.752352	0.955995
MED18	1		0.00245531	0.293244	0.866612		0.00511256	0.0182897	0.620982		-0.00127118	0.642013	0.929552
VDAC1	5		-0.00203853	0.303887	0.867841		-0.00420214	0.0187388	0.620982		0.000397097	0.857795	0.97774
TSEN2	3		-0.00210397	0.360622	0.888492		0.00517779	0.0186493	0.620982		0.00692312	0.00997285	0.243726
CCDC149	4		0.000473746	0.493636	0.92433		0.00154604	0.0188068	0.620982		0.000968421	0.247334	0.778261
BACE2	21		0.000611091	0.533408	0.933153		-0.00213839	0.0186309	0.620982		-0.000625749	0.588073	0.916544
KCNJ6	21		0.000542557	0.573644	0.940004		-0.00196259	0.0188522	0.620982		-0.00175772	0.096393	0.617368
FOXL2NB	3		0.000242238	0.735142	0.973864		0.00162192	0.0185589	0.620982		0.00147514	0.0863285	0.598224
RNF6	13		-0.000364751	0.740692	0.974473		-0.00232991	0.0181295	0.620982		-0.00296987	0.0157653	0.300894
ZC3H10	12		-0.00048457	0.775582	0.978473		-0.00357442	0.0188876	0.620982		-0.000744904	0.708527	0.947198
SERPINB6	6		0.000209432	0.815347	0.98314		0.0021457	0.0182514	0.620982		-0.000265099	0.807533	0.968647
FAM234A	16		-0.000127276	0.861648	0.988428		-0.00159859	0.018728	0.620982		-0.000560591	0.51399	0.896209
BORCS8	19		-0.000193312	0.902774	0.992014		-0.00333668	0.0183821	0.620982		-0.00101863	0.578621	0.914026
TMEM267	5		-9.41e-05	0.906704	0.992564		-0.00171791	0.0184015	0.620982		-0.000752031	0.413324	0.859358
DGAT2L6	X		0.0050588	1.01e-10	4.29e-08		0.0016491	0.0208368	0.624592		-0.00367521	4.45e-05	0.0050749
TLR7	X		0.00442424	5.16e-09	1.09e-06		0.00156134	0.0212264	0.624592		-0.00362661	2.46e-05	0.00313878
TMEM35A	X		0.00474663	1.96e-08	3.13e-06		0.00172011	0.0204257	0.624592		-0.00346152	0.000277632	0.0219336
SOWAHD	X		0.0038267	2.92e-08	4.41e-06		0.00142802	0.0194849	0.624592		-0.00204082	0.0103665	0.249259
EFNB1	X		0.00305166	0.000272691	0.0124697		0.00185418	0.0197922	0.624592		-0.00299985	0.00255204	0.106682
CXorf65	X		0.00225004	0.00212111	0.0756305		0.00154412	0.0209589	0.624592		-0.00116673	0.15935	0.702776
CHD7	8		-0.0034345	0.0180756	0.342809		-0.00332051	0.0198607	0.624592		0.00357128	0.046802	0.473726
FAM118A	22		-0.00210301	0.0218967	0.381893		-0.00216529	0.01905	0.624592		-0.000431522	0.703818	0.947109
LYPLA2	1		-0.00271339	0.0234356	0.391442		-0.00256594	0.0208074	0.624592		0.0016437	0.230802	0.771449
TMEM245	9		-0.00183349	0.0432966	0.521189		-0.00177959	0.0212719	0.624592		0.00103293	0.290927	0.807975
ZNRD2	11		0.00220197	0.0617272	0.589199		0.00267673	0.021269	0.624592		8.63e-05	0.952191	0.994239
SMYD4	17		0.00145825	0.0678453	0.605765		-0.00167416	0.0198699	0.624592		-0.000731125	0.433456	0.868528
GRB2	17		0.00718188	0.0683041	0.606844		0.00955861	0.0203008	0.624592		-0.00857478	0.0682929	0.553135
LRRC46	17		-0.00184865	0.0695338	0.610522		-0.00221551	0.0191586	0.624592		2.77e-05	0.981255	0.996992
CLK3	15		-0.00219978	0.07736	0.62727		-0.00270553	0.0208707	0.624592		0.000475829	0.740631	0.954043
CD3G	11		-0.00151809	0.0848375	0.642529		-0.0018174	0.019469	0.624592		-0.00142959	0.129694	0.668084
USP12	13		-0.00160461	0.0869809	0.646311		-0.0019567	0.0209218	0.624592		-0.000482832	0.651406	0.932569
OR2T8	1		-0.00183139	0.118435	0.709607		-0.00254886	0.0213547	0.624592		0.000596112	0.666295	0.937679
GATA3	10		-0.0022178	0.123416	0.715513		-0.00329602	0.0202571	0.624592		0.000988674	0.570258	0.911923
SPATA17	1		0.000932081	0.135515	0.733693		-0.00141502	0.0190885	0.624592		-0.00127048	0.0918516	0.609675
HADH	4		-0.00121569	0.144157	0.745424		-0.00172398	0.021287	0.624592		0.000653226	0.49008	0.887837
ERC1	12		-0.00135504	0.152079	0.754408		-0.0021188	0.0206285	0.624592		0.000196415	0.862932	0.979428
ALG1	16		0.00427728	0.159171	0.757776		0.0068092	0.0194692	0.624592		0.0013753	0.700323	0.945931
ANXA8	10		0.00142301	0.162707	0.76075		0.00216035	0.0203655	0.624592		-0.000512191	0.657461	0.935519
DESI1	22		-0.00129591	0.193156	0.798585		-0.00212275	0.0211512	0.624592		-4.03e-05	0.972154	0.996589
CSKMT	11		0.001268	0.208721	0.815472		0.00234682	0.0200383	0.624592		0.000504557	0.68651	0.94348
TTLL10	1		-0.00117637	0.224475	0.830631		-0.00203051	0.0207352	0.624592		-0.000877051	0.426257	0.866219
MADD	11		0.000922704	0.234107	0.837501		0.00174939	0.0212367	0.624592		9.72e-05	0.91937	0.98755
CDH2	18		0.00185257	0.241954	0.839734		0.00377723	0.0197019	0.624592		0.000849375	0.666888	0.938037
PRL	6		-0.00121521	0.252041	0.846872		-0.00220005	0.0192729	0.624592		0.00034516	0.765093	0.959381
PPP3CA	4		-0.0010716	0.265415	0.854201		-0.0020163	0.0206451	0.624592		0.000621741	0.570167	0.911923
TRAF2	9		0.0025715	0.300533	0.866887		0.00589911	0.0207125	0.624592		0.00688607	0.0393602	0.447478
AGTR1	3		0.000827234	0.322136	0.87454		0.00185882	0.0211684	0.624592		0.000754058	0.460716	0.878061
PRRC2C	1		-0.00130817	0.333016	0.878952		-0.00291648	0.0192518	0.624592		-0.00212759	0.165885	0.710763
RTCB	22		0.00282902	0.348713	0.884399		0.00666731	0.0206459	0.624592		-3.95e-05	0.991063	0.998251
GBP6	1		0.00071533	0.366902	0.891117		0.00176984	0.0195731	0.624592		0.00111988	0.235344	0.77399
FSIP2	2		-0.000738595	0.374965	0.892381		-0.00188435	0.0200696	0.624592		0.000766074	0.456711	0.87646
SMARCD2	17		0.000924169	0.37622	0.892829		-0.00221583	0.0199672	0.624592		-0.00129393	0.289114	0.807411
MEI1	22		-0.000655166	0.389963	0.894899		-0.00162361	0.0205117	0.624592		-0.000821765	0.345776	0.8322
OR2M7	1		-0.000716238	0.435176	0.910477		-0.00193779	0.0205315	0.624592		-0.00152567	0.138989	0.6809
TMEM132D	12		0.00062747	0.446403	0.913071		0.00167091	0.0213247	0.624592		3.58e-05	0.968759	0.996589
ADGRF5	6		0.000809805	0.452226	0.914451		0.00230651	0.0209221	0.624592		-0.000349973	0.779731	0.961504
CSF1	1		-0.000682863	0.463002	0.917904		0.00212026	0.0192199	0.624592		0.00328176	0.0041575	0.147771
KLF11	2		-0.000551945	0.493962	0.92433		-0.0017063	0.0203992	0.624592		-0.00155426	0.0876508	0.601092
WDR17	4		-0.00054281	0.510967	0.926929		-0.00186553	0.0196265	0.624592		-0.00142882	0.149022	0.690747
RPS27A	2		-0.00152396	0.524812	0.930955		-0.00526087	0.0211563	0.624592		-0.00115137	0.685527	0.94348
BRF1	14		-0.00127898	0.525245	0.93104		-0.00438059	0.0205744	0.624592		0.00123722	0.600788	0.920129
FOXL1	16		-0.00054572	0.55749	0.936594		-0.00197152	0.0212585	0.624592		8.24e-05	0.940105	0.991969
MECOM	3		-0.000559908	0.596809	0.945435		0.00271556	0.0198663	0.624592		0.00086221	0.532803	0.90149
ACTRT3	3		0.00037928	0.606458	0.949031		0.00178449	0.0197402	0.624592		4.43e-05	0.962802	0.996146
ATP13A5	3		-0.0003764	0.609093	0.949615		0.00161214	0.019842	0.624592		0.000931483	0.277032	0.798222
IRX2	5		-0.000389747	0.637032	0.953031		-0.00171612	0.0198792	0.624592		0.000355388	0.701077	0.946172
ZNF687	1		0.000636104	0.663793	0.960092		0.00337519	0.019674	0.624592		0.00272438	0.128503	0.667292
HMOX1	22		-0.000269324	0.734266	0.973635		-0.00177909	0.0191965	0.624592		0.0003282	0.732304	0.952904
OR2T27	1		0.000322204	0.762391	0.977344		-0.00219017	0.0202816	0.624592		-0.00246339	0.0357109	0.433268
IRAG2	12		0.000288283	0.757811	0.977344		0.00275999	0.0209155	0.624592		0.000205813	0.885927	0.981594
MFSD2B	2		-0.000206269	0.790812	0.980022		-0.00166892	0.0194188	0.624592		-0.00104448	0.240206	0.776575
TRIM28	19		0.000507258	0.796836	0.980044		-0.00403936	0.0211962	0.624592		-0.00563958	0.0113952	0.259882
TET1	10		0.000153248	0.82512	0.983783		0.00146493	0.0203618	0.624592		0.00088059	0.262792	0.788268
ELAPOR1	1		-0.000197558	0.827928	0.983924		0.00203936	0.0203041	0.624592		0.00224405	0.038314	0.445442
ANO1	11		-0.000217052	0.850517	0.987511		0.00275448	0.0210712	0.624592		0.000735575	0.592819	0.917711
RBPJ	4		0.000272335	0.876587	0.98908		-0.00374875	0.020704	0.624592		-0.00305018	0.139793	0.682145
SMAD1	4		-0.000145639	0.877019	0.989112		-0.00199654	0.0210651	0.624592		-0.00175321	0.103892	0.631761
CROCC	1		0.0001	0.930446	0.994377		0.00259988	0.0202872	0.624592		0.00162414	0.242979	0.777161
TMEM14C	6		2.73e-05	0.966782	0.997126		-0.00141167	0.0211304	0.624592		-0.00091788	0.229503	0.770622
KRT40	17		-2.4e-05	0.974326	0.997289		0.00163068	0.0193606	0.624592		0.00132196	0.131307	0.671115
OGA	10		-2.77e-05	0.985912	0.998646		-0.00339137	0.0196725	0.624592		-0.00111175	0.552234	0.907704
TRPM2	21		-6.09e-06	0.99577	0.998927		-0.00242829	0.019348	0.624592		-0.00270637	0.0380544	0.445442
LAGE3	X		-0.000541947	0.564098	0.937679		-0.0020535	0.0214078	0.625128		-0.00118628	0.289185	0.807411
ELAPOR2	7		-0.000208552	0.809086	0.981798		0.00198251	0.0214582	0.625587		0.00181827	0.0952527	0.616236
RBBP7	X		0.00946109	5.57e-07	5.26e-05		0.00374001	0.0215691	0.62602		-0.00734277	0.000673616	0.0430374
TAF13	1		-0.00348502	0.00550166	0.154639		-0.00270305	0.0216459	0.62602		0.00219444	0.129315	0.667292
ZNF264	19		0.00119326	0.144707	0.74642		-0.00173954	0.0215794	0.62602		-0.00146687	0.138725	0.679927
PLCE1	10		0.000920551	0.323728	0.875706		0.00202243	0.0216291	0.62602		-0.00108691	0.318932	0.820692
DENND4B	1		0.000535264	0.631422	0.952633		0.00248075	0.0216468	0.62602		-0.000523788	0.69341	0.944617
STX16	20		-0.00181503	0.0189707	0.351641		-0.0016462	0.0219258	0.626223		0.000195672	0.823555	0.971542
TNFRSF10D	8		-0.00116225	0.124254	0.716838		-0.00159629	0.0218598	0.626223		0.000384855	0.655343	0.935011
ZNF383	19		-0.00099736	0.260918	0.852124		-0.00193314	0.0217754	0.626223		0.000840389	0.438122	0.870686
NFKB2	10		-0.00138199	0.329162	0.876836		-0.00308573	0.0219061	0.626223		0.00244333	0.165553	0.710682
ITGBL1	13		0.000487021	0.458175	0.915792		-0.00143007	0.021822	0.626223		-0.00146807	0.057524	0.517429
KDM4C	9		-0.000657216	0.500257	0.924447		-0.00194742	0.0217658	0.626223		-0.000197038	0.853013	0.976504
TMC2	20		0.000374233	0.653014	0.955855		-0.00171566	0.0219319	0.626223		-0.00362	9.31e-05	0.00916283
NCKAP1	2		0.000119624	0.95362	0.996356		0.00508028	0.021906	0.626223		0.00342965	0.173006	0.718619
ZP4	1		-0.00161664	0.0564069	0.574439		-0.00181603	0.0221143	0.630053		-0.000646183	0.502919	0.892239
ALG13	X		0.00577399	0.0808958	0.636741		0.00744076	0.0221575	0.630053		-0.00151103	0.706413	0.947109
ALS2	2		-0.000442064	0.447108	0.913071		-0.00119356	0.0221709	0.630053		0.000398279	0.542654	0.904346
POLE4	2		-0.000141856	0.948917	0.995463		-0.00439625	0.0222409	0.631046		-0.0011638	0.640921	0.929552
UPK3A	22		-0.0018061	0.0200646	0.366266		-0.00166774	0.0223847	0.631295		-0.000978605	0.284234	0.802606
ANKAR	2		0.000636023	0.356518	0.887311		-0.00157496	0.0223522	0.631295		-0.000984258	0.252593	0.781318
MRGPRX1	11		-0.000828556	0.41858	0.904169		-0.00223084	0.0223749	0.631295		0.00179742	0.161968	0.707092
INPP5K	17		1.11e-05	0.994433	0.998706		-0.00322685	0.0223898	0.631295		-0.00202181	0.254288	0.783388
BCORL1	X		0.00450606	1.04e-06	8.9e-05		0.00186899	0.0226039	0.632592		-0.00375598	0.000393749	0.0291941
LRRC34	3		-0.00214286	0.0199399	0.364377		0.00209144	0.0226114	0.632592		0.00237645	0.0350828	0.429699
SNAPC1	14		0.0066379	0.034787	0.478455		0.00677085	0.0225673	0.632592		-0.00289716	0.430262	0.867901
POLR3H	22		0.00372033	0.205554	0.810359		0.00633011	0.0225172	0.632592		-0.000932779	0.784078	0.962574
CEP192	18		-0.000648024	0.76423	0.977454		-0.00475181	0.0225109	0.632592		-0.00182552	0.485658	0.886461
DND1	5		-0.00355778	0.0626962	0.59311		-0.0039119	0.0230154	0.636888		0.000669011	0.756963	0.957148
FOSL2	2		-0.0030516	0.0948253	0.666589		-0.00361812	0.0229035	0.636888		-0.00120171	0.529387	0.899525
EFR3A	8		0.00442474	0.113899	0.704714		0.00632064	0.0230266	0.636888		0.000929061	0.786934	0.964101
COLEC11	2		-0.00100248	0.272069	0.856575		-0.00185514	0.0230477	0.636888		0.000471036	0.6463	0.93137
MTHFS	15		-0.000621862	0.510196	0.926929		-0.00199691	0.0229792	0.636888		-0.00181715	0.0944808	0.615147
GPC1	2		0.000576843	0.601152	0.946461		-0.00226792	0.0229681	0.636888		-0.00172215	0.174429	0.719809
MBD3L2	19		0.000520103	0.730852	0.97233		-0.00315962	0.0230022	0.636888		-0.00209083	0.239924	0.776457
TMBIM1	2		5.04e-05	0.951178	0.996115		-0.00166783	0.022998	0.636888		-0.000104001	0.910699	0.98618
OCRL	X		0.00460591	1.14e-07	1.38e-05		0.00180365	0.0231602	0.637441		-0.00375835	0.000249546	0.0200717
DDX53	X		0.00349871	8.7e-05	0.00446615		0.00177241	0.0232447	0.637441		-0.00146224	0.147222	0.689423
OR4K14	14		-0.00131286	0.0934283	0.663136		0.00172608	0.0231244	0.637441		0.00313376	0.00093364	0.0534117
KIR2DL4	19		-0.000667323	0.404226	0.899026		-0.00173733	0.0231835	0.637441		-0.000254178	0.793504	0.966114
UPF2	10		-0.00086734	0.72426	0.971889		-0.00538619	0.0232214	0.637441		-0.000821886	0.780889	0.961828
PRAG1	8		-0.0014384	0.179592	0.782803		-0.00237864	0.023372	0.639959		-0.000107369	0.933886	0.990895
MSX1	4		0.000488946	0.50771	0.926052		-0.0014644	0.0234585	0.641353		-0.000435741	0.601608	0.920602
ZNF226	19		0.00213678	0.0106551	0.24409		0.00178234	0.0235953	0.644116		-0.0010611	0.28162	0.801675
SLC16A2	X		0.00635907	6.09e-11	2.68e-08		0.00193621	0.0243414	0.645388		-0.00503913	8.07e-06	0.00135927
PDZD11	X		0.00520465	4.78e-10	1.41e-07		0.00174635	0.0250545	0.645388		-0.00351227	0.00057197	0.0384522
DRP2	X		0.00417363	1.83e-09	4.52e-07		0.00133568	0.0240468	0.645388		-0.0033068	1.74e-05	0.00255499
GCNA	X		0.00418439	1.1e-08	2e-06		0.00153374	0.0249434	0.645388		-0.00390209	1.5e-05	0.00224124
AMOT	X		0.00453831	3.94e-07	3.94e-05		0.00166787	0.0243186	0.645388		-0.00410653	9.67e-06	0.00158398
PTCHD1	X		0.00207333	0.00186609	0.067877		0.00130153	0.0250748	0.645388		-0.000698095	0.349485	0.833111
CACFD1	9		-0.00186541	0.00722927	0.188215		-0.00144791	0.0244689	0.645388		0.00141797	0.079011	0.581054
CTSF	11		0.00334865	0.00794687	0.200812		0.00270331	0.0243555	0.645388		-0.0022585	0.128056	0.667292
TEX9	15		0.00215188	0.0116472	0.259391		0.00197816	0.0249704	0.645388		-0.000674948	0.547173	0.905508
CMC2	16		-0.00146429	0.0281212	0.436775		-0.00141883	0.0246159	0.645388		0.000621818	0.425285	0.865329
GNAL	18		-0.00179224	0.0352658	0.478813		-0.00169076	0.0247988	0.645388		0.00145813	0.123281	0.659299
PCDHA11	5		0.00175461	0.0468967	0.536809		0.00186906	0.0236827	0.645388		-0.00154498	0.138104	0.678997
ACOT11	1		-0.00194051	0.0481195	0.543213		-0.00199869	0.0238857	0.645388		0.000365699	0.736659	0.953065
FOS	14		0.00168986	0.0772681	0.62727		0.00196513	0.0241458	0.645388		-0.00130078	0.238837	0.776414
RAET1E	6		-0.00113734	0.115046	0.704999		-0.00149389	0.0238914	0.645388		-1.21e-05	0.988313	0.998006
SEC23B	20		-0.00167106	0.17795	0.781977		-0.00268098	0.0250686	0.645388		-0.00136581	0.353268	0.833154
MANEAL	1		-0.00118341	0.200358	0.805231		-0.00190204	0.0241782	0.645388		4.5e-05	0.965734	0.996527
DHX29	5		-0.00305743	0.241741	0.839734		0.00609169	0.0250618	0.645388		0.00637974	0.0343248	0.424214
ATP1B2	17		-0.00114475	0.286318	0.86457		-0.00206838	0.0246621	0.645388		-0.000995088	0.387022	0.847161
BCCIP	10		-0.00124924	0.289363	0.864749		-0.00232505	0.0247444	0.645388		-0.000605764	0.636293	0.928173
METTL6	3		0.000862879	0.344452	0.881015		0.00193179	0.0247684	0.645388		-0.000478413	0.652417	0.933275
ZFYVE21	14		-0.000829249	0.341782	0.881015		-0.00180334	0.0248501	0.645388		-0.000333972	0.739789	0.954032
SERP2	13		-0.000831419	0.408882	0.901142		-0.00204964	0.0248256	0.645388		-0.00205645	0.0655162	0.545685
RRP9	3		-0.00119248	0.427076	0.907618		0.00329128	0.0244667	0.645388		4.24e-05	0.980619	0.996992
HLA.A	6		-0.000854049	0.450445	0.913309		-0.00233033	0.0244899	0.645388		-0.000407832	0.758477	0.957839
PNPLA1	6		-0.000596046	0.482359	0.922887		-0.00184678	0.0242522	0.645388		0.000732846	0.473539	0.881005
DYNC2I2	9		-0.000545469	0.533371	0.933153		-0.00197743	0.0244528	0.645388		-0.00103551	0.345281	0.831988
IL1RL1	2		-0.000383681	0.577128	0.940107		0.00149506	0.0245	0.645388		0.00132997	0.10164	0.627615
MCRIP2	16		-0.000464394	0.600657	0.946445		-0.00194712	0.024996	0.645388		-0.000343031	0.755639	0.956873
PNMA1	14		0.000482445	0.610207	0.950264		0.00204238	0.0239668	0.645388		-0.000174085	0.875301	0.981024
LCN10	9		-0.00090281	0.614898	0.950676		-0.00378866	0.0244025	0.645388		-0.00121206	0.56537	0.911115
NUFIP2	17		0.000607379	0.625281	0.952633		-0.00250298	0.0244039	0.645388		-0.00205617	0.148941	0.690546
METTL21C	13		0.000373522	0.669203	0.961256		-0.00183949	0.024799	0.645388		-0.000409012	0.696318	0.94552
SLC16A12	10		0.000280063	0.709774	0.969906		0.00171106	0.0244633	0.645388		-0.000568168	0.535816	0.90149
PRPF19	11		0.000989562	0.732054	0.972667		0.00589639	0.0249212	0.645388		-0.00186542	0.564292	0.91047
FREM1	9		0.000293294	0.758479	0.977344		-0.00188264	0.0238261	0.645388		-0.00139599	0.186772	0.731168
TMX2	11		-0.000479733	0.834018	0.984514		0.00506704	0.0246132	0.645388		0.00298939	0.270794	0.792728
EOGT	3		-0.000135277	0.872263	0.988952		0.00177417	0.0237477	0.645388		-0.000353924	0.707967	0.947185
PYROXD1	12		-0.00029179	0.921767	0.993795		0.00666302	0.0248028	0.645388		0.00111633	0.752718	0.955995
PLEKHG2	19		1.58e-05	0.984585	0.998457		0.00188758	0.0247052	0.645388		-2.56e-05	0.979857	0.996992
ARL13A	X		0.00285025	2.64e-05	0.00156947		0.00134468	0.025348	0.64551		-0.00240961	0.00164975	0.0801175
SUPT16H	14		-0.00356558	0.213721	0.818532		-0.00596344	0.0254019	0.64551		-0.00121791	0.709584	0.947265
CEP41	7		-0.00128912	0.223811	0.829843		-0.00225568	0.0253902	0.64551		0.000454051	0.721986	0.951297
SORBS1	10		0.000772236	0.231844	0.836294		0.00138349	0.0251574	0.64551		0.00103299	0.18447	0.729956
CLDN14	21		-0.000758585	0.346795	0.882485		-0.00170316	0.0252617	0.64551		-0.00058077	0.537169	0.901637
ZNF699	19		0.000877169	0.468395	0.918769		-0.00232116	0.0253646	0.64551		-0.00165434	0.215023	0.760969
PCDH7	4		-0.00062852	0.487657	0.924087		-0.001888	0.0253848	0.64551		0.000825308	0.440927	0.872699
MIS18A	21		0.00201421	0.526109	0.93104		0.00685541	0.0252565	0.64551		0.000894906	0.812904	0.969829
C3orf20	3		0.000414181	0.611705	0.950314		0.00175438	0.0253522	0.64551		0.000482426	0.621392	0.924686
PPP4R2	3		-0.00371342	0.260229	0.852124		-0.0068187	0.0254597	0.646066		-0.00215125	0.573309	0.912725
ZNF273	7		-0.00250879	0.344208	0.881015		-0.0056756	0.0255695	0.647031		0.00216613	0.503747	0.892239
HAL	12		-0.000433326	0.638848	0.953323		-0.00182078	0.0255577	0.647031		-0.000572761	0.574301	0.913189
NACA2	17		-0.00112321	0.183737	0.788137		-0.00184921	0.0257894	0.64952		-0.000915861	0.363831	0.836899
SCN5A	3		-0.000533409	0.508973	0.926653		0.00178255	0.0257655	0.64952		0.000204645	0.832732	0.972637
SPSB3	16		-0.000498739	0.555647	0.936254		-0.0017739	0.0258121	0.64952		-0.00137664	0.160565	0.704381
TNS2	12		-4.21e-05	0.966254	0.997126		0.00225824	0.0257603	0.64952		-0.000669563	0.576836	0.913894
LHFPL1	X		0.00445971	1.29e-06	0.000109023		0.00172632	0.026131	0.651931		-0.00317624	0.00188027	0.0870031
CSRNP3	2		0.00184113	0.0204506	0.37		0.00162627	0.0263783	0.651931		0.000493618	0.592858	0.917711
KLRD1	12		-0.0008925	0.189168	0.795762		-0.00135684	0.0263738	0.651931		0.000588485	0.441805	0.872892
ZDHHC17	12		0.00142036	0.246183	0.840869		-0.00252822	0.0260381	0.651931		-0.00232017	0.112975	0.646591
ZNF74	22		0.00101938	0.310249	0.870019		0.00231031	0.0263176	0.651931		-0.000372771	0.7682	0.960104
PLA2G4B	15		0.000616155	0.399521	0.897363		0.00154048	0.026024	0.651931		-0.000309311	0.719909	0.951048
TNIP3	4		-0.000661159	0.478066	0.922394		-0.00202672	0.0262693	0.651931		-0.000868624	0.445913	0.874346
OXGR1	13		-0.000566358	0.527568	0.931201		-0.00186852	0.0261541	0.651931		-0.00228028	0.0257363	0.376679
PDCD7	15		0.000875043	0.586822	0.943145		-0.00354728	0.0261855	0.651931		-0.00166942	0.405746	0.85481
GPX7	1		0.000471742	0.606786	0.949031		0.00198669	0.0260851	0.651931		-0.00015984	0.882176	0.981594
MINDY3	10		-0.000249189	0.715154	0.970801		-0.0014774	0.0261985	0.651931		-0.000177349	0.829796	0.9719
OR52A5	11		-0.000196308	0.794151	0.980044		-0.0015003	0.0262931	0.651931		-1.48e-05	0.985918	0.997295
REC8	14		0.000150486	0.88052	0.989362		0.00229006	0.0260187	0.651931		0.000705554	0.576697	0.913894
SSR2	1		0.00665027	8.35e-05	0.00431054		0.00353092	0.0265778	0.654528		-0.00510228	0.00824152	0.220713
TIMELESS	12		0.00216782	0.410667	0.901624		0.00530361	0.0265924	0.654528		0.00339935	0.254001	0.783083
PLCXD2	3		0.000794029	0.483782	0.923477		0.00247478	0.0265495	0.654528		0.00111569	0.422401	0.863743
NTMT2	1		-1.71e-05	0.987399	0.998685		0.0021976	0.0266378	0.654751		0.000473568	0.695907	0.94552
TNS1	2		-0.00109055	0.227679	0.834425		-0.00179649	0.0266897	0.655133		0.000526083	0.607331	0.921112
MEF2A	15		-0.000754861	0.412065	0.902197		-0.00187382	0.0267918	0.655852		-0.000198037	0.851498	0.976104
GPX4	19		0.00220243	0.531224	0.932307		-0.0074604	0.0267915	0.655852		-0.00817741	0.0555384	0.51193
DVL2	17		-0.000663954	0.358475	0.888009		-0.00150661	0.0269065	0.655987		0.000227239	0.790197	0.965643
STXBP4	17		-0.000709236	0.366719	0.891117		-0.0016395	0.0268413	0.655987		0.000496992	0.590903	0.917329
GFRA1	10		0.000370882	0.665825	0.961104		0.00182863	0.0268963	0.655987		0.000120025	0.90757	0.985652
PIP4P1	14		-0.000557045	0.495532	0.924447		0.00186263	0.0270282	0.656291		-0.000196812	0.846231	0.975619
DEFB132	20		-0.000323664	0.6782	0.963196		-0.00160496	0.0270016	0.656291		-0.000527582	0.559453	0.908282
TBC1D14	4		-0.000334586	0.726579	0.971889		-0.00194944	0.0270244	0.656291		-0.000921576	0.406226	0.854969
ST6GAL2	2		0.000849931	0.35006	0.884866		0.00196017	0.027116	0.65665		-0.000713541	0.507288	0.893694
SIGIRR	11		-0.000368201	0.579881	0.940899		-0.00141749	0.0271265	0.65665		-9.97e-05	0.900453	0.982741
BRWD1	21		0.000518187	0.58916	0.943653		-0.00184689	0.0271524	0.65665		-0.00254805	0.0153203	0.299703
STKLD1	9		-0.00159942	0.0640525	0.599203		-0.0017926	0.0272118	0.657204		0.000267937	0.791669	0.965928
MPV17	2		-0.00273659	0.0100845	0.236704		-0.00213796	0.0274541	0.657276		-0.000642302	0.587027	0.916209
MTNR1B	11		-0.0018998	0.0653113	0.602816		-0.00207052	0.0274108	0.657276		0.000738486	0.531701	0.90137
ZNF713	7		0.00195192	0.0712482	0.613824		0.00217905	0.0274059	0.657276		-0.000559589	0.65139	0.932569
FASN	17		-0.0019373	0.366388	0.891117		0.00544421	0.0274701	0.657276		0.000991313	0.704333	0.947109
COMMD10	5		0.000355142	0.722342	0.971118		-0.0020765	0.0274047	0.657276		-0.00110608	0.351163	0.833154
ZMIZ1	10		0.000429295	0.774064	0.978473		-0.00296905	0.0272527	0.657276		-0.00415403	0.014072	0.288483
ZNF496	1		0.000239027	0.814057	0.982747		-0.00196533	0.0273726	0.657276		-0.00084045	0.461173	0.878512
NXT1	20		-0.00917553	0.00853702	0.211862		-0.00750802	0.0275716	0.658715		0.00687449	0.0970286	0.617934
PDYN	20		-0.00158239	0.042922	0.519359		-0.00160403	0.0280345	0.658715		-2.77e-05	0.97554	0.996694
TIMD4	5		-0.00095819	0.0642842	0.599325		-0.00104975	0.0278697	0.658715		0.000444232	0.455626	0.87646
TAF12	1		-0.00345914	0.106515	0.689715		-0.00443696	0.0281128	0.658715		0.00267505	0.284255	0.802606
CTNNA1	5		-0.00236566	0.153525	0.755606		0.00382269	0.0276831	0.658715		0.00375206	0.0646994	0.544464
SERPINB2	18		-0.000883286	0.225022	0.831671		-0.00149169	0.0279557	0.658715		0.00127803	0.133498	0.674276
UBL4B	1		0.00111342	0.291506	0.865889		0.00222261	0.0279868	0.658715		0.000478566	0.697868	0.945919
FNBP4	11		-0.00185817	0.304502	0.867841		-0.00392654	0.0281518	0.658715		-0.00170266	0.444871	0.87369
SBK1	16		0.000810917	0.416261	0.903262		0.00209602	0.0281454	0.658715		0.000789561	0.516204	0.897294
ZNF706	8		-0.000746712	0.556198	0.936457		-0.00249984	0.0278375	0.658715		0.000427455	0.768549	0.960194
CADM3	1		-0.000474032	0.570772	0.939974		0.00181876	0.0281194	0.658715		0.0018946	0.0642103	0.542613
SLC25A15	13		0.000402187	0.651774	0.955648		-0.00186181	0.0279299	0.658715		-0.00219906	0.0367487	0.440025
RNF180	5		-0.000220962	0.767419	0.977785		0.00155178	0.0276783	0.658715		0.00134994	0.130106	0.668878
PFDN4	20		-0.000458494	0.78215	0.979292		-0.003396	0.0277133	0.658715		-0.000485607	0.801312	0.967514
CLEC2L	7		0.000137101	0.890188	0.991125		-0.00198709	0.0280397	0.658715		-0.000922679	0.417264	0.860505
RAB3GAP2	1		0.000124741	0.897213	0.991125		0.00201166	0.0278053	0.658715		-0.000571421	0.599199	0.919102
KNTC1	12		-1.53e-05	0.99422	0.998706		-0.0042253	0.0280712	0.658715		-0.00839719	0.000353861	0.0267879
GRPR	X		0.00653607	1.13e-11	8.45e-09		0.00174192	0.0285893	0.659788		-0.00618389	3.53e-09	3.18e-06
SULT4A1	22		-0.00200008	0.0101569	0.237476		-0.00174787	0.0286494	0.659788		0.000382682	0.696652	0.94552
VIM	10		0.00164357	0.0520879	0.5608		0.00171655	0.0285199	0.659788		0.00053736	0.586495	0.916134
ARFGEF1	8		0.00188625	0.0671375	0.60482		0.00201292	0.0288481	0.659788		0.00025901	0.825427	0.971564
COX7B	X		-0.00370027	0.0773544	0.62727		-0.00440345	0.0289246	0.659788		-0.000874265	0.722554	0.951297
C11orf80	11		0.0015193	0.121525	0.714523		0.00211162	0.0289231	0.659788		-0.000846181	0.469128	0.879791
STARD13	13		-0.00095758	0.183999	0.788137		-0.00150723	0.0291132	0.659788		-0.000327518	0.704895	0.947109
NTM	11		-0.00108003	0.241737	0.839734		-0.00188495	0.0289154	0.659788		-0.00039372	0.714827	0.948857
ZNF805	19		0.000611929	0.29361	0.866612		-0.00115524	0.0282883	0.659788		-0.00130664	0.0530413	0.501651
PLEKHG4B	5		0.0011433	0.324046	0.875706		-0.00236888	0.0288738	0.659788		-0.00199536	0.153075	0.693476
RAB3IL1	11		-0.000732245	0.352045	0.885391		0.00163667	0.0288225	0.659788		0.00146751	0.108704	0.638647
DENND6B	22		0.000816565	0.356573	0.887311		-0.0017683	0.0288075	0.659788		-0.00147445	0.158383	0.701277
WNK1	12		0.00255863	0.403212	0.898798		0.00687282	0.0290372	0.659788		0.00392116	0.307349	0.818312
SOX4	6		-0.00121207	0.411241	0.901996		-0.00287605	0.0290749	0.659788		0.000570145	0.731517	0.952904
OSBPL10	3		0.000584044	0.414978	0.903262		0.001451	0.0283699	0.659788		-0.000278956	0.732178	0.952904
RASL10B	17		0.000723216	0.477564	0.922215		0.00217208	0.0288048	0.659788		-0.00110038	0.36509	0.837194
ZNF398	7		-0.000494087	0.583338	0.942276		-0.00187034	0.0288976	0.659788		-0.000989489	0.349473	0.833111
OR2T5	1		0.000350399	0.735992	0.974239		-0.00204832	0.0289778	0.659788		-0.0037041	0.00148397	0.0742687
FRMPD2	10		0.000216421	0.781197	0.979292		0.00168554	0.0285035	0.659788		0.000754104	0.434852	0.868807
TSPAN17	5		0.000173586	0.828166	0.983924		-0.00169085	0.028668	0.659788		-0.0024693	0.00922291	0.232078
ST3GAL6	3		0.000126825	0.87199	0.988952		0.00171562	0.0284551	0.659788		0.000764663	0.416891	0.860215
CCR6	6		0.000114863	0.87916	0.989362		-0.00138085	0.0287611	0.659788		-0.0012633	0.105419	0.633485
PLSCR5	3		-4.47e-05	0.954122	0.996356		0.00169001	0.0290908	0.659788		0.00198206	0.0412087	0.456016
IL6R	1		-4.45e-05	0.960539	0.996474		0.00192731	0.0286684	0.659788		0.00202094	0.0640039	0.542153
KRTAP5.1	11		-4.42e-05	0.964813	0.996537		-0.00199633	0.0289561	0.659788		-6.34e-06	0.995698	0.99908
RS1	X		0.00637384	4.04e-13	6.06e-10		0.00159539	0.0293016	0.662102		-0.00670996	6.31e-12	3.79e-08
ZNF449	X		0.00470518	4.25e-10	1.32e-07		0.00145369	0.0293241	0.662102		-0.00406011	3.19e-06	0.000710306
DLG4	17		0.00360766	0.00333904	0.106289		0.00237508	0.0295651	0.662102		-0.00277795	0.0499781	0.487259
PRKCA	17		-0.00234722	0.0215955	0.379227		-0.00208158	0.0296299	0.662102		0.00173989	0.138317	0.678997
GNG3	11		0.00244114	0.0252014	0.412027		0.00215515	0.0295513	0.662102		-0.00078465	0.527942	0.899507
CXCL5	4		0.00121599	0.110382	0.697332		0.00162413	0.0295863	0.662102		-0.000577311	0.522225	0.898056
KBTBD11	8		-0.00108593	0.202964	0.808726		-0.00177114	0.0296562	0.662102		0.00091436	0.367879	0.838504
ALDH1B1	9		-0.00085477	0.350568	0.884866		-0.00181305	0.0296403	0.662102		-0.000823771	0.43736	0.87022
CSTB	21		0.000697808	0.546626	0.93449		-0.00221123	0.0295928	0.662102		-0.00152625	0.237182	0.774802
PXT1	6		-0.000477856	0.555352	0.936254		0.00170992	0.0296492	0.662102		0.00138205	0.157819	0.699834
LRRC28	15		0.000530381	0.56616	0.937718		-0.00182277	0.02941	0.662102		-0.00145913	0.170975	0.716819
OR10V1	11		0.000173221	0.820462	0.983193		0.00157486	0.029463	0.662102		-0.000293947	0.736502	0.953065
PRR32	X		0.00443999	4.24e-07	4.22e-05		0.00171662	0.0299514	0.662764		-0.00336099	0.000938525	0.0534117
PSMD10	X		0.00561182	5.86e-05	0.00323756		0.0030328	0.0304169	0.662764		-0.00533457	0.00275211	0.112563
LRIG3	12		-0.00231479	0.0288322	0.444371		-0.00195723	0.03021	0.662764		0.0024372	0.0325086	0.41569
HMGB1	13		-0.00517334	0.0527639	0.562756		-0.00585206	0.0299056	0.662764		0.00149885	0.652231	0.933274
BEND7	10		-0.00163089	0.138148	0.735793		-0.0021663	0.0299714	0.662764		-0.00133735	0.277167	0.798299
FSTL3	19		-0.00135818	0.15452	0.756191		-0.00193182	0.0302293	0.662764		-0.00110956	0.317516	0.820692
TRPS1	8		0.00117472	0.229988	0.835604		0.00210458	0.0304952	0.662764		0.00137226	0.252878	0.78195
ANGEL1	14		-0.000981707	0.237588	0.838571		-0.00187371	0.0299175	0.662764		0.00100647	0.354045	0.833154
KRTAP12.2	21		0.00081137	0.309489	0.870019		-0.00160515	0.0304435	0.662764		-0.0022132	0.0170683	0.313475
DBF4	7		0.00249756	0.335649	0.879371		0.00560424	0.030408	0.662764		-0.000940524	0.7665	0.959892
SCGB2A1	11		0.000835537	0.368498	0.89129		0.0020344	0.0298794	0.662764		-0.000432321	0.699099	0.945919
PAG1	8		-0.000620173	0.382573	0.892945		0.0014268	0.0302898	0.662764		0.00139323	0.0893976	0.603928
RPS21	20		-0.00176176	0.376655	0.892945		-0.00406324	0.0298266	0.662764		-0.0011259	0.627522	0.926112
PRRG2	19		-0.00067427	0.442508	0.912719		-0.0017511	0.0304914	0.662764		0.000736756	0.472298	0.880792
PTPRCAP	11		0.000621048	0.51555	0.928678		0.00190547	0.030063	0.662764		8.53e-05	0.936898	0.991236
ZBTB2	6		0.000741818	0.572757	0.939974		-0.00258784	0.0303356	0.662764		-0.000162502	0.917659	0.98755
ZNF668	16		0.00036428	0.680066	0.963247		-0.00167156	0.0302089	0.662764		-0.00194419	0.0472418	0.475231
LRP2	2		0.000327605	0.713548	0.970801		0.0018646	0.0297753	0.662764		0.000190714	0.85399	0.976739
TMUB1	7		0.000198437	0.803577	0.980765		-0.00160363	0.0301644	0.662764		-0.000880888	0.341603	0.830581
YY1	14		0.000304476	0.896055	0.991125		-0.00486162	0.0304825	0.662764		-0.00630725	0.0241455	0.365572
PDIA4	7		-7.34e-05	0.937941	0.995046		-0.00201894	0.0304792	0.662764		-0.00152691	0.191681	0.738124
BMT2	7		1.02e-05	0.989259	0.998706		0.00152655	0.0301276	0.662764		0.000462577	0.594318	0.918093
TRPC5	X		0.00514299	2.32e-11	1.19e-08		0.00137923	0.0309889	0.664451		-0.00455596	6.32e-08	2.92e-05
SYF2	1		0.00519445	0.0104056	0.240975		0.00433079	0.0307411	0.664451		-0.00361257	0.147125	0.689423
CNOT11	2		-0.0042613	0.0220904	0.383383		-0.00385503	0.0310045	0.664451		0.00534159	0.0164473	0.30778
FBXL15	10		0.00166016	0.0883444	0.649144		0.0019609	0.0310621	0.664451		-0.000633344	0.577824	0.914026
MYL7	7		-0.0013356	0.16527	0.764848		0.00196203	0.0310891	0.664451		0.000293342	0.787677	0.964233
CLEC18B	16		-0.00133756	0.213215	0.818076		-0.00225719	0.0307619	0.664451		-0.000953035	0.463026	0.879119
ADGRD1	12		0.000788757	0.389966	0.894899		-0.00174741	0.0308996	0.664451		-0.00231747	0.025006	0.370823
HOXB13	17		-0.000836892	0.467324	0.918769		-0.00241493	0.0309696	0.664451		0.0011678	0.40763	0.855956
C11orf24	11		0.000638211	0.527352	0.931201		0.00212969	0.0309265	0.664451		0.00150127	0.214091	0.760715
PPM1G	2		0.00105972	0.549143	0.935205		-0.003339	0.0308312	0.664451		-0.00692513	0.000386267	0.0287577
CMKLR2	2		-0.000315966	0.67939	0.963196		-0.0015473	0.0307197	0.664451		-0.00044845	0.613874	0.922598
MAB21L3	1		-0.000297544	0.702139	0.969177		0.00167386	0.0306785	0.664451		0.003377	0.000521445	0.0357414
KL	13		-0.000184977	0.828519	0.983924		-0.00170671	0.0310732	0.664451		-0.00119643	0.235896	0.77399
KRAS	12		-9.98e-05	0.965364	0.996772		0.0059681	0.0308266	0.664451		0.00254693	0.43009	0.867901
TMEM14B	6		-0.000783665	0.220922	0.825113		-0.00131822	0.0312026	0.665298		0.00101303	0.189094	0.734845
BEND3	6		0.000327545	0.797785	0.980044		0.00257975	0.0311969	0.665298		0.000723049	0.624328	0.925073
NINL	20		-0.000586759	0.454682	0.915609		-0.00170007	0.03131	0.665322		-0.00100699	0.304407	0.815055
HBM	16		0.000337979	0.721467	0.970801		-0.00185869	0.0312522	0.665322		-0.000992414	0.367519	0.838504
FEZ1	11		-0.000117595	0.895576	0.991125		-0.00175821	0.0313145	0.665322		-0.00271513	0.00864264	0.226337
CXCR3	X		0.00330097	2.59e-06	0.000199342		0.00133543	0.031647	0.665335		-0.00288028	0.000296045	0.0230902
PSMD2	3		-0.00680677	0.0109667	0.249164		-0.00537568	0.0316513	0.665335		0.00255934	0.40675	0.855224
PRMT5	14		0.00484871	0.106975	0.690707		0.00616856	0.0314717	0.665335		-0.00653888	0.0645782	0.544459
OBI1	13		-0.00137276	0.181748	0.786101		-0.00195612	0.0314325	0.665335		0.000609239	0.592248	0.917711
AAK1	2		0.00127118	0.196102	0.801567		0.00202749	0.0316712	0.665335		-0.00254571	0.0232095	0.361109
SEC61B	9		0.00247901	0.219571	0.823333		0.00419506	0.031691	0.665335		0.000282377	0.906731	0.985307
RBP2	3		0.00100396	0.232765	0.836402		0.00166718	0.0317213	0.665335		0.000356935	0.716764	0.949903
ROM1	11		0.000578037	0.41126	0.901996		0.00144429	0.0315894	0.665335		0.000938408	0.263719	0.788784
MIB2	1		-0.000789984	0.44114	0.912203		-0.00204641	0.0315877	0.665335		-0.00261151	0.0247384	0.370366
GALNS	16		-0.000471081	0.678642	0.963196		-0.00226901	0.0314946	0.665335		-0.00134517	0.311639	0.818733
SPEF1	20		0.000210796	0.855241	0.987686		-0.00231027	0.0314968	0.665335		-0.00326251	0.0146372	0.293347
URB1	21		0.00168251	0.51562	0.928678		0.00532859	0.0317703	0.665587		0.00173608	0.567051	0.911321
CCDC106	19		-0.000925309	0.564719	0.937679		-0.0031504	0.0318139	0.665726		-0.000525162	0.778079	0.961374
TBC1D25	X		0.00453365	5.61e-08	7.66e-06		0.00150548	0.0320439	0.66905		-0.00372729	6.01e-05	0.00652289
ELMOD3	2		0.00113594	0.299545	0.866887		0.00214484	0.032047	0.66905		-0.00110714	0.370964	0.839438
SMOC2	6		-0.00135362	0.0413746	0.514752		-0.00131798	0.0321389	0.670192		0.00176414	0.0243538	0.367161
ANKRD49	11		0.00627857	0.0497403	0.55251		0.00675801	0.0322882	0.670865		-0.0012713	0.745209	0.95527
ZDHHC13	11		-0.000841394	0.2058	0.810359		-0.00133516	0.0323379	0.670865		0.00181514	0.0217896	0.353042
GLOD4	17		0.000818928	0.382396	0.892945		-0.00185732	0.0323573	0.670865		-0.000518108	0.647188	0.93137
DLEC1	3		0.000564423	0.43469	0.910477		0.00157521	0.0322347	0.670865		0.000279833	0.76007	0.958131
SGK3	8		-7.61e-05	0.909113	0.993286		0.00134409	0.0322752	0.670865		0.00140844	0.0688273	0.554565
PSIP1	9		-0.00118959	0.365172	0.890901		-0.00248195	0.0324537	0.671317		-0.000727717	0.612869	0.922134
BARHL2	1		-0.000270834	0.781683	0.979292		0.00213815	0.0324485	0.671317		0.00177583	0.147141	0.689423
MID2	X		0.00750704	1.15e-12	1.22e-09		0.00182307	0.0330718	0.67253		-0.00547821	2.98e-06	0.000679913
CYSLTR1	X		0.00378036	8.33e-08	1.08e-05		0.00134969	0.0328756	0.67253		-0.00340379	2.74e-05	0.0034228
POLR2C	16		-0.00680406	0.00714118	0.186198		-0.00492989	0.0329109	0.67253		0.00180701	0.526143	0.898671
GAS2L2	17		0.00338028	0.00788328	0.200046		0.00254366	0.0330377	0.67253		-0.00139482	0.353546	0.833154
ATXN2L	16		-0.00242246	0.0778798	0.628544		-0.00274944	0.0328062	0.67253		-0.00122295	0.430747	0.867901
RASSF2	20		-0.00153085	0.0803431	0.634513		-0.00174801	0.0332877	0.67253		-0.00030615	0.759753	0.958039
ZFP3	17		0.00103233	0.233609	0.837065		-0.00164285	0.0327603	0.67253		-0.00123554	0.213237	0.759223
TMEM178B	7		0.00116154	0.242092	0.839772		-0.00191093	0.0326823	0.67253		-0.00246621	0.0321296	0.41378
OGFR	20		0.00162748	0.256941	0.849721		-0.00281138	0.0331066	0.67253		-0.00182104	0.291364	0.807975
ADAMTS12	5		-0.00107649	0.300561	0.866887		-0.00208485	0.033069	0.67253		0.00102825	0.399261	0.852168
ADAM33	20		-0.00096913	0.362282	0.889421		-0.00209307	0.0330166	0.67253		-0.000784145	0.522845	0.898179
FDXACB1	11		-0.000577061	0.407007	0.901035		0.00157975	0.0328941	0.67253		0.000758586	0.397587	0.851512
TMEM50A	1		-0.000554925	0.531448	0.932307		-0.0016795	0.0332961	0.67253		0.000603735	0.546785	0.905379
NAPA	19		0.00204033	0.53191	0.932644		0.00636221	0.0330259	0.67253		0.000982993	0.787044	0.964101
ZNF107	7		-0.000483206	0.531957	0.932644		-0.00146598	0.0329797	0.67253		0.000215324	0.802465	0.967861
WDR77	1		0.00180172	0.561158	0.937454		0.00620538	0.0332495	0.67253		-0.00220202	0.536786	0.901619
PWWP2B	10		-0.000373933	0.688696	0.965726		-0.0018341	0.0330199	0.67253		4.79e-05	0.965317	0.996527
DNAI7	12		-0.00027001	0.7481	0.976036		0.00240665	0.0327511	0.67253		0.00207459	0.132071	0.67237
GJA8	1		-0.000260251	0.78554	0.979735		0.00201024	0.0332352	0.67253		0.00139236	0.230797	0.771449
TXNDC17	17		0.000181556	0.905913	0.992432		-0.00289897	0.0331124	0.67253		0.00136207	0.447323	0.874597
KIT	4		4.76e-05	0.958329	0.996393		0.00209061	0.0331529	0.67253		-0.000267261	0.822156	0.971521
PAFAH1B1	17		0.00455965	0.144358	0.745695		0.00595101	0.0333918	0.673707		0.00681214	0.0501452	0.488624
IL5RA	3		-0.0012761	0.0869782	0.646311		-0.00147724	0.0335678	0.674989		-0.000119042	0.889896	0.981594
NMU	4		-0.000187675	0.790824	0.980022		0.00157201	0.0334981	0.674989		0.00121511	0.179135	0.725112
MRAP2	6		-0.000158141	0.838106	0.985377		0.00156252	0.0335483	0.674989		0.000539461	0.546387	0.905135
WASHC3	12		-0.000715697	0.644083	0.953676		-0.00317237	0.0337404	0.676491		-0.000849085	0.653393	0.933822
SLC9A2	2		5.85e-05	0.935422	0.995046		0.00144134	0.0337551	0.676491		-0.000216607	0.792216	0.965928
DEFB135	8		-5.48e-05	0.940281	0.995093		-0.00149547	0.033745	0.676491		-0.00128811	0.142971	0.687986
USP13	3		0.00133681	0.127762	0.723181		0.00174114	0.0338958	0.677005		-0.00243092	0.0179949	0.321486
LST1	6		0.00113663	0.378216	0.892945		0.00262517	0.0339202	0.677005		-0.00224398	0.133002	0.673684
MAPK11	22		-0.000554263	0.482067	0.922887		-0.0015106	0.0338362	0.677005		-0.00126513	0.148375	0.689971
SNRNP25	16		0.00137633	0.605115	0.949031		0.00551358	0.0339311	0.677005		0.00576755	0.0716552	0.561669
CORO1B	11		-0.00028549	0.776693	0.978473		0.00211287	0.0340195	0.67802		0.0015113	0.205545	0.751678
SLC25A53	X		0.00411103	1.24e-07	1.48e-05		0.00147324	0.0356076	0.679428		-0.00216778	0.0155121	0.29978
VSIG4	X		0.00315424	1.89e-06	0.000149828		0.0012772	0.034843	0.679428		-0.0022185	0.00318156	0.123954
ACTRT1	X		0.00312289	5.96e-05	0.00325327		0.00148156	0.0351598	0.679428		-0.00200671	0.0231685	0.360785
ITGB4	17		-0.00305935	0.00145511	0.0549616		-0.00194074	0.0342421	0.679428		0.00146276	0.193612	0.73927
AHCY	20		-0.00776618	0.00415137	0.123094		-0.00552794	0.0358212	0.679428		0.00723873	0.0249133	0.370701
TOB2	22		-0.00158693	0.0372373	0.492227		-0.0014864	0.0351521	0.679428		0.00074686	0.398446	0.851673
EFCAB11	14		-0.00145534	0.0589603	0.583693		-0.00154051	0.0354756	0.679428		0.00056784	0.532544	0.90149
PRND	20		-0.00153503	0.0658141	0.603696		-0.00165828	0.0351437	0.679428		-0.000592979	0.541452	0.903858
LMX1A	1		-0.00131971	0.0678489	0.605765		-0.00144025	0.0357959	0.679428		-0.00023357	0.782169	0.961842
CAPN1	11		0.00191199	0.0706119	0.613824		0.002204	0.0357691	0.679428		-0.00221395	0.0824321	0.587724
PMPCB	7		0.00510812	0.0739791	0.620811		0.00585432	0.0346778	0.679428		0.000195379	0.95518	0.994584
ETFRF1	12		-0.0014894	0.0966046	0.668879		-0.00179066	0.0354307	0.679428		0.000864379	0.415438	0.859917
TRMT9B	8		-0.0012929	0.0976762	0.670668		-0.00154566	0.0358124	0.679428		0.000194197	0.831076	0.9719
RBFOX1	16		-0.00135935	0.113017	0.701424		-0.00165373	0.0345635	0.679428		0.000784387	0.425526	0.86561
INKA2	1		-0.00148507	0.118084	0.709607		0.00194668	0.035586	0.679428		0.00184026	0.0940239	0.613778
VPS37D	7		0.00125359	0.117876	0.709607		0.00163075	0.0356369	0.679428		-0.000808582	0.400666	0.852984
LOXL4	10		0.00131922	0.122596	0.715513		0.00170317	0.0349982	0.679428		-0.00112198	0.265785	0.789597
ANKFN1	17		-0.00139979	0.127487	0.722973		-0.00180121	0.034865	0.679428		0.000678943	0.522152	0.898056
REG3A	2		0.000978401	0.161243	0.758807		0.00132203	0.0351516	0.679428		0.000315987	0.687518	0.94348
CCDC39	3		0.00145091	0.170605	0.773216		0.0020787	0.0352129	0.679428		-0.00146244	0.234725	0.773629
CAVIN3	11		-0.000983181	0.208027	0.814256		-0.00151702	0.03457	0.679428		0.00123311	0.175428	0.721231
SYNJ2BP	14		0.000814223	0.244915	0.840869		0.00135177	0.0350926	0.679428		0.000806246	0.326835	0.824568
RNF151	16		0.00109598	0.255191	0.848275		-0.00181818	0.0357373	0.679428		-0.00139042	0.216223	0.762253
UNC5B	10		0.00122812	0.267775	0.85502		0.00224389	0.0358939	0.679428		0.000310613	0.820315	0.971367
TMED2	12		0.00299476	0.28376	0.864033		-0.00545669	0.0352647	0.679428		-0.00998388	0.00164651	0.0801175
LAD1	1		-0.000925123	0.304614	0.867841		-0.00169723	0.0349713	0.679428		-0.000940473	0.348358	0.832851
OXT	20		-0.00084496	0.323754	0.875706		-0.00168903	0.0356517	0.679428		-0.00167261	0.0901745	0.605451
ABHD18	4		-0.000747475	0.403637	0.898818		0.00183717	0.0359011	0.679428		0.00207729	0.0564955	0.515342
HELZ	17		-0.000950749	0.424971	0.907166		-0.00246547	0.0353329	0.679428		-0.00105905	0.465703	0.87914
FAM181B	11		-0.000664411	0.464979	0.918752		-0.0017882	0.03554	0.679428		0.00127038	0.232073	0.772063
SUDS3	12		-0.00128801	0.465715	0.918769		-0.00342428	0.0343092	0.679428		-0.00158399	0.433145	0.868528
GLMN	1		-0.00110817	0.472378	0.920486		0.00349637	0.0342929	0.679428		0.00102625	0.599481	0.919299
LGALS13	19		0.000531984	0.498903	0.924447		0.00161688	0.0356031	0.679428		0.000942952	0.332538	0.826733
RHOG	11		-0.000689716	0.501225	0.924447		-0.00209477	0.0342132	0.679428		0.000196753	0.873588	0.981024
TERF2IP	16		-0.000725344	0.537665	0.933969		-0.00214417	0.0349076	0.679428		-0.000138501	0.913034	0.986612
DISC1	1		-0.000554884	0.542542	0.934243		-0.00172841	0.0343825	0.679428		-0.000743736	0.475163	0.882216
RPL26L1	5		0.00112649	0.548905	0.9351		-0.00373839	0.0357272	0.679428		-0.00339919	0.126718	0.666395
ZNF584	19		0.000447643	0.610008	0.950244		-0.00167368	0.0345677	0.679428		-0.00175979	0.0755387	0.573059
RCAN1	21		-0.000506301	0.617147	0.950685		-0.00188216	0.0357427	0.679428		-0.0014666	0.190515	0.736747
LMNTD1	12		0.000301743	0.676105	0.962876		0.0020798	0.0348132	0.679428		0.00148175	0.22147	0.765073
CFC1	2		-0.000384573	0.682915	0.964322		-0.00189088	0.0359469	0.679428		0.000862142	0.462716	0.879119
NRDC	1		0.000533716	0.698395	0.968922		0.00303583	0.0343333	0.679428		0.00104026	0.541302	0.903827
OSBPL5	11		-0.000226363	0.715432	0.970801		-0.00121297	0.0352766	0.679428		-0.000186311	0.798071	0.966837
MAP3K19	2		0.00033425	0.717259	0.970801		0.0020321	0.0348438	0.679428		-0.000167785	0.885317	0.981594
CHERP	19		0.000471576	0.862198	0.988534		0.00525541	0.0348797	0.679428		0.00403375	0.191795	0.738124
LGALS7B	19		-0.000150163	0.910495	0.993286		-0.00264608	0.0347875	0.679428		0.00166136	0.322582	0.82245
XKR6	8		0.000102604	0.913391	0.993286		-0.001885	0.0359757	0.679428		-0.000417484	0.715327	0.948862
NHLRC4	16		5.76e-05	0.949357	0.995787		-0.00178951	0.0352877	0.679428		-0.00198384	0.0634718	0.540952
LGALS9	17		-4.98e-05	0.956104	0.996356		0.00191008	0.0359285	0.679428		0.000339214	0.757422	0.957416
RGS5	1		-4.45e-05	0.96134	0.996474		0.00184836	0.034912	0.679428		0.00152609	0.168073	0.712666
WTAP	6		0.000499069	0.848949	0.987511		0.00547136	0.0361739	0.682456		0.00768309	0.0163127	0.306994
TXLNG	X		0.00799464	2.95e-11	1.44e-08		0.00203197	0.0364407	0.682909		-0.00834873	9.74e-11	2.93e-07
CNKSR2	X		0.00480347	5.2e-07	4.96e-05		0.00174078	0.0364712	0.682909		-0.00445353	3.63e-05	0.00425233
FRMD6	14		-0.00211159	0.0395017	0.502129		-0.00206718	0.0365391	0.682909		0.0016678	0.169749	0.715298
C20orf141	20		-0.00136039	0.0499915	0.553257		-0.00134364	0.0364388	0.682909		3.43e-05	0.96537	0.996527
SLC16A5	17		-0.00217922	0.0815709	0.638681		-0.00232653	0.0363795	0.682909		-0.000211526	0.874641	0.981024
KCNJ8	12		-0.00112195	0.177587	0.781635		0.00188567	0.0365025	0.682909		0.00128267	0.241504	0.777008
LYSMD1	1		0.00098302	0.317425	0.87368		0.00204076	0.0363676	0.682909		-0.000796424	0.497399	0.89073
KCTD9	8		0.000837036	0.544023	0.93449		-0.0027348	0.0363059	0.682909		-0.00298568	0.0745309	0.569717
RPL36A	X		0.000733283	0.754597	0.977053		-0.00469377	0.036438	0.682909		-0.00314421	0.275068	0.796257
ITGB6	2		-0.00149131	0.0977745	0.670674		-0.00179902	0.0366026	0.683387		0.000624583	0.561456	0.909608
RNASEH2C	11		-0.00106271	0.641002	0.953323		-0.00442113	0.0366458	0.683485		-0.0020534	0.43422	0.868528
TNFAIP8L1	19		1.6e-05	0.985761	0.998584		-0.00170474	0.0367136	0.684043		-0.000549374	0.602709	0.920821
LPAR4	X		0.00313279	1.56e-05	0.000986774		0.00141449	0.0368117	0.68432		-0.00234138	0.00567492	0.178159
MUC12	7		-0.00165654	0.0846254	0.642529		-0.00182812	0.0368804	0.68432		0.00109419	0.320759	0.821524
ZNF860	3		0.001198	0.111115	0.698275		0.00146315	0.036794	0.68432		-0.000632069	0.466493	0.879449
DRAM2	1		-0.000649647	0.54603	0.93449		0.00227153	0.0368438	0.68432		0.000763153	0.561621	0.909712
FAM71B	5		-0.00123705	0.08614	0.645957		-0.00143904	0.0369708	0.684911		-0.000190243	0.821833	0.971518
AIRE	21		0.000870104	0.241586	0.839734		-0.00147673	0.0369883	0.684911		-0.000504499	0.572489	0.912134
MBOAT7	19		-0.00241369	0.00905604	0.220788		-0.00185517	0.0370515	0.685377		0.000268559	0.803867	0.968299
WNT9B	17		-0.00228592	0.0312462	0.463344		-0.0020137	0.037093	0.685436		0.0014662	0.225451	0.76877
KLRC1	12		-0.000898544	0.17496	0.778264		-0.0012738	0.0371551	0.685436		-0.000582761	0.444835	0.87369
PDE4C	19		-0.00120954	0.196898	0.80165		-0.00189406	0.0372069	0.685436		0.00176604	0.131007	0.670419
LRATD1	2		-0.000183114	0.857855	0.988074		-0.00197681	0.0371994	0.685436		-0.00129706	0.268482	0.790557
CENPB	20		-0.000845232	0.543487	0.934463		-0.00261799	0.0373154	0.686733		-0.00202538	0.192305	0.738425
RPP40	6		-0.00189604	0.499141	0.924447		-0.00575614	0.0374015	0.687615		-0.00214977	0.52811	0.899525
LIMK2	22		-0.00184619	0.0287665	0.443739		-0.00169456	0.0375286	0.688547		0.000199974	0.842326	0.974344
BAD	11		0.00034257	0.762306	0.977344		0.00227166	0.0375241	0.688547		0.00120823	0.368168	0.838514
MARCHF4	2		0.000927091	0.352257	0.885391		-0.00184359	0.0376928	0.690243		-0.000201656	0.860999	0.978467
CRACD	4		0.000549169	0.628773	0.952633		0.00229108	0.0376977	0.690243		0.00109588	0.418473	0.861201
LZTS2	10		0.00109437	0.234132	0.837501		0.0017746	0.0378601	0.69041		-0.000587075	0.581145	0.914026
WDR27	6		-0.000421503	0.459815	0.916256		-0.00115978	0.0378472	0.69041		-0.000542752	0.430466	0.867901
NPHP3	3		0.00016146	0.81606	0.98314		0.00130722	0.0377661	0.69041		0.00128451	0.107981	0.63819
COL25A1	4		-0.000162508	0.861413	0.988421		-0.0017764	0.0378596	0.69041		-0.000930917	0.388878	0.84732
H2AC6	6		0.000447933	0.629492	0.952633		-0.00179524	0.0379647	0.691618		-0.00115316	0.29084	0.807975
ZBED1	X		0.000763185	0.432804	0.91018		-0.00183771	0.0380305	0.692116		-0.00326942	0.00319224	0.123954
OPHN1	X		0.00322786	5.66e-06	0.000395154		0.0014812	0.0382407	0.693684		-0.00302985	0.000843461	0.0510668
GPR183	13		-0.00143607	0.0285351	0.442062		-0.00124588	0.0382474	0.693684		-0.000271176	0.720574	0.951054
GABPB1	15		-0.00408978	0.0910904	0.657307		-0.00479811	0.0382482	0.693684		0.000681647	0.808529	0.968697
TNFRSF25	1		-0.000612103	0.551469	0.936077		-0.00196312	0.0382706	0.693684		0.000616284	0.607685	0.921112
STS	X		0.00495238	5.91e-08	7.89e-06		0.00160966	0.0384111	0.695141		-0.00336538	0.000888986	0.052687
EOLA2	X		0.00271417	0.00591958	0.163487		0.00193745	0.0384872	0.695141		-0.000556589	0.636416	0.928173
LMOD1	1		0.00133961	0.147449	0.746861		0.00177655	0.0386345	0.695141		-0.00120486	0.262673	0.788268
TMED9	5		0.00161106	0.178413	0.781977		-0.0022092	0.0388526	0.695141		-0.000771742	0.579377	0.914026
NRBP1	2		0.00276672	0.331624	0.878952		0.00587618	0.0384691	0.695141		0.00517382	0.144444	0.688842
RBM28	7		0.00171709	0.387355	0.894143		0.00392279	0.0387234	0.695141		-0.000356511	0.877668	0.981044
KDF1	1		-0.000762555	0.564513	0.937679		-0.00242487	0.0387487	0.695141		-0.00207857	0.153967	0.695418
AZIN2	1		0.000325972	0.722315	0.971118		0.00179063	0.038708	0.695141		-0.00033277	0.751909	0.955995
STK24	13		-0.000311836	0.759868	0.977344		-0.00197516	0.0387917	0.695141		-0.00134429	0.252912	0.78195
PGBD2	1		0.000391094	0.775756	0.978473		-0.00259678	0.0385913	0.695141		-0.00406309	0.0101092	0.245025
RPL6	12		-0.000541615	0.786145	0.979735		-0.0042071	0.0388503	0.695141		-0.00576897	0.0219553	0.354133
DROSHA	5		0.000277006	0.857204	0.987956		-0.00291394	0.0388338	0.695141		-0.00391699	0.0257576	0.376684
FAT1	4		8.66e-05	0.922741	0.993903		-0.00165633	0.0385548	0.695141		-0.00128846	0.196184	0.742348
SETD4	21		0.000880289	0.244298	0.840518		-0.00141966	0.0389164	0.695593		-0.000931828	0.282887	0.801843
NKG7	19		-0.00151689	0.0503894	0.55527		-0.00147471	0.0394685	0.700043		0.000994387	0.271249	0.792973
PGP	16		-0.00314998	0.0747904	0.622632		-0.00346915	0.0394131	0.700043		0.00136207	0.50643	0.893203
MDH2	7		-0.00234598	0.122701	0.715513		0.00304468	0.0393331	0.700043		0.00422619	0.0186897	0.3282
HNRNPUL1	19		0.00108963	0.236571	0.838571		0.00188151	0.0394276	0.700043		0.000678996	0.55224	0.907704
SLC5A10	17		0.000944781	0.315173	0.872947		0.00180098	0.039554	0.700043		0.000115809	0.917328	0.98755
COL6A2	21		-0.000759415	0.469341	0.918769		-0.00205136	0.0392646	0.700043		-0.00186462	0.128533	0.667292
DENND1A	9		-0.000684502	0.546352	0.93449		-0.00211862	0.0392259	0.700043		-0.000553001	0.670663	0.939542
RAB21	12		-0.000546641	0.673078	0.962296		-0.00253665	0.0395396	0.700043		-0.000453926	0.769305	0.960472
EEF2	19		0.00111829	0.7298	0.972102		0.00623679	0.039527	0.700043		-0.0002784	0.941639	0.99217
MAGOH	1		-0.000213027	0.947004	0.995463		-0.00630799	0.0394049	0.700043		0.00291229	0.453857	0.875873
OR2W1	6		-0.0012189	0.121537	0.714523		-0.00151577	0.0396842	0.700971		0.00112209	0.235478	0.77399
TMEM39B	1		-0.00172924	0.164885	0.763801		-0.00232511	0.0396542	0.700971		-0.000613615	0.657827	0.935519
TPH1	11		0.0010879	0.229756	0.835604		-0.00163018	0.03977	0.701798		-0.00196709	0.0531941	0.501941
ZNF843	16		0.000642471	0.460803	0.917075		0.00174779	0.0398268	0.701971		0.00240579	0.0263219	0.380002
PLK2	5		-0.000287725	0.772327	0.978473		-0.00182086	0.0398577	0.701971		0.000340693	0.759733	0.958039
GABPA	21		-0.00391932	0.0339241	0.475792		-0.00366758	0.0399265	0.702304		0.00157482	0.470515	0.880151
UHRF2	9		-0.00102566	0.272316	0.856575		-0.00179117	0.0399546	0.702304		0.000680406	0.537651	0.901641
ARL1	12		0.000608661	0.456616	0.915665		0.00157926	0.0402626	0.704282		0.000820578	0.388594	0.84732
HNRNPD	4		-0.000856826	0.512488	0.927168		0.00275261	0.0402621	0.704282		0.00034842	0.825154	0.971542
LNX1	4		-0.000469264	0.641668	0.953323		0.00210574	0.0402517	0.704282		0.00204419	0.10707	0.637494
TRMT1L	1		-0.000496201	0.646516	0.954482		-0.00199009	0.0402439	0.704282		-0.00179339	0.139488	0.681723
OTUD3	1		-0.000379849	0.678624	0.963196		-0.00175816	0.0401209	0.704282		-0.00108369	0.316807	0.820102
FAM9B	X		0.00397107	2.79e-10	9.29e-08		0.00115142	0.0403501	0.704446		-0.00352148	9.6e-07	0.000274592
IDH3B	20		0.00200486	0.0677514	0.605765		-0.00205343	0.0403185	0.704446		-0.00247344	0.0569175	0.516559
TMEM217	6		-0.000677289	0.319795	0.874372		-0.0013383	0.0404518	0.705537		0.00130322	0.113712	0.64678
CRYGC	2		0.000285489	0.794999	0.980044		-0.00203061	0.0405225	0.706087		-0.00134496	0.287592	0.806095
ZHX3	20		-0.0015621	0.0479295	0.542429		-0.00151177	0.040643	0.707502		0.00083932	0.361314	0.83567
MAP7D2	X		0.00475007	1.03e-07	1.27e-05		0.00160341	0.0430739	0.707538		-0.0024231	0.0196071	0.334527
SLC6A14	X		0.0046321	1.2e-07	1.44e-05		0.00153254	0.0419631	0.707538		-0.00368103	0.000188411	0.0163202
KDM5C	X		0.00731302	4.36e-07	4.31e-05		0.00263465	0.042986	0.707538		-0.00374938	0.0302332	0.402399
ESX1	X		0.0039358	1.68e-06	0.000134938		0.00144045	0.041293	0.707538		-0.00423866	3.9e-06	0.000784188
CFAP47	X		0.0027733	3.6e-06	0.000267006		0.00111629	0.0417178	0.707538		-0.00191023	0.00539041	0.170692
MAGEA12	X		0.00389956	4.22e-06	0.000305686		0.00153378	0.042572	0.707538		-0.00279065	0.00387717	0.142561
SPANXN3	X		0.00382037	8.7e-05	0.00446615		0.00176884	0.0415927	0.707538		-0.0033712	0.00216154	0.0956866
IDH3G	X		0.00321422	0.000697834	0.0287052		0.0017891	0.0424494	0.707538		-0.00137662	0.218246	0.763024
ZFP64	20		-0.00240963	0.00897472	0.219698		-0.00173294	0.0412685	0.707538		0.000791247	0.445929	0.874346
NME4	16		0.00257822	0.0132948	0.283805		-0.00203117	0.043266	0.707538		-0.00371195	0.00514871	0.167012
RHBDL2	1		-0.00226042	0.0137029	0.290111		-0.00177263	0.041487	0.707538		-0.000384107	0.714431	0.948857
PRKAG1	12		-0.00267824	0.0163595	0.324354		-0.00211768	0.0420175	0.707538		0.00137931	0.287376	0.806095
ARMC10	7		0.00222968	0.0164711	0.324683		0.00183103	0.0433418	0.707538		-0.00034554	0.764719	0.959344
RBBP8NL	20		0.00235166	0.0212632	0.377157		0.00181861	0.0429174	0.707538		-0.00176778	0.126311	0.665022
POLR3C	1		0.00517341	0.0342022	0.477261		0.00465651	0.0415311	0.707538		-0.00298706	0.291204	0.807975
TPMT	6		-0.00189199	0.0633831	0.595088		-0.00199199	0.0416292	0.707538		0.00157541	0.20883	0.755977
H1.1	6		-0.00179249	0.0782142	0.629636		0.0020482	0.0412667	0.707538		0.00104938	0.377654	0.842739
WDFY2	13		-0.00140057	0.112773	0.701092		-0.0018039	0.0428332	0.707538		0.000137261	0.901819	0.983111
CMPK2	2		-0.00223085	0.121241	0.714523		-0.00279162	0.0420666	0.707538		0.000370042	0.829692	0.9719
CTTN	11		0.00190608	0.124216	0.716838		0.00268929	0.0411498	0.707538		-0.00054139	0.725987	0.951496
JRKL	11		0.00145518	0.14416	0.745424		0.00186717	0.0431404	0.707538		-0.000175566	0.881604	0.981576
HDGFL1	6		-0.00161815	0.146023	0.74642		-0.00205057	0.041679	0.707538		0.000627789	0.615694	0.923336
TMED1	19		-0.00128597	0.19772	0.801925		-0.00187817	0.0433547	0.707538		0.000698831	0.557559	0.908282
KRTAP5.2	11		0.00120499	0.211981	0.817885		-0.00176169	0.0422567	0.707538		-0.00226335	0.0443426	0.463772
NUDT6	4		-0.000894235	0.221117	0.825113		-0.00136826	0.0423512	0.707538		0.00109584	0.202386	0.74836
HIF3A	19		-0.00120121	0.246732	0.840869		-0.00189108	0.043129	0.707538		-0.00101632	0.388869	0.84732
MAPK13	6		0.00089054	0.263501	0.853405		0.00154659	0.0421518	0.707538		0.00088909	0.350012	0.833154
CAPN12	19		-0.00100798	0.265133	0.854201		-0.00167391	0.0421397	0.707538		0.000419221	0.681124	0.942684
PCF11	11		0.00286665	0.266114	0.854929		-0.0049865	0.0410722	0.707538		-0.00559935	0.0659449	0.547778
TKFC	11		0.00101581	0.266885	0.854929		0.0018229	0.04198	0.707538		-0.000347834	0.753357	0.956135
SEL1L	14		-0.00105096	0.310352	0.870019		-0.00195839	0.0420565	0.707538		-0.000170514	0.884802	0.981594
S1PR4	19		-0.000788107	0.312541	0.871679		-0.00146488	0.0432148	0.707538		-0.000283986	0.752619	0.955995
ZNF891	12		0.000761305	0.318759	0.87368		-0.00138486	0.0421023	0.707538		-0.000854838	0.326536	0.82453
PLAC8L1	5		0.000810479	0.345188	0.881015		0.00168565	0.0415006	0.707538		2.25e-05	0.98243	0.996992
TMED5	1		0.000951903	0.349776	0.884866		0.00208466	0.0416998	0.707538		0.00153794	0.226453	0.768848
NOS1	12		-0.000686999	0.373769	0.892352		0.00153665	0.0423573	0.707538		0.000972758	0.290302	0.807949
NAA80	3		0.000876365	0.373818	0.892352		0.00188869	0.0419206	0.707538		-0.00103896	0.370081	0.839216
MBTD1	17		-0.00124212	0.383135	0.892945		-0.00268754	0.0426985	0.707538		0.00130422	0.437662	0.870445
DUS3L	19		-0.000670636	0.391116	0.894899		-0.00153123	0.042773	0.707538		-0.000847503	0.364058	0.836899
SPAG5	17		0.00135455	0.405026	0.899352		0.00330678	0.0432816	0.707538		0.00209008	0.301165	0.812603
DTX3L	3		-0.000601839	0.413751	0.903073		0.00143685	0.0429231	0.707538		0.001334	0.125216	0.663296
TMEM181	6		-0.000682578	0.450383	0.913294		-0.00163209	0.042915	0.707538		0.000910504	0.373866	0.840907
SCAMP5	15		-0.000631063	0.500034	0.924447		-0.001666	0.0432152	0.707538		-0.000373404	0.72389	0.951456
SYNE1	6		0.000505182	0.520578	0.930724		0.00145014	0.0426946	0.707538		0.000121089	0.893842	0.981594
SMIM3	5		0.000489292	0.528523	0.931201		-0.00144523	0.0420793	0.707538		-0.00177432	0.0450452	0.466385
SYNPO2L	10		0.000711504	0.533169	0.933153		0.00216055	0.0424575	0.707538		-0.00010463	0.936382	0.991236
STPG2	4		0.000504311	0.535305	0.933636		0.00157844	0.0422761	0.707538		-0.000672422	0.485377	0.886461
ALG2	9		0.00176515	0.548217	0.935044		0.00568642	0.0426025	0.707538		0.00303823	0.381151	0.844442
C6orf201	6		-0.000485148	0.554145	0.936254		-0.00147703	0.0411149	0.707538		-0.00105525	0.242836	0.777161
GDAP2	1		-0.000488153	0.590692	0.943952		0.00182471	0.043197	0.707538		0.00258375	0.0220446	0.354574
HADHB	2		0.000564284	0.618207	0.951238		-0.00206853	0.0415727	0.707538		-0.00230997	0.0714591	0.561311
RAD54B	8		0.000353974	0.621948	0.952536		0.00146225	0.0416875	0.707538		0.000426987	0.627185	0.926112
SIGLEC11	19		0.000656098	0.629182	0.952633		-0.00237382	0.043136	0.707538		-0.00166492	0.267962	0.790557
PPP1R17	7		-0.000298275	0.673938	0.962683		0.00131225	0.0431869	0.707538		0.000873098	0.285421	0.803955
CARF	2		-0.000332486	0.689768	0.966115		-0.00157494	0.042091	0.707538		-0.00100433	0.300321	0.811913
SIGLEC15	18		0.000368489	0.704651	0.969359		-0.00174753	0.0407817	0.707538		0.000745099	0.510285	0.89504
DMBX1	1		-0.000268796	0.761339	0.977344		-0.00166711	0.0412009	0.707538		0.000797159	0.448831	0.875019
SMC3	10		0.000716479	0.763861	0.977408		-0.00456842	0.0430318	0.707538		-0.00267586	0.354126	0.833154
APCDD1L	20		-0.000296999	0.776225	0.978473		-0.00194821	0.042887	0.707538		-0.000425056	0.722744	0.951297
ABHD17C	15		-0.000297389	0.780166	0.978958		-0.002011	0.0410633	0.707538		0.000271761	0.828004	0.971751
KRTAP13.2	21		-0.000221652	0.817611	0.98314		-0.00180066	0.0411972	0.707538		-0.000976601	0.375509	0.840907
AQP2	12		0.000242756	0.839422	0.985377		0.00227916	0.0426014	0.707538		0.00281866	0.0462937	0.472563
EHMT1	9		0.000290743	0.838877	0.985377		-0.00262705	0.0433441	0.707538		-0.00189727	0.257551	0.785559
TJP1	15		0.000183512	0.872937	0.988952		0.00225233	0.0418307	0.707538		0.0010397	0.44748	0.8747
IGBP1	X		0.000447434	0.877041	0.989112		-0.00553553	0.0419555	0.707538		-0.000647067	0.849828	0.975694
TMEM198	2		-0.000119835	0.889166	0.99087		-0.00168318	0.0411212	0.707538		-0.000418927	0.683327	0.943336
ARPP21	3		-7.01e-05	0.908636	0.993199		0.0012025	0.0415001	0.707538		0.000931313	0.203273	0.74886
CNTN3	3		-8.39e-05	0.908867	0.993286		0.00141368	0.0428361	0.707538		0.000574924	0.506644	0.893203
GOLGA6D	15		-0.000146279	0.91962	0.993795		-0.00253168	0.0415202	0.707538		-0.00348109	0.0251764	0.371501
SIDT2	11		-0.00204036	0.0205792	0.371146		-0.00166438	0.0435168	0.708478		0.000678618	0.505978	0.893203
CHRNB3	8		0.000370403	0.596846	0.945435		0.00135275	0.0435303	0.708478		-0.000584938	0.48806	0.886692
BASP1	5		6.01e-05	0.948942	0.995463		-0.00173443	0.0434524	0.708478		0.000458483	0.667611	0.938541
SLC25A4	4		0.00024581	0.742608	0.974903		-0.00145175	0.0436396	0.709616		-0.00152769	0.0883213	0.601958
SLIT2	4		-0.0018997	0.0138053	0.291618		-0.00146453	0.0436792	0.709619		0.000847566	0.347232	0.832357
ESPNL	2		4.67e-05	0.953211	0.996356		-0.00140733	0.0438455	0.71168		-0.00119978	0.179469	0.725811
TFF3	21		0.00139454	0.0920577	0.659407		-0.00147683	0.0438925	0.711801		-0.00173426	0.0681357	0.552973
KCTD4	13		-0.002212	0.00326987	0.104914		-0.00143492	0.043997	0.7123		-0.000474696	0.584425	0.915103
RGS11	16		-0.00117588	0.0859135	0.645808		-0.00130912	0.0441074	0.7123		0.000563364	0.488354	0.886892
STMN3	20		0.00161232	0.0951892	0.666674		-0.00173083	0.0440872	0.7123		-0.00350151	0.0013748	0.0703687
BOLL	2		-0.000742726	0.326266	0.876836		-0.00145635	0.0441209	0.7123		0.000630241	0.488436	0.886933
WDR86	7		-0.000740024	0.551798	0.936222		-0.00223041	0.0440751	0.7123		-0.00197026	0.15532	0.698028
CTPS2	X		0.00557797	3.43e-12	2.94e-09		0.00130291	0.0443446	0.714459		-0.00607062	4.11e-12	3.7e-08
BEND5	1		-0.00218989	0.0124845	0.272977		-0.00168738	0.0444295	0.714459		0.00161772	0.116492	0.649296
MAPK14	6		-0.00423779	0.0168074	0.32915		-0.00332103	0.0443779	0.714459		0.00140621	0.475014	0.882211
ABR	17		0.00200104	0.0709398	0.613824		-0.00196321	0.044453	0.714459		-0.00206197	0.106212	0.635364
AMT	3		-0.000652407	0.475223	0.92115		-0.00170286	0.0444339	0.714459		-0.000150514	0.88923	0.981594
RPS6KA3	X		0.00396898	0.000380227	0.0167086		0.00198534	0.044687	0.715742		-0.00255547	0.0452742	0.467219
ZNHIT1	7		-0.00236509	0.218818	0.823027		-0.00365816	0.0446917	0.715742		-3.96e-05	0.986026	0.997295
NKAIN2	6		-0.000246124	0.749495	0.976191		0.0014945	0.0446258	0.715742		0.000280398	0.762847	0.958622
STOML1	15		-0.000258209	0.774285	0.978473		-0.00166384	0.0446343	0.715742		-0.0028502	0.00518186	0.167315
WNK3	X		0.00506427	8.27e-08	1.08e-05		0.00168132	0.0458621	0.716027		-0.00301812	0.00614154	0.188438
MTRNR2L10	X		0.00455453	2.94e-07	3.1e-05		0.00161148	0.0448844	0.716027		-0.002601	0.0120781	0.26668
USP17L10	4		-0.00364404	0.0249167	0.408484		-0.0031344	0.0449519	0.716027		0.00232602	0.221222	0.765073
ZNF350	19		-0.00201136	0.0358279	0.482458		-0.00178376	0.0451975	0.716027		0.00184627	0.10106	0.625919
HMGN4	6		-0.00137364	0.0441944	0.524885		-0.00127361	0.0457057	0.716027		0.000856331	0.279718	0.799808
LRP5	11		0.00249782	0.0473887	0.539017		0.00227637	0.0458904	0.716027		-0.00362624	0.00922091	0.232078
OR6B1	7		-0.00181484	0.0505942	0.555922		-0.00183168	0.045804	0.716027		-0.000474124	0.672133	0.94035
ADAL	15		0.00127281	0.071428	0.613824		0.00131728	0.045517	0.716027		-0.000497666	0.543228	0.904346
ORC2	2		-0.00201088	0.0842851	0.642529		-0.00220412	0.045742	0.716027		0.00137863	0.320825	0.821532
SLC3A2	11		-0.00353946	0.149701	0.752346		-0.00470941	0.0456324	0.716027		-0.00206467	0.463547	0.879119
ACTL10	20		-0.00104531	0.151946	0.75427		-0.0013329	0.0458471	0.716027		0.000959729	0.261193	0.787593
TOX	8		-0.00162626	0.165847	0.765583		-0.0020725	0.0449665	0.716027		0.000327317	0.79864	0.966837
NKX2.3	10		0.00110086	0.260287	0.852124		0.0017789	0.0459415	0.716027		-0.00042909	0.7053	0.947109
LRMDA	10		0.000812637	0.271642	0.856575		0.00141203	0.0459225	0.716027		0.00045489	0.60976	0.921808
RIPPLY3	21		0.00089331	0.36879	0.89129		-0.0017909	0.0456074	0.716027		-0.00146001	0.1981	0.744041
TSPAN32	11		-0.000568897	0.383623	0.892945		-0.00123884	0.0453996	0.716027		-0.000289138	0.704165	0.947109
CREG2	2		-0.000674434	0.445304	0.913071		0.00170625	0.0454851	0.716027		0.00288391	0.00642045	0.192685
AOC1	7		-0.000611297	0.487239	0.924087		-0.00167398	0.0457553	0.716027		-0.00099004	0.342992	0.831338
ARHGAP26	5		0.000687019	0.518925	0.930573		0.00189745	0.0449473	0.716027		0.00131324	0.276736	0.798131
SDCCAG8	1		0.000503131	0.557211	0.936572		-0.00160963	0.0450938	0.716027		-0.00203494	0.0429981	0.461129
PLPP6	9		-0.000556555	0.580237	0.940899		-0.00177195	0.0452369	0.716027		-0.00135056	0.228674	0.769668
DOCK8	9		0.000404244	0.641466	0.953323		-0.0015781	0.0457758	0.716027		-0.00272631	0.00572429	0.179053
FNIP1	5		0.000596054	0.641644	0.953323		-0.00225106	0.045629	0.716027		0.000342294	0.816187	0.970867
DCLRE1B	1		0.000955895	0.759844	0.977344		-0.00550744	0.0457359	0.716027		-0.00692843	0.0447778	0.465281
WBP2NL	22		0.000157458	0.87152	0.988952		-0.00180259	0.0457985	0.716027		-0.00133765	0.245215	0.777161
CHST10	2		0.000138893	0.900222	0.991638		0.00208003	0.0454729	0.716027		0.000950177	0.457033	0.876536
ZNF705B	8		-0.000142116	0.906247	0.992482		-0.00210044	0.0449833	0.716027		-0.000715554	0.595968	0.918525
MOV10	1		-9.72e-05	0.926254	0.994257		0.00201637	0.0457955	0.716027		0.00162618	0.186972	0.731251
PCYT1A	3		0.000265133	0.934602	0.994872		0.00665837	0.0448252	0.716027		0.00670222	0.0943016	0.614478
XPNPEP3	22		6.6e-05	0.946789	0.995463		-0.0019058	0.0456491	0.716027		-0.00126901	0.289396	0.807411
TRAP1	16		4.62e-05	0.960208	0.996474		-0.00171216	0.0459106	0.716027		-0.000875736	0.423278	0.863964
DNAJC30	7		0.00215747	0.0425867	0.517797		0.0019683	0.0459846	0.716081		-0.000629578	0.618477	0.923814
ARL4A	7		-0.00235227	0.0136502	0.289336		-0.00190345	0.0461223	0.71648		0.00171797	0.146569	0.689423
BTN1A1	6		0.00174347	0.0672487	0.60482		0.00182664	0.0461296	0.71648		5.38e-05	0.963273	0.996228
EYS	6		0.000109428	0.874435	0.988952		0.00133288	0.0460778	0.71648		0.00125209	0.131456	0.671325
NUDT11	X		0.0069959	3.94e-13	6.06e-10		0.00163304	0.0463582	0.718248		-0.0047719	2.05e-05	0.00288095
AGAP1	2		-0.00126464	0.232681	0.836294		-0.00207237	0.0464029	0.718248		-0.000286458	0.824944	0.971542
SULT1C4	2		-0.000406129	0.563736	0.937496		0.00132062	0.0463542	0.718248		0.00053276	0.507445	0.893796
CCNG1	5		0.00028967	0.738844	0.974462		-0.001547	0.0464023	0.718248		-0.000942554	0.346576	0.832357
BFAR	16		0.000144952	0.848988	0.987511		-0.00147989	0.0464439	0.718266		-0.00102181	0.280251	0.800329
MFAP5	12		-0.00112198	0.14542	0.74642		-0.00147122	0.0465129	0.718716		0.000412419	0.659988	0.935558
ERICH6B	13		-0.00142556	0.0560552	0.572532		-0.00137862	0.0466655	0.71984		0.000992353	0.252605	0.781318
ZNF200	16		-0.00160178	0.0685103	0.607456		-0.00163993	0.0466264	0.71984		0.00135391	0.18682	0.731168
TGDS	13		-0.0020628	0.026811	0.426349		-0.0018327	0.0468116	0.720243		-0.000347357	0.755999	0.95699
BATF	14		-0.00185025	0.0761326	0.626053		-0.00186017	0.0467967	0.720243		7.76e-06	0.994585	0.999037
C20orf202	20		0.000352348	0.667962	0.961118		-0.00165403	0.0467353	0.720243		-0.00262974	0.012172	0.267442
PDGFRA	4		0.0016105	0.281393	0.861843		0.00292007	0.0472394	0.721799		-0.000709268	0.691981	0.94459
SOX1	13		-0.00101039	0.441009	0.912158		-0.00220992	0.0472342	0.721799		-0.00120636	0.382001	0.844442
SYTL3	6		0.000528041	0.528661	0.931201		0.0016677	0.0471259	0.721799		-0.000126746	0.903498	0.983751
LYVE1	11		0.00041398	0.554561	0.936254		0.00130326	0.0470778	0.721799		0.000324678	0.690303	0.944291
ERI1	8		0.000529294	0.564027	0.937679		0.0017821	0.0472276	0.721799		-0.000555047	0.613259	0.922207
MGAT4B	5		-0.000401296	0.603692	0.948192		-0.00139048	0.0472733	0.721799		-0.000926749	0.290167	0.807949
UTF1	10		-0.00047586	0.625573	0.952633		-0.00182228	0.0471562	0.721799		-0.000636819	0.582092	0.914346
PLIN3	19		-0.000337984	0.744371	0.975292		-0.00186316	0.047247	0.721799		-0.000713141	0.548412	0.905748
PLA2G4E	15		-1.49e-05	0.986095	0.998646		0.00163973	0.0471059	0.721799		0.00138524	0.172984	0.718619
SPINT4	20		-0.000929647	0.213757	0.818532		-0.0014491	0.047389	0.722953		0.000881781	0.329361	0.825368
BMX	X		0.00452426	1.33e-11	9.23e-09		0.00110423	0.0480103	0.72355		-0.0044682	1.41e-09	1.49e-06
RIPPLY1	X		0.00311925	2.19e-05	0.00132792		0.00134575	0.0478429	0.72355		-0.00240535	0.00503525	0.166361
SMAD2	18		-0.00159315	0.0389416	0.499012		-0.00142077	0.0476244	0.72355		0.000639719	0.468302	0.879681
DUSP15	20		-0.00177943	0.0394823	0.502129		-0.00161907	0.0476709	0.72355		7.76e-05	0.939707	0.991713
SEL1L2	20		-0.00110894	0.0616163	0.588982		-0.00111309	0.04789	0.72355		0.00105243	0.130736	0.670309
SLC22A14	3		0.00146056	0.0656548	0.603696		0.0014877	0.0477516	0.72355		-0.00140868	0.126894	0.666935
OGFOD1	16		-0.00250057	0.0662119	0.604403		-0.00253155	0.0476264	0.72355		-0.000481615	0.75611	0.957014
E2F7	12		-0.00193695	0.13155	0.727668		-0.00225778	0.0474922	0.72355		-0.000219868	0.874969	0.981024
GTF3A	13		0.00298237	0.317836	0.87368		0.00581156	0.0477083	0.72355		9.66e-05	0.978883	0.996992
SELE	1		-0.000689309	0.358648	0.888009		0.00140324	0.0479506	0.72355		0.00066375	0.450196	0.875119
LAPTM4B	8		-0.000494902	0.564116	0.937679		-0.00156716	0.0479537	0.72355		0.00135872	0.184706	0.729956
ZNF565	19		-0.000425247	0.614929	0.950676		-0.00156001	0.0479679	0.72355		3.84e-05	0.969089	0.996589
EFEMP1	2		0.000376552	0.627561	0.952633		0.00147131	0.0480707	0.72355		6.79e-05	0.941058	0.99217
CTSC	11		0.000225532	0.755626	0.977064		0.00141936	0.0475201	0.72355		0.000956306	0.284789	0.803275
SRGN	10		0.000188493	0.822512	0.983488		0.00173429	0.0478075	0.72355		0.000704007	0.520964	0.897624
RPS7	2		-2.27e-05	0.993038	0.998706		-0.00499596	0.0480663	0.72355		-0.00385833	0.222279	0.765107
MORF4L2	X		0.00233226	0.00579303	0.161069		0.00159153	0.0481257	0.723773		-0.0017905	0.0731021	0.565513
ING1	13		-0.000135106	0.928343	0.994257		-0.0027843	0.0483205	0.726098		-0.00149717	0.405324	0.854499
ATP1B4	X		0.00513936	4.01e-08	5.68e-06		0.00156867	0.0486724	0.726121		-0.00500131	1.72e-06	0.000448875
PABPC4	1		-0.00243187	0.0117315	0.260946		-0.00175088	0.0487404	0.726121		0.00299172	0.00883774	0.226437
MAMLD1	X		0.00169261	0.0375733	0.493682		0.00143111	0.0488057	0.726121		-0.00108062	0.235648	0.77399
ULK2	17		0.00182405	0.0384184	0.497616		0.00172899	0.048742	0.726121		-0.00143114	0.194214	0.739936
RAD51	15		0.0042376	0.122305	0.715513		0.00531875	0.0487564	0.726121		0.0011877	0.723848	0.951456
PAPSS2	10		0.00111758	0.189567	0.796141		0.0015895	0.048782	0.726121		0.000296978	0.7697	0.960534
PROKR2	20		-0.000880907	0.247246	0.841306		-0.00137108	0.0486254	0.726121		-0.000574033	0.503734	0.892239
SPAST	2		-0.000584216	0.499333	0.924447		-0.00152564	0.0485384	0.726121		0.0020883	0.0361057	0.436588
ZNF583	19		-0.000482823	0.554359	0.936254		-0.00151362	0.0484055	0.726121		0.000140235	0.885009	0.981594
ACD	16		0.00081944	0.66222	0.959514		-0.00331769	0.0485009	0.726121		-0.00456936	0.0332863	0.418916
OR14C36	1		-0.000341348	0.716476	0.970801		-0.00164368	0.0487553	0.726121		-0.000895779	0.399421	0.852168
IZUMO4	19		0.000241199	0.808202	0.981686		-0.00173973	0.0486861	0.726121		-0.00213531	0.0527923	0.501416
KLF8	X		0.00569578	5.59e-13	6.71e-10		0.00134654	0.0497073	0.727267		-0.00452653	7.4e-07	0.000218694
GABRA3	X		0.00432693	1.12e-06	9.55e-05		0.00162042	0.0498057	0.727267		-0.00296043	0.00421413	0.148293
FMNL1	17		-0.00248446	0.00745648	0.192194		-0.00176622	0.0498108	0.727267		0.0018043	0.102489	0.629841
ZNF165	6		-0.00198723	0.0148733	0.306704		-0.00157331	0.0491475	0.727267		0.000617769	0.531915	0.90137
CCDC170	6		-0.00138305	0.0189656	0.351641		-0.00110963	0.0491239	0.727267		0.000648238	0.351549	0.833154
EZH1	17		0.00164857	0.0479829	0.54257		0.00154696	0.0496213	0.727267		-0.000881152	0.374597	0.840907
IRF3	19		0.00189204	0.0506084	0.555922		-0.0018094	0.0491195	0.727267		-0.0037613	0.0013912	0.0710062
ATP5MG	11		-0.00307845	0.079802	0.633393		-0.00328881	0.0491176	0.727267		-0.00216873	0.28653	0.80537
NUDT13	10		0.00184014	0.0816031	0.638681		0.00197521	0.0497802	0.727267		-0.000958442	0.446804	0.874596
EMCN	4		-0.00120086	0.0865609	0.646188		-0.0012664	0.0499597	0.727267		0.00227751	0.00616508	0.188584
PACSIN2	22		-0.0014064	0.112642	0.701092		-0.00159075	0.049604	0.727267		0.000555208	0.58192	0.914283
VPS50	7		-0.00115463	0.230704	0.835717		0.00188616	0.0498643	0.727267		0.000806979	0.481254	0.884761
TERF1	8		0.00373336	0.250909	0.845769		-0.00625723	0.0491322	0.727267		-0.00823641	0.0384325	0.445442
FAM102B	1		0.0014555	0.263095	0.85301		0.00240698	0.0496827	0.727267		0.000961098	0.53486	0.90149
MIB1	18		0.00261724	0.266151	0.854929		0.00490373	0.049479	0.727267		-0.000830113	0.77773	0.961374
MARCHF5	10		0.00321285	0.274236	0.85733		-0.00478918	0.0495996	0.727267		-0.00413738	0.220831	0.765073
CCDC166	8		-0.00104856	0.288806	0.86457		-0.00183693	0.0494241	0.727267		0.000281578	0.809863	0.968753
OR1D5	17		-0.00130625	0.293475	0.866612		-0.00221404	0.0496688	0.727267		0.000338336	0.813086	0.969829
CCR8	3		0.00068643	0.309337	0.870019		0.00126288	0.0496417	0.727267		-0.00157376	0.0475328	0.476306
PSKH2	8		0.000906571	0.316876	0.87336		0.00167616	0.0495594	0.727267		0.00119808	0.262378	0.788268
HTN1	4		-0.000802023	0.337395	0.881015		-0.00162118	0.0494752	0.727267		0.000834843	0.418671	0.861292
TAF4B	18		-0.0005665	0.472041	0.92013		-0.00142236	0.0499003	0.727267		0.0010787	0.239642	0.776457
ARRDC1	9		-0.000646213	0.54138	0.934138		-0.00196347	0.0496792	0.727267		0.000319502	0.800071	0.96689
HRH3	20		0.000530887	0.550324	0.935395		-0.00154991	0.0499726	0.727267		-0.00121709	0.221666	0.765073
BLOC1S6	15		-0.000268665	0.756115	0.977207		0.00161875	0.049309	0.727267		-5.81e-06	0.99535	0.999037
MEGF6	1		0.000226698	0.819767	0.98314		-0.00176719	0.0498602	0.727267		-0.00162976	0.159279	0.702776
EVI5L	19		-0.000165956	0.860552	0.988388		-0.00175767	0.0495793	0.727267		-0.000445692	0.700873	0.946172
CT55	X		0.00398147	4.66e-06	0.0003315		0.00145923	0.0506368	0.727531		-0.00325977	0.000784573	0.0482445
ALAS2	X		0.00325291	5.45e-05	0.0030293		0.001489	0.0505571	0.727531		-0.00307365	0.00160258	0.0794087
PTPN11	12		0.0070618	0.0195927	0.359839		0.00584063	0.0501373	0.727531		-0.0113737	0.000887601	0.052687
C17orf107	17		0.0017664	0.0508326	0.556749		-0.00154033	0.0503321	0.727531		-0.00244458	0.0155435	0.29978
JAKMIP2	5		0.000989558	0.199704	0.804938		0.00141679	0.0506155	0.727531		-0.00146892	0.100418	0.625292
NOG	12		-0.00105871	0.241228	0.839734		-0.00157327	0.0500909	0.727531		-0.00164274	0.0961112	0.617119
CLGN	4		-0.000781596	0.27641	0.858627		-0.00132629	0.05054	0.727531		-0.000533945	0.526675	0.898671
ZDHHC11	5		-0.00131426	0.343119	0.881015		-0.00255843	0.0503648	0.727531		0.00145379	0.393346	0.849415
MCOLN3	1		-0.000701374	0.348644	0.884347		0.00137043	0.0505155	0.727531		0.00188071	0.027464	0.387747
TGM7	15		-0.0007943	0.424225	0.907166		0.001801	0.0504042	0.727531		0.00162326	0.15996	0.703408
GBP7	1		0.00060261	0.450173	0.913271		0.00139862	0.0500773	0.727531		0.00137913	0.120568	0.655086
CTNND1	11		0.00102338	0.523069	0.930834		0.00302228	0.0503165	0.727531		0.000917667	0.634325	0.9281
AK1	9		-0.000427873	0.700784	0.969143		-0.00195051	0.0506216	0.727531		-0.00210242	0.0883745	0.601958
CACNG5	17		-0.000334299	0.718345	0.970801		-0.00169018	0.0504455	0.727531		-0.00067208	0.529298	0.899525
NIFK	2		0.000465273	0.848148	0.987511		0.00439718	0.050551	0.727531		-0.00207771	0.459007	0.876981
COPB1	11		0.000395658	0.893728	0.991125		0.00542521	0.050399	0.727531		0.004253	0.211438	0.757211
LRCH1	13		-0.00220064	0.00738113	0.190965		-0.00146146	0.0508016	0.727706		0.000992395	0.278914	0.799255
TSTD1	1		-0.00142198	0.175107	0.778264		-0.00186622	0.0509356	0.727706		-0.000133199	0.909487	0.985902
WDSUB1	2		0.00110581	0.24393	0.840518		0.00174876	0.0509722	0.727706		-0.00108788	0.320026	0.820789
DYNC2I1	7		-0.000799003	0.439328	0.911452		-0.00186534	0.0509039	0.727706		-0.000214313	0.857187	0.97774
PXYLP1	3		0.000689606	0.459385	0.916208		0.00168603	0.0507219	0.727706		0.00112205	0.299583	0.811913
DDN	12		0.00126686	0.516126	0.928889		0.00358368	0.0508631	0.727706		-0.0010896	0.625455	0.92537
FBXO42	1		0.000856925	0.722879	0.971463		0.00466037	0.0508109	0.727706		0.00562655	0.0613689	0.531323
EZH2	7		0.000163727	0.917955	0.993795		-0.00279853	0.0508477	0.727706		-0.00269605	0.134788	0.675892
SMIM24	19		-0.00194737	0.0572422	0.578751		-0.00187702	0.0513305	0.729405		0.00216714	0.0708504	0.559628
MIX23	3		-0.00243452	0.0709839	0.613824		-0.00255103	0.0512084	0.729405		0.00137271	0.397205	0.851232
PCMTD1	8		0.00162929	0.0754937	0.625094		0.00170664	0.051296	0.729405		-0.000553246	0.618056	0.92377
HENMT1	1		0.000884621	0.337709	0.881015		0.00167771	0.0513341	0.729405		-0.000795246	0.453833	0.875873
USP25	21		-0.000636888	0.406659	0.901035		-0.00150717	0.0511637	0.729405		-0.000535419	0.574651	0.913189
ZNF446	19		0.000304373	0.729444	0.972102		-0.00154039	0.0512562	0.729405		-0.00148027	0.13593	0.676597
CEACAM16	19		0.00120705	0.266219	0.854929		0.00209902	0.0514474	0.730107		5.59e-05	0.967364	0.996589
PYURF	4		-0.00150062	0.273084	0.857022		0.00283173	0.0514978	0.730107		0.00135538	0.433704	0.868528
INSL4	9		-0.000709722	0.416175	0.903262		-0.00154819	0.051505	0.730107		0.000852371	0.400794	0.852984
ETV3L	1		0.00109095	0.225145	0.831671		0.00171308	0.0516024	0.730448		-0.000416343	0.702713	0.946954
CSNK1G2	19		-0.000796111	0.338397	0.881015		-0.00146135	0.0516102	0.730448		-0.00186291	0.0434835	0.462217
FAM149A	4		-0.000958273	0.120467	0.714239		-0.0011901	0.0518775	0.731932		-0.000992984	0.193872	0.73927
LEMD3	12		0.00157841	0.206131	0.81071		0.00231832	0.0518685	0.731932		-0.000106839	0.942827	0.992575
HAO2	1		-0.00131903	0.242406	0.839941		0.00224835	0.05184	0.731932		0.00108109	0.417637	0.860877
PILRA	7		0.000643496	0.581617	0.941686		0.00221087	0.0518168	0.731932		-0.000820192	0.551095	0.907074
KCNJ15	21		-0.00208178	0.00479557	0.138464		-0.00128005	0.0522372	0.732027		0.00154037	0.0587675	0.521904
MME	3		-0.00181481	0.0210778	0.376761		-0.00145088	0.0521165	0.732027		0.00313419	0.000707719	0.0447402
MAPKAPK5	12		-0.00242769	0.0556303	0.57078		-0.00236056	0.0522817	0.732027		-0.00120929	0.409434	0.856868
MLLT3	9		-0.00131661	0.112942	0.701199		-0.0015331	0.051941	0.732027		0.000544213	0.578352	0.914026
PRKN	6		-0.000882434	0.18735	0.793982		-0.00126763	0.0519858	0.732027		-0.000299052	0.710536	0.94742
S100A9	1		-0.00129863	0.211297	0.81694		0.00206189	0.0523445	0.732027		0.0015647	0.217661	0.762793
TET2	4		-0.000675329	0.331883	0.878952		-0.00125437	0.052183	0.732027		0.000304017	0.705861	0.947109
ZNF202	11		0.000390988	0.674532	0.962848		-0.0016235	0.0522366	0.732027		0.000717336	0.513332	0.895716
CD5L	1		-0.000417535	0.69571	0.968222		0.00206617	0.052336	0.732027		0.00223084	0.0929883	0.611814
PIP4K2B	17		0.000188521	0.824005	0.983783		-0.00155638	0.0520558	0.732027		-0.00151534	0.127371	0.667292
OR2B11	1		-0.000161892	0.850174	0.987511		-0.00152054	0.0523718	0.732027		-0.00181489	0.063951	0.542153
OR11H4	14		-0.000119472	0.898391	0.991323		0.00177145	0.0522732	0.732027		0.00151698	0.178845	0.724754
CC2D1B	1		0.00121874	0.241988	0.839734		0.00199788	0.0525069	0.732778		-0.000505792	0.688831	0.943849
MAD2L2	1		0.00213313	0.508056	0.926052		0.00600332	0.0524941	0.732778		0.00555497	0.149923	0.691734
CLDN11	3		-0.000506651	0.564653	0.937679		0.00161295	0.0525723	0.733123		-9.26e-05	0.927434	0.989407
PRRG3	X		0.00293129	0.000875354	0.0352824		0.00157321	0.0531242	0.733218		-0.00184692	0.0758539	0.573986
PFDN2	1		0.00497719	0.0722002	0.615709		0.00482113	0.053006	0.733218		-0.000901815	0.771372	0.96097
GSTM4	1		-0.0014148	0.209858	0.815821		0.00220399	0.0530576	0.733218		0.00341379	0.0130433	0.278438
PLIN1	15		-0.000856751	0.282661	0.862717		-0.00144935	0.0530861	0.733218		-0.000705664	0.443946	0.873589
ABCB1	7		0.000638984	0.439112	0.911452		0.00156332	0.0530238	0.733218		0.00106836	0.29419	0.810128
LIPF	10		0.00050403	0.442878	0.912719		0.00119447	0.0530904	0.733218		3.54e-05	0.963179	0.996228
PLCB4	20		-0.000561765	0.470809	0.919719		-0.00160953	0.053091	0.733218		-0.00020003	0.849373	0.975694
NR2F1	5		-0.000621062	0.510688	0.926929		-0.001709	0.0528981	0.733218		0.000563701	0.611196	0.921808
DIRAS3	1		-0.000392302	0.694763	0.967682		0.00195436	0.0527559	0.733218		0.0018442	0.12728	0.667292
SNPH	20		0.000236461	0.741052	0.974473		0.0012926	0.0526201	0.733218		0.000884896	0.292324	0.808557
ZFP14	19		0.000187864	0.813413	0.982642		-0.00145812	0.0529135	0.733218		-0.000482398	0.613224	0.922207
DYNLL2	17		9.89e-05	0.902935	0.992014		-0.00140993	0.0527468	0.733218		-0.000163767	0.859042	0.977966
SAP18	13		-0.000144751	0.950883	0.996115		-0.00443387	0.0531489	0.733218		-0.000294906	0.9199	0.98755
UCN	2		-1.28e-05	0.990934	0.998706		-0.00196947	0.0527583	0.733218		-8.29e-05	0.948857	0.993704
CRY1	12		-0.000325126	0.710323	0.970273		-0.00158993	0.0532983	0.734155		-0.00146906	0.147418	0.689423
PLA2G7	6		0.000275443	0.71916	0.970801		0.00136425	0.0532762	0.734155		-0.000835424	0.340601	0.830581
ME2	18		-0.00166644	0.109305	0.69422		-0.0018985	0.0536148	0.736816		0.00116695	0.338874	0.829981
C6orf58	6		-0.00102615	0.1874	0.793982		-0.00136459	0.0535556	0.736816		0.000585499	0.512607	0.895447
PHRF1	11		-0.000403449	0.612072	0.950501		-0.00147106	0.0536476	0.736816		-0.000749867	0.440629	0.872494
NBAS	2		-0.000722925	0.785917	0.979735		-0.00479063	0.053655	0.736816		-0.00289354	0.346109	0.832357
PROK1	1		-0.00146112	0.0845553	0.642529		0.00159326	0.0538279	0.737101		0.00234744	0.0203042	0.341094
ZNF492	19		0.00258518	0.321692	0.87454		-0.00482038	0.0538187	0.737101		0.00161954	0.60519	0.920821
IL17RE	3		-0.000910595	0.362402	0.889421		-0.0018421	0.0538395	0.737101		0.00091237	0.453256	0.875379
TEKT4	2		0.000356857	0.714686	0.970801		0.00178593	0.0538198	0.737101		0.001837	0.107217	0.637494
SEC31B	10		0.000285408	0.687299	0.965646		0.00130634	0.053993	0.73851		0.00183513	0.0309362	0.405365
HNF4A	20		-0.000323263	0.723909	0.971889		-0.00172817	0.0540243	0.73851		0.000201707	0.855787	0.977415
COL4A5	X		0.0036548	1.75e-06	0.000139284		0.00133589	0.05511	0.73867		-0.00301552	0.000513132	0.0355581
TAF7L	X		0.00299473	0.00971788	0.231291		0.00195057	0.0543901	0.73867		-0.00259895	0.0472672	0.475231
YPEL1	22		0.00335036	0.0331311	0.471503		0.00297776	0.0549403	0.73867		-0.00212769	0.282092	0.801843
AMOTL2	3		-0.00269496	0.0527863	0.562756		-0.00263006	0.0545706	0.73867		0.00171511	0.309077	0.818733
TLE4	9		-0.00188981	0.0557151	0.571027		-0.00160587	0.0545035	0.73867		0.00192182	0.0700254	0.556773
IFNA2	9		0.00161285	0.0717753	0.613824		0.00159284	0.0550861	0.73867		-0.00142748	0.174331	0.719809
XRCC6	22		0.0036684	0.137613	0.735793		0.00441197	0.055096	0.73867		-0.00408278	0.152345	0.692261
EIF3K	19		-0.00166852	0.156607	0.757266		-0.00214388	0.0542907	0.73867		0.00159107	0.260984	0.787233
ZNF236	18		-0.00258586	0.209171	0.815637		-0.0039185	0.0548476	0.73867		0.00403189	0.115086	0.647552
ETFA	15		0.000978695	0.251755	0.846872		-0.0014696	0.054936	0.73867		-0.00148968	0.124114	0.660884
PCDHGB3	5		0.000944538	0.267284	0.854929		0.00162908	0.0545124	0.73867		-0.000871224	0.413012	0.859214
TMEM259	19		-0.00107994	0.276293	0.858627		-0.00178015	0.0547058	0.73867		-0.000700509	0.548777	0.905818
HERC2	15		-0.00228635	0.308741	0.869698		-0.00400602	0.0550556	0.73867		-0.00224157	0.384628	0.845619
AQP12B	2		0.00103752	0.309365	0.870019		-0.00180617	0.0548618	0.73867		-0.00105657	0.385432	0.846134
HBQ1	16		0.000763652	0.390388	0.894899		-0.00159025	0.0541089	0.73867		-0.00160548	0.120888	0.656225
ZNF543	19		0.000664114	0.394776	0.895301		-0.00138415	0.055143	0.73867		-0.00147517	0.111832	0.644338
PFDN5	12		0.00156595	0.426908	0.907618		-0.00356891	0.0544533	0.73867		-0.00411956	0.0727765	0.565005
PHF14	7		0.000525333	0.585482	0.943094		0.00176803	0.0549597	0.73867		-0.000164265	0.884401	0.981594
THEG	19		0.000453527	0.593934	0.944596		-0.00149362	0.055037	0.73867		-0.00190092	0.0516177	0.496528
SLC5A2	16		0.000424836	0.59853	0.946047		-0.00141478	0.0548123	0.73867		-1.8e-05	0.985006	0.997236
KIF3C	2		-0.000485648	0.599523	0.94634		-0.00161952	0.0550467	0.73867		-0.000708161	0.501086	0.891727
TUBGCP3	13		-0.00117098	0.640251	0.953323		-0.00461319	0.054783	0.73867		-0.00137452	0.64033	0.929552
SIRT5	6		-0.000317097	0.751713	0.977053		-0.00181426	0.0543198	0.73867		-0.00164397	0.167413	0.712203
ACTA2	10		0.000120419	0.871241	0.988952		0.00134081	0.054582	0.73867		0.000934543	0.28381	0.802356
STOM	9		-0.00011699	0.879815	0.989362		-0.00134829	0.0545528	0.73867		-0.00145903	0.0927053	0.611717
RAB29	1		-3.02e-05	0.975087	0.997289		-0.001749	0.0550554	0.73867		-0.00147377	0.195668	0.742245
UBE2L6	11		2.58e-05	0.975357	0.997289		0.00154225	0.054944	0.73867		0.000289088	0.766677	0.959892
C21orf140	21		-7.4e-05	0.926627	0.994257		-0.00143493	0.0551891	0.738739		0.000470169	0.625387	0.92537
BHLHB9	X		0.00271052	0.000427035	0.0184064		0.00131875	0.0558596	0.740046		-0.0026993	0.00233103	0.100715
C5orf38	5		-0.00249129	0.00578078	0.160977		-0.00163504	0.0558588	0.740046		0.00161505	0.128783	0.667292
CPQ	8		-0.00245479	0.0114354	0.256577		-0.00178297	0.0557103	0.740046		0.00163137	0.156324	0.699117
HPRT1	X		0.00188372	0.0500868	0.553968		-0.00162091	0.05564	0.740046		-0.00221504	0.0411687	0.456016
UGT2A3	4		-0.00137433	0.114146	0.704853		-0.00158625	0.0559029	0.740046		-0.000790088	0.442399	0.872892
ZMAT3	3		0.00112099	0.265915	0.854924		0.00182549	0.0557103	0.740046		-5.46e-05	0.962679	0.996146
ETAA1	2		-0.00125022	0.270463	0.856575		-0.00207758	0.0555049	0.740046		0.000790191	0.555337	0.908282
DHRSX	X		0.00304009	0.277934	0.859702		0.00570471	0.0554865	0.740046		0.00202104	0.587682	0.916495
FOSB	19		0.000936762	0.321023	0.874372		0.00174279	0.0555799	0.740046		-0.000386185	0.731649	0.952904
TRIM56	7		0.000697593	0.452835	0.914621		0.00170567	0.0556666	0.740046		0.00209026	0.0648781	0.544464
GSTCD	4		-0.000590363	0.513928	0.927301		-0.00161272	0.0557839	0.740046		0.00132994	0.209812	0.756338
PALMD	1		0.000317234	0.717895	0.970801		0.00165215	0.0558917	0.740046		0.000758063	0.472077	0.880661
UBE2F	2		-0.000621693	0.715413	0.970801		-0.00303454	0.0555128	0.740046		-0.00136424	0.493081	0.888492
SHC3	9		-0.000217493	0.748922	0.976191		0.00122883	0.0555576	0.740046		0.000236836	0.764391	0.959189
OR10AG1	11		0.000178006	0.825484	0.983783		0.00141608	0.0554539	0.740046		0.0011755	0.201978	0.74836
ZNF711	X		0.00370567	1.53e-06	0.000124954		0.001286	0.0559932	0.740154		-0.00401249	3.62e-06	0.000776121
ARID3B	15		-0.000693226	0.603501	0.94814		-0.00230599	0.0559771	0.740154		-0.00134841	0.374669	0.840907
WDR44	X		0.00674433	0.000108756	0.00548867		0.00290874	0.0562597	0.740671		-0.0044306	0.0310756	0.406196
BAMBI	10		0.00241589	0.0771241	0.62727		0.00263132	0.0564346	0.740671		-0.00301013	0.0767812	0.575468
LRP3	19		-0.0010068	0.218619	0.823027		-0.00149352	0.0565434	0.740671		0.00116165	0.246085	0.777161
CSNK2A2	16		0.00114467	0.315153	0.872947		0.00197483	0.0565622	0.740671		-0.00187869	0.145467	0.689346
C1orf162	1		-0.00110108	0.333036	0.878952		0.00209314	0.0565834	0.740671		0.00238048	0.0728483	0.565005
S100A1	1		0.000996488	0.362349	0.889421		0.00196311	0.0565121	0.740671		0.000536011	0.677005	0.942031
CA4	17		-0.000812352	0.38874	0.894899		-0.00173259	0.0562749	0.740671		-0.000935048	0.405025	0.854401
DYDC2	10		-0.000466253	0.502661	0.925057		0.00131386	0.0566079	0.740671		0.00257728	0.00281492	0.11397
LRG1	19		-0.000381341	0.621872	0.952501		-0.00134258	0.0562344	0.740671		-0.000138765	0.877678	0.981044
PHLDB1	11		-0.000490925	0.630276	0.952633		-0.00179211	0.0566079	0.740671		-0.00188718	0.100684	0.625292
ABCC11	16		0.000203672	0.81063	0.982161		0.00158036	0.0565221	0.740671		-0.000794536	0.444553	0.87369
PLPPR3	19		-0.000157144	0.868603	0.988952		-0.00158825	0.0561862	0.740671		-0.000492137	0.641557	0.929552
KCNT2	1		8.21e-05	0.914743	0.993286		0.00135268	0.0562871	0.740671		0.0010058	0.259062	0.785808
RPRM	2		4.97e-05	0.956476	0.996356		0.00159146	0.0563575	0.740671		0.000564951	0.591758	0.917711
POU3F1	1		-0.00136233	0.183357	0.788048		-0.00189223	0.0568092	0.741494		0.000773474	0.537035	0.901619
MRTO4	1		-0.00326453	0.335362	0.879371		0.00643853	0.0568354	0.741494		0.00220782	0.585068	0.915395
SMYD3	1		0.000339414	0.688561	0.965726		-0.00140844	0.0567311	0.741494		-0.00109998	0.237768	0.775362
ZNF613	19		0.000129078	0.895363	0.991125		-0.00172281	0.0567734	0.741494		-0.000517769	0.654282	0.934246
SOX2	3		-0.0014917	0.27277	0.856575		0.00299986	0.0569321	0.741681		0.00171334	0.352626	0.833154
ASB3	2		-8.14e-05	0.952481	0.996356		-0.00220819	0.056908	0.741681		-0.00171596	0.241233	0.776942
CEP112	17		-0.00116135	0.142713	0.743978		-0.00154578	0.0570591	0.742799		0.000526377	0.604643	0.920821
CCNB3	X		0.00259937	0.000438899	0.0188277		0.00128523	0.0571655	0.743647		-0.00176284	0.037874	0.444835
PPP2R1B	11		0.000334491	0.708501	0.969906		0.00164515	0.0572511	0.743756		-0.000521486	0.624304	0.925073
ZNF322	6		-0.000131285	0.894402	0.991125		-0.00182702	0.0572565	0.743756		-0.00147048	0.220184	0.764858
CCND2	12		-0.00288502	0.202052	0.807283		-0.00355721	0.0573259	0.744122		0.000342	0.886595	0.981594
CSAD	12		-0.000959816	0.300093	0.866887		0.00172971	0.0573856	0.74436		0.000555642	0.61425	0.922749
SLC48A1	12		-0.00149408	0.12423	0.716838		-0.00167554	0.0574798	0.744528		-0.00122574	0.258583	0.785808
CEMP1	16		0.00096967	0.288503	0.86457		-0.00161464	0.0574812	0.744528		-0.00127957	0.238271	0.776299
GMPPB	3		0.000307998	0.918599	0.993795		0.00546989	0.0575275	0.744593		0.000137601	0.968381	0.996589
RTEL1	20		0.00163102	0.471605	0.919777		-0.0039882	0.0576285	0.745365		-0.00722881	0.00515395	0.167012
SHROOM2	X		0.00392751	6.86e-06	0.000471702		0.00156803	0.0577123	0.745913		-0.00269431	0.0109375	0.255235
CPA2	7		-0.00116746	0.172641	0.775133		-0.00152906	0.0577776	0.746222		0.000553353	0.58269	0.914649
TRUB1	10		0.000820977	0.256434	0.849378		0.00133111	0.0578403	0.746496		-0.00031703	0.715256	0.948862
CDC34	19		-0.0023886	0.0114742	0.257127		-0.00163518	0.057936	0.746988		0.00117581	0.265294	0.789148
OR2G2	1		-0.00107933	0.185723	0.79121		-0.00144319	0.0579613	0.746988		-0.000681251	0.467559	0.879681
PIDD1	11		-0.00151358	0.194862	0.801168		-0.00206752	0.0580641	0.747777		-0.00115049	0.39197	0.848444
ITM2A	X		0.00461356	1.81e-07	2.11e-05		0.00143783	0.0582613	0.748289		-0.00296358	0.00212208	0.09456
YIPF5	5		0.000867515	0.497115	0.924447		0.00236858	0.0582117	0.748289		-0.000177406	0.908501	0.985712
ATP6V1B1	2		-0.000492298	0.569241	0.939434		0.00167603	0.0582699	0.748289		0.000687499	0.52032	0.897624
ARRDC4	15		-0.000171415	0.856234	0.987785		-0.0016973	0.0582334	0.748289		-0.000763438	0.49842	0.891245
SLC25A14	X		0.00393863	6.79e-09	1.37e-06		0.00122311	0.0597002	0.748413		-0.00358967	1.27e-05	0.00195381
TBX22	X		0.00336476	2.8e-05	0.00164624		0.00136125	0.0599966	0.748413		-0.00286677	0.00196929	0.0900063
MARVELD2	5		-0.00249913	0.00407102	0.12184		-0.00158931	0.0593143	0.748413		0.000684383	0.510834	0.89504
TMEM165	4		0.00333786	0.0305559	0.459537		0.00304658	0.0591989	0.748413		-0.00409687	0.027984	0.389892
ADCK1	14		-0.00134159	0.0543885	0.568068		-0.00128764	0.0595161	0.748413		0.00102525	0.227208	0.76934
SHISA3	4		0.00155261	0.0643524	0.599325		0.00145566	0.0598268	0.748413		-0.000540419	0.583678	0.914903
BUD13	11		0.00510902	0.0841985	0.642529		-0.00517103	0.059778	0.748413		-0.00769404	0.0284124	0.39262
SERPINB1	6		-0.00123605	0.10037	0.677293		-0.00127733	0.0600658	0.748413		0.00152727	0.0717392	0.561669
CHDH	3		-0.00136856	0.108117	0.691718		0.00156201	0.0596792	0.748413		0.0013156	0.194999	0.741827
EPOR	19		-0.0013388	0.121729	0.714627		-0.00157137	0.0596505	0.748413		0.000799812	0.441437	0.872865
KLK6	19		-0.00122299	0.138526	0.736895		-0.00153034	0.0593215	0.748413		0.000527923	0.609125	0.921808
MPDZ	9		-0.00123495	0.141779	0.741761		-0.0013988	0.0599458	0.748413		0.000129617	0.889566	0.981594
TP63	3		0.00220526	0.192695	0.798286		0.00341169	0.0596294	0.748413		-0.00189125	0.364852	0.837089
ZYG11A	1		-0.000983514	0.238887	0.839103		0.00152403	0.0585325	0.748413		7.11e-05	0.941874	0.99217
MCRS1	12		-0.00179307	0.250695	0.845393		-0.00276849	0.0584004	0.748413		-0.000345171	0.847625	0.975619
FAM71F2	7		0.00119495	0.266622	0.854929		-0.00177989	0.0585891	0.748413		-0.00181835	0.133201	0.674126
ZNF783	7		-0.000816551	0.288569	0.86457		-0.0013639	0.0593155	0.748413		-0.000778653	0.381704	0.844442
FAM53B	10		0.00105311	0.337279	0.881015		0.00192414	0.0592728	0.748413		0.000799302	0.537871	0.901808
HOXC6	12		-0.000887327	0.382775	0.892945		0.00195967	0.0590972	0.748413		0.000418915	0.735588	0.953065
NR1H3	11		-0.000615698	0.403633	0.898818		0.00131222	0.0584288	0.748413		0.00111611	0.196388	0.742348
PARP15	3		-0.000610501	0.409811	0.901543		-0.00136115	0.0590514	0.748413		2.93e-05	0.973741	0.9966
DEFB116	20		-0.000680729	0.425722	0.907166		-0.00157475	0.0598655	0.748413		0.00039908	0.699655	0.945931
TRIM43	2		0.000661192	0.49861	0.924447		0.0018433	0.0583679	0.748413		0.000649237	0.584753	0.915175
SMIM8	6		0.000509283	0.537519	0.933969		-0.00141714	0.0599913	0.748413		-0.00114933	0.233258	0.773106
TEKT2	1		0.00074867	0.544618	0.93449		0.0022858	0.0586251	0.748413		-0.00105438	0.47333	0.880961
CNTN6	3		-0.000426065	0.597842	0.945686		-0.00142947	0.059017	0.748413		0.000148285	0.878034	0.981044
BPNT2	8		0.000390278	0.648394	0.954852		0.00153285	0.0591796	0.748413		-6.18e-06	0.995087	0.999037
CHRFAM7A	15		0.000368911	0.667886	0.961118		0.00151103	0.0594002	0.748413		0.000852088	0.403441	0.854401
ZNF75A	16		-0.000442958	0.669341	0.961371		-0.00181627	0.0599558	0.748413		-0.00305304	0.00984505	0.242153
SIGLEC1	20		-0.0002986	0.707659	0.96979		-0.00149086	0.0593405	0.748413		-0.00063283	0.525807	0.89864
CST2	20		-0.000338981	0.718605	0.970801		-0.00170253	0.0592246	0.748413		-0.00135696	0.235736	0.77399
CHMP6	17		0.000929603	0.727754	0.971889		0.00461397	0.0598326	0.748413		0.00119184	0.69314	0.944617
CORIN	4		-0.000323952	0.741803	0.974473		-0.00184333	0.0599633	0.748413		-0.000408857	0.74101	0.954152
ZSCAN9	6		0.000270004	0.75952	0.977344		-0.00143895	0.0600421	0.748413		0.000471481	0.634687	0.9281
DUOXA1	15		0.000334519	0.774008	0.978473		0.0021344	0.0590201	0.748413		0.000542152	0.693505	0.944632
GNAT1	3		-0.000292988	0.789295	0.980022		0.00204542	0.0585324	0.748413		-0.000904384	0.479255	0.883798
MINDY1	1		0.000299229	0.813321	0.982642		0.00227183	0.0597808	0.748413		0.000535491	0.713837	0.948857
TMC1	9		0.000186533	0.855808	0.987785		0.00178312	0.059668	0.748413		0.00211332	0.0746048	0.569798
OR2V2	5		-0.000127182	0.873193	0.988952		-0.00148433	0.0595475	0.748413		-0.00155131	0.116649	0.649296
ERVW.1	7		0.000295401	0.887539	0.990669		-0.00363234	0.059056	0.748413		-0.00160503	0.508378	0.894716
BCL9L	11		-0.000206839	0.905784	0.992432		-0.00300711	0.0596586	0.748413		-0.00281887	0.159093	0.702546
KRTAP21.1	21		0.000159229	0.933318	0.994872		-0.0033078	0.0600335	0.748413		-0.00300011	0.169802	0.715298
PRB2	12		5.89e-05	0.96853	0.997247		-0.00246931	0.0591079	0.748413		-0.00153147	0.358076	0.833807
CAPN3	15		0.00117614	0.147072	0.74642		0.00147527	0.0602166	0.749773		-5.48e-05	0.955818	0.994584
ABCC12	16		-0.000963636	0.156892	0.757266		-0.00119484	0.0602657	0.749867		0.000465892	0.555583	0.908282
IRAK1	X		0.00563845	3.43e-08	5.02e-06		0.00162988	0.0605371	0.750035		-0.00457572	5.21e-05	0.00582635
TBL2	7		0.00160573	0.130493	0.727668		0.00183444	0.0610125	0.750035		-0.000916103	0.465224	0.879132
OR14A16	1		-0.00104956	0.199287	0.804809		-0.00143372	0.0609363	0.750035		-0.000715858	0.445283	0.874098
BTN2A2	6		-0.000975518	0.228497	0.835601		-0.00148416	0.0607272	0.750035		0.000568357	0.565826	0.911247
ADM5	19		-0.00110027	0.240015	0.839734		-0.00168226	0.0606708	0.750035		-0.00185085	0.0929108	0.611814
CLN5	13		-0.000903719	0.261468	0.852124		-0.0014506	0.0607698	0.750035		-0.00166535	0.0775667	0.57701
PI4KA	22		0.00280198	0.277093	0.859343		0.00433878	0.0610285	0.750035		-0.00497048	0.0891211	0.603418
SERPING1	11		0.000972661	0.303185	0.867447		0.00171386	0.0607252	0.750035		-0.00115021	0.316149	0.819397
OR2AE1	7		-0.000904757	0.368794	0.89129		-0.00182265	0.0609394	0.750035		-0.000256509	0.831176	0.9719
OR4D11	11		-0.000588375	0.47592	0.922021		0.00148355	0.0607886	0.750035		0.000768047	0.423556	0.864014
FAM111A	11		0.000450967	0.492415	0.92433		0.00122343	0.0603986	0.750035		0.000278987	0.72512	0.951496
LIMA1	12		0.000692996	0.507733	0.926052		0.00191287	0.0605767	0.750035		-0.000400565	0.74975	0.955433
TMEM64	8		-0.00104705	0.527296	0.931201		-0.00300486	0.0605385	0.750035		0.00127066	0.53185	0.90137
MGMT	10		-0.00042935	0.537179	0.933969		-0.00120244	0.0609164	0.750035		0.000407728	0.618867	0.923865
CPLANE1	5		0.000387884	0.73088	0.97233		-0.00192626	0.0605042	0.750035		-0.00129817	0.322855	0.822712
TAF3	10		-0.000291658	0.855238	0.987686		-0.00279973	0.0604762	0.750035		-0.000389457	0.838276	0.973587
DEFB4A	8		0.000100635	0.930439	0.994377		-0.00194296	0.0603763	0.750035		-0.000865989	0.509633	0.89504
ZPR1	11		0.000134293	0.960935	0.996474		0.00478447	0.0609697	0.750035		0.0059218	0.0603714	0.527503
TCP11X2	X		0.00677263	1.16e-09	3.07e-07		0.00169016	0.0637903	0.75166		-0.00519909	2.39e-05	0.00313878
HTR2C	X		0.0044682	2.19e-09	5.25e-07		0.0011728	0.0646826	0.75166		-0.00425119	4.04e-07	0.000134783
ARHGEF9	X		0.00397823	3.45e-07	3.51e-05		0.0012931	0.0629984	0.75166		-0.00239794	0.00651911	0.19414
SHROOM4	X		0.00397356	5.64e-07	5.29e-05		0.00128561	0.0648389	0.75166		-0.00348268	0.000134723	0.0124477
FMR1NB	X		0.00388126	3.44e-06	0.000257155		0.00141749	0.0642725	0.75166		-0.00207733	0.0365961	0.439598
RAB9A	X		0.00360096	6.42e-06	0.000445002		0.00128314	0.0645465	0.75166		-0.00224315	0.012545	0.272645
L1CAM	X		0.00457512	1.48e-05	0.00094033		0.00166241	0.0632096	0.75166		-0.00451554	8.19e-05	0.00828635
TMEM255A	X		0.00324752	6.84e-05	0.00365575		0.00140185	0.0617907	0.75166		-0.00122064	0.20027	0.747005
H3C6	6		-0.00302072	0.00401667	0.12122		-0.00189744	0.0645021	0.75166		0.00140734	0.260617	0.786523
DNAAF5	7		-0.00498366	0.00405461	0.121722		-0.00314862	0.0643911	0.75166		0.0013207	0.509931	0.89504
SYTL4	X		0.00243044	0.00468658	0.135753		0.00146955	0.0630803	0.75166		-0.00168998	0.0866939	0.598979
MAP3K4	6		-0.00291239	0.00957618	0.228522		-0.001948	0.0648738	0.75166		0.00278576	0.0337414	0.420996
F9	X		0.00210023	0.0130219	0.279638		0.00137959	0.0646823	0.75166		-0.00141566	0.127432	0.667292
NLRP3	1		-0.00195195	0.0220906	0.383383		-0.00147363	0.0627201	0.75166		-0.000693203	0.469706	0.880063
SLC27A5	19		0.00228536	0.0290105	0.444967		-0.00165526	0.0631051	0.75166		-0.00391289	0.000648975	0.0417592
NEUROD1	2		-0.0025656	0.0320852	0.467874		-0.00208287	0.0647995	0.75166		0.00395496	0.00533229	0.170039
SPATC1L	21		-0.00186075	0.0361385	0.484455		-0.00157315	0.0627951	0.75166		-0.000420376	0.686704	0.94348
EDN3	20		-0.00168447	0.0481121	0.543213		-0.00152561	0.0617224	0.75166		0.00200588	0.049799	0.486602
BIN2	12		-0.00158626	0.0499148	0.553257		0.0014543	0.0647844	0.75166		0.000655674	0.484356	0.886353
EHBP1	2		-0.00165023	0.0628627	0.59311		-0.00146297	0.0633387	0.75166		0.000575474	0.550826	0.906903
PPP1R14D	15		-0.00163355	0.0675823	0.605765		0.00164112	0.0631532	0.75166		0.00147246	0.1624	0.707635
TIPIN	15		0.00418971	0.0733371	0.618883		0.00412327	0.0643822	0.75166		-0.00176324	0.525908	0.898671
ACSS3	12		-0.00121777	0.0892354	0.653028		-0.00124508	0.0619818	0.75166		0.000884686	0.286922	0.805465
AP1M2	19		-0.00129973	0.131651	0.727668		-0.00146668	0.0642855	0.75166		0.00136108	0.173605	0.718619
MT1X	16		0.00179973	0.156069	0.75656		-0.00208738	0.0645523	0.75166		-0.00406008	0.00575548	0.179717
SYT3	19		0.0010666	0.166075	0.765848		-0.00134637	0.0623556	0.75166		-0.00156239	0.0877684	0.601444
ZDHHC6	10		0.00113395	0.16841	0.768749		0.00142122	0.0640561	0.75166		-0.000713108	0.4522	0.875119
ANXA9	1		-0.00141226	0.169245	0.771193		0.00197874	0.0623017	0.75166		0.00139145	0.264237	0.788933
MT1HL1	1		0.00125828	0.196508	0.801567		-0.0015965	0.0633467	0.75166		-0.00029564	0.796732	0.966473
TERF2	16		-0.00328383	0.201342	0.807025		-0.00469245	0.0636863	0.75166		0.000468582	0.881257	0.981553
STK33	11		-0.000798863	0.201765	0.807283		-0.00114611	0.0630238	0.75166		0.000215206	0.778345	0.961374
USP19	3		0.00167096	0.203522	0.809283		0.00240391	0.0621887	0.75166		-0.00239901	0.120204	0.654295
KERA	12		-0.000861383	0.205507	0.810359		-0.00115807	0.0624967	0.75166		0.000707074	0.35699	0.833362
CTSZ	20		-0.00100964	0.220866	0.825113		-0.00140882	0.0614815	0.75166		0.00046774	0.62239	0.924686
EML5	14		-0.00111298	0.230606	0.835717		-0.00152073	0.0638504	0.75166		6.84e-05	0.947531	0.993579
CLPTM1	19		0.00130264	0.234718	0.837774		0.00190648	0.0614897	0.75166		-0.00105493	0.405171	0.854497
BSG	19		0.00135334	0.246094	0.840869		-0.0019688	0.06231	0.75166		-0.00184638	0.177964	0.7244
ESYT2	7		-0.000930613	0.247131	0.841306		-0.00137631	0.062812	0.75166		-0.000187716	0.837794	0.973587
IMPDH2	3		-0.00248208	0.262394	0.852124		0.0045736	0.0643113	0.75166		0.00222947	0.431198	0.867901
KCNK17	6		0.00109782	0.273821	0.85733		0.00181287	0.0644047	0.75166		-0.000681969	0.582843	0.914649
PLPPR4	1		-0.000900817	0.280167	0.860982		0.00150388	0.0622847	0.75166		0.00312556	0.00201587	0.0912563
TTF1	9		-0.0011675	0.288874	0.86457		-0.00190746	0.0638618	0.75166		-0.000313412	0.801654	0.967537
ZFP62	5		0.000763399	0.307491	0.868079		-0.00126521	0.0645636	0.75166		-0.00216389	0.0123167	0.269451
KIAA1671	22		-0.00107137	0.314039	0.872947		-0.00188278	0.0624479	0.75166		0.00144049	0.255674	0.783388
CTBS	1		0.000903804	0.319022	0.873786		0.00159946	0.0631285	0.75166		8.5e-05	0.936491	0.991236
VWC2	7		-0.00092794	0.340184	0.881015		0.00169859	0.0644404	0.75166		0.00189604	0.0955553	0.616847
PTP4A1	6		-0.00121041	0.366115	0.891117		-0.00227904	0.0647958	0.75166		-7.41e-05	0.960987	0.99576
FAM186A	12		-0.000776507	0.370494	0.891506		0.00152869	0.0615878	0.75166		0.000999178	0.314161	0.818733
LZTS3	20		-0.000947022	0.382381	0.892945		-0.00184961	0.0632794	0.75166		-0.00214979	0.0793333	0.582321
LLCFC1	7		0.000643373	0.398346	0.897363		-0.0012759	0.0635891	0.75166		-0.00230632	0.00714104	0.203532
CDC5L	6		0.00191322	0.42648	0.907295		0.00396652	0.0631882	0.75166		0.00133515	0.617294	0.923588
GTPBP3	19		-0.000776483	0.472847	0.920486		0.00189377	0.064658	0.75166		0.00240692	0.0569	0.516559
DIPK1A	1		0.000825578	0.483211	0.923445		0.00214616	0.0619679	0.75166		0.000924526	0.517363	0.897624
CHRNA5	15		-0.000522101	0.523571	0.930834		-0.00141435	0.0646246	0.75166		-0.000197807	0.838338	0.973587
ZNF121	19		0.000586431	0.528931	0.931238		-0.00154114	0.0640267	0.75166		-0.000639734	0.55547	0.908282
ENPP2	8		0.000523871	0.539108	0.933969		0.00164832	0.0625795	0.75166		0.000628356	0.567251	0.911321
RNMT	18		-0.00137735	0.591634	0.943984		-0.00457426	0.0620573	0.75166		0.000973447	0.749203	0.955363
ENAH	1		0.000529025	0.616236	0.950676		-0.001981	0.0629591	0.75166		-0.00384714	0.00309658	0.122181
KRT81	12		0.000499209	0.619742	0.951283		0.00182383	0.063865	0.75166		0.000480068	0.695128	0.945388
CYP2C8	10		0.000369737	0.656764	0.957434		0.00146448	0.0643187	0.75166		0.000503029	0.608621	0.921342
WDR47	1		-0.000418859	0.656765	0.957434		0.00172732	0.0647131	0.75166		0.000290285	0.796641	0.966473
ZCCHC10	5		-0.000360522	0.666217	0.961104		-0.00143649	0.0616142	0.75166		-0.000305955	0.750729	0.955815
SENP8	15		-0.000461098	0.683855	0.964615		-0.00194329	0.0621828	0.75166		-0.00182687	0.15451	0.696124
CNTNAP2	7		-0.00033565	0.692308	0.967072		-0.00144184	0.0643672	0.75166		-0.000597845	0.534019	0.90149
CDH1	16		0.000489379	0.70485	0.969394		0.00262209	0.0613219	0.75166		0.00089439	0.598617	0.919085
C5orf34	5		-0.000415486	0.709358	0.969906		-0.00192336	0.06459	0.75166		-0.001561	0.224204	0.767817
OR7A10	19		-0.000746057	0.711756	0.970452		-0.00365196	0.0618785	0.75166		0.00178734	0.468432	0.879681
FOXL2	3		-0.000481052	0.711811	0.970452		0.00237418	0.0628232	0.75166		0.000458959	0.76636	0.959892
NRIP1	21		0.000366927	0.714985	0.970801		-0.00167754	0.0623513	0.75166		-0.00265178	0.0180188	0.321486
BSDC1	1		0.000341189	0.713502	0.970801		0.0016129	0.0627147	0.75166		-0.000597662	0.567246	0.911321
HHAT	1		0.000297658	0.773112	0.978473		-0.0017543	0.062567	0.75166		-0.00120773	0.303949	0.815055
EIF5A2	3		-0.000259436	0.78011	0.978958		0.00164301	0.0619851	0.75166		0.00147035	0.184412	0.729956
KANK3	19		0.000256197	0.789705	0.980022		-0.00157237	0.0640899	0.75166		0.00145686	0.183077	0.729453
OR2W3	1		-0.00021382	0.791754	0.980044		-0.00145263	0.0645691	0.75166		-0.00121129	0.219487	0.764005
RELCH	18		-0.000224223	0.794859	0.980044		-0.00147376	0.0614198	0.75166		-0.000595315	0.544686	0.905064
INHBA	7		0.000179756	0.817748	0.98314		0.00140362	0.0616111	0.75166		0.00055049	0.56136	0.909608
ANKRD39	2		0.000269668	0.826182	0.983783		0.00216017	0.0627713	0.75166		0.00100513	0.488783	0.88715
NCAPG2	7		-0.00059432	0.841599	0.98633		-0.00551671	0.063294	0.75166		-0.00149233	0.69072	0.944291
DGAT2	11		0.000142963	0.851397	0.987511		0.00133077	0.0613705	0.75166		0.0011891	0.189478	0.735253
TMEM18	2		-0.000121162	0.88625	0.990532		-0.00154222	0.0631959	0.75166		-0.00111242	0.279076	0.799255
KIAA1109	4		0.000117302	0.895127	0.991125		0.00160221	0.0626711	0.75166		-0.000529598	0.6116	0.921854
ZNF253	19		0.000219258	0.901298	0.991676		-0.00297378	0.0621284	0.75166		-0.00137436	0.490626	0.888013
LSMEM2	3		-0.000111562	0.910088	0.993286		0.00176167	0.0647482	0.75166		0.000482228	0.682822	0.943127
ACOT13	6		9.34e-05	0.9266	0.994257		-0.00169964	0.0613096	0.75166		-0.0017955	0.123465	0.659299
NDE1	16		-0.000195092	0.92765	0.994257		-0.00386956	0.0617434	0.75166		0.000983348	0.706924	0.947109
KLK1	19		6.28e-05	0.932535	0.994733		-0.00123129	0.064719	0.75166		-0.00106005	0.208814	0.755977
NUDT14	14		-5.88e-05	0.942984	0.995283		-0.00142172	0.0633273	0.75166		-0.00106956	0.269735	0.792016
ALDH5A1	6		4.98e-05	0.956704	0.996356		-0.00152646	0.0641038	0.75166		-0.00148006	0.151756	0.691734
PUM3	9		7.07e-06	0.994902	0.998706		-0.00172917	0.0633457	0.75166		-0.00208438	0.0744778	0.569553
ZNF708	19		0.000826852	0.325055	0.876593		0.00147402	0.0649262	0.751783		0.00180199	0.0738325	0.567751
CSAG1	X		0.00648234	1.49e-10	5.7e-08		0.00155566	0.0657273	0.752738		-0.00406358	0.000331715	0.0253242
HDX	X		0.00206455	0.000766819	0.0313283		0.00103977	0.0656357	0.752738		-0.00113342	0.105861	0.634073
RAB41	X		0.00180123	0.0100023	0.2357		0.00126166	0.0658761	0.752738		-0.000473069	0.580019	0.914026
SMIM19	8		-0.00175995	0.0112728	0.254196		-0.0011807	0.0657111	0.752738		0.00126205	0.114623	0.647552
PLAGL2	20		-0.00237559	0.0421345	0.515682		-0.00195981	0.0653897	0.752738		0.00176201	0.181506	0.728328
AMPD2	1		-0.00155739	0.0448175	0.529493		0.00153947	0.0662624	0.752738		0.00304525	0.00270712	0.111357
ATAT1	6		0.00161258	0.0507263	0.555922		0.00147004	0.0660576	0.752738		0.000161325	0.873882	0.981024
MAK	6		-0.001705	0.0604996	0.584683		-0.00167098	0.0653506	0.752738		-0.00095695	0.389444	0.847553
PTMA	2		-0.00391322	0.0769736	0.62727		-0.00395583	0.0661273	0.752738		-0.000833504	0.752513	0.955995
DOK3	5		-0.00125577	0.204048	0.809564		-0.00171247	0.0655354	0.752738		0.00022275	0.846538	0.975619
CEP68	2		0.00153256	0.243057	0.840441		0.00215216	0.0658915	0.752738		-0.00185075	0.209535	0.756338
MTMR4	17		-0.00100717	0.303053	0.867371		-0.00168218	0.0659415	0.752738		4.38e-05	0.969766	0.996589
RDH5	12		0.00100988	0.306752	0.868079		0.00177084	0.0661411	0.752738		0.00080081	0.511585	0.895447
ADCY3	2		-0.00136906	0.307244	0.868079		-0.00236732	0.0657968	0.752738		0.000593154	0.71342	0.948857
PARK7	1		0.00078725	0.316819	0.873337		0.00136706	0.0662751	0.752738		-0.000933756	0.314897	0.818733
SYBU	8		-0.000784489	0.320152	0.874372		0.00153646	0.0655629	0.752738		0.000140348	0.890426	0.981594
SULT1B1	4		-0.000805655	0.328536	0.876836		0.00142748	0.065189	0.752738		0.000248717	0.790639	0.96589
PPP1R12A	12		0.00429573	0.343782	0.881015		0.00797126	0.0652472	0.752738		0.00612822	0.239915	0.776457
ST7L	1		-0.000823642	0.373139	0.892352		0.00170615	0.0662679	0.752738		0.000350263	0.754257	0.956854
FAM216A	12		-0.000645513	0.398459	0.897363		-0.00129089	0.0656215	0.752738		0.000343581	0.699985	0.945931
GTPBP2	6		-0.000874498	0.422311	0.906778		-0.00188204	0.06545	0.752738		-0.000423473	0.74514	0.95527
GPR182	12		-0.000840802	0.44495	0.912955		0.00184842	0.0663456	0.752738		-2.23e-05	0.985526	0.997295
TRIM36	5		-0.000536622	0.44704	0.913071		0.00126516	0.0652113	0.752738		0.00130394	0.12311	0.659299
KNOP1	16		0.000494953	0.534533	0.933196		0.0014	0.0659392	0.752738		-0.000119852	0.899677	0.982501
LMNTD2	11		0.000606608	0.541868	0.934138		-0.00158984	0.0661853	0.752738		-0.000326222	0.771845	0.96097
PEX11A	15		0.000496232	0.578399	0.94078		0.00150411	0.0652498	0.752738		-0.00133748	0.189167	0.734845
STOX2	4		0.00043336	0.614951	0.950676		-0.00146731	0.0654439	0.752738		-0.00185576	0.0665891	0.55025
RHCG	15		0.000191622	0.817717	0.98314		-0.00137303	0.0662948	0.752738		-0.00226955	0.0161624	0.305865
ZG16B	16		-0.000176177	0.822093	0.983488		-0.00133247	0.0663045	0.752738		-0.00107155	0.236051	0.77399
KCNQ2	20		-0.000159181	0.865259	0.988952		-0.00159611	0.0663218	0.752738		-0.000644706	0.555112	0.908282
ENAM	4		6.1e-05	0.930044	0.994377		0.00125218	0.0655914	0.752738		-0.000206054	0.80491	0.968482
OR1D2	17		7.21e-05	0.970679	0.997247		-0.00355159	0.0656765	0.752738		0.000301865	0.899555	0.982501
TMEM258	11		0.00373471	0.0179118	0.340878		0.00280875	0.0664937	0.753944		-0.00390825	0.0373668	0.442699
ING4	12		-0.00135182	0.0293854	0.448296		-0.00110418	0.0665863	0.753972		0.00164642	0.0310898	0.406196
MAP3K11	11		0.00215881	0.115665	0.706181		0.0023436	0.0666682	0.753972		-0.00237393	0.123671	0.660005
KIF14	1		-0.00331531	0.156622	0.757266		-0.00417843	0.0667054	0.753972		-0.00235637	0.395777	0.851074
COMMD8	4		0.00110967	0.471119	0.919777		-0.00253466	0.0666927	0.753972		-0.0029242	0.0972458	0.618017
FBXL17	5		0.000194144	0.83421	0.984514		-0.00163633	0.0666868	0.753972		-0.000187092	0.870722	0.981024
PTPRB	12		-0.00191289	0.0622239	0.590669		-0.00167596	0.0668756	0.753988		0.000679057	0.556062	0.908282
GTF3C4	9		0.00300898	0.176173	0.779425		0.0038079	0.0668598	0.753988		0.000798253	0.759139	0.957977
OR51G2	11		-0.000902136	0.309785	0.870019		-0.00146232	0.0668175	0.753988		0.000776006	0.443684	0.873358
SLC7A13	8		0.000632015	0.543365	0.934418		0.00189671	0.0669161	0.753988		0.00119535	0.362535	0.835906
MARCHF10	17		-4.37e-05	0.957544	0.996393		-0.00145765	0.0668843	0.753988		-0.000327678	0.744562	0.955024
KLHL15	X		0.00363487	0.000103091	0.00521741		0.00145143	0.067879	0.754759		-0.00345208	0.000623149	0.0407799
GPR132	14		0.00253739	0.0458068	0.532763		-0.00211107	0.0680737	0.754759		-0.00366528	0.0159718	0.303601
DSCAML1	11		-0.00168656	0.0514068	0.558195		-0.00146412	0.0671216	0.754759		0.000298764	0.763088	0.958622
CBY1	22		0.00144042	0.0966573	0.668879		0.00147287	0.0680434	0.754759		-0.000997656	0.32976	0.825368
SH3GL2	9		-0.00140654	0.128737	0.725739		-0.00152125	0.0675342	0.754759		-1.85e-05	0.985929	0.997295
ASB17	1		-0.00145276	0.139103	0.736895		-0.00160129	0.0674552	0.754759		0.00159822	0.146993	0.689423
MSRA	8		-0.000945895	0.173152	0.776231		-0.00120197	0.0678415	0.754759		0.00134324	0.104242	0.63194
IHH	2		-0.00124616	0.17527	0.778264		-0.00160342	0.0676235	0.754759		0.000567793	0.603903	0.920821
VXN	8		0.0012372	0.208468	0.815452		0.00177529	0.0679687	0.754759		0.000299677	0.806456	0.968483
SLC18A1	8		-0.00101163	0.232215	0.836294		-0.0014171	0.0672621	0.754759		-0.000420901	0.662839	0.936876
RCOR1	14		-0.00239555	0.271634	0.856575		-0.00361347	0.0679676	0.754759		0.002584	0.299329	0.811913
DPYD	1		0.00103998	0.292911	0.866281		0.00166201	0.0677181	0.754759		-0.000112956	0.919833	0.98755
PLAA	9		0.00125102	0.366971	0.891117		-0.00214402	0.0675076	0.754759		-0.00158673	0.29118	0.807975
B3GNT3	19		0.000965026	0.375651	0.892418		0.00194993	0.0676876	0.754759		-0.00193815	0.139296	0.681157
SH3BP4	2		0.000625313	0.433151	0.91018		-0.00143135	0.0675774	0.754759		-0.00095562	0.334429	0.828471
SERPINI2	3		0.00061064	0.434512	0.910477		0.00137873	0.0679888	0.754759		-0.000647255	0.484949	0.886461
KIF26A	14		0.000861107	0.436034	0.911265		-0.00187817	0.067245	0.754759		-0.00142775	0.278434	0.799037
TRIM52	5		-0.000560296	0.512019	0.927168		-0.0014961	0.0676555	0.754759		-0.00106159	0.302321	0.813945
DCST1	1		0.000707756	0.52222	0.930834		0.00192829	0.0673783	0.754759		-0.000990577	0.43662	0.870101
TTC24	1		0.000601758	0.553218	0.936254		0.00184106	0.0673599	0.754759		0.000276831	0.819808	0.971227
VIPR1	3		0.000478723	0.562494	0.937454		0.00148198	0.0680081	0.754759		-0.000455965	0.650622	0.932411
SERPINF1	17		0.000439407	0.719507	0.970801		-0.00190238	0.0677823	0.754759		-0.000592215	0.665859	0.937679
CCNC	6		0.000874469	0.748477	0.976191		-0.00457356	0.0671929	0.754759		-0.00280864	0.376088	0.841318
FAM83E	19		-0.000289182	0.801366	0.980293		-0.00207259	0.0676581	0.754759		-0.000790769	0.574673	0.913189
KRTAP10.3	21		-7.2e-05	0.943139	0.995283		-0.00179525	0.0674131	0.754759		-9.89e-06	0.993821	0.998922
HOXA10	7		6.64e-05	0.95032	0.996011		0.00182028	0.0677026	0.754759		-0.000733637	0.548407	0.905748
SPATA22	17		0.000766779	0.409465	0.901434		-0.00150444	0.0681809	0.754935		-0.000495288	0.647662	0.93137
PHB2	12		0.0016022	0.521389	0.930724		0.00409828	0.0681451	0.754935		0.00487407	0.0847663	0.592922
CDX2	13		0.000667857	0.552136	0.936254		-0.00185168	0.0682153	0.754935		-0.0017706	0.166552	0.711806
KCNB1	20		-0.00133286	0.068434	0.607078		-0.00127623	0.0683291	0.754994		0.000777077	0.367213	0.838504
PAQR9	3		0.000516862	0.536677	0.933969		0.00152803	0.0683463	0.754994		0.000945173	0.378977	0.843283
SF3B1	2		-0.000488327	0.86082	0.988388		-0.00486487	0.0682778	0.754994		-0.0029674	0.374324	0.840907
PAXIP1	7		-0.00393764	0.150663	0.75427		-0.00498167	0.0686266	0.75523		0.000443767	0.894378	0.981594
TTC16	9		-0.000589144	0.434976	0.910477		-0.00131488	0.068523	0.75523		-0.000124005	0.889309	0.981594
VRK1	14		-0.00241209	0.439134	0.911452		-0.00539941	0.0686502	0.75523		0.00366538	0.314529	0.818733
FRMD5	15		0.000243399	0.701145	0.969143		0.00111623	0.0684924	0.75523		0.000609341	0.429303	0.867782
JCHAIN	4		-0.00018901	0.774831	0.978473		0.00110471	0.0686748	0.75523		8.88e-05	0.905651	0.985015
HOPX	4		0.000123126	0.879795	0.989362		0.00140519	0.068703	0.75523		0.00155685	0.103525	0.631625
PRKG1	10		0.000104433	0.883329	0.989673		0.00122783	0.0685091	0.75523		-0.000133196	0.870353	0.980999
H2AJ	12		4.6e-06	0.997155	0.999391		-0.00209929	0.0686719	0.75523		0.000240971	0.872927	0.981024
BCL9	1		0.00171508	0.159842	0.757776		0.00200626	0.0689121	0.756314		0.000377929	0.791513	0.965928
CDPF1	22		-0.00105273	0.410015	0.901543		-0.00214942	0.0689275	0.756314		-0.00155247	0.290633	0.807975
CDR2	16		0.000264078	0.73818	0.974426		-0.0013303	0.0689206	0.756314		-0.000291115	0.755224	0.956873
SNX11	17		-0.00222711	0.0471521	0.53777		-0.00183443	0.0689723	0.756344		0.000179126	0.884706	0.981594
DUSP7	3		-0.000543507	0.565268	0.937679		0.0016938	0.0690565	0.756807		0.00164944	0.150557	0.691734
OR6S1	14		-0.00104419	0.247091	0.841306		0.00158883	0.0691023	0.756848		0.00116518	0.282873	0.801843
CASK	X		0.00233449	0.00111053	0.0431216		0.00121972	0.0697603	0.757217		-0.00134851	0.110571	0.641255
KIF23	15		-0.00536003	0.0224647	0.385106		-0.00390879	0.0705289	0.757217		0.00308107	0.255249	0.783388
OR5C1	9		-0.00183522	0.0262521	0.423873		-0.00143503	0.0701534	0.757217		0.00289497	0.00408285	0.146813
PNO1	2		-0.00429637	0.0290087	0.444967		-0.00345765	0.0700005	0.757217		0.0018435	0.433554	0.868528
RIPOR1	16		-0.00186524	0.0350536	0.478455		-0.00151604	0.0702066	0.757217		0.00155133	0.135395	0.676597
DEFB112	6		-0.00134514	0.0424171	0.516864		-0.00114692	0.06986	0.757217		0.000969577	0.214367	0.760969
FDPS	1		-0.00563804	0.0433763	0.521189		-0.00493464	0.0702935	0.757217		0.00517869	0.123932	0.66081
CYP26A1	10		0.00196647	0.0644665	0.599325		0.00183762	0.0694402	0.757217		-0.0014453	0.262117	0.788268
PDC	1		0.00147466	0.0688876	0.609003		0.00129047	0.0701757	0.757217		-0.000431217	0.63777	0.928655
CXCL3	4		0.00170701	0.0977168	0.670674		0.00170765	0.0704856	0.757217		-0.000533884	0.661233	0.936208
RWDD4	4		-0.00173802	0.101738	0.679273		-0.00175773	0.0700305	0.757217		0.000678429	0.580545	0.914026
MYOZ3	5		-0.00118089	0.105337	0.688129		-0.00126663	0.0695924	0.757217		-0.000624615	0.470089	0.880151
FIS1	7		-0.00394147	0.112802	0.701092		-0.00443444	0.0706405	0.757217		0.00285585	0.343475	0.831689
ERMARD	6		-0.00128394	0.118725	0.709619		-0.00142419	0.0700963	0.757217		-0.000226382	0.816968	0.970867
RAB40C	16		0.00183516	0.119315	0.710721		-0.00183808	0.0705383	0.757217		-0.00322997	0.0132198	0.280214
SH3BGRL3	1		-0.00172409	0.132652	0.728574		0.00199514	0.0704674	0.757217		0.00210789	0.119339	0.652742
ZNF260	19		-0.001095	0.151582	0.75427		-0.00128123	0.0698978	0.757217		0.00111411	0.204165	0.750397
DDB1	11		0.00343111	0.162717	0.76075		0.00398046	0.0704598	0.757217		0.00191016	0.484217	0.886353
FAM153A	5		-0.00092136	0.260903	0.852124		-0.00141659	0.0695583	0.757217		-1.17e-05	0.990422	0.998067
ATXN7L1	7		0.00114194	0.267223	0.854929		0.00170656	0.0696753	0.757217		0.000533203	0.652936	0.933572
CHRNB1	17		0.000837968	0.29436	0.866612		0.00137864	0.0699267	0.757217		-0.000698386	0.457922	0.876674
SP7	12		-0.000860743	0.339466	0.881015		0.00165289	0.0694306	0.757217		0.00161137	0.145374	0.689346
MYDGF	19		-0.000976136	0.339729	0.881015		-0.00171296	0.0694346	0.757217		-0.000433538	0.715092	0.948857
ADAMTS18	16		0.000599501	0.439601	0.911584		0.00132943	0.0699868	0.757217		-0.00114971	0.210008	0.756643
MAP2K2	19		-0.00144088	0.453056	0.914621		-0.00316341	0.0696113	0.757217		-0.00262427	0.226933	0.76934
FAM229B	6		-0.00054621	0.511427	0.927168		-0.00141397	0.0699124	0.757217		-0.000345875	0.72755	0.951839
IFI16	1		-0.000489779	0.567919	0.93883		0.00144012	0.0700415	0.757217		0.00133464	0.171651	0.71746
PRMT6	1		-0.000468496	0.569721	0.939693		0.00146026	0.0707031	0.757217		0.00160381	0.106646	0.636663
OR7G1	19		-0.000563123	0.645939	0.954359		-0.00202218	0.0705369	0.757217		0.00158114	0.26971	0.792016
FAM218A	4		-0.000469493	0.648455	0.954852		-0.00170518	0.069877	0.757217		-0.000738085	0.530871	0.901141
SLC6A17	1		0.000520321	0.654735	0.956409		0.00200582	0.0702749	0.757217		-0.00109183	0.412118	0.858604
GPRIN3	4		0.000323428	0.727198	0.971889		0.0015094	0.070817	0.757217		-0.000600439	0.558217	0.908282
KCNIP1	5		0.000235978	0.746766	0.975387		-0.00127305	0.0700246	0.757217		-0.000380948	0.663202	0.93699
FBXO28	1		0.000378311	0.802181	0.980293		-0.00254724	0.0701894	0.757217		-0.00211842	0.238989	0.776414
EVI5	1		0.000161657	0.843911	0.986863		0.00148385	0.0694185	0.757217		0.000612248	0.536262	0.90149
ERV3.1	7		-0.000105828	0.897796	0.991125		-0.00144041	0.0706727	0.757217		0.000645102	0.522357	0.898085
PCDHGC4	5		-9.13e-05	0.904919	0.992429		0.00132423	0.0695721	0.757217		0.00109169	0.22541	0.76877
ZNF716	7		0.000140199	0.908234	0.993181		-0.00212148	0.0707436	0.757217		-1.54e-05	0.99174	0.998538
RSPH9	6		0.000131513	0.911391	0.993286		-0.00184957	0.0707967	0.757217		-0.00110972	0.403022	0.854182
CAAP1	9		7.16e-05	0.934615	0.994872		-0.00137855	0.0707155	0.757217		-0.000874704	0.366991	0.838504
ACR	22		0.000385583	0.717983	0.970801		-0.00169067	0.070903	0.757237		-0.00167481	0.157083	0.699312
ETNK2	1		0.00035404	0.728949	0.972102		0.00172324	0.070867	0.757237		0.000978277	0.405535	0.854499
FAM168B	2		-0.000635455	0.361508	0.889308		-0.00123615	0.0710545	0.757951		-0.000342507	0.69403	0.944632
TRIM13	13		-0.000567117	0.436252	0.911287		0.00126781	0.0710961	0.757951		0.000119206	0.889416	0.981594
GFPT2	5		0.000710891	0.498843	0.924447		-0.00175517	0.071043	0.757951		-0.00275408	0.0240444	0.364673
C1orf141	1		-0.00230358	0.00466309	0.135508		-0.00142854	0.0714207	0.75878		0.00172213	0.0755406	0.573059
DCT	13		-0.00183848	0.0342562	0.477335		-0.00163239	0.071412	0.75878		0.000713227	0.521811	0.897849
MSS51	10		0.00229977	0.0653438	0.602816		0.00201393	0.0715768	0.75878		-0.00257651	0.0692904	0.555189
ARHGEF39	9		-0.00134905	0.116601	0.707479		-0.00150407	0.0715023	0.75878		0.000307672	0.77134	0.96097
RAB34	17		-0.00130287	0.186745	0.793526		0.00189435	0.071553	0.75878		0.00201637	0.112237	0.644965
GYG1	3		-0.00095918	0.218882	0.823027		0.0014343	0.0713603	0.75878		0.000917458	0.339887	0.830451
MYO18B	22		-0.00126495	0.24422	0.840518		-0.00184975	0.0714545	0.75878		0.00158817	0.22065	0.765073
RBMX2	X		-0.00238398	0.387213	0.894143		-0.00477691	0.0715949	0.75878		0.00179323	0.584528	0.915142
EMC10	19		-0.000811722	0.43053	0.908802		-0.00177796	0.0715144	0.75878		0.000133569	0.915791	0.987481
BRIX1	5		0.000587599	0.811589	0.982416		0.004152	0.071593	0.75878		0.00348944	0.226511	0.768848
C17orf99	17		-0.000221587	0.820625	0.983193		-0.001699	0.0716874	0.759313		-0.000146056	0.902652	0.983514
LOXL3	2		0.00136426	0.166921	0.766013		0.00169234	0.0717352	0.759374		-0.001219	0.290888	0.807975
CDK14	7		-0.000291783	0.693844	0.967552		0.00133581	0.0717798	0.759399		0.00127746	0.164397	0.709992
GUCY2F	X		0.00460767	2.09e-07	2.35e-05		0.00149872	0.0719569	0.759413		-0.00368998	0.000365569	0.0275584
NEDD1	12		0.00183038	0.510315	0.926929		0.00470499	0.0719919	0.759413		0.00384256	0.235184	0.77399
ZBTB12	6		0.000742822	0.522258	0.930834		-0.00199025	0.0719906	0.759413		-0.00251114	0.0670781	0.55025
PHAX	5		0.000411402	0.823788	0.983783		0.00313051	0.0718622	0.759413		-0.000791325	0.714716	0.948857
MAML1	5		0.000111835	0.928239	0.994257		-0.00196617	0.0719564	0.759413		-0.00197661	0.150731	0.691734
OPA1	3		-0.00278018	0.177617	0.781635		-0.00352904	0.0720904	0.759563		-4.9e-05	0.983704	0.997152
DDX31	9		-0.000472657	0.64645	0.954482		-0.00161581	0.0720743	0.759563		-0.00265508	0.0169602	0.312126
NPAS3	14		-0.000885965	0.2763	0.858627		0.00144566	0.0721903	0.759742		0.000937833	0.341629	0.830581
NRDE2	14		-0.00134225	0.524494	0.930955		-0.00364559	0.0721918	0.759742		-0.00576327	0.0195722	0.334527
RARG	12		0.00166888	0.204145	0.809564		0.00233218	0.0722918	0.760313		-0.00124503	0.431675	0.867901
CCDC126	7		-0.000310063	0.625512	0.952633		0.0011133	0.0723304	0.760313		0.000984991	0.199965	0.746843
AKAP1	17		-0.00207261	0.0204151	0.37		-0.00152924	0.0723976	0.760575		0.00065794	0.52916	0.899525
SELENBP1	1		-0.000181985	0.860791	0.988388		0.0018833	0.0724413	0.760591		-0.000104536	0.933319	0.990895
ZCCHC12	X		0.00432095	4.67e-10	1.4e-07		0.00113647	0.0729572	0.761158		-0.00340313	3.42e-05	0.00405688
MTMR8	X		0.00380875	1.7e-06	0.000136139		0.001284	0.0729356	0.761158		-0.00250678	0.00594016	0.183741
TRPC4AP	20		-0.00204176	0.0323839	0.469368		-0.00155008	0.07296	0.761158		0.0013025	0.216644	0.762793
MPL	1		-0.00205037	0.0726698	0.617925		-0.00170663	0.072831	0.761158		0.000767176	0.510108	0.89504
CUL3	2		-0.00404489	0.0764416	0.626877		-0.00399311	0.0726906	0.761158		0.0031502	0.254542	0.783388
CCDC47	17		-0.00202672	0.0874619	0.646447		-0.0019171	0.0726423	0.761158		-0.00145595	0.2627	0.788268
TEX101	19		0.00112908	0.299605	0.866887		0.00181076	0.0728059	0.761158		-0.000390671	0.755404	0.956873
SLC43A3	11		-0.000950343	0.321832	0.87454		0.00164486	0.0728815	0.761158		0.000278286	0.801405	0.967537
SGF29	16		-0.00214078	0.468518	0.918769		-0.00489278	0.0727867	0.761158		0.00447246	0.200206	0.747005
SGSM2	17		-0.000253594	0.756155	0.977207		-0.00132503	0.0729	0.761158		0.000261789	0.782011	0.961842
OR4C11	11		3.47e-05	0.966834	0.997126		0.0014666	0.0726839	0.761158		0.00129472	0.199264	0.745522
ZNF329	19		-0.000441742	0.657931	0.958184		-0.00164914	0.073015	0.761291		-0.00193945	0.0927235	0.611717
CELF1	11		0.000890081	0.500582	0.924447		0.00235506	0.0731173	0.761917		-0.00120049	0.451222	0.875119
CCAR1	10		-0.00128816	0.576725	0.940089		0.00417549	0.0732259	0.762608		0.00253682	0.367397	0.838504
RAB33B	4		-0.000885869	0.262381	0.852124		-0.00135189	0.0732958	0.762702		-0.00179979	0.0545381	0.506502
BCL2L15	1		-0.000746805	0.30241	0.86732		0.00131286	0.0733232	0.762702		0.00181709	0.0408796	0.454958
RGR	10		-7.83e-05	0.937353	0.995046		0.00177511	0.0734043	0.762702		-3.86e-05	0.974385	0.996604
ACACB	12		-4.07e-05	0.968937	0.997247		-0.00162006	0.0733844	0.762702		-0.00215812	0.0546265	0.506869
GPR31	6		0.000794662	0.474369	0.92068		-0.00175369	0.0734836	0.763085		-0.00244787	0.0451617	0.467094
RNASEH1	2		-0.00236468	0.0521363	0.5608		-0.00208948	0.0735631	0.763472		0.000667241	0.64164	0.929552
MINDY4	7		-0.00145324	0.0731309	0.617981		0.00136839	0.0738168	0.763871		0.000517897	0.579521	0.914026
CALHM3	10		0.00152845	0.080282	0.634513		0.00141896	0.0737467	0.763871		-0.00102692	0.306484	0.817084
GLDC	9		-0.00137076	0.113725	0.703994		-0.00144778	0.0737701	0.763871		-0.000735661	0.467264	0.879681
GABBR2	9		0.00121989	0.1365	0.735441		0.00138698	0.073856	0.763871		-0.000391262	0.693733	0.944632
EQTN	9		0.000319107	0.616527	0.950676		-0.00115385	0.0736617	0.763871		0.000354367	0.658196	0.935519
RANBP6	9		-0.000421345	0.675389	0.962876		-0.00163827	0.0738293	0.763871		-0.0007192	0.531421	0.90137
ZNF568	19		-0.00238983	0.0166037	0.326226		-0.00164484	0.0740539	0.764601		0.0025379	0.0276647	0.388281
CATSPERE	1		0.000344679	0.672146	0.962032		-0.00138684	0.0740434	0.764601		-0.00231658	0.015497	0.29978
TRIM69	15		0.000123025	0.892072	0.991125		0.00156933	0.0740508	0.764601		-7.05e-05	0.947939	0.993602
GBA2	9		-0.00108015	0.192687	0.798286		-0.00135118	0.0741408	0.76506		-6.34e-06	0.994738	0.999037
UPRT	X		0.00536434	3.66e-08	5.28e-06		0.00150307	0.0743862	0.765469		-0.00383617	0.000504504	0.0351363
ZNF746	7		0.00165171	0.0966069	0.668879		-0.00153415	0.0743534	0.765469		-0.00180701	0.102251	0.629183
GRM8	7		-0.00122512	0.134777	0.732546		-0.00140293	0.0746413	0.765469		0.00158205	0.106612	0.636663
DPP9	19		-0.00145418	0.187608	0.793982		-0.0018864	0.0746691	0.765469		-0.00218536	0.0908557	0.607402
TSPO2	6		-0.000988897	0.191244	0.797234		0.00135065	0.0746066	0.765469		0.0015498	0.0963196	0.617357
CDKN1B	12		0.00166092	0.223504	0.829258		0.00230563	0.0747019	0.765469		0.000234874	0.884165	0.981594
OR5AK2	11		-0.000982048	0.281833	0.862248		-0.00163709	0.0746841	0.765469		-6.7e-05	0.952851	0.994409
GRIN3A	9		0.000960194	0.379386	0.892945		0.00189607	0.0745265	0.765469		-0.000242995	0.852505	0.976327
SNURF	15		0.000635555	0.40983	0.901543		0.00131014	0.0743706	0.765469		-0.000848633	0.353957	0.833154
GPD1L	3		-0.000846545	0.432807	0.91018		0.00169673	0.0747327	0.765469		0.000482941	0.68286	0.943127
F2R	5		0.000851678	0.487105	0.924087		0.00210492	0.0743172	0.765469		-0.000777195	0.596611	0.918764
DVL3	3		-0.000137479	0.899407	0.991567		0.00187334	0.0745145	0.765469		7.05e-05	0.955865	0.994584
CLUAP1	16		-6.14e-05	0.938108	0.995046		-0.00130338	0.0745015	0.765469		-0.000467781	0.610259	0.921808
DEFB128	20		-0.00149253	0.0130575	0.279975		-0.00104482	0.0753155	0.766392		0.00056756	0.435146	0.868941
GPAM	10		0.0020968	0.0157816	0.319121		0.00145593	0.0753935	0.766392		-0.00190445	0.0655415	0.545685
ATXN3L	X		0.0010041	0.109891	0.69617		0.00100354	0.0749534	0.766392		-0.000856359	0.219638	0.764236
CRYGS	3		0.00125058	0.125781	0.719886		0.00142438	0.0753897	0.766392		-0.000215395	0.828806	0.9719
IL22RA2	6		-0.00102616	0.159985	0.757776		-0.00124091	0.0751681	0.766392		0.000409759	0.635002	0.9281
CPT1C	19		0.000993241	0.208423	0.815452		-0.00129629	0.0749589	0.766392		-0.00207019	0.0261429	0.378935
WDR93	15		0.000988789	0.237067	0.838571		-0.00131613	0.0753254	0.766392		-0.00130566	0.176215	0.721963
INTS12	4		0.00278171	0.301141	0.867079		0.0044896	0.0753604	0.766392		-0.00366317	0.232684	0.772767
GATA2	3		-0.000852428	0.39415	0.895301		-0.00174004	0.0754184	0.766392		0.000198858	0.868519	0.980999
RAD50	5		-0.000977846	0.43002	0.908202		-0.00205419	0.0753264	0.766392		0.0015492	0.291946	0.808557
MAPK3	16		0.000792621	0.451484	0.913908		-0.00172213	0.0751239	0.766392		-0.00043875	0.727695	0.951839
KRTAP23.1	21		-0.000529075	0.545407	0.93449		-0.00137483	0.0749299	0.766392		-0.000301482	0.756728	0.957084
INVS	9		0.000273856	0.654516	0.95636		0.000999767	0.0751802	0.766392		0.000439708	0.528132	0.899525
GABPB2	1		-0.000522501	0.664026	0.960092		0.00206142	0.0751252	0.766392		0.00124813	0.371262	0.839598
CDK2AP2	11		0.00129189	0.323949	0.875706		0.00228237	0.0755075	0.766865		-0.000245896	0.875434	0.981024
ADAMTSL4	1		0.00177831	0.155729	0.75656		0.00215468	0.075574	0.767041		0.000200052	0.89543	0.981791
UXS1	2		0.000533149	0.808468	0.981686		0.00435629	0.07561	0.767041		0.00192808	0.506619	0.893203
NEK9	14		0.000841776	0.385811	0.894132		0.00169085	0.075711	0.767634		-0.00200875	0.0775635	0.57701
SIRPB2	20		-0.00175852	0.0651295	0.602591		-0.00161422	0.0757609	0.767707		-0.00220302	0.0433235	0.461732
TMEM139	7		-0.000667267	0.481403	0.922731		-0.00164737	0.0759324	0.768581		-0.000985091	0.393969	0.849898
RAX2	19		-0.000528176	0.571981	0.939974		-0.00153947	0.0759223	0.768581		-0.0010636	0.331674	0.826523
SPOCK1	5		-0.00109556	0.179937	0.782803		-0.00139044	0.0761769	0.769759		0.000524465	0.588209	0.916544
FNBP1L	1		-0.000537816	0.499762	0.924447		0.00139979	0.0762155	0.769759		0.00259573	0.00838764	0.222563
NPLOC4	17		0.000885532	0.737113	0.974426		-0.0044587	0.0762617	0.769759		-0.000976078	0.756714	0.957084
SLC7A5	16		-0.000500235	0.859792	0.988375		-0.0048345	0.0761363	0.769759		-4.21e-05	0.989996	0.998041
H2AC16	6		8.77e-06	0.9928	0.998706		-0.00159656	0.0762624	0.769759		0.000322755	0.779616	0.961496
AMMECR1	X		0.00404201	7.38e-07	6.71e-05		0.00125237	0.0763213	0.769878		-0.00413056	3.03e-06	0.000682693
TRAPPC2L	16		-0.00257894	0.161357	0.758856		-0.00306217	0.0765806	0.769878		0.000684372	0.748574	0.95527
SLC7A11	4		-0.0021313	0.174934	0.778264		-0.00242866	0.076397	0.769878		0.000414941	0.80595	0.968483
TJP3	19		0.000586729	0.593869	0.944596		-0.00173978	0.0765865	0.769878		-0.00248263	0.0459631	0.470521
CALU	7		-0.000289373	0.747852	0.975957		-0.00144906	0.0766038	0.769878		-0.00111558	0.272316	0.793547
SPCS2	11		-0.000283536	0.913644	0.993286		-0.00439495	0.0764456	0.769878		-0.00225849	0.468175	0.879681
PGPEP1L	15		-0.000109208	0.913553	0.993286		-0.00161477	0.0766161	0.769878		0.000102251	0.929763	0.989984
SGCB	4		4.04e-05	0.954043	0.996356		0.00124432	0.0766085	0.769878		0.000331172	0.699049	0.945919
TEX11	X		0.00211467	0.00305113	0.0994072		0.0011544	0.0773294	0.770258		-0.00143591	0.0868555	0.59898
GPRASP1	X		0.00176966	0.00701581	0.184443		0.00103809	0.0768699	0.770258		-0.00121882	0.0985644	0.622364
USP11	X		0.00172239	0.0211883	0.377157		0.00121231	0.077441	0.770258		-0.0010146	0.239463	0.776457
LCOR	10		0.00127126	0.073196	0.617981		0.00118224	0.0776864	0.770258		-0.000673745	0.416035	0.859917
RFPL3	22		-0.00136252	0.0744452	0.622313		0.00126051	0.0772298	0.770258		0.00142779	0.103688	0.631761
METTL5	2		-0.00201669	0.105783	0.688133		-0.00203398	0.0768566	0.770258		-0.00177545	0.204388	0.75067
CAMSAP2	1		0.00196581	0.132136	0.728216		0.00229543	0.0777569	0.770258		-0.0022819	0.147962	0.689971
ELAC2	17		0.00367672	0.144971	0.74642		0.00410723	0.0776171	0.770258		0.00159019	0.58996	0.916918
MTPN	7		-0.00118641	0.170968	0.773228		-0.00140523	0.0772649	0.770258		0.00179951	0.0746391	0.569819
RABGAP1	9		-0.000890669	0.180135	0.782803		-0.00107526	0.0776307	0.770258		0.000659087	0.383796	0.844696
TRIM21	11		-0.00111686	0.190961	0.797234		-0.00140799	0.0773875	0.770258		0.00108996	0.282961	0.801843
OR2T6	1		-0.00101775	0.204101	0.809564		-0.0013171	0.0780275	0.770258		-9.69e-05	0.91666	0.98755
CCL22	16		-0.00088671	0.240013	0.839734		-0.00125503	0.0774448	0.770258		0.00100464	0.260321	0.786519
UGT1A5	2		-0.00092339	0.276446	0.858627		-0.00139927	0.0777518	0.770258		0.000134577	0.8917	0.981594
C15orf39	15		0.000967055	0.284585	0.86457		-0.00145539	0.0783196	0.770258		-0.00122486	0.255407	0.783388
IL15	4		0.000736165	0.29336	0.866612		0.00116397	0.0767063	0.770258		0.0013424	0.104085	0.631761
AP4M1	7		-0.00103185	0.30685	0.868079		0.00177381	0.078083	0.770258		0.000770908	0.528253	0.899525
GIMAP5	7		-0.000807957	0.316019	0.872947		-0.00129834	0.078357	0.770258		-0.00016983	0.853306	0.976608
DHDDS	1		0.0025467	0.348644	0.884347		0.00462707	0.0775951	0.770258		0.0020625	0.521173	0.897624
ATP5MJ	14		-0.00102442	0.36412	0.890634		-0.00175976	0.0782026	0.770258		0.000196229	0.877464	0.981044
PNPLA3	22		-0.000745754	0.37705	0.892945		-0.00142765	0.077812	0.770258		-0.000379069	0.706087	0.947109
CHML	1		-0.000741631	0.387393	0.894143		-0.00145773	0.0780134	0.770258		-0.00058682	0.570261	0.911923
DPP10	2		0.000749601	0.407888	0.901035		0.00143644	0.0782222	0.770258		0.000527149	0.611687	0.921854
C11orf16	11		0.000653968	0.438506	0.911452		-0.00136392	0.0778264	0.770258		-0.00103877	0.296731	0.811203
WFDC11	20		-0.000600938	0.464663	0.918568		-0.001402	0.0781494	0.770258		-3.7e-06	0.997023	0.999402
PRLH	2		-0.000669977	0.464955	0.918752		-0.00140232	0.078102	0.770258		6.56e-06	0.994755	0.999037
TMEM222	1		-0.00054017	0.520528	0.930724		-0.00137137	0.0771907	0.770258		0.0013363	0.176869	0.722814
LAMB1	7		-0.000595876	0.532686	0.932693		-0.00159662	0.0775983	0.770258		-0.000637722	0.576692	0.913894
KCNC4	1		0.000626623	0.619447	0.951238		0.00227373	0.077923	0.770258		0.000134066	0.932838	0.99087
ANO7	2		0.00034507	0.638917	0.953323		-0.00118026	0.0782948	0.770258		-0.00206213	0.0134339	0.28275
BUB3	10		0.00137892	0.646046	0.954396		0.00476233	0.0780662	0.770258		0.00222826	0.506515	0.893203
HOGA1	10		0.000356532	0.670142	0.961509		-0.00130843	0.0770885	0.770258		0.000131142	0.892033	0.981594
UTRN	6		-0.000292155	0.695496	0.9682		-0.00126253	0.0771471	0.770258		-0.00188573	0.0355202	0.432355
BCAR3	1		-0.000469285	0.699023	0.968922		0.00222021	0.0783484	0.770258		0.00172204	0.253636	0.782479
OAS3	12		0.000380491	0.720951	0.970801		-0.001779	0.0768753	0.770258		-0.00324319	0.0105811	0.249893
C8orf74	8		-0.000250667	0.749391	0.976191		-0.00132604	0.078364	0.770258		0.000167367	0.858844	0.977902
RSRP1	1		-0.000246051	0.811303	0.982351		-0.00161549	0.0777882	0.770258		-0.000445921	0.701759	0.946404
NAA60	16		0.000139879	0.870233	0.988952		-0.0014233	0.0779234	0.770258		-0.00100824	0.322497	0.82245
TSHZ1	18		0.000103766	0.88	0.989362		0.00113849	0.0772956	0.770258		0.00122267	0.132558	0.672573
FBXO46	19		-3.99e-05	0.966419	0.997126		0.00165429	0.0777247	0.770258		0.000112748	0.921598	0.987772
PGAP3	17		0.00165824	0.122541	0.715513		0.00212579	0.0785948	0.770425		-0.00135952	0.364486	0.837089
RASGRF1	15		-0.0011893	0.146973	0.74642		-0.001314	0.0785104	0.770425		8.35e-05	0.928446	0.989792
PRB4	12		0.000642342	0.542114	0.934158		-0.00170117	0.078539	0.770425		-0.00277682	0.0230952	0.360785
CUTC	10		0.000383914	0.580509	0.940899		0.00117261	0.0785818	0.770425		0.000641219	0.451279	0.875119
WFDC9	20		-0.000100969	0.899684	0.991567		-0.00132664	0.0784485	0.770425		-0.000879925	0.351452	0.833154
PAXX	9		-0.000549733	0.589583	0.94372		-0.00156446	0.0787064	0.7711		-0.00122387	0.277814	0.798433
NBN	8		0.000300602	0.779559	0.978584		0.00181339	0.0788547	0.772133		0.00162142	0.202331	0.74836
LGI3	8		-0.000261796	0.714097	0.970801		-0.00119184	0.0789374	0.772524		-0.0009966	0.235865	0.77399
BBC3	19		-0.000170564	0.869006	0.988952		-0.00172072	0.0790314	0.773023		-0.000735744	0.544816	0.905116
GPR137B	1		-0.000704404	0.520922	0.930724		-0.00168362	0.0790996	0.77327		-0.000897504	0.45331	0.875379
KMT2C	7		-0.00186498	0.287125	0.86457		-0.0027222	0.0791488	0.773332		-0.00401226	0.0294791	0.397923
KCNH6	17		-0.00239958	0.0344944	0.478066		-0.0018922	0.079225	0.773657		0.00154021	0.248186	0.778589
HMGCS1	5		-0.00749004	0.0407572	0.511566		-0.00621345	0.0793762	0.773882		0.0136689	0.0019997	0.0907519
TNFSF13B	13		0.000927235	0.310007	0.870019		-0.00151428	0.0793596	0.773882		-0.00235601	0.0303289	0.402399
GNA13	17		-0.00104427	0.484919	0.923846		-0.00247823	0.0794293	0.773882		-8.8e-05	0.96023	0.995595
TM9SF4	20		-0.000688767	0.577209	0.940107		-0.00208747	0.0793811	0.773882		-0.00018878	0.897903	0.982278
GLRX3	10		-0.00137083	0.597312	0.945659		-0.00423941	0.0795603	0.773882		-0.00315342	0.294581	0.810128
IGSF5	21		0.000308826	0.716156	0.970801		-0.0013485	0.0795214	0.773882		-0.000209049	0.830071	0.9719
GPATCH4	1		-0.000242406	0.823433	0.983783		0.0018527	0.0795916	0.773882		0.000885836	0.487247	0.886692
BOK	2		5.33e-05	0.954629	0.996356		-0.00154124	0.0795751	0.773882		-0.000849179	0.44528	0.874098
NSUN3	3		7.3e-06	0.993741	0.998706		0.0015691	0.0796808	0.77433		-0.000122526	0.910306	0.986169
ETS2	21		-0.000239725	0.83141	0.9843		-0.00178992	0.0797556	0.774639		-0.00250478	0.0465304	0.473485
HLA.G	6		-0.00114943	0.181922	0.786433		-0.00143182	0.0799206	0.775824		0.000140327	0.891269	0.981594
MYC	8		0.00765791	0.0845068	0.642529		0.00734229	0.0803474	0.776226		0.00140636	0.786122	0.963755
GPLD1	6		-0.00129345	0.0941859	0.665419		-0.00135082	0.0803944	0.776226		-0.000206144	0.830016	0.9719
PYY	17		-0.00142997	0.116742	0.707479		-0.00146576	0.0800385	0.776226		0.00105125	0.325865	0.824134
ZFAT	8		-0.00216732	0.119908	0.712762		-0.00224468	0.0803426	0.776226		0.00201134	0.211254	0.757211
SARNP	12		0.00224238	0.288574	0.86457		-0.00332887	0.0801636	0.776226		-0.00456057	0.0593437	0.523858
LRRN4	20		-0.00060013	0.369552	0.891506		-0.00112336	0.0803555	0.776226		-0.000424887	0.595931	0.918525
ZNF585B	19		-0.000548176	0.456314	0.915665		-0.00123821	0.0801536	0.776226		0.000251729	0.780392	0.961587
DYNC1LI1	3		-0.000855441	0.536703	0.933969		-0.00217538	0.0802911	0.776226		0.00148607	0.353079	0.833154
ARL5A	2		-0.000246626	0.783355	0.979722		-0.00151953	0.080436	0.776226		-0.000304427	0.779625	0.961496
LRPAP1	4		9.82e-05	0.912448	0.993286		-0.00152763	0.0802931	0.776226		-0.000691385	0.531553	0.90137
CYB5R1	1		7.13e-05	0.932375	0.994733		0.00142547	0.0800713	0.776226		0.000904075	0.380568	0.844419
GPC3	X		0.00462994	1.94e-08	3.12e-06		0.00131386	0.0807476	0.776333		-0.00328014	0.000700775	0.0444573
ANKRD33	12		-0.0021781	0.0172746	0.334303		0.00157864	0.0807834	0.776333		0.00159459	0.137383	0.678849
PRAMEF1	1		-0.00194953	0.0406523	0.511119		-0.00158443	0.0805243	0.776333		0.000500359	0.658172	0.935519
RBBP5	1		0.00247335	0.352588	0.885391		0.00414686	0.0806109	0.776333		0.0066452	0.0259751	0.378024
OR2G6	1		0.000510341	0.580306	0.940899		-0.0014777	0.0808348	0.776333		-0.00312125	0.00276036	0.112563
STMP1	7		-0.000156372	0.815902	0.98314		-0.0010904	0.0807242	0.776333		9.19e-05	0.906141	0.985015
TPBGL	11		0.000163365	0.899702	0.991567		-0.00214941	0.0806248	0.776333		-0.00187397	0.219915	0.764756
PCTP	17		9.44e-05	0.915566	0.993294		-0.0014125	0.0808096	0.776333		-0.00107604	0.28119	0.801119
TMEM213	7		-7.37e-05	0.940954	0.99521		-0.00156507	0.0807449	0.776333		-0.00131087	0.237122	0.774798
DLG5	10		0.00342488	0.0140539	0.295804		0.00243192	0.0810183	0.776705		-0.00402291	0.0147031	0.294341
BTN2A1	6		-0.000394021	0.576029	0.940089		-0.00120203	0.0810206	0.776705		0.000747857	0.390698	0.84802
ENTPD5	14		-0.000490769	0.587871	0.943159		-0.00149544	0.0810822	0.776705		-0.000946173	0.369123	0.838649
TSSK2	22		-0.00022946	0.820988	0.983195		0.00179878	0.0810891	0.776705		0.000114382	0.926718	0.989242
NLRP9	19		0.000163163	0.839155	0.985377		-0.00128646	0.0810665	0.776705		-0.000799161	0.398161	0.851673
PSMG2	18		0.00347136	0.220671	0.825113		-0.00462247	0.0811871	0.777231		-0.00270468	0.42399	0.864437
ZNF460	19		0.0027757	0.0405074	0.510009		-0.00204829	0.0824281	0.777543		-0.00358199	0.0180187	0.321486
MTHFD2	2		-0.00247997	0.043293	0.521189		-0.00195713	0.0823095	0.777543		0.00271702	0.0534441	0.503362
SIX2	2		-0.00152906	0.0618681	0.589455		-0.00130148	0.0821577	0.777543		0.00120525	0.205329	0.751678
SF3B4	1		-0.00472572	0.0633662	0.595088		-0.00423459	0.0818854	0.777543		0.0011507	0.705743	0.947109
SPATA2	20		-0.00182953	0.0825043	0.639207		-0.00168721	0.081724	0.777543		0.0018637	0.121227	0.656686
YBX1	1		-0.00344296	0.150075	0.752547		-0.00384977	0.0819243	0.777543		-0.000632567	0.8173	0.971069
SBK2	19		-0.00125886	0.192287	0.797891		-0.0015638	0.0819615	0.777543		0.000462311	0.687252	0.94348
IQSEC1	3		0.000995707	0.23709	0.838571		0.00141539	0.0821923	0.777543		-0.000680359	0.500487	0.891563
ENO1	1		0.00344764	0.289915	0.86518		0.00559154	0.0818142	0.777543		0.00263576	0.503285	0.892239
LDAF1	16		-0.000658059	0.354567	0.887311		-0.001172	0.0817435	0.777543		-0.000589798	0.480967	0.884695
PPP1R3D	20		0.000740393	0.394503	0.895301		-0.00135697	0.082091	0.777543		-0.00102207	0.309565	0.818733
ANXA13	8		0.00088659	0.427008	0.907618		0.00187485	0.0820989	0.777543		0.00152374	0.261902	0.788268
VSTM1	19		-0.000536348	0.486141	0.92385		-0.00128228	0.0813497	0.777543		0.000275077	0.763692	0.95896
PSMF1	20		-0.00137893	0.487572	0.924087		-0.003139	0.0820717	0.777543		-0.00106271	0.6353	0.9281
KRTAP19.3	21		-0.000652221	0.529392	0.931268		-0.0016797	0.082299	0.777543		-0.000177378	0.883107	0.981594
TRMT61B	2		-0.000827057	0.537586	0.933969		-0.00215386	0.0815467	0.777543		-0.000756881	0.624716	0.925161
TRAM1L1	4		-0.000501743	0.594771	0.944596		-0.00161012	0.0813077	0.777543		-0.00138317	0.22888	0.769785
DOK6	18		0.000348336	0.611468	0.950314		-0.00112538	0.0821115	0.777543		-0.000491614	0.5504	0.906616
COL14A1	8		0.000403873	0.632907	0.952633		0.00169369	0.0823527	0.777543		0.00105284	0.386853	0.84705
SERBP1	1		0.000723597	0.753687	0.977053		-0.00380587	0.0815377	0.777543		-0.00301978	0.273013	0.793837
CT62	15		-0.00023564	0.761937	0.977344		-0.00129343	0.0824185	0.777543		-0.0016271	0.0749275	0.570645
EHD1	11		0.000167823	0.863025	0.988693		0.00163449	0.0821719	0.777543		0.00213606	0.0689113	0.554565
GLRB	4		-7.8e-05	0.917498	0.993733		-0.00120172	0.0823669	0.777543		-0.000863534	0.321556	0.821826
PSME3	17		0.000126198	0.928627	0.994257		-0.00223893	0.0819452	0.777543		-0.000610096	0.708646	0.947227
GGT5	22		-6.49e-05	0.951495	0.996115		-0.00174025	0.0823214	0.777543		-0.00163991	0.192129	0.738279
ACACA	17		0.000141193	0.951082	0.996115		0.00422232	0.0820583	0.777543		-0.00090286	0.746705	0.95527
JAK1	1		-6.23e-05	0.967585	0.997126		0.0025176	0.0817793	0.777543		0.00346921	0.0554349	0.511404
MSL3	X		4.36e-05	0.969951	0.997247		-0.00173394	0.0819989	0.777543		-0.00140646	0.255242	0.783388
RABL2A	2		0.00204457	0.0989517	0.673014		0.00196579	0.0825039	0.777619		-0.000766054	0.601437	0.920502
BCL2L12	19		-0.000344578	0.746669	0.975387		-0.00168449	0.0825225	0.777619		-0.000323651	0.792817	0.966089
CCL1	17		-0.0010601	0.218236	0.823027		-0.00143723	0.0825741	0.777699		-3.35e-05	0.973811	0.9966
FYN	6		-0.000969872	0.251106	0.846137		-0.00136692	0.0827196	0.778171		-0.00033965	0.732306	0.952904
H2AC11	6		-0.00101955	0.304756	0.867971		-0.00157729	0.0827539	0.778171		-4.69e-05	0.967583	0.996589
KIF25	6		-0.000464185	0.479011	0.922424		-0.00104328	0.0827309	0.778171		-0.000190073	0.800267	0.96689
SPATA5	4		0.00407982	0.0821899	0.638975		0.00382017	0.0828899	0.779044		-0.00395921	0.155502	0.698041
MFGE8	15		-0.0013604	0.0344	0.477492		-0.00108008	0.083429	0.779147		-7.32e-05	0.923439	0.988039
CEP83	12		-0.00173946	0.0420184	0.514752		-0.00144855	0.0833902	0.779147		0.00114167	0.27201	0.793396
CCL11	17		-0.00133743	0.0823363	0.638975		-0.00126736	0.0833673	0.779147		0.000867521	0.34494	0.831745
CELSR1	22		-0.00115952	0.102443	0.679364		-0.00118355	0.083059	0.779147		0.000608516	0.479078	0.883746
LDHD	16		0.00121444	0.205576	0.810359		0.00152299	0.0831375	0.779147		-0.000584077	0.597212	0.918954
LCLAT1	2		-0.000754157	0.262685	0.852603		0.00123244	0.0834195	0.779147		0.000914615	0.292493	0.808557
PRRX1	1		-0.000924134	0.287173	0.86457		0.00145469	0.0833853	0.779147		0.0021094	0.0418719	0.457328
NFE2L2	2		-0.00135983	0.345458	0.881015		0.0029694	0.0831489	0.779147		0.000991384	0.600419	0.919877
STK17B	2		-0.0007906	0.37324	0.892352		-0.00151779	0.0834063	0.779147		0.000409962	0.708021	0.947185
EIF3M	11		-0.00184418	0.465483	0.918769		-0.00428132	0.08316	0.779147		-0.00373439	0.217702	0.762793
DGCR6	22		0.000330924	0.759573	0.977344		0.00179564	0.083463	0.779147		0.000509181	0.692016	0.94459
FGF7	15		-0.000206715	0.779487	0.978584		0.00124221	0.0832474	0.779147		0.000568505	0.521449	0.897624
CXCR6	3		0.000200764	0.78518	0.979735		0.00117413	0.0832034	0.779147		0.000537276	0.52451	0.898543
OPRL1	20		-0.000904086	0.298774	0.866887		-0.00145191	0.0835138	0.779217		-0.00137819	0.183002	0.729453
ENOX2	X		0.00289901	3.02e-05	0.00176309		0.00108936	0.0837424	0.780542		-0.00244794	0.00188329	0.0870031
NLRC4	2		-0.00015201	0.849993	0.987511		0.00136557	0.0837054	0.780542		0.000620534	0.528261	0.899525
CLCF1	11		-0.00155427	0.0549747	0.569563		0.00152937	0.083903	0.780826		0.00213995	0.0426261	0.459523
YWHAQ	2		-0.00178191	0.0662863	0.604403		-0.00170534	0.0838765	0.780826		0.00198227	0.107246	0.637494
H2BC5	6		-0.00098533	0.336493	0.880227		-0.00163677	0.0838304	0.780826		-0.000666505	0.571123	0.911923
AMMECR1L	2		0.000734906	0.417957	0.903675		0.00145664	0.0840814	0.782083		-0.000241445	0.817409	0.971069
MEGF8	19		7.6e-05	0.941626	0.99522		-0.00162186	0.084193	0.782717		-0.00130739	0.270554	0.792389
NFX1	9		0.00198956	0.0382913	0.497059		-0.00143033	0.0843596	0.783861		-0.00332927	0.00163128	0.0798661
CPXCR1	X		0.00439728	4.68e-07	4.56e-05		0.00138263	0.0848325	0.785716		-0.00403793	6.64e-05	0.0071176
SAT1	X		0.00298626	1.96e-05	0.00120702		0.00106789	0.0849517	0.785716		-0.00168834	0.0329193	0.417681
WFDC10A	20		0.00138518	0.146737	0.74642		-0.00145118	0.0846636	0.785716		-0.00157675	0.155371	0.698041
SELENOO	22		-0.00120918	0.171334	0.773756		-0.00144993	0.0847395	0.785716		0.00122022	0.24555	0.777161
HNRNPR	1		-0.00184033	0.334146	0.879371		-0.00308896	0.0847877	0.785716		-0.00538241	0.0139849	0.288483
ZC2HC1A	8		-0.000750823	0.424204	0.907166		-0.00145755	0.0847183	0.785716		0.000361769	0.734296	0.953014
CD151	11		-0.000325722	0.769169	0.978198		0.00194247	0.0848677	0.785716		0.000120831	0.926792	0.989242
MCHR1	22		0.000245658	0.78825	0.979877		-0.00145937	0.0849378	0.785716		-0.00142711	0.188035	0.733298
CHST3	10		-0.000112999	0.903025	0.992014		-0.00158162	0.084918	0.785716		-0.000652379	0.571135	0.911923
SLC15A1	13		-0.00205336	0.00886354	0.217271		-0.00129142	0.0854416	0.785826		0.00154502	0.0935794	0.613286
SH3PXD2B	5		0.00172556	0.0317414	0.466845		-0.00122445	0.085336	0.785826		-0.00217006	0.0187946	0.32876
RPS8	1		-0.00365608	0.106537	0.689715		-0.00373036	0.0852336	0.785826		-0.000500883	0.853465	0.976608
EIF3L	22		0.00234571	0.15656	0.757266		-0.00261925	0.0851659	0.785826		-0.00336333	0.0870525	0.599322
DENND5A	11		-0.00108104	0.262267	0.852124		-0.00149412	0.0850688	0.785826		0.000238981	0.823481	0.971542
LILRA1	19		-0.000858357	0.3019	0.86732		-0.0013595	0.0852815	0.785826		-8.54e-05	0.931155	0.990531
BRSK1	19		0.000846182	0.357733	0.887779		-0.00143054	0.0854433	0.785826		-0.0017563	0.0969725	0.617934
ZNF28	19		-0.000830139	0.439728	0.911584		-0.00166459	0.0852308	0.785826		-0.00125133	0.295543	0.810555
PTOV1	19		-0.000687688	0.553125	0.936254		-0.00187058	0.0854217	0.785826		-0.000593236	0.663527	0.93699
SNAPC3	9		0.0003085	0.919418	0.993795		0.00507248	0.0854006	0.785826		0.00101023	0.780091	0.961528
WT1	11		-6.74e-06	0.994311	0.998706		0.00162105	0.0851792	0.785826		-0.000104013	0.928858	0.989792
ERVFRD.1	6		-0.00168334	0.0391794	0.500883		-0.00137676	0.0857472	0.786277		0.00161297	0.114742	0.647552
TCF3	19		-0.00250707	0.0509911	0.557296		-0.00193032	0.0857388	0.786277		0.000381138	0.78257	0.961842
ICE1	5		0.00261889	0.226123	0.832129		-0.00340172	0.0856492	0.786277		-0.00155468	0.537706	0.901641
PFN2	3		0.00117216	0.253088	0.847348		0.00160493	0.0858004	0.786277		0.000344252	0.774091	0.961147
TNNT2	1		0.00200818	0.356307	0.887311		-0.00339135	0.0858379	0.786277		-0.00523222	0.0329039	0.417681
NCR3LG1	11		-0.000642571	0.360139	0.888367		-0.00109009	0.0856189	0.786277		0.000114544	0.885216	0.981594
ZNF648	1		-0.000359774	0.69446	0.967552		0.00146711	0.0858852	0.786277		0.000419254	0.69223	0.94459
SCN11A	3		7.47e-05	0.901236	0.991676		0.000951912	0.0856978	0.786277		-0.000304128	0.658683	0.935519
PTK2B	8		2.76e-05	0.975329	0.997289		-0.00135344	0.0858835	0.786277		-0.00147765	0.129008	0.667292
STIM1	11		0.000911836	0.357198	0.887416		-0.00149926	0.0859351	0.786334		-0.00179545	0.105599	0.63367
NCKAP5	2		0.000362694	0.700262	0.969143		0.00157572	0.0860356	0.786855		0.000237399	0.834336	0.97333
FRY	13		-0.000871058	0.304195	0.867841		-0.00141993	0.0861083	0.78712		0.000112226	0.912387	0.986348
IL13RA2	X		0.00457096	1.3e-11	9.23e-09		0.00100605	0.0864049	0.787154		-0.00344765	5.07e-06	0.000941257
FAM9A	X		0.00417893	5.25e-05	0.00293904		0.00151835	0.0872941	0.787154		-0.00359943	0.00205315	0.0922843
NSDHL	X		0.0033333	7.21e-05	0.00382991		0.00137552	0.0862331	0.787154		-0.00318109	0.00169604	0.0814868
MAVS	20		-0.002609	0.00488458	0.14036		-0.00155202	0.0865391	0.787154		0.00161173	0.148294	0.689971
C11orf40	11		-0.00226292	0.00647565	0.173361		-0.00137177	0.0871389	0.787154		0.00157867	0.113419	0.64678
RGS10	10		0.00169879	0.0260341	0.422193		0.00122426	0.0866486	0.787154		-0.000111648	0.901714	0.983068
TDRD1	10		0.00142393	0.0270127	0.427875		0.00101698	0.0865002	0.787154		-0.000255567	0.733068	0.953014
SH3BP5L	1		0.00185976	0.0662485	0.604403		-0.00153847	0.0874463	0.787154		-0.0042056	0.000234412	0.0191973
OR2AG1	11		-0.00136548	0.0754956	0.625094		-0.00114307	0.0872643	0.787154		0.00126819	0.13621	0.677055
ST3GAL3	1		-0.0016754	0.082599	0.639255		-0.00154389	0.0872746	0.787154		0.000535591	0.625426	0.92537
SYN3	22		-0.00107879	0.137775	0.735793		-0.00111916	0.0878114	0.787154		0.000161727	0.842242	0.974344
LCN1	9		-0.00226896	0.138529	0.736895		-0.00253217	0.0876429	0.787154		0.00271667	0.145282	0.689346
SMIM5	17		-0.0014652	0.153321	0.755606		-0.00167824	0.0879502	0.787154		0.000384865	0.749962	0.955433
TMEM132B	12		-0.000985528	0.155174	0.756346		0.00112936	0.0874695	0.787154		0.00147332	0.0690649	0.5548
OR52M1	11		-0.00121584	0.155565	0.75656		-0.00139387	0.0878334	0.787154		0.00116784	0.255472	0.783388
SLC43A1	11		0.00140012	0.159544	0.757776		0.0016834	0.086621	0.787154		-0.00206622	0.0787733	0.581054
C1orf43	1		0.0017447	0.160808	0.758674		0.00194045	0.0866406	0.787154		-0.000467202	0.74519	0.95527
HGFAC	4		-0.00115555	0.220654	0.825113		-0.00150641	0.0871982	0.787154		0.000722711	0.511487	0.895447
PENK	8		0.00102963	0.235285	0.837887		0.00146357	0.0876862	0.787154		0.000932707	0.396922	0.851095
PADI1	1		-0.000868224	0.250624	0.845393		0.00117597	0.0876025	0.787154		0.00127778	0.134231	0.674977
HNRNPC	14		-0.00250918	0.274938	0.857611		-0.00378177	0.0872976	0.787154		0.00182566	0.505846	0.893203
THEGL	4		0.00111652	0.295556	0.866612		0.00172995	0.0863789	0.787154		-0.000218098	0.861878	0.978911
PNN	14		-0.00203264	0.32503	0.876593		-0.00336516	0.0872982	0.787154		-0.00200972	0.419478	0.861771
LAMB2	3		0.000785689	0.389308	0.894899		0.00149856	0.0873103	0.787154		-0.000949746	0.382385	0.844442
MICA	6		0.000737876	0.396585	0.896297		0.00139706	0.0866945	0.787154		0.00041788	0.687853	0.94348
NAPB	20		0.000534171	0.494099	0.92433		-0.0012753	0.0867332	0.787154		-0.000184676	0.84267	0.974344
[truncated: 16,020 more rows]
