# Supplementary material for: Gene essentiality in cancer cell lines is modified by the sex chromosomes
Source: HighWire-hosted journal article supplement (doi:10.1101/gr.276488.121), 2022-11-01
Supplement: Supplemental_Table_S4.xlsx [file Supplemental_Table_S4.xlsx]

## Sheet: Table S4
Table S4. Sex differences in the rate of nonsynonymous somatic mutations on the X-chromosome
		Number of mutations
Gene Symbol		Males	Females	M:F ratio (normalized)	P value	FDR
KDM6A		189	89	1.98558	2e-06	0.00061
DDX3X		103	41	2.34892	2e-06	0.00061
KLHL4		157	86	1.70693	2.2e-05	0.00447333
KDM5C		126	60	1.96351	8.4e-05	0.01281
ARMCX4		65	24	2.53231	0.00015	0.0176029
UBE2A		6	24	0.233752	0.0002	0.0176029
THOC2		79	121	0.610459	0.000202	0.0176029
SOX3		18	48	0.350628	0.000272	0.02074
MXRA5		327	222	1.37724	0.000346	0.0234511
HTR2C		76	36	1.9739	0.00044	0.02684
FUNDC2		6	21	0.267145	0.000524	0.0281617
APEX2		14	37	0.353786	0.000554	0.0281617
DLG3		29	53	0.511608	0.000736	0.0345354
PAK3		75	32	2.19142	0.000886	0.0386043
TAF9B		7	20	0.327252	0.001204	0.043676
MAGEC1		290	196	1.38343	0.00129	0.043676
OR13H1		51	22	2.16752	0.001326	0.043676
KLHL34		38	73	0.486716	0.0014	0.043676
OPHN1		42	71	0.553103	0.001412	0.043676
ZMYM3		66	104	0.59337	0.001432	0.043676
SOWAHD		8	24	0.311669	0.001612	0.0468248
ERAS		9	24	0.350628	0.002346	0.0640235
CXorf56		10	24	0.389586	0.002414	0.0640235
ZBTB33		31	55	0.527004	0.002886	0.0714638
NXF3		68	33	1.92668	0.003022	0.0714638
RNF113A		10	28	0.333931	0.003046	0.0714638
ITM2A		46	17	2.53002	0.003528	0.0748267
ITIH6		83	123	0.63094	0.00361	0.0748267
TMEM185A		6	19	0.295265	0.003644	0.0748267
TGIF2LX		77	44	1.63626	0.00368	0.0748267
SYP		8	20	0.374003	0.005338	0.105038
TSPAN6		6	15	0.374003	0.005794	0.110448
CNKSR2		115	72	1.49341	0.007552	0.139598
HMGN5		6	17	0.330002	0.007938	0.142417
PUDP		30	11	2.55002	0.008654	0.147179
FGF13		57	31	1.71921	0.008686	0.147179
POF1B		84	47	1.67108	0.009314	0.148867
TAB3		42	66	0.595004	0.009834	0.148867
TBX22		86	54	1.48909	0.009938	0.148867
VSIG4		23	40	0.537629	0.010064	0.148867
NONO		33	51	0.605004	0.010096	0.148867
FOXO4		23	40	0.537629	0.01056	0.148867
OPN1LW		42	21	1.87001	0.01059	0.148867
VAMP7		32	13	2.30156	0.011026	0.148867
USP26		116	74	1.46569	0.011212	0.148867
GK		20	34	0.550004	0.011226	0.148867
CLCN5		43	61	0.659103	0.012026	0.154457
GPR174		66	39	1.58232	0.012154	0.154457
LDOC1		28	13	2.01386	0.013402	0.166841
GNL3L		36	53	0.635099	0.013684	0.166945
BCLAF3		28	42	0.623338	0.014784	0.175915
GPKOW		22	37	0.55595	0.014996	0.175915
GCNA		54	73	0.691649	0.015952	0.183316
2021-09-06		23	38	0.565925	0.016228	0.183316
RAB39B		10	23	0.406525	0.017268	0.191518
GDPD2		28	44	0.595004	0.017666	0.192433
TIMM17B		11	21	0.489766	0.018314	0.193181
FAM3A		7	15	0.436337	0.018368	0.193181
RTL4		65	36	1.68821	0.01915	0.197477
GLA		16	30	0.49867	0.019424	0.197477
PCDH11X		239	193	1.15786	0.020708	0.20708
RTL3		85	55	1.44501	0.02142	0.210745
ARL13A		14	26	0.503465	0.023692	0.222742
CFAP47		228	173	1.23226	0.02381	0.222742
SLC25A14		16	28	0.53429	0.023954	0.222742
FAAH2		65	32	1.89923	0.0241	0.222742
SUV39H1		19	31	0.573069	0.024502	0.223078
USP9X		164	113	1.357	0.025736	0.230867
WAS		22	36	0.571393	0.027022	0.23889
DUSP9		18	31	0.542907	0.02802	0.243124
MAOB		24	33	0.680005	0.028298	0.243124
MAGEC2		97	65	1.39532	0.029658	0.251269
USP51		36	54	0.623338	0.030188	0.252256
SLC35A2		10	21	0.445241	0.032322	0.26466
F8		149	170	0.819506	0.032956	0.26466
ACSL4		27	43	0.587097	0.032974	0.26466
YY2		21	34	0.577504	0.033508	0.265453
PGRMC1		8	16	0.467503	0.034982	0.273577
MED14		86	49	1.64103	0.038172	0.292205
FGD1		53	71	0.697963	0.038322	0.292205
DCAF12L1		109	78	1.30661	0.03882	0.292348
WWC3		73	97	0.703665	0.039762	0.29579
DRP2		60	79	0.710132	0.040816	0.29679
NEXMIF		202	139	1.35879	0.041264	0.29679
OFD1		75	48	1.46095	0.041356	0.29679
SRPK3		24	35	0.641148	0.04247	0.297375
CUL4B		44	59	0.697293	0.042618	0.297375
ZCCHC13		14	23	0.569135	0.04294	0.297375
CNGA2		93	61	1.4255	0.044638	0.297375
LANCL3		14	22	0.595004	0.04472	0.297375
PLP2		11	21	0.489766	0.045102	0.297375
MAGT1		22	36	0.571393	0.045348	0.297375
SERPINA7		61	36	1.58432	0.045362	0.297375
CCDC120		30	44	0.637505	0.046562	0.297375
MECP2		28	42	0.623338	0.047306	0.297375
NKAP		25	38	0.615136	0.04739	0.297375
NAP1L3		71	46	1.44316	0.047502	0.297375
ACTRT1		81	56	1.35242	0.048122	0.297375
CETN2		10	16	0.584379	0.048272	0.297375
TCEAL2		34	17	1.87001	0.04875	0.297375
RRAGB		21	33	0.595004	0.04969	0.298206
MED12		133	161	0.772397	0.049864	0.298206
SH3KBP1		34	44	0.722505	0.053154	0.313828
ZNF185		28	37	0.707573	0.053844	0.313828
IDH3G		15	25	0.561004	0.054178	0.313828
CXorf21		36	19	1.77159	0.054534	0.313828
MORC4		43	59	0.681446	0.05626	0.318178
STK26		19	28	0.634469	0.05707	0.318178
MAP7D2		60	37	1.51623	0.057374	0.318178
EFNB1		14	25	0.523604	0.057842	0.318178
GPRASP1		76	99	0.717783	0.057898	0.318178
XIAP		28	42	0.623338	0.059136	0.318923
MTM1		35	43	0.761052	0.059314	0.318923
IL1RAPL2		87	58	1.40251	0.059602	0.318923
IGSF1		168	119	1.32001	0.061128	0.324244
MOSPD2		38	20	1.77651	0.063254	0.332629
NLGN3		50	68	0.687505	0.06388	0.33305
UPF3B		26	35	0.694577	0.064638	0.334146
UBQLN2		35	51	0.641671	0.06612	0.338934
PRICKLE3		29	39	0.695262	0.068036	0.342369
PNCK		24	32	0.701255	0.068154	0.342369
ARSE		44	28	1.4693	0.068518	0.342369
UTP14A		35	47	0.696282	0.070746	0.342369
MTMR8		71	45	1.47523	0.071	0.342369
NRK		168	128	1.2272	0.0711	0.342369
PABPC5		77	56	1.28563	0.071142	0.342369
IL1RAPL1		98	71	1.29057	0.07128	0.342369
MCTS1		8	16	0.467503	0.072604	0.344428
DCX		68	44	1.44501	0.072838	0.344428
ADGRG4		302	242	1.16683	0.075518	0.352616
ALG13		58	72	0.7532	0.076066	0.352616
PIR		8	14	0.53429	0.07656	0.352616
BCAP31		10	14	0.667862	0.077606	0.352616
SLC25A43		12	19	0.590531	0.077824	0.352616
ZNF449		25	35	0.667862	0.078038	0.352616
HDAC6		52	64	0.759693	0.079848	0.358142
CXorf40A		10	17	0.550004	0.082536	0.365239
GATA1		27	38	0.664347	0.08287	0.365239
AIFM1		26	38	0.639742	0.083262	0.365239
SPANXN1		20	9	2.07779	0.083848	0.365239
ASB11		29	18	1.5064	0.084424	0.365239
FHL1		16	23	0.65044	0.086144	0.369272
GPC4		40	48	0.779172	0.087898	0.369272
OTC		46	28	1.53608	0.08912	0.369272
IQSEC2		58	73	0.742882	0.08936	0.369272
NXF5		44	28	1.4693	0.08953	0.369272
MAGEB16		56	37	1.41515	0.090526	0.369272
RTL8B		8	15	0.49867	0.090764	0.369272
PRPS2		20	28	0.667862	0.091028	0.369272
TSC22D3		8	13	0.575389	0.09113	0.369272
TFE3		45	57	0.738163	0.09141	0.369272
TEX11		55	66	0.779172	0.094256	0.37761
SCML2		46	52	0.827122	0.094712	0.37761
BHLHB9		31	42	0.690124	0.095762	0.379317
DOCK11		101	112	0.843176	0.096658	0.380396
MAGEA1		39	24	1.51939	0.09854	0.384613
PORCN		23	33	0.651672	0.099494	0.384613
GPR101		74	55	1.25801	0.099796	0.384613
ARSF		51	61	0.781727	0.100686	0.384613
LONRF3		38	51	0.696672	0.100882	0.384613
CHRDL1		59	42	1.31346	0.101796	0.385687
SAGE1		117	87	1.25742	0.102696	0.386695
MAGEB18		65	43	1.41338	0.10571	0.395602
ARHGEF6		57	70	0.761363	0.110534	0.411133
SRPX		28	38	0.688952	0.113218	0.418564
MID1		29	40	0.67788	0.11413	0.419393
FAM47C		211	170	1.16051	0.115162	0.419462
TBL1X		36	45	0.748006	0.115524	0.419462
HPRT1		8	13	0.575389	0.116548	0.419816
SASH3		20	29	0.644832	0.116998	0.419816
SLITRK4		125	96	1.21746	0.117724	0.419951
RHOXF2		12	18	0.623338	0.119498	0.420117
FLNA		148	169	0.818823	0.11991	0.420117
MAGED1		62	42	1.38025	0.120002	0.420117
SLC9A7		35	45	0.727228	0.120948	0.420117
RNF128		27	34	0.742506	0.121214	0.420117
G6PD		29	40	0.67788	0.123266	0.424815
FOXP3		16	23	0.65044	0.126012	0.429987
STARD8		62	75	0.772939	0.127966	0.429987
AMER1		120	139	0.8072	0.128056	0.429987
TRPC5		124	94	1.23341	0.128676	0.429987
JADE3		39	47	0.775857	0.128816	0.429987
PHF6		31	20	1.44926	0.128996	0.429987
ACE2		38	46	0.772397	0.133866	0.443795
FAM120C		64	72	0.831117	0.139974	0.460406
MID1IP1		9	14	0.601076	0.140386	0.460406
REPS2		39	45	0.810339	0.143708	0.46878
PRRG1		28	15	1.74535	0.146354	0.474872
MAGEA12		53	37	1.33933	0.149438	0.482313
SPIN4		8	14	0.53429	0.152432	0.482914
CXorf66		49	34	1.34751	0.153126	0.482914
MBTPS2		18	24	0.701255	0.153268	0.482914
ZRSR2		28	15	1.74535	0.153524	0.482914
DKC1		22	29	0.709316	0.154228	0.482914
MAGEE2		71	46	1.44316	0.154374	0.482914
SLC38A5		16	21	0.712386	0.156394	0.486736
HTATSF1		42	50	0.785406	0.157208	0.486786
EMD		13	18	0.675283	0.158612	0.487878
PQBP1		14	20	0.654505	0.159664	0.487878
ZDHHC15		40	26	1.43847	0.15996	0.487878
GPR143		13	20	0.607755	0.161184	0.488248
FMR1NB		39	27	1.35057	0.161682	0.488248
GYG2		24	32	0.701255	0.163124	0.490176
ZXDB		35	46	0.711418	0.163962	0.490279
PTCHD1		58	66	0.821673	0.1652	0.491571
ARSD		45	30	1.40251	0.167742	0.494507
GRIPAP1		36	45	0.748006	0.167808	0.494507
HSD17B10		8	13	0.575389	0.171222	0.497754
LPAR4		66	48	1.28563	0.17171	0.497754
SLC9A6		31	41	0.706956	0.172034	0.497754
AKAP14		11	17	0.605004	0.172174	0.497754
ZIC3		41	53	0.723307	0.173566	0.499066
GABRQ		81	58	1.30579	0.174264	0.499066
P2RY4		37	24	1.44147	0.175732	0.500918
MAGED2		33	42	0.734648	0.181062	0.504942
HMGB3		10	13	0.719236	0.181994	0.504942
SYTL5		65	46	1.32121	0.182156	0.504942
OGT		53	63	0.786593	0.182242	0.504942
PCDH19		113	92	1.14843	0.182264	0.504942
ZC4H2		23	29	0.741557	0.18232	0.504942
GLRA4		44	30	1.37134	0.182938	0.504942
TBC1D25		42	56	0.701255	0.18543	0.508654
WNK3		133	101	1.23125	0.186564	0.508654
IDS		31	37	0.783384	0.187634	0.508654
PPP1R3F		31	38	0.762769	0.18771	0.508654
PDZD4		52	61	0.797055	0.188452	0.508654
TCEANC		22	13	1.58232	0.192914	0.514594
PFKFB1		34	43	0.739308	0.19299	0.514594
SHROOM4		102	106	0.899724	0.193778	0.514594
ARMCX2		38	47	0.755963	0.19511	0.514594
COL4A5		190	140	1.26894	0.195866	0.514594
GLUD2		55	68	0.756256	0.196052	0.514594
IGBP1		13	17	0.715005	0.196558	0.514594
ZXDA		38	50	0.710605	0.197468	0.514767
PAGE5		12	15	0.748006	0.19924	0.516716
PIH1D3		17	9	1.76612	0.20134	0.516716
LAS1L		37	46	0.752071	0.202294	0.516716
APOO		9	13	0.647313	0.204806	0.516716
ATP7A		88	100	0.822806	0.204954	0.516716
NOX1		40	44	0.850006	0.205452	0.516716
RAB40AL		22	13	1.58232	0.205698	0.516716
IRS4		146	132	1.03417	0.205912	0.516716
GLRA2		53	39	1.27065	0.2077	0.516716
COL4A6		131	98	1.24986	0.208008	0.516716
RBMXL3		81	60	1.26226	0.20809	0.516716
KCND1		34	42	0.75691	0.209264	0.516716
RAB33A		14	18	0.727228	0.209406	0.516716
AR		108	87	1.1607	0.210358	0.516716
PGK1		17	22	0.722505	0.211692	0.516716
GSPT2		40	46	0.81305	0.2121	0.516716
PRR32		16	9	1.66223	0.212616	0.516716
ARMCX1		36	23	1.46349	0.215474	0.51984
GPR119		34	20	1.58951	0.216378	0.51984
SMC1A		79	66	1.11917	0.216458	0.51984
CHST7		16	20	0.748006	0.219932	0.526112
TLR7		77	59	1.22026	0.22157	0.52796
SSX3		16	19	0.787374	0.223598	0.530719
RAP2C		10	15	0.623338	0.226736	0.536081
ARR3		20	23	0.81305	0.229994	0.541685
BRS3		34	22	1.44501	0.232602	0.54572
ARMCX5		24	31	0.723876	0.233586	0.545929
RLIM		39	44	0.828756	0.234762	0.546583
GEMIN8		21	13	1.5104	0.236288	0.548044
MAGEA4		56	42	1.24668	0.23792	0.549649
ELF4		52	36	1.35057	0.238782	0.549649
GUCY2F		105	80	1.2272	0.24007	0.550536
KLF8		28	33	0.793339	0.244232	0.557983
CCNB3		124	95	1.22043	0.245804	0.559479
DIAPH2		88	66	1.24668	0.24885	0.563044
TAF7L		40	46	0.81305	0.249216	0.563044
CXorf65		10	15	0.623338	0.252304	0.567627
F9		64	52	1.15078	0.253106	0.567627
RBM10		86	69	1.16537	0.25443	0.568507
HAUS7		17	22	0.722505	0.255484	0.568778
YIPF6		12	17	0.660005	0.25988	0.57496
CTAG2		20	25	0.748006	0.260146	0.57496
CASK		44	44	0.935007	0.263264	0.577885
ZNF157		37	44	0.786256	0.263364	0.577885
INTS6L		56	64	0.818131	0.266662	0.580234
NAP1L2		70	48	1.36355	0.267112	0.580234
FAM199X		21	26	0.755198	0.267288	0.580234
CENPI		39	45	0.810339	0.27163	0.587568
MBNL3		19	12	1.48043	0.272704	0.587807
GJB1		13	19	0.639742	0.27549	0.591721
EIF2S3		27	15	1.68301	0.27841	0.594627
GPR82		19	12	1.48043	0.279376	0.594627
GRIA3		78	86	0.84803	0.280238	0.594627
AWAT2		24	15	1.49601	0.280742	0.594627
DNASE1L1		14	19	0.688952	0.283508	0.597102
RBMX		45	32	1.31485	0.28449	0.597102
ATP1B4		43	30	1.34018	0.285312	0.597102
BEX1		10	13	0.719236	0.285826	0.597102
PHF8		54	61	0.827711	0.287814	0.599203
MSL3		45	34	1.23751	0.289428	0.599471
PDHA1		25	31	0.754038	0.289908	0.599471
BRWD3		134	145	0.864075	0.293706	0.602279
TSPYL2		34	39	0.815134	0.293792	0.602279
UBA1		51	36	1.32459	0.294228	0.602279
ZNF630		45	30	1.40251	0.300734	0.611881
ESX1		49	55	0.833006	0.3019	0.611881
SH3BGRL		14	7	1.87001	0.301928	0.611881
MAGIX		21	26	0.755198	0.303854	0.613745
SH2D1A		13	16	0.759693	0.306672	0.615446
L1CAM		112	95	1.10232	0.306714	0.615446
PLXNB3		100	104	0.899045	0.307992	0.615984
IRAK1		41	45	0.851895	0.313672	0.625294
ZFP92		21	14	1.40251	0.316598	0.628379
PNPLA4		14	16	0.818131	0.31728	0.628379
TMLHE		19	24	0.740214	0.31957	0.629016
ARX		13	15	0.810339	0.319664	0.629016
TKTL1		35	40	0.818131	0.322244	0.632054
DCAF12L2		109	99	1.02945	0.323526	0.632535
EDA2R		29	21	1.2912	0.32766	0.637895
PGAM4		12	17	0.660005	0.330914	0.637895
ZDHHC9		19	21	0.845959	0.331592	0.637895
MAGEB6		88	73	1.12713	0.33436	0.637895
GPR34		20	14	1.33572	0.335792	0.637895
EDA		20	23	0.81305	0.336496	0.637895
AKAP4		61	65	0.877468	0.336966	0.637895
PNMA5		34	39	0.815134	0.33771	0.637895
STS		56	40	1.30901	0.338194	0.637895
CFP		25	30	0.779172	0.338768	0.637895
RPS4X		11	12	0.85709	0.338886	0.637895
CACNA1F		104	109	0.892117	0.339784	0.637895
H2BFM		15	9	1.55834	0.340402	0.637895
GRPR		31	22	1.31751	0.340908	0.637895
HEPH		134	106	1.18199	0.343356	0.640511
CDKL5		66	72	0.85709	0.348814	0.648709
AMELX		18	22	0.765006	0.35286	0.648727
MAGEA3		41	27	1.41983	0.353928	0.648727
GDI1		22	26	0.79116	0.354202	0.648727
PRRG3		36	39	0.863083	0.354464	0.648727
ATP6AP1		28	32	0.818131	0.355204	0.648727
ENOX2		46	52	0.827122	0.355854	0.648727
MAP7D3		45	54	0.779172	0.356268	0.648727
RPS6KA6		89	68	1.22376	0.360782	0.652761
RAI2		45	49	0.85868	0.361344	0.652761
SLITRK2		127	116	1.02367	0.361694	0.652761
TSPAN7		17	19	0.836585	0.368604	0.661626
RPGR		65	47	1.29309	0.368852	0.661626
SLC25A53		31	22	1.31751	0.36986	0.661626
CDK16		30	22	1.27501	0.371364	0.662374
ZNF81		50	38	1.23027	0.376762	0.670043
PAGE1		13	15	0.810339	0.381662	0.676784
CHM		42	31	1.26678	0.383112	0.677386
CXCR3		19	21	0.845959	0.385318	0.677912
SLC10A3		24	25	0.897607	0.385632	0.677912
CAPN6		73	57	1.19747	0.396756	0.693974
AMOT		70	77	0.850006	0.397846	0.693974
PIM2		17	22	0.722505	0.398182	0.693974
BCOR		134	120	1.04409	0.402978	0.696237
SRPX2		36	25	1.34641	0.403608	0.696237
UPRT		22	24	0.85709	0.40363	0.696237
FOXR2		40	29	1.28966	0.404046	0.696237
CA5B		18	11	1.53001	0.4055	0.696775
MAGEB4		40	48	0.779172	0.411014	0.704266
MSN		43	49	0.820516	0.415166	0.706686
IL13RA1		20	22	0.850006	0.415548	0.706686
CPXCR1		66	55	1.12201	0.415902	0.706686
ABCD1		42	47	0.835538	0.422374	0.715095
RBBP7		37	26	1.33059	0.423304	0.715095
ACOT9		15	17	0.825006	0.425532	0.715095
FATE1		25	17	1.37501	0.42554	0.715095
PLXNA3		103	106	0.908544	0.429822	0.717711
SSX5		28	29	0.902765	0.430466	0.717711
ERCC6L		49	51	0.89834	0.431292	0.717711
AMMECR1		21	24	0.818131	0.432464	0.717711
LRCH2		48	49	0.915925	0.43298	0.717711
LAMP2		14	17	0.770006	0.440542	0.728267
TENT5D		58	59	0.919159	0.44315	0.730599
XAGE5		14	14	0.935007	0.446144	0.73168
TREX2		14	17	0.770006	0.44685	0.73168
ZCCHC12		36	43	0.782797	0.447662	0.73168
MAGEE1		89	93	0.894792	0.448604	0.73168
SLC6A8		19	20	0.888257	0.452732	0.736444
GABRA3		60	64	0.876569	0.455622	0.738081
DACH2		98	85	1.07801	0.457976	0.738081
DCAF8L2		53	60	0.825923	0.458614	0.738081
GABRE		65	48	1.26616	0.45911	0.738081
DUSP21		23	15	1.43368	0.459788	0.738081
ZC3H12B		51	56	0.851524	0.461172	0.738359
HS6ST2		34	38	0.836585	0.46277	0.738978
TRO		108	92	1.09762	0.464296	0.739012
FAM104B		30	24	1.16876	0.465214	0.739012
PPEF1		46	49	0.877762	0.46854	0.742362
SSX7		22	14	1.4693	0.474942	0.748611
OCRL		56	56	0.935007	0.476648	0.748611
BCORL1		114	120	0.888257	0.477496	0.748611
KIF4A		63	63	0.935007	0.47944	0.748611
CITED1		14	9	1.45446	0.48033	0.748611
SYTL4		54	56	0.901614	0.480374	0.748611
KRBOX4		12	14	0.801435	0.48109	0.748611
NYX		27	33	0.765006	0.482574	0.748611
ARHGAP4		40	43	0.869774	0.484226	0.748611
TCEAL3		12	13	0.863083	0.485626	0.748611
NAA10		11	12	0.85709	0.487134	0.748611
ZNF182		29	32	0.84735	0.48966	0.748611
HDAC8		16	15	0.997341	0.49041	0.748611
EGFL6		33	32	0.964226	0.4915	0.748611
ASB12		28	31	0.844522	0.49205	0.748611
TCEAL4		20	15	1.24668	0.49212	0.748611
CDR1		51	40	1.19213	0.493914	0.749471
RS1		22	17	1.21001	0.497584	0.753167
FAM9A		26	30	0.810339	0.502046	0.755222
LHFPL1		23	19	1.13185	0.502816	0.755222
CCDC160		14	16	0.818131	0.50376	0.755222
P2RY10		57	49	1.08766	0.503894	0.755222
CT55		16	18	0.831117	0.507774	0.759172
CXorf58		30	31	0.904845	0.510102	0.760149
MAGEC3		119	97	1.14707	0.51092	0.760149
ZNF711		78	74	0.985548	0.514516	0.7619
TMEM255A		28	21	1.24668	0.514632	0.7619
SPANXN2		48	38	1.18106	0.515844	0.7619
FAM50A		20	21	0.890483	0.519754	0.765821
NKRF		29	33	0.821673	0.521354	0.766328
TXLNG		26	18	1.35057	0.522798	0.766603
SMARCA1		73	60	1.13759	0.524226	0.766853
PBDC1		15	17	0.825006	0.525872	0.766998
ATP2B3		99	86	1.07635	0.528718	0.766998
ZFX		37	36	0.960979	0.529168	0.766998
ARHGEF9		32	38	0.787374	0.531194	0.766998
BMP15		36	37	0.909736	0.532378	0.766998
PRKX		20	21	0.890483	0.533438	0.766998
CYBB		57	47	1.13394	0.533638	0.766998
ATP6AP2		28	20	1.30901	0.534384	0.766998
GPM6B		21	14	1.40251	0.540132	0.772431
XK		32	26	1.15078	0.541666	0.772431
MAGEB1		48	43	1.04373	0.541968	0.772431
PJA1		38	39	0.911032	0.546492	0.775551
AFF2		170	158	1.00602	0.5467	0.775551
RTL8A		11	13	0.79116	0.54907	0.775701
CDX4		42	34	1.15501	0.551276	0.775701
ZNF41		43	42	0.957269	0.55199	0.775701
ALAS2		47	39	1.1268	0.552638	0.775701
POLA1		68	67	0.948962	0.553164	0.775701
BMX		35	34	0.962507	0.554946	0.776415
SLC25A5		25	19	1.23027	0.558842	0.780077
HCCS		19	20	0.888257	0.56277	0.783766
GAGE10		16	14	1.06858	0.568632	0.788993
TAZ		16	17	0.880007	0.569574	0.788993
RIBC1		21	22	0.892507	0.571224	0.788993
ANOS1		65	52	1.16876	0.574908	0.788993
NR0B1		40	44	0.850006	0.575106	0.788993
PLS3		35	33	0.991674	0.575542	0.788993
WDR13		34	36	0.883062	0.576002	0.788993
KIAA1210		147	119	1.15501	0.57687	0.788993
RHOXF1		20	22	0.850006	0.58544	0.797678
PHEX		61	51	1.11834	0.585836	0.797678
ABCB7		41	44	0.871256	0.59442	0.806059
NUDT11		14	14	0.935007	0.594634	0.806059
ZMAT1		50	43	1.08722	0.597228	0.807781
PIGA		18	20	0.841506	0.599004	0.80839
IL2RG		29	21	1.2912	0.600894	0.809151
TNMD		28	20	1.30901	0.609794	0.818385
TMEM187		20	15	1.24668	0.611742	0.818385
PHKA2		70	70	0.935007	0.611776	0.818385
CCDC22		27	28	0.901614	0.620408	0.826598
CTPS2		25	18	1.29862	0.620626	0.826598
PRDX4		19	17	1.04501	0.625276	0.829389
TRMT2B		30	23	1.21957	0.625794	0.829389
DDX53		48	47	0.954901	0.628098	0.829389
HUWE1		236	217	1.01687	0.62816	0.829389
PNMA3		36	37	0.909736	0.63373	0.834936
RGN		17	18	0.883062	0.637728	0.835687
OTUD5		24	19	1.18106	0.637858	0.835687
NLGN4X		131	131	0.935007	0.638854	0.835687
GPC3		44	38	1.08264	0.63978	0.835687
SYN1		30	32	0.876569	0.644122	0.83898
FRMD7		57	57	0.935007	0.645052	0.83898
TMEM164		19	20	0.888257	0.649664	0.843181
RPL10		23	16	1.34407	0.654342	0.847449
PCYT1B		31	23	1.26023	0.657666	0.84995
CXorf40B		12	9	1.24668	0.661888	0.853598
C1GALT1C1		24	19	1.18106	0.664174	0.85418
FANCB		42	41	0.957812	0.66514	0.85418
CYLC1		111	98	1.05904	0.671888	0.855745
GPR50		85	83	0.957537	0.672072	0.855745
ADGRG2		68	56	1.13537	0.673726	0.855745
GPR173		23	24	0.896048	0.674078	0.855745
TFDP3		27	28	0.901614	0.67428	0.855745
VGLL1		34	28	1.13537	0.674776	0.855745
SATL1		49	51	0.89834	0.676428	0.85606
MAGEA8		24	26	0.863083	0.679984	0.858389
EBP		14	14	0.935007	0.68207	0.858389
H2BFWT		27	23	1.09762	0.68249	0.858389
RAB9B		13	13	0.935007	0.689942	0.865977
MAMLD1		47	51	0.861673	0.694042	0.867368
ATG4A		23	21	1.02406	0.694096	0.867368
GAB3		41	39	0.982956	0.695316	0.867368
CD40LG		18	20	0.841506	0.700462	0.869815
KLHL13		70	57	1.14825	0.701046	0.869815
OTUD6A		39	35	1.04186	0.701556	0.869815
DGAT2L6		35	31	1.05565	0.705512	0.871523
HNRNPH2		30	30	0.935007	0.70701	0.871523
SLC6A14		47	43	1.02198	0.708288	0.871523
SHROOM2		97	96	0.944747	0.708648	0.871523
FMR1		47	49	0.896843	0.71172	0.87354
DCAF8L1		82	73	1.05028	0.714448	0.875127
DMD		327	318	0.961469	0.71738	0.876577
PHKA1		103	77	1.25072	0.718506	0.876577
RAB41		14	14	0.935007	0.727412	0.885188
RPS6KA3		70	53	1.23491	0.728466	0.885188
FTSJ1		18	22	0.765006	0.73134	0.886913
MAGEA11		47	39	1.1268	0.73477	0.889305
TENM1		258	244	0.988655	0.736328	0.889426
IL13RA2		32	33	0.906673	0.740944	0.892568
TBC1D8B		80	74	1.01082	0.741856	0.892568
TEX13B		23	24	0.896048	0.744098	0.893504
USP11		55	55	0.935007	0.74715	0.894313
RP2		21	18	1.09084	0.747704	0.894313
NSDHL		26	22	1.10501	0.753626	0.89864
TMEM35A		15	11	1.27501	0.754268	0.89864
CT47B1		57	56	0.951704	0.758342	0.901732
SYAP1		21	14	1.40251	0.762366	0.903082
MID2		45	44	0.956257	0.762438	0.903082
ASB9		21	24	0.818131	0.768536	0.908541
CD99L2		22	20	1.02851	0.77043	0.909018
MAGEH1		16	17	0.880007	0.778356	0.916597
EFHC2		45	38	1.10725	0.782816	0.917643
TAF1		115	111	0.968701	0.783058	0.917643
HCFC1		107	102	0.980841	0.784022	0.917643
BTK		61	57	1.00062	0.785348	0.917643
ARSH		43	38	1.05803	0.786766	0.917643
VCX3B		18	15	1.12201	0.794406	0.920689
HDX		62	65	0.891853	0.79447	0.920689
NHS		102	98	0.973171	0.795	0.920689
MAGEA6		43	41	0.980617	0.796878	0.920689
POU3F4		52	48	1.01292	0.796924	0.920689
KCNE5		20	17	1.10001	0.800878	0.92071
CLCN4		53	50	0.991107	0.801174	0.92071
MORF4L2		21	17	1.15501	0.804954	0.92071
PASD1		90	86	0.978496	0.806068	0.92071
ITGB1BP2		24	22	1.02001	0.806086	0.92071
MAGEB3		43	43	0.935007	0.806402	0.92071
RBMX2		22	17	1.21001	0.807508	0.92071
MAGEA10		54	50	1.00981	0.814338	0.926765
MAGEB10		43	40	1.00513	0.815972	0.926896
CBLL2		47	45	0.976563	0.819194	0.927661
FAM9B		15	13	1.07885	0.821202	0.927661
CYSLTR1		27	25	1.00981	0.821846	0.927661
SPANXN3		27	26	0.970969	0.82365	0.927661
ARHGAP6		73	69	0.98921	0.825732	0.927661
RTL5		42	43	0.913263	0.82577	0.927661
GPRASP2		62	61	0.950335	0.82991	0.928935
ATRX		196	224	0.818131	0.82995	0.928935
ATXN3L		27	26	0.970969	0.833772	0.931504
MAGEB2		46	46	0.935007	0.8363	0.931946
PAGE2		12	9	1.24668	0.837224	0.931946
NUP62CL		13	12	1.01292	0.840198	0.932512
SAT1		11	11	0.935007	0.841026	0.932512
TMEM47		19	20	0.888257	0.843532	0.932512
RPA4		28	28	0.935007	0.846092	0.932512
SLC16A2		36	31	1.08581	0.846534	0.932512
TCEAL6		24	21	1.06858	0.846904	0.932512
ARAF		40	36	1.0389	0.859604	0.943431
RTL9		99	100	0.925657	0.859914	0.943431
WDR44		58	50	1.08461	0.86634	0.946878
TCEAL5		20	21	0.890483	0.867714	0.946878
ARMCX6		19	14	1.26894	0.86888	0.946878
XPNPEP2		53	45	1.10123	0.869576	0.946878
NUDT10		11	10	1.02851	0.87162	0.946878
XKRX		31	24	1.20772	0.8731	0.946878
FAM122C		13	11	1.10501	0.873922	0.946878
FTHL17		25	25	0.935007	0.882022	0.953439
CLIC2		15	13	1.07885	0.884128	0.953439
KLHL15		33	28	1.10197	0.885248	0.953439
WDR45		29	27	1.00427	0.887132	0.953439
MCF2		101	97	0.973564	0.887792	0.953439
ARHGAP36		82	80	0.958382	0.89359	0.957979
ZCCHC18		19	16	1.11032	0.900108	0.963273
MTMR1		50	45	1.0389	0.902924	0.963434
FAM133A		31	29	0.99949	0.90441	0.963434
FRMPD4		114	109	0.977897	0.90627	0.963434
BRCC3		17	16	0.993445	0.906576	0.963434
BEND2		76	68	1.04501	0.915872	0.968958
ELK1		25	24	0.973966	0.916944	0.968958
PLP1		21	19	1.03343	0.919348	0.968958
SLC7A3		62	56	1.03519	0.919922	0.968958
AGTR2		46	39	1.10283	0.920548	0.968958
ARMCX3		19	15	1.18434	0.921304	0.968958
MAOA		32	26	1.15078	0.930102	0.976527
SSX1		19	16	1.11032	0.931896	0.976615
VEGFD		22	22	0.935007	0.93472	0.976615
CLDN2		16	13	1.15078	0.935286	0.976615
SPIN3		15	13	1.07885	0.93659	0.976615
AVPR2		28	25	1.04721	0.942346	0.98094
PRPS1		21	18	1.09084	0.94475	0.981767
SMS		24	20	1.12201	0.948558	0.983475
RBM41		19	16	1.11032	0.95147	0.983475
BGN		25	24	0.973966	0.953304	0.983475
VSIG1		21	20	0.981757	0.956426	0.983475
ZNF674		23	19	1.13185	0.958822	0.983475
ZNF75D		44	37	1.1119	0.959158	0.983475
RENBP		27	25	1.00981	0.960128	0.983475
CXorf38		22	17	1.21001	0.96231	0.983475
CSAG1		13	11	1.10501	0.964184	0.983475
FAM155B		32	30	0.997341	0.965296	0.983475
LUZP4		36	31	1.08581	0.96544	0.983475
STAG2		104	91	1.06858	0.96574	0.983475
ATP11C		71	66	1.00584	0.970872	0.986801
AWAT1		24	18	1.24668	0.972242	0.986801
RAB40A		18	16	1.05188	0.977042	0.986895
SCML1		20	16	1.16876	0.977114	0.986895
PDK3		30	24	1.16876	0.977188	0.986895
TLR8		84	71	1.10621	0.983576	0.991705
FAM47B		111	108	0.960979	0.986436	0.992947
ZNF280C		33	29	1.06397	0.989302	0.994191
MPP1		32	28	1.06858	0.99231	0.995574
FAM47A		171	162	0.986952	0.994884	0.996518
CSTF2		37	33	1.04834	0.999924	0.999924
